# Supplementary material for: Photolipid excitation triggers depolarizing optocapacitive currents and action potentials
Source: Springer Nature journal article supplement (doi:10.1038/s41467-024-45403-y), 2024-02-07
Supplement: MOESM1 [file 41467_2024_45403_MOESM1_ESM.pdf › 41467_2024_45403_MOESM1_ESM.pdf]

## **Supplementary to: Photolipid excitation triggers depolarizing optocapacitive currents and action potentials**

Carlos A. Z. Bassetto Jr<sup>1,#</sup>, Juergen Pfeffermann<sup>2,#</sup>, Rohit Yadav<sup>2,#</sup>, Simon Strassgschwandtner<sup>2</sup>, Toma Glasnov<sup>3</sup>, Francisco Bezanilla<sup>1,4,\*</sup>, Peter Pohl<sup>2,\*</sup>

<sup>1</sup>Department of Biochemistry and Molecular Biology, The University of Chicago, Chicago, IL 60637, USA; <sup>2</sup>Institute of Biophysics, Johannes Kepler University Linz, Gruberstraße 40, 4020 Linz, Austria; <sup>3</sup>Karl-Franzens-University, Graz, Austria; <sup>4</sup>Centro Interdisciplinario de Neurociencia de Valparaíso, Facultad de Ciencias, Universidad de Valparaíso, Valparaíso, Chile

# These authors contributed equally to the paper

\* Corresponding authors: Francisco Bezanilla, fbezanilla@uchicago.edu; Peter Pohl, e-mail: peter.pohl@jku.at

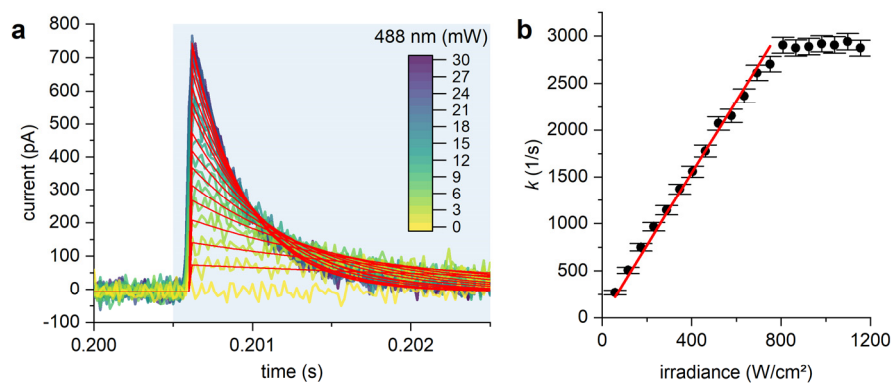

**Supplementary Fig. 1: Power-dependence of  $I_{\text{cap}}$  decay rate.** **a**, The power-dependent  $I_{\text{cap}}$  upon blue light exposure shown and described in Fig. 1e were fitted with a monoexponential decay model of the form:  $y(t)=y_0$  for  $t \leq 0.2006$  s and  $y(t)=A \times \exp(-(t-0.2006) \times k) + y_0$  for  $t > 0.2006$  s. A slight delay of  $\approx 100$   $\mu\text{s}$  was introduced between the onset of light exposure and the start of exponential fitting (0.2006 s) to avoid the initial rise of the current which is not fully resolved due to analog filtering. **b**, The apparent rates of decay from the exponential fits in **a**,  $k$ , are plotted over irradiance estimated from power at the sample stage divided by area calculated from  $1/e^2$ -diameter of the blue laser profile. The data is fit between 60 and 750  $\text{Wcm}^{-2}$  by a linear model of the form  $y(x)=a \times x$ , whereby  $a=3.85 \text{ cm}^2\text{W}^{-1}\text{s}^{-1}$  ( $R^2 > 0.99$ ).

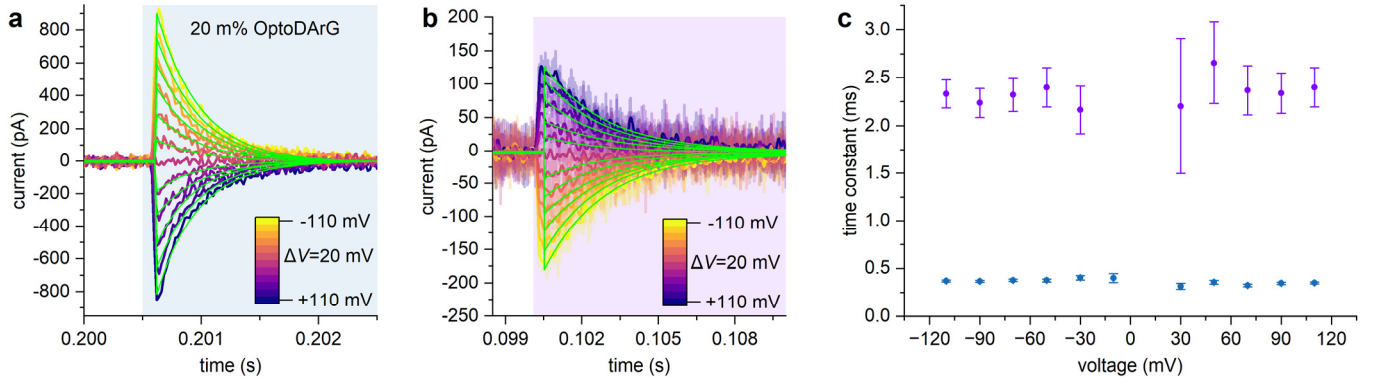

**Supplementary Fig. 2: The rate constants of  $I_{cap}$  decay are voltage-independent, in accordance with the theoretical prediction. **a,b**,  $I_{cap}$  shown in Figs. 1c and 1d were fit as described in Supplementary Fig. 1a. For UV light-evoked  $I_{cap}$ , the exponential decay was fit starting from 0.1005 s. **c**, The resulting time constants,  $1/k$ , are plotted over applied voltage. Purple points correspond to UV light-evoked  $I_{cap}$  (**a**), blue points to blue light-evoked  $I_{cap}$  (**b**). Differences in the decay rates are due to differences in irradiance (UV light irradiance was lower than blue light irradiance) and differences in photoisomerization rate for the cis to trans and trans to cis transition (Arya, Jelken et al. 2020). As expected from Eq. 7, the rate of decay does not depend appreciably on the applied voltage.**

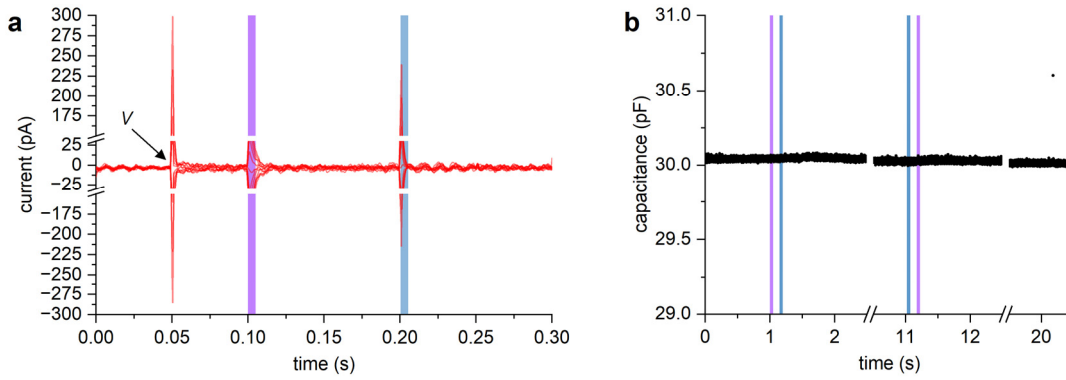

**Supplementary Fig. 3: Controls.** **a**, OptoDArG photoisomerization does not alter PLB conductance. The red traces are digitally filtered versions of the raw current traces from which Figs. 1c and 1d were prepared (the color coding according to power was omitted). As in Fig. 1, purple and blue background designate UV and blue light exposure, respectively. The arrow annotated *V* designates the application of voltage ranging from  $-110$  mV to  $+110$  mV with  $\Delta V=20$  mV, as described in the caption to Fig. 1; prior to 50 ms, *V* was 0 mV. Note that the voltage jump- and photoisomerization-evoked capacitive currents are truncated to allow for a more focused view of the baseline. **b**, In the absence of OptoDArG, capacitance does not change upon blue or UV light exposure. The recording was done as in Fig. 2a but on a PLB folded from 100% *E. coli* PLE.

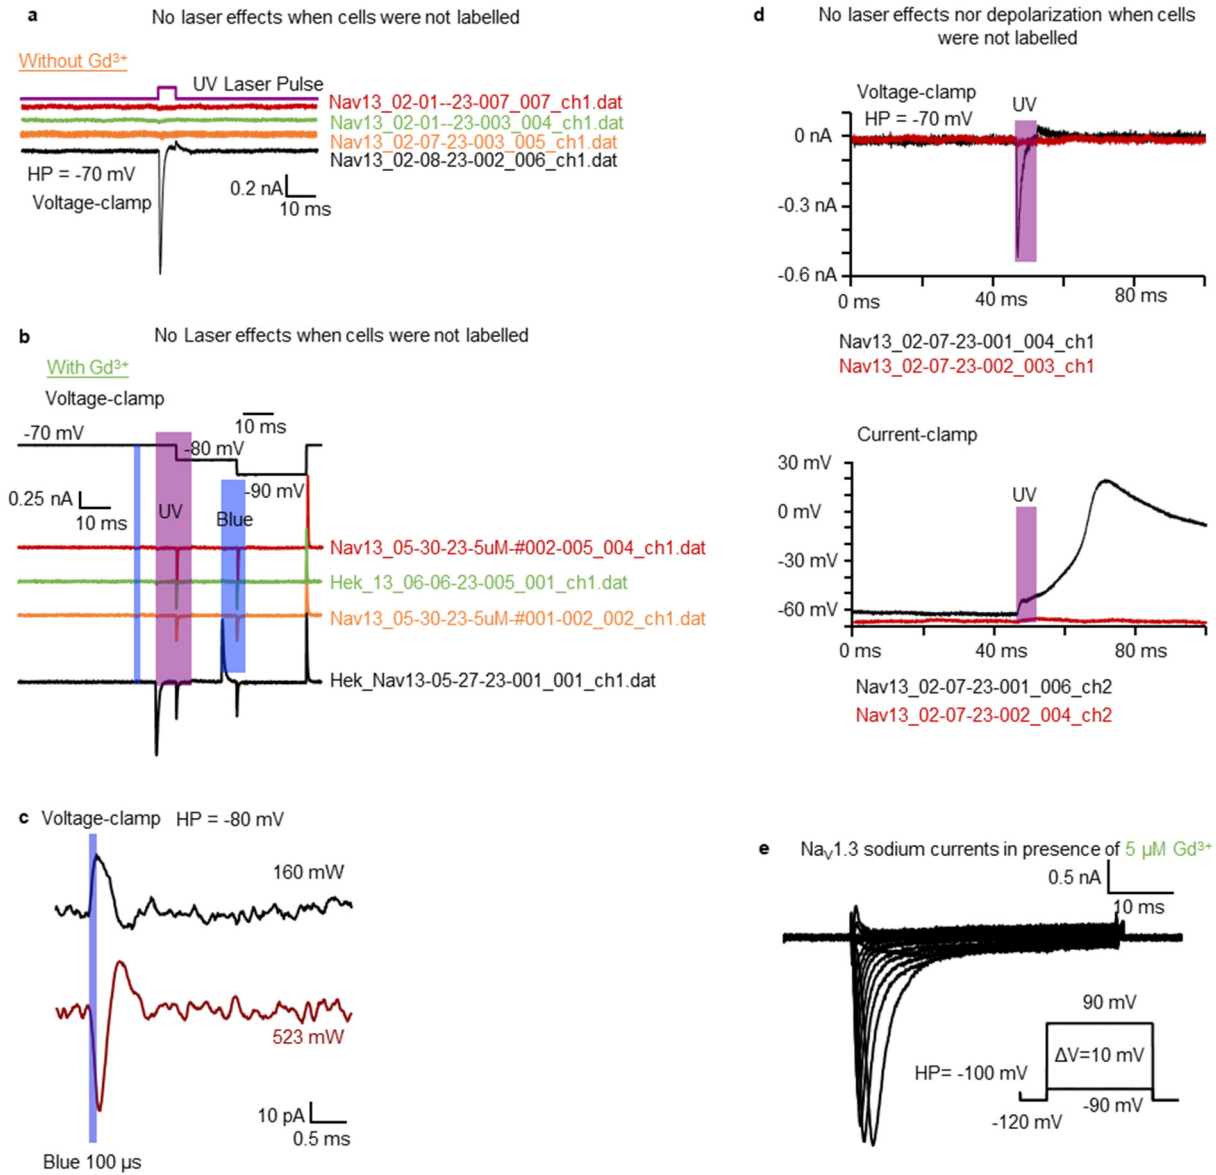

**Supplementary Fig. 4: No optocapacitive current is present when cells were not labeled with OptoDARG and 5  $\mu$ M  $Gd^{3+}$  does not affect  $Na^+$  currents through  $Na_v1.3$ .** **a**, Without OptoDARG labeling, no optocapacitive currents were induced by UV light exposure, indicating the absence of photothermal effects due to UV light itself. The red, green, and orange are representative current traces for cells that did not have OptoDARG, and the black for a cell that had OptoDARG for conditions in the absence (**a**) and in the presence of  $Gd^{3+}$  (**b**). In (**a**) the voltage was held at -70 mV and a single UV pulse was applied as indicated. In (**b**) the voltage protocol is inset at the top of the panel and the duration of exposure to laser light is shown by the rectangles. **c**, Thermal effects induced by blue laser when power exceeds 200 mW. The top trace (160 mW) shows light-induced capacitance changes by OptoDARG; the bottom trace (523 mW) displays the photothermal effect. Traces are from the same cell, and they were primed by UV prior to the indicated blue light exposure. **d**, No depolarization is observed when cells did not have OptoDARG incorporated. The red and black traces are recordings in voltage-clamp (top) and current-clamp (bottom) for cells in the absence and presence of OptoDARG, respectively. More details regarding the power used in our experiments can be found in Supplementary Table 1 and 2. The current and voltage-clamp experiments were from the same cell. **e**,  $Na^+$  currents elicited by the voltage protocol inset in **e**, and in presence of 5  $\mu$ M  $Gd^{3+}$ .

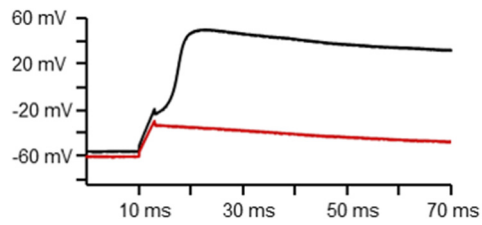

**Supplementary Fig. 5: Cells expressing Nav1.3 required large depolarization to elicit an AP.** The black trace represents an AP elicited by injecting current and the red trace failure to fire even though the depolarizations induced were similar. Both depolarizations were induced by injecting current.

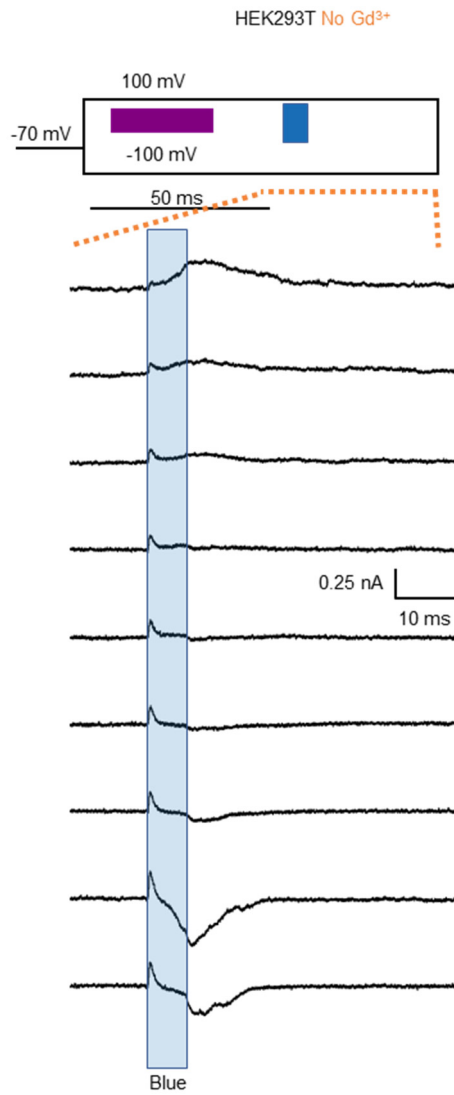

**Supplementary Fig. 6: Mechanosensitive currents evoked upon switching to trans-OptoDARG in blank HEK293T cells.** Currents were elicited using non-transfected (blank) HEK293T (ATCC - CRL-1573) cells at different voltage. A 30 ms UV laser pulse, indicated as a light blue square (30 mW), was applied before to prime the cis to trans transition induced by the blue laser (160 mW), indicated as blue square in the voltage protocol inset. The voltage protocol is illustrated in the inset and the time shown is indicated by orange dashed lines.

**Table1:** Success of AP generation in the absence of  $Gd^{3+}$  and labeling conditions.

| Recording file                        | peak current by UV<br>at -70 mV (nA) | laser power<br>(mW) |      | $\Delta V$ (mV) by UV | AP by UV  | labeling | $\Delta V$ (mV) by<br>injecting current |
|---------------------------------------|--------------------------------------|---------------------|------|-----------------------|-----------|----------|-----------------------------------------|
|                                       |                                      | UV                  | Blue |                       |           |          |                                         |
| Nav13_02-01--23-001_006_ch1.dat       | -0.218201                            | 100                 | 152  | 10.68                 | No        | Yes      | not measured                            |
| Nav13_02-01--23-003_004_ch1.dat       | -0.0427246                           | 100                 | 152  | not tried             | not tried | No       |                                         |
| Nav13_02-01--23-005_003_ch1.dat       | -0.108337                            | 100                 | 152  | 7.02                  | Yes       | Yes      | not measured                            |
| Nav13_02-01--23-006_002_ch1.dat       | -0.0869751                           | 100                 | 152  | 7.69                  | Yes       | Yes      | not measured                            |
| Nav13_02-01--23-007_007_ch1.dat       | -0.0442505                           | 100                 | 152  | not tried             | not tried | No       |                                         |
| Nav13_02-02-23-001_005_ch1.dat        | -1.10321                             | 80                  | 152  | 16.78                 | Yes       | Yes      | not measured                            |
| Nav13_02-02-23-002_005_ch1.dat        | -0.637817                            | 80                  | 152  | 14.95                 | No        | Yes      | not measured                            |
| Nav13_02-02-23-003_004_ch1.dat        | -0.552368                            | 80                  | 152  | 14.04                 | No        | Yes      | not measured                            |
| Nav13_02-07-23-001_005_ch1.dat        | -0.276184                            | 100                 | 152  | 7.93                  | No        | Yes      | not measured                            |
| Nav13_02-07-23-002_003_ch1.dat        | -0.0518799                           | 100                 | 152  | no depolarization     | No        | No       | 44.25                                   |
| Nav13_02-07-23-003_005_ch1.dat        | -0.0473022                           | 100                 | 152  | not tried             | not tried | No       |                                         |
| Nav13_02-07-23-004_003_ch1.dat        | -0.418091                            | 100                 | 152  | 7.32                  | No        | Yes      | not enough<br>sodium current            |
| Nav13_02-07-23-006_003_ch1.dat        | -0.131226                            | 100                 | 152  | not tried             | not tried | Yes      |                                         |
| Nav13_02-08-23-002_006_ch1.dat        | -0.917053                            | 100                 | 152  | 10.07                 | Yes       | Yes      | 21.97                                   |
| Nav13_02-08-23-001_003_ch1.dat        | -0.0198364                           | 100                 | 152  | not tried             | not tried | No       |                                         |
| HEK_Nav13_05-23-23-003_002_ch1.dat    | -0.561523                            | 98                  | 60   | 11.14                 | No        | Yes      | not measured                            |
| HEK_Nav13_05-25-23-#2-005_003_ch1.dat | -0.141907                            | 124                 | 60   | not tried             | not tried | little   |                                         |
| HEK_Nav13_05-25-23-#2-007_002_ch1.dat | -0.0762939                           | 124                 | 60   | not tried             | not tried | little   |                                         |
| HEK_Nav13_05-25-23-#2-008_002_ch1.dat | -0.177002                            | 124                 | 60   | not tried             | not tried | little   |                                         |
| HEK_Nav13_05-25-23-#3-010_003_ch1.dat | -0.288391                            | 124                 | 60   | 8.39                  | No        | Yes      | 31.01                                   |
| HEK_Nav13_05-25-23-002_006_ch1.dat    | -0.617981                            | 98                  | 60   | 15.01                 | No        | Yes      | not measured                            |
| HEK_Nav13_05-25-23-003_004_ch1.dat    | -0.128174                            | 124                 | 152  | not tried             | not tried | little   |                                         |



**Table 2:** Success of AP generation in the presence of Gd<sup>3+</sup> and labeling conditions.

| Recording file                                             | Gd <sup>3+</sup><br>( $\mu$ M) | peak current by UV<br>at -70 mV (nA) | laser power<br>(mW) |      | $\Delta V$ (mV)<br>by UV | AP by UV  | labeling | $\Delta V$ (mV) by<br>Injecting current |
|------------------------------------------------------------|--------------------------------|--------------------------------------|---------------------|------|--------------------------|-----------|----------|-----------------------------------------|
|                                                            |                                |                                      | UV                  | Blue |                          |           |          |                                         |
| Hek_Nav13-05-27-23-<br>#002_10uMGd-<br>013_005_ch1.dat     | 10                             | -0.695801                            | 120                 | 60   | 15                       | No        | Yes      | 30mV                                    |
| Hek_Nav13-05-27-23-<br>001_001_ch1.dat                     | 50                             | -1.9455                              | 124                 | 150  | 17.73                    | No        | Yes      | not measured                            |
| Hek_Nav13-05-27-23-<br>003_003_ch1.dat                     | 50                             | -0.58136                             | 98                  | 12   | 17                       | No        | Yes      | not measured                            |
| Hek_Nav13-05-27-23-<br>#002-20uM-<br>011_006_ch1.dat       | 20                             | -1.04218                             | 98                  | 60   | 18.98                    | No        | Yes      | 36.87                                   |
| Hek_Nav13-05-27-23-<br>20uM-008_002_ch1.dat                | 20                             | -0.398254                            | 124                 | 60   | 8.18                     | No        | Yes      | not measured                            |
| Hek_Nav13-05-27-23-<br>#002-20uM-<br>009_004_ch1.dat       | 20                             | -0.198364                            | 124                 | 60   | 6.81                     | No        | Yes      | not measured                            |
| Nav13_05-30-23-5uM-<br>#001-002_002_ch1.dat                | 5                              | -0.0137329                           | 124                 | 150  | not tried                | not tried | No       |                                         |
| Nav13_05-30-23-5uM-<br>#001-003_003_ch1.dat                | 5                              | -0.294495                            | 124                 | 150  | not tried                | not tried | Little   |                                         |
| Nav13_05-30-23-5uM-<br>#001-004_005_ch1.dat                | 5                              | -0.187683                            | 124                 | 150  | not tried                | not tried | No       |                                         |
| Nav13_05-30-23-5uM-<br>#002-005_004_ch1.dat                | 5                              | -0.0167847                           | 124                 | 150  | not tried                | not tried | No       |                                         |
| Nav13_05-30-23-5uM-<br>#002-006_003_ch1.dat                | 5                              | -0.0534058                           | 124                 | 150  | not tried                | not tried | No       |                                         |
| Nav13_05-30-23-5uM-<br>#002-009_004_ch1.dat                | 5                              | -0.0534058                           | 124                 | 150  | not tried                | not tried | little   |                                         |
| Nav13_05-30-23-5uM-<br>#003-010_002_ch1.dat                | 5                              | -0.125122                            | 98                  | 12   | not tried                | not tried | little   |                                         |
| Nav13_05-30-23-5uM-<br>#003-012_005_ch1.dat                | 5                              | -0.0778198                           | 120                 | 60   | not tried                | not tried | little   |                                         |
| Nav13_05-30-23-5uM-<br>#003-011_005_ch1.dat                | 5                              | -0.439453                            | 120                 | 60   | 6.21                     | No        | Yes      | not measured                            |
| Nav13_05-30-23-5uM-<br>#003-013_005_ch1.dat                | 5                              | -0.265503                            | 124                 | 150  | 5.83                     | No        | Yes      | 35.13                                   |
| Nav13_05-30-23-5uM-<br>#003-014_002_ch1.dat                | 5                              | -0.163269                            | 124                 | 150  | 3.78                     | No        | Yes      | not measured                            |
| Nav13_05-30-23-5uM-<br>#003-015_002_ch1.dat                | 5                              | -0.0732422                           | 124                 | 150  | not tried                | not tried | little   | 32.14                                   |
| Nav13_05-30-23-5uM-<br>#003-016_004_ch1.dat                | 5                              | -0.624084                            | 124                 | 150  | 12.56                    | No        | Yes      | not measured                            |
| Nav13_05-30-23-5uM-<br>017_003_ch2.dat                     | 5                              | not recorded                         | 124                 | 150  | 8.45                     | Yes       | Yes      | not measured                            |
| Hek_13_06-06-23-<br>001_004_ch1.dat                        | 10                             | -0.135803                            | 124                 | 150  | not tried                | not tried | little   |                                         |
| Hek_13_06-06-23-<br>007_002_ch1.dat                        | 10                             | -0.349426                            | 124                 | 150  | 6.4                      | No        | Yes      | 39.25                                   |
| Hek_13_06-06-23-<br>008_002_ch1.dat                        | 10                             | -0.500488                            | 124                 | 150  | 9.22                     | No        | Yes      | not measured                            |
| Hek_13_06-06-23-<br>003_002_ch1.dat                        | 10                             | -0.219727                            | 124                 | 150  | not tried                | not tried | No       |                                         |
| Hek_13_06-06-23-<br>005_001_ch1.dat                        | 10                             | -0.0198364                           | 124                 | 150  | not tried                | not tried | No       |                                         |
| Hek_13_06-07-23-<br>#Dish_2-010uM_GdCl-<br>005_003_ch1.dat | 10                             | -0.300598                            | 124                 | 150  | not tried                | not tried | little   |                                         |
| Hek_13_06-07-23-<br>001_005_ch1.dat                        | 10                             | -0.489807                            | 124                 | 12   | 3.78                     | No        | Yes      | 23.41                                   |

|                                         |    |           |     |     |           |           |     |              |
|-----------------------------------------|----|-----------|-----|-----|-----------|-----------|-----|--------------|
| Hek_13_06-07-23-002_002_ch1.dat         | 10 | -3.66211  | 124 | 150 | not tried | not tried | Yes |              |
| Hek_13_06-07-23-003_009_ch1.dat         | 10 | -0.668335 | 124 | 150 | 9.19      | Yes       | Yes | not measured |
| Hek_13_06-07-23-0015uM_GdCl_001_ch1.dat | 15 | -1.4267   | 124 | 150 | not tried | not tried | Yes |              |
