# Supplementary material for: Photolipid excitation triggers depolarizing optocapacitive currents and action potentials
Source: Nat Commun. 2024 Feb 7;15:1139. doi: 10.1038/s41467-024-45403-y (PMC10850502; doi:10.1038/s41467-024-45403-y)
Supplement: Supplementary file 3 — Supplementary Dataset 1 [file 41467_2024_45403_MOESM3_ESM.xlsx]

## Sheet: Fig1
panel c,d													panel e																						panel f
raw, unsmoothed current traces showing both UV and blue light-evoked optocapacitive currents; the current transient at 50 ms corresponds to the application of voltage (cf. Supplementary Fig. 3a)													raw, unsmoothed current traces showing both UV and blue light-evoked optocapacitive currents; the current transient at 50 ms corresponds to the application of voltage (cf. Supplementary Fig. 3a)																						10 m% OptoDArG														5 m% OptoDArG
voltage (mV):	+110	-110	+90	-90	+70	-70	+50	-50	+30	-30	+10	-10	power (mW):	30	28.5	27	25.5	24	22.5	21	19.5	18	16.5	15	13.5	12	10.5	9	7.5	6	4.5	3	1.5	0	raw, unsmoothed current traces showing both UV and blue light-evoked optocapacitive currents; the current transient at 50 ms corresponds to the application of voltage (cf. Supplementary Fig. 3a)														raw, unsmoothed current traces showing both UV and blue light-evoked optocapacitive currents; the current transient at 50 ms corresponds to the application of voltage (cf. Supplementary Fig. 3a)
time (s)	current (pA)	current (pA)	current (pA)	current (pA)	current (pA)	current (pA)	current (pA)	current (pA)	current (pA)	current (pA)	current (pA)	current (pA)	time (s)	current (pA)	current (pA)	current (pA)	current (pA)	current (pA)	current (pA)	current (pA)	current (pA)	current (pA)	current (pA)	current (pA)	current (pA)										voltage (mV):	+110	-110	+90	-90	+70	-70	+50	-50	+30	-30	+10	-10		voltage (mV):
0	-21.0938	-20.125	6.375	-22.4375	5.15625	-14.9375	-6.75	6.65625	-8.53125	9.9375	-22.125	-10.75	0	5.15625	-6.375	22.9375	-14.2812	-10.875	-14.4375	4.09375	-25.4062	-5	-16.5	-15.4375	8.6875	-21.8438	-12.0625	1.25	-0.96875	-31.5	6.21875	-18.9688	0.125	-18.8125	time (s)	current (pA)	current (pA)	current (pA)	current (pA)	current (pA)	current (pA)	current (pA)	current (pA)	current (pA)	current (pA)	current (pA)	current (pA)		time (s)
2e-05	3.59375	-6.65625	7.125	1.96875	-1.5	4.15625	29.3438	-20.875	-33.125	-17.7812	30.25	-33.5312	2e-05	21.4375	-2.875	15.7188	-3.375	-9.59375	19.7812	-10.6562	-8.125	8.46875	-19.625	-5.6875	-11.1562	5.4375	-13.1562	-16.4062	-6.28125	28.4062	-6.3125	12.4062	-5.6875	25.375	0	-9.25	3.21875	-12.0312	21.3438	19.1562	8.46875	-29.625	18.875	-0.09375	-11.75	-1.65625	-4.21875		0
4e-05	-7.1875	14.625	-1.25	-4.4375	12.0625	36.9375	-10.0938	-43.8125	23.8125	-15.1562	-6.96875	#VALUE!	4e-05	-15.4375	10.4688	-21.7812	-3.40625	-8.9375	33.1562	5.625	37.4375	2.09375	32.8438	10.1875	0.09375	12.0625	18.9062	8.71875	35.0312	-2.25	-24.5312	-14.5625	7.15625	21.5	2e-05	-21.4688	-7.6875	-5.28125	-20.875	11.5	2.75	-8.46875	-13.1875	16.1875	-34.75	-51.5312	0.0625		2e-05
6e-05	4.8125	-13.2812	-20.5938	-36.0938	13.7812	-26.3438	-32.25	13.3438	-3.59375	30.2188	-37.5	-0.875	6e-05	0.25	-15.4688	-17.9062	-27.125	-24.8438	-12.9375	15.0625	-13.7812	-14.25	-5.84375	-12.0312	18.3438	-3.71875	-21.0312	13.1875	20.7812	-44.0625	4.65625	-21	11.75	-32	4e-05	0.625	-15.1562	-10.125	-19.25	1.625	-7.40625	7.1875	1.625	27.1875	28.0312	26.375	3.09375		4e-05
8e-05	-1.5625	-12.125	-28.7188	-25.3438	-25.625	-16.4062	5.5625	7.9375	-46.5938	-4.84375	3	-2.5	8e-05	11.25	-21.4062	10.3125	0.375	-2.84375	13.0938	-20.0938	-10.2188	-8.71875	-30.7188	-19.7812	-6.34375	-19.6562	-9.34375	0.0625	-51.2812	8.65625	6.84375	-31.25	-2.125	-23.5312	6e-05	31	-0.6875	-33.3125	10.1562	-13.4375	-14.3125	-19.6875	4.96875	-0.96875	3.75	22.0625	-17.1875		6e-05
0.0001	-12.0625	4.9375	9.96875	22.625	2.90625	0.46875	1.59375	-24.1875	-7.59375	-39.5938	34.25	21.4375	0.0001	-31.4688	24.9062	-15.1875	-11.2188	-5.34375	7.75	-13.625	1.78125	-15.1562	-1.125	-42	2.4375	24.125	11.625	-56.1875	3.09375	-12.9062	-24.9062	5.84375	-11.75	18.9375	8e-05	-4.28125	5.5	11.0312	3.125	-4.71875	-5.15625	-12.875	-14.625	3.34375	-28.6875	-22.5	38.9062		8e-05
0.00012	-8.1875	-9.125	-18.25	-1.625	19.0312	-18.4062	-11.5312	-6.5	25.4062	-2.53125	-14.1562	32.625	0.00012	0.59375	-1.3125	-35.5625	-25.0938	0.15625	-6.6875	-4.125	-0.15625	-13.9688	1.90625	-26.8125	-34	-2.84375	-41.6562	1.9375	33.4375	-38.8125	-5.28125	6.5625	-19.125	-2	0.0001	-13.0312	-23.9062	-26.5938	18.4375	-9.5625	24.5625	22.1562	-11.3125	-5.0625	13.75	5.1875	9.84375		0.0001
0.00014	-5.28125	-6.5	-22.0625	-28	-47.4062	6.21875	-9.53125	44.9688	8.15625	29.4062	-14.5	22.4688	0.00014	12.5625	-41.9062	25.375	-6.25	-1.625	-6	5.34375	-35.5938	-5.625	-18.9062	20.3125	9.96875	-9.375	-1.21875	17.8438	-8.9375	-17.1562	30.75	3.34375	11.9062	-19.0312	0.00012	6.6875	-0.15625	18.0938	4.46875	-31.5938	5.53125	0.625	17.4375	-20.5625	5.03125	23.6562	-41.2812		0.00012
0.00016	8.0625	3.375	2.3125	27.8125	1.8125	8.71875	-5	-29.125	6.71875	-29.4062	9.0625	3.4375	0.00016	-6.15625	-2.90625	-19.6562	1.1875	-29.375	37.1875	4.84375	23.7188	-1.78125	-11.4375	2.59375	3.65625	23.625	20.5312	-22.5	-12.8125	17.5625	-22.25	13.4375	-16.75	14.2188	0.00014	24.4688	-7.25	18.3125	-29.9062	-4.65625	-7.5	-17.7188	-16.4375	-1.34375	-21.7812	-27.2188	-16		0.00014
0.00018	-7.9375	-17.6562	10.375	4.03125	45.2188	-36.5312	12.125	3.0625	14.4062	-1.96875	5.1875	-6.5	0.00018	-18.125	21.9062	-29.9688	-4.375	31	-6.78125	1.8125	5.84375	-0.84375	-3.5	-12.5312	-22.0312	-15.1562	-44.2812	25.7812	22.875	-7.03125	19.6875	-15.25	-10.25	14.9375	0.00016	-10.5	-13.6875	-9.25	4.53125	-4.21875	-19.6875	12.8125	-1.875	12.5	-19.9062	12.4688	11.6562		0.00016
0.0002	6.75	2.46875	-11.9688	-35.0625	-26	7.34375	-12.5938	15.1875	2.40625	30.875	-20.75	0.40625	0.0002	13.0312	-31.2188	17.8438	0.75	19.0938	-4.09375	-4.53125	-46.7812	-2.09375	-25.9375	23.125	5.5625	-17.5625	-11.875	7.5	-21.9375	-10.25	3.0625	-6.90625	15.5312	-18.375	0.00018	1.375	1.25	-30.7812	0.375	7.1875	-12.6562	10.7812	16.3438	-7.625	7.125	22.4062	-36.3438		0.00018
0.00022	-21.125	24.75	8.1875	26.0625	-32.7812	41.1875	-12.7188	-22.5938	-10.3125	-18.9375	-30.5312	11.5	0.00022	-11.2812	9.4375	-4.3125	33.5312	-24.1562	22.3438	-20.7188	-51	1.46875	3.0625	-20.4375	-6.59375	8.65625	-9.6875	-31.3438	-16.6562	33.1875	-9.25	-4.65625	-35.4062	40.0938	0.0002	-8.8125	-14.125	-0.125	-10.9062	-7.78125	15.625	-46.0312	-15.3438	-30.625	-26.5938	-35.3438	-4.21875		0.0002
0.00024	-28.9688	3.8125	27.6875	15.875	31.0312	-24.25	-7.9375	-6.46875	18.9688	-15.0625	7.4375	-36.6875	0.00024	-16.1875	8.625	-18.2812	-27.4375	7.71875	-7.53125	18.2188	20.4062	12.1875	15.9375	16.8125	-12.125	-9.8125	11.125	-16.3125	-7.375	-26.3125	9.9375	-18.4375	-21.625	17.0938	0.00022	-38.5938	-22.8438	8.84375	-27.2188	-15.2188	-7.78125	3.6875	-1.15625	11.2188	4.6875	-12.9688	22.4688		0.00022
0.00026	-1.5	-46.25	9.78125	-60.0938	29.0938	-12.7188	-17.0938	45.7188	-19.0312	21.0625	12.7812	-27.5312	0.00026	15.25	-14.75	16.75	-12.0938	8.0625	-30.3125	-12	7.375	-37.2812	-45.5938	1.84375	-10.875	-14.125	-20.625	-3.125	-28.2188	-11.2188	16.375	-1.34375	20.1875	-31.375	0.00024	12	28.9062	-17.375	-6.84375	8.71875	6.34375	11.1562	34.75	-4.65625	9.96875	20.6875	-10.9062		0.00024
0.00028	-6.09375	19.9062	-10	7.96875	-14.8438	22.3125	3.6875	-33.3438	3.84375	-15.0625	-6	7.71875	0.00028	-11.375	-6.59375	3.21875	15.7812	-11.75	19.6562	-38.6562	-21.2188	-3.0625	-24.3438	3.28125	-11.9375	-13.9062	16.1562	-8	-10.8125	31.875	-16.625	9.71875	-4.28125	12.9062	0.00026	-10.9375	-17.5312	11.0938	0.21875	0.15625	-2.25	-21.8438	-21.9688	-8.9375	-21.5938	-35.0625	-28.75		0.00026
0.0003	-64.0312	11.1875	2.84375	30.8438	4.375	-11.4062	18.6875	-30.8438	0.9375	-27.5625	-20.4688	20.75	0.0003	-23.0938	19.1875	-6.90625	-21.3125	-25.0312	25.0938	22.9375	14.25	15.2188	14.6562	-14.4375	-12.1562	-2.3125	5	20.3438	38	-12.4688	-26.4375	-0.5625	-11.7188	29.9688	0.00028	-17.0938	0.3125	-4.96875	-30.0312	8.8125	-8.5625	12.375	9.59375	5.15625	5.5625	-2.75	10.2812		0.00028
0.00032	-20.8125	-35.5	-30.4688	-35.5	-2.21875	-1	-8.4375	34.0625	-32.25	8.84375	1.1875	-24.3438	0.00032	7.375	-23.8438	-25	15.75	19.6875	-16.75	12.6562	-18.25	-27	-5.15625	-2.59375	24.5625	-18.0625	-9.25	3.25	13.9062	-3.375	-17	-23	11.4375	-10.8438	0.0003	16.7812	7.8125	5.1875	-2.21875	-40.9062	-6.75	24.0625	11.9688	-13.5312	-13	40.1562	0.46875		0.0003
0.00034	37.5	-27.1875	-13.3438	-18.9688	-13.1562	35.5938	-10.1562	20.7812	0.84375	10.0625	-4.75	-8.8125	0.00034	12.3125	-7.71875	-5.25	15.5	-8.53125	-26.4688	-28.875	-3.21875	-15.4688	-23.3125	-9.125	-3.40625	-13.5938	13.4688	-11.5312	-17.7188	26.6562	-16.375	-0.84375	6.8125	-1.625	0.00032	18.6875	-3.375	-6.03125	-24.25	-13.4688	-17.7812	-30.5	-38.0625	-25	20.2188	-5	-34.1562		0.00032
0.00036	-13.4062	17.3125	12.875	11.9062	-16	-17.4062	-3.8125	-60.9688	16.4062	2.25	-19.7188	31.4688	0.00036	-8.125	2.0625	-4.03125	-22.3125	-10.5625	-23.9375	18.75	-7.90625	10.8125	11.875	-15.2188	-29.2812	8.34375	9.1875	-16.5938	50.9375	10.3438	-25.0312	-2.65625	-14.9688	46	0.00034	-20.25	-18.625	-2.3125	10.6875	15.9688	34.5938	11.9375	-44.5	19.5312	10.0312	-8.625	34.2188		0.00034
0.00038	-32.8125	-6.375	-2.15625	-2.4375	-10.0625	-59.5938	11.3125	3.96875	-24.1562	2.15625	21.9062	-13.9688	0.00038	8.15625	-23.625	2.6875	-18.2812	25.4688	-20.9688	-12	0.53125	-29.9062	-19.5312	1.96875	23.5625	-13.5312	3	19.25	5.96875	-5.90625	10.4062	-4	15.9688	-26.5938	0.00036	-26.75	19.5	-29.0938	-1.75	-22	-6.125	-0.90625	-7.375	-14.7812	5.28125	10.0625	-0.1875		0.00036
0.0004	5.90625	-33.5312	-39.7188	-4.40625	-19.0312	23.4688	8.5	23.4062	-12.6562	7.40625	-40.7188	-9.65625	0.0004	-21.2812	-9.28125	3.5625	9.625	-20.9375	0.96875	8.46875	-14.6562	-19.2188	-20.9062	-12.3438	-5.46875	10.3438	-14.25	-12.7812	-26.25	35.6562	-4.3125	12.9062	-6.5625	-15.2188	0.00038	-5.15625	13.2812	40.2812	10.2188	16.5938	-35.4062	-6.34375	-13.9375	-64.6562	15.8125	0.6875	-56.75		0.00038
0.00042	20.9375	7.5	-7.28125	15.0312	-4.0625	-8.90625	-20.375	-48.2188	22.5	-34.2812	-26.875	-8	0.00042	-17.7812	-16.1875	-14.6875	-15.8438	-10.125	6.0625	3.09375	-9.28125	2.46875	10.3125	-12.625	-12	33.5312	5.03125	-14.7812	4.4375	17.4688	2.125	-9.5	-16.0312	28.3125	0.0004	-4.9375	-40.9062	-12.125	-17	9.96875	-4.9375	15.875	2.59375	10.5312	-10.3125	7.40625	30.2188		0.0004
0.00044	-28.75	-23.3438	35.0625	-18.5	-7.1875	-25.75	-8.0625	-0.5	17.3125	11.8125	9.65625	-22.3125	0.00044	20.9688	21.4062	-6.90625	-8.8125	4.09375	-40.0312	-4.1875	-11.3125	21.9688	17.5	-0.1875	34.25	-0.125	-11	14.0938	2.125	-16.2188	-19.875	-15.625	-5.625	-12.8125	0.00042	3.09375	2.46875	-17.1875	9.75	-20.2188	14.2188	-9	5.46875	21.0938	-35.7812	34.7812	36.7812		0.00042
0.00046	-8.03125	12.6562	-8.46875	20.1562	-4.0625	8.8125	-6.09375	18.875	-15.4688	23.4688	18.3125	0.75	0.00046	-13.0625	-6	0.28125	33.3438	-14.375	16.5312	-26.5625	-14.875	13.9375	-6.09375	-13.5938	-13.8438	-19.1562	-26.2188	-16.4375	-28.1562	14.6875	11.0938	-12.1562	2.1875	-46.7812	0.00044	1.5625	33.375	17.1562	11.4062	-4.34375	-20.1562	-32.1562	3	-4.15625	-6.84375	-30.4688	-16.1562		0.00044
0.00048	6.4375	24.2188	-28.3438	6.25	13.5625	-4.53125	-31.3125	-11.9062	30.8125	-39.25	10.4062	-10.2188	0.00048	-13.1875	12.9062	-15.5312	-24.25	-31.75	4.0625	-12.9062	2.96875	22.75	-9.46875	0.5	-35.3438	29.25	-9.0625	-23.7188	14.5625	10.5	-5.1875	8.1875	-17.1875	-14.0312	0.00046	5.65625	-14.5625	5.90625	-8.125	4.15625	-16.3438	30.25	-28.0312	-13.25	5.6875	-35.3125	-6.5625		0.00046
0.0005	-8.78125	-21.6562	16.6875	-26.125	-7.75	-37.1875	-26.5625	-24.0938	12.4062	-7.5625	15	-21	0.0005	22.4375	-7.34375	-9.53125	-14.4062	14.4688	-52.3125	-12.8438	7.71875	27.5312	-19.9688	-21.6875	-16.9688	-3.875	0.625	-8.96875	5.59375	-31.0312	-16.3438	-11.8125	-37.3438	24.8438	0.00048	-24.4062	-1.625	-13.2188	0.59375	-16.25	14.4062	-9.28125	2.4375	1.1875	-13.3438	29.75	20.5938		0.00048
0.00052	-32.4062	-8.625	-24.0312	-8.5625	-9.90625	17.6562	-10.5312	1.59375	-22.0312	19.4375	16.4688	-5.59375	0.00052	2.1875	-12.6875	18.5	16.3438	15.125	-3	-37.0625	-25.1562	3.5625	6.5625	8.28125	-11.0312	-24.5312	-32.125	9.3125	-11.3125	11.375	1.40625	-16.7188	7.59375	-34.7812	0.0005	4.1875	43.0625	-30.2188	-5.1875	-7.28125	-13.7812	-5.625	3.1875	-6.90625	6.0625	-3.875	-11.5312		0.0005
0.00054	-18.4688	12.9062	-6.5	-0.78125	36	27.1875	7.21875	16.2188	-8.6875	-32.8125	5.40625	1.21875	0.00054	-18.5	12.0938	4.28125	-17	-21.0312	31.9688	-21.7188	-5.90625	25.9688	21.0625	-22.25	-21.8438	18.375	-3.9375	-19.3125	-25.1562	12.5938	-6.96875	3.03125	10.625	8.1875	0.00052	40.5938	-23.0938	1.40625	-24.8438	3.84375	19.8438	9.875	-8.28125	-6.40625	9.0625	-21.8125	-23.4375		0.00052
0.00056	-1.8125	-4.40625	1.25	-24.0312	18.375	-20.5	-3.46875	-33.7188	-0.84375	-20.2188	17.625	0.96875	0.00056	5.75	-9.5	18.2188	-3.9375	-5.625	-21.9375	15.2188	16.375	8.96875	-14.25	-23.5312	12.5625	19.5625	15.9688	-22.2812	12.3438	-17	3.21875	-15	-1	31.6875	0.00054	-4.5625	-17	-1.28125	16.7188	48.4688	19.3125	-6.40625	3.40625	0.3125	-4.5	-0.28125	8.6875		0.00054
0.00058	-11.875	-2.90625	-10.5625	20.2812	-10.7188	-6.28125	30.9688	-8.34375	0.46875	22.8438	3.3125	5.59375	0.00058	-9.9375	-24.125	33.9688	22.6875	8.34375	-15.0938	-0.40625	-13.7812	-11.1562	-36.1562	2.53125	10.7188	0.9375	-30.3125	21.4688	-1.21875	-4.90625	-16	-19.6562	-2.9375	-25	0.00056	-22.7812	14.5938	-18.9688	-21.9062	10.75	5.5625	-44.8438	40.7812	11.4688	-17.5	-3.78125	-16.8438		0.00056
0.0006	7.1875	-11.5938	-11.4688	13.375	42.125	-17.5625	-31.2188	-29.5625	-4.71875	12.875	2.03125	11.3438	0.0006	-45.7812	-3.90625	4.8125	5.21875	-26.7188	-5.65625	13.9375	-18.8438	-2.28125	42.9375	6.3125	-8.8125	-23.0312	-11	6.9375	-20.6562	12.9062	1.96875	10.375	-4.1875	-3.09375	0.00058	2.28125	-10.4062	11.3438	-18.375	-3.46875	-18	32.7188	-47.125	11.5	-7.375	-19.75	-7.15625		0.00058
0.00062	-24.3125	-3.5625	-13.8125	-16.2188	26.75	-48.3125	9.65625	3.59375	23.2812	6.4375	24.25	-1.625	0.00062	8.9375	21.4375	-30.3438	21.5	-14.25	-37.2188	12.0938	33.375	7.65625	22.5312	-30.125	-3.96875	13.4688	13.6562	-15.8438	6.34375	-30.6562	21.25	31.5625	-22.3125	30.8125	0.0006	9.15625	-9.84375	-20.625	13.4688	3	4.09375	6.0625	11.7812	-3.90625	0.09375	5.5625	1.3125		0.0006
0.00064	-0.6875	4.59375	-53.2188	-31.4375	-10.1562	21.6562	8.75	27.3125	-22	-11.2812	-7.6875	-0.59375	0.00064	-1.28125	-27.6875	-9.1875	34.5	23.3125	18.1875	-4.59375	2.40625	-21.5312	-41.2188	7.8125	-4.25	12.1875	-3.0625	13.4375	-1.71875	-22.9062	-7.78125	-1.1875	-3.4375	-10.6875	0.00062	-23.7188	-20.875	-16	0.8125	-0.3125	-3.8125	-43.75	13.8438	-4.25	6.25	-14.4375	-20.625		0.00062
0.00066	20.0625	-4.375	8.5	21	6.9375	26.0938	2.53125	-17.125	5.21875	-17.5938	-7.4375	6.0625	0.00066	-36.875	-23.8438	36.0625	-24.25	-13.8125	20.2812	-27.5625	-17.9688	-52	2.21875	12.0625	-6.3125	1.8125	-3.3125	6.3125	-25.9062	-18.4688	-17.875	25.5312	12.125	-23.0312	0.00064	-9.59375	-18.5938	-8.25	-2.96875	0.21875	-3.25	1.8125	2.6875	9.21875	-10.2188	-29.4688	12.3125		0.00064
0.00068	-31.375	-27.5312	-4.90625	-3.6875	30.0625	-38.5938	-21.2188	23.2812	12.1562	-18.625	-3.09375	9.6875	0.00068	34.8438	25.9688	4.8125	-27.625	-1.65625	-24.0938	-3.46875	18.8125	-1.46875	6.6875	-12	-27.125	-8	11.8438	-15.6562	17.4375	-5.84375	4.71875	15.0625	5.96875	-5.3125	0.00066	18.1562	-12.3438	-12.9688	-1.375	-3.71875	-3.71875	53.0625	-0.9375	-15.25	-23.4062	27.4062	9.21875		0.00066
0.0007	-13.8438	12.3125	-15.375	-11.5625	-27.9062	-22.9062	-20.7812	6.75	-24.5625	2.46875	-13.0312	14.2188	0.0007	-0.5	-22.0625	6.4375	18.2188	15.7812	18.9375	17.375	-6.78125	12.9375	-22.0312	27.9062	10.8438	-0.375	-22.6562	-10.2188	2.96875	-7	14.9062	-5.6875	0.9375	-2.59375	0.00068	-11.7188	18.6562	1.5625	-13.5	-15.5312	7.59375	-13.7812	19.6875	28.7188	20.2188	-2.25	-8.34375		0.00068
0.00072	0.625	-8.78125	-15.7188	21.6875	-38.5938	0.71875	26.6875	-21.7188	-4.125	10.1562	20.7188	5.9375	0.00072	-43.25	31.375	0.46875	-4.34375	-2.25	13.9062	-1	-21.25	5.125	-20.0312	-1.09375	-3.75	-24.9062	-39.8125	-5.875	-16	-11.5312	-4.40625	6.4375	5.125	-35.75	0.0007	-6.4375	-5.8125	-1.59375	-10.8125	-0.8125	-15.7188	-12.0625	-40.25	-19.7812	-6.5625	-22.1875	16.125		0.0007
0.00074	-14.7188	-9.5625	10.625	-10.75	25.5312	-19.375	-35.4062	-0.3125	29.0625	-11.0625	-20.2188	-17.7812	0.00074	-3.78125	-8.625	-12.4062	0.65625	-2.5	-18.7188	14.5625	-0.375	4.21875	17.4375	-10.1562	-20.3125	20.9062	-29.5312	-3.125	-17.4062	-3.3125	-3.71875	7.78125	-4.15625	-0.3125	0.00072	-1.375	12.3438	15.3438	14.4375	-16.5625	-11.5938	-7.5	-13.8438	1.6875	-18.9062	-17.6562	17.3125		0.00072
0.00076	-3.78125	-6.6875	-1.09375	-29.9062	-6.625	-18.8125	0.59375	24.625	-22.0312	-4.4375	-39.8438	-33.4062	0.00076	42.375	-5.875	-49.9688	26.1562	10.875	9.34375	-20.3125	-45.4688	-21.6875	-31.5312	13.625	5.40625	9.8125	-21.2812	14	-23.125	6.4375	12.7188	-2.6875	-2.875	7.1875	0.00074	8.15625	3.78125	-13.9375	-10.625	15.375	0.625	-19.875	3.90625	-14.2812	7.90625	-13.125	-32.75		0.00074
0.00078	15.625	7.8125	-15.7188	4.8125	-6.4375	27.0625	12.0625	-29.2188	-29	-25.0312	-9.46875	-10.8438	0.00078	-33.9375	-2.90625	-12.4062	-10.5625	-10	2.9375	-11.5625	5.1875	-48.4375	-10.75	4.875	-21.5938	-46.4062	14.125	3.21875	-12.3438	4.8125	-38.6562	-18.5	5.75	-28.625	0.00076	-20.9062	-3.78125	13.3125	-14.5312	-6.90625	2.90625	-5.8125	9.59375	-12.2812	13.25	-43.5312	-42.25		0.00076
0.0008	0.65625	6	-19.2188	8.71875	25.0938	2.5625	-4.4375	-10.4688	25.5625	-28.9062	3.25	-24.7812	0.0008	-11.125	25	37.1875	-4.46875	-37.8438	-18.375	-15.9062	23.7812	-14.4375	0.15625	-18.25	-29.5938	8.96875	28.4062	-48.5938	-27.8438	-18.4062	-15.4688	18.4375	-0.3125	-8.46875	0.00078	0.65625	-5.21875	-2	26.7188	-8.96875	-7.5	37.5	-14.125	-8.75	-39.6875	5.9375	20.125		0.00078
0.00082	-29.5	-8.40625	-30.75	-17.625	-14.5938	-5.9375	-6.34375	28.0625	-21.1562	24	-17.7188	-6.84375	0.00082	37.8125	-15.7188	-19.5312	5.15625	23.1875	-31.5625	-5.1875	-11.0312	25.1875	-25.9375	-0.125	15.6875	-8.25	33.9062	3.21875	-28.625	-11.6562	14.8438	-14	-10.5312	13.7188	0.0008	6.625	-7.53125	27	0.71875	-34.3125	-32.2812	7.375	23.9375	5.0625	-30.75	35.7812	-20.4375		0.0008
0.00084	12.8438	10.75	5.21875	2.53125	-16.7812	12.5312	2.71875	-48.9375	-45.9062	1.5	-15.5625	-19.0312	0.00084	-46.2812	-10.6562	-8.84375	19.125	17.125	51.4375	-11.8438	1.78125	-24.5938	-19.1875	-0.4375	-14.875	-11.3125	52.8125	0.53125	20.6562	7.71875	14.5938	-11.1875	-12.625	-6.9375	0.00082	-28.625	30.0312	-9.40625	-34	1.96875	6.84375	-36.1875	-11.2812	18.7188	4.3125	-6.46875	-14.0312		0.00082
0.00086	-16	-17.125	-2.875	4.1875	11.0312	-20.875	1.59375	-40.625	-14.8125	-17.7812	-26.4375	-17.0625	0.00086	-26.625	23.5	17.5312	-38.5938	-39.25	-22.3438	23.6875	-21.8125	-18.625	19.875	-32.7812	-13.7188	-5.28125	33.0312	-24.25	-17.5625	1.40625	-2.3125	28.1562	5.90625	19.4688	0.00084	-14.7188	0.75	-27.0312	-21.3125	5.75	21.1562	27.2812	-33.9688	-25.0938	1.28125	1.125	31.2188		0.00084
0.00088	-56.8438	-25.4375	-42.6562	-58.1875	-16.9688	-3.3125	-33	31.9688	-16	5.84375	-9.4375	-17.125	0.00088	27.3438	-29.4062	-4.71875	8.125	-7.46875	-50.375	33.5	3.8125	-20.125	-9.65625	-15.9688	7.25	-28.3438	12.9062	9.59375	-6.40625	-15.5625	-6.96875	-15.375	-4.96875	-26.5938	0.00086	-13.5625	7.75	-3.4375	24.0938	-18.25	-18.7812	41.6562	-0.875	20.7188	-17.5938	-12	-9.5625		0.00086
0.0009	9.59375	0.375	-22.3438	-2.625	-23.5938	-0.25	5.3125	-10.5625	-24.125	5.21875	-3.375	-5.875	0.0009	-32.7812	-10.9688	-14.125	6.9375	-22.375	1.3125	27.5625	2.03125	-7.78125	-24.8125	4.65625	22.2812	-16.125	-14.5	2.90625	26.7812	19.1875	-42.7812	-42.1562	-0.28125	-9.40625	0.00088	18.3438	-42	-13	-13.1875	-2.625	-7.375	-17.7812	-1.78125	-13.5312	13.1875	-23.875	-20.7188		0.00088
0.00092	2.4375	-13.8125	-12.4688	23.8438	-20.4688	-22.25	9.15625	-30.875	7.875	-14.375	-15.2188	22.75	0.00092	-28.3438	-9.78125	-3.125	-49.3438	-19.2188	-16.5	15.4062	10.3438	-6.09375	6.5	-10.2188	-5.96875	-39.9375	17.5312	-16.0625	-4.21875	-3.96875	-24.4375	-8.84375	2.65625	-9.90625	0.0009	-12.7812	-13.625	-3.34375	4.03125	4.65625	14.7812	-40.8125	5.21875	-25.1875	-12.375	-6.46875	14.0312		0.0009
0.00094	-13.8438	-24.25	-14.0625	-13.0938	-9.03125	-12.6875	-38.1562	34.875	-11.9062	7.59375	-20.25	-10.3125	0.00094	49.4062	-8.71875	24.8125	-1.375	20.8125	-36.3125	6.875	-10.875	1.84375	-9.90625	-23.1562	7.375	2.875	-15.4375	-6.4375	-30.5	-31.0312	-3.9375	24.9375	5.8125	4.0625	0.00092	-6.25	5.84375	0.6875	-1.8125	-9.53125	14.0312	-11.5625	15.1562	5.84375	5.875	27.5312	3.21875		0.00092
0.00096	6.625	-13.2188	-7.65625	4.21875	-8.875	12.2188	-11.5312	29.375	-7.40625	28.25	1.90625	-13.3125	0.00096	27.9375	17.6562	-30.9062	5.84375	12.5625	-6.0625	6.09375	-21.7812	-13.5	-22.3125	17.1562	21.75	4.28125	-37.9375	-3.6875	3.96875	-5.8125	27.4062	-36.25	-18	-3.03125	0.00094	9.96875	-17	32.125	6.15625	18.9375	-17.9062	10.6562	3.3125	19.5	13.5	-1.375	-24.5625		0.00094
0.00098	8.21875	32.4688	-0.90625	0.3125	-15.25	-6.90625	3.34375	-47.7812	30.3125	-27.2188	29.625	21.0938	0.00098	-13.5938	9.75	3.84375	-9.6875	-35.2188	24.9688	-20.125	-1.125	-13.7812	13.2188	2.46875	-29.25	8.3125	3.59375	12.6562	15.75	-21.5	-9.34375	-2.53125	-1.09375	7.375	0.00096	9.1875	-11.0625	-19.625	-4.8125	1.84375	-38.8125	-1.5625	5.90625	-38.875	9.875	-34.3125	10.1875		0.00096
0.001	-2.28125	-22.7188	-4.78125	-5.15625	-12.25	-32.3125	-8.25	-33	-26.5312	0.9375	-24.3438	-19.2188	0.001	41.9375	-22.9062	17.4375	-12.375	4.1875	-20.875	-5.375	11.4688	23.0938	3.96875	-6.78125	-3.96875	-5.5	2.6875	-12.6875	-8.03125	1.75	-21.375	31.9688	-11.75	-4.28125	0.00098	-8.78125	-1.96875	-20.5312	-4.125	-27.625	22.6562	-7.03125	20.0625	-9.46875	-17.1875	22.5312	-5.78125		0.00098
0.00102	-10.0938	-15.25	-4.84375	-20.2188	0.59375	-13.8125	-42.0625	27.6875	-17.2188	11.1562	-45.7812	7.84375	0.00102	15.375	2.8125	-39.4688	12.0625	-5	-8.84375	-3.84375	-37.4688	-1.5625	-12.8438	-5.25	11.875	-32.2188	-44.4062	-19.3438	-9.875	9.53125	20.5	-25.2188	-9.375	-17.25	0.001	1.8125	-16.0938	0.625	25.5938	2.625	-5.4375	1.21875	1.4375	-17.5312	-9.8125	-18.5	8.09375		0.001
0.00104	-13.3125	33.125	-8.65625	16.4375	3.53125	-15.7812	15.9375	2.28125	6.78125	-31.9062	20.9062	-4.40625	0.00104	-17.5938	41.5625	-52.125	-18.2188	22.125	25.1875	-1.0625	-5	-1.75	-5.21875	20.4062	-17.625	19.3438	-2.09375	18.5312	28.0938	-5.875	0.75	3.90625	-30.5	-9.15625	0.00102	14	36.8125	4.6875	-8.90625	36.25	-2.90625	10.25	-1.9375	-0.4375	-8.9375	-20.75	15.5		0.00102
0.00106	-20.375	-14.1875	1.15625	13.75	-2.40625	22.5938	12.75	10.2188	1.1875	-5.46875	9.71875	-10.4688	0.00106	23.4375	-28.1562	9.75	-30.25	28.9688	-26.0938	-5.125	17.4688	16.5625	2.625	-22.2812	-2.40625	9.1875	9.09375	-32.4688	-13.9688	2.65625	-1.78125	4.21875	35.0938	-14.4375	0.00104	-18.5	3.3125	-20.7188	-8.15625	-31.375	6	-13.7812	26.375	21.5625	-17	33.8125	-17.5312		0.00104
0.00108	-14.3125	-11.2188	-26.8438	-34.3125	7.21875	13.3125	-2.25	8.46875	9.84375	37.4688	-19.125	7.6875	0.00108	14.75	-22.6875	1.84375	3.65625	5.34375	-12.1875	-23.875	-18.4688	-12.625	-42.0625	-12.75	-8.25	-25	-34.1875	-6.9375	-18.8438	-5.40625	26.5938	-42.3125	-23.3438	-3.9375	0.00106	6.21875	10.625	-12.125	-4.21875	-35.7812	-3.375	-3.3125	-25.1875	16.6562	2.8125	-26.375	-29.8125		0.00106
0.0011	-7.1875	5.875	11.5312	20.9688	10.3438	-2	-18.6562	-1.09375	-2.78125	-29.375	-6.34375	15.4062	0.0011	-46.7188	47.8125	-6.96875	-23.5312	-24.9688	19.8125	2.78125	11.125	-27.0625	42.3125	-22.2188	-14.5	-8.5	-26.9375	13.4375	28.0625	-2	-14.9062	-7.125	-18.9688	4.625	0.00108	31.2188	-14.125	7.0625	34.2188	4.625	13.7812	1.125	-22.5625	-19.8125	-16	-37.9062	13.4688		0.00108
0.00112	9.3125	7.15625	-2.90625	-7.375	-11.9375	-27.0312	20.2812	-11.2812	-23.2188	7.90625	35.0938	24.125	0.00112	17.9062	-32.6562	-1.90625	-8.5625	8.6875	-35.0312	13.1875	17.5625	7.34375	0.625	19.9375	-7.34375	8.75	38.5938	0.65625	-8.53125	-29.625	-11.3438	16.7812	1.65625	-18.2188	0.0011	-45.4375	-2.84375	-27	-23.3125	11.5938	-0.21875	-19.75	17.5938	-1.75	-6.3125	1.75	8.75		0.0011
0.00114	-20.9375	-39.3125	-19.75	-11.0625	-9.125	-6.6875	1.875	13.1875	12.7188	22.75	-9.875	17.9062	0.00114	14.6875	-37.5938	-1.96875	-21.5625	24.75	-4.53125	-15.4688	-11.3438	-7.71875	-38.0312	4.90625	-7.9375	-10.0625	-19.625	3.28125	-13.6562	-8.8125	4.40625	-41.875	14.4688	-15.7188	0.00112	-14.8438	0.1875	4.34375	-19.25	-13	-55.2812	-5.15625	-4	12.0625	4.28125	18.375	-2.03125		0.00112
0.00116	-8.84375	16.875	-5.46875	14.2188	24.625	16.75	-29.25	16.25	2.65625	-8.65625	-7.40625	13.9688	0.00116	-16	17.8125	-15	14.1562	-47.1562	28.4062	5.40625	-9.40625	-14.0312	-3.28125	-14.1562	-5.34375	3.71875	-33.5938	-6.875	8.28125	-21.5938	-9.875	-26.5	-17.5938	3.8125	0.00114	22.25	-14.0312	16.4688	16.125	4.03125	12.625	26.6562	5.875	-34.625	-0.71875	-32.0312	-7.25		0.00114
0.00118	-12.4375	-2.78125	-5.59375	-8.40625	-15.7812	-19.0625	15.4688	2.8125	-11.625	-20.5625	-6.90625	25.75	0.00118	-23.5	-13.9062	8.9375	-21.5938	42.0938	4.21875	1.59375	28.4062	-2.28125	7.5625	-1.6875	-2.34375	36.2188	12.5938	22.25	-11.5938	-7.5625	-4.9375	46.5	0.59375	2.21875	0.00116	-9.1875	-35.8438	-11.8438	-8.8125	-17.2812	20.375	-8	-38.125	12.6875	3.4375	15.5938	13.5		0.00116
0.0012	-11.125	-36.6562	-24	-27.6875	-13.625	-3.25	15.4375	26.4062	-25.625	-3.3125	1.09375	-0.40625	0.0012	13.3125	-43.0312	-0.46875	-0.21875	43.0938	-17.5625	-10.8125	-25.9062	-38.4688	-9.125	3.53125	40.375	-31.5938	-1.90625	-13.0625	-22.4062	10.1875	-15.625	-6.96875	39.6875	-14.3125	0.00118	-14.125	-1.40625	9.53125	-46.4688	17.0938	-21.125	-7.3125	-0.28125	-4.25	16.3438	-8.90625	-26.5		0.00118
0.00122	16.5312	36.5	-8.25	14.0312	5.15625	-10.1875	-4.625	-30.2188	1.96875	-2	-41.5938	20.8438	0.00122	-34.2188	29.9688	-21.375	13.4688	-32.5	13.7188	12.8438	-16.625	11.375	-8.25	-1	33.3438	-32.5	-13.2188	-12.8438	12.1562	-3.53125	-3.4375	-23.7812	-28.75	20.5625	0.0012	13.1875	-21.5312	7.78125	6.5625	3.09375	6.09375	-10.7812	0.53125	-23.8438	-37.875	-34.0312	-5.90625		0.0012
0.00124	-18.5938	-24.875	10.9688	-20.5	-12.5938	-10.1875	-8	14.1875	3.3125	-21.6875	-3.40625	-4.21875	0.00124	-21.7188	9.4375	-5.28125	-40.5	15.0938	-24.3438	12.0625	24.9062	-6.65625	4.90625	3.5	-9.65625	24.9062	12.75	-1.0625	-10.5	-2.96875	2.21875	1.59375	-6.3125	-22.5	0.00122	-5.34375	-8.25	-25	18.8438	-23.4375	-1.34375	-18.75	-4.25	-8.40625	-2.90625	0.3125	-24.5312		0.00122
0.00126	-0.46875	4.21875	-34.75	12.25	-33.3125	-36.125	8.28125	-5.1875	-29.8125	9.21875	-11.6562	2.84375	0.00126	26.2188	-45.0312	-3.3125	3.25	37.2812	-15.6562	-37.0625	-4.1875	-32.5625	-12.0625	22.9062	8.5625	-6.125	-3.96875	-13.7188	-12.4688	3.1875	5.65625	22.3438	24.2188	-33.5938	0.00124	7.46875	1.75	-5.78125	-27.7812	-16.8438	-38.3438	-11.5625	8.6875	-2.625	24.4375	38.1562	10.9375		0.00124
0.00128	12.9062	7.125	-15.9375	24.5312	10.2188	2.90625	-37.3125	-36.3125	-4.875	-2.6875	-21.4062	-17.9688	0.00128	-12.75	10.75	-25.375	19.3438	-32.2188	18.9062	-28.4688	-30.25	1.4375	-15.4688	7.75	14.0938	-21.4375	-12.1562	-11.1562	-16.625	24.0938	20.4688	-27.5312	-33	19.625	0.00126	9.5	-6.5	3.96875	-2.4375	5.96875	-13.1875	-11.75	1.5625	-29.8438	16.3438	-6.625	-21.2188		0.00126
0.0013	-26.1875	-6.25	14.1562	-15.9062	-2.375	-21.9688	-42.8438	3.96875	-8.71875	-31.9375	1.90625	-22.1875	0.0013	-8.5	28.1875	13.3438	-14.8125	-19.125	-17.2812	27.5312	31.75	10.4062	-7.09375	-13	-10.9375	-7.71875	-15.5625	2.59375	-0.90625	-4.8125	1.15625	8.59375	-13.2812	-28.2188	0.00128	-18.2812	-19.1875	-0.125	-5.5	-37.8125	10.9375	-8	11.2188	27.2812	-31.625	-5.78125	30.0625		0.00128
0.00132	3.96875	-12.25	-17.3438	-21.1875	-17.7188	-6.15625	6.3125	3.125	-20.1875	-2.875	-8.625	-3.03125	0.00132	-0.8125	-29.3125	23.0625	6.3125	43.8125	-23.4062	-25.9375	-18.2812	-7.46875	2.65625	8.5	7.625	-10.9062	13.1875	-22.1562	-25.75	6.875	-5	25.8438	12.9375	-30.125	0.0013	-19.4062	21.1875	3.375	-13.6562	-9.09375	-33.75	-8.5	-21.7188	11.3125	-0.0625	8.25	4.65625		0.0013
0.00134	10.5312	0.28125	-1.34375	10.1875	-5.03125	28.125	-1.125	-36.6562	-27	-13.5312	3.96875	-31.4688	0.00134	-24.625	7.25	-22.7812	15.7812	-23.5	-0.3125	-17	-30.4375	-4.28125	-21.1562	-20.1562	-19.9062	-34.7812	-42.5	-33.7188	-36.5	-25	-1.65625	-40.125	-1.65625	8.625	0.00132	4.375	25.6562	45.125	11.6875	8.15625	-2.28125	8.71875	-48.5938	-25.4688	24.7812	19.125	-30		0.00132
0.00136	-33.1562	-27.4688	17.9062	-30.2188	-4.59375	-4.625	-36.9062	-8.71875	17.5312	-13.4375	-20.125	-17	0.00136	12.3125	4.78125	12.7188	-21.6562	-46.625	2.9375	20.5312	-12.0938	27.2188	-2.5	1.5	-30.4375	-0.25	-23.5938	6.84375	14.3438	18.7812	-24.9062	10.4688	-25	11.1562	0.00134	-4.78125	17.25	1.71875	34.0938	-5	26.5	2.90625	-3.09375	17.9375	-44.0625	-19.6562	-0.09375		0.00134
0.00138	-31.0938	-5.65625	-19.125	-25.375	-28.9375	-19.375	19.4375	14.1562	-1.84375	0	-8.28125	1.09375	0.00138	-2.25	-27.0625	-14.9062	-18.25	16.75	1.96875	-36.9062	-0.21875	-25.3125	-5.90625	2.65625	7.09375	27.2812	20.5	4.8125	-6.125	-16.8125	-17.75	13.125	1.65625	-42.4375	0.00136	-9.96875	34.0938	-18.9062	-29.2188	-1.96875	-20	-10.5	-6.78125	6.875	-0.96875	-9.3125	-30.875		0.00136
0.0014	-4.8125	35.9375	-18.9062	5.4375	3.1875	56.375	11.9375	-41.7812	-47.0938	10.4688	19.2188	12.0312	0.0014	-45.125	3.65625	-21.6875	25.1875	-36.4688	-3.03125	-13.1875	-17.0312	-20.7188	-26.6562	-12.6875	15.125	-22.4062	-13.125	-5.59375	-26.7812	-7.71875	-10.25	-39.125	-0.875	-12.4688	0.00138	6.96875	9.6875	3.9375	17.75	-7.46875	12.0312	-3.8125	10.7188	-35.875	21.5	-32.25	-12.25		0.00138
0.00142	-5.96875	-20.75	4.6875	-2	36.4375	11.2812	-8.3125	-9.3125	8.1875	-10.5625	-7.59375	-37.0312	0.00142	-11.5625	14.625	10.2812	-23.625	-22.375	-27.125	15.4688	-0.375	13.875	25.3438	-36.5938	-27.5312	-7.875	-19.625	3.875	27.6562	6.5	-3.5	-13.2812	-35.25	14.3125	0.0014	-13.6562	-34.6875	14.5312	18	12.1562	17.5938	-2.875	-20.2812	-10.1562	2.8125	12.6562	14.7188		0.0014
0.00144	-13.5625	-40.2188	-25.3438	-23.9375	-19.5312	-31.1562	-28.125	9.875	-7.125	-1.8125	-25.7812	0.125	0.00144	6.5625	-10.75	-1.5	-31.4375	33.9062	-34.9375	-7.09375	15.5625	-0.84375	11.5	-7.0625	15.0625	18.9062	8.46875	20.0938	-3.6875	-20.8438	-19.5312	-6.71875	24.4688	-18.5625	0.00142	-5.59375	-1.53125	-3.375	-12.125	-38.9688	-12.7812	-24.2188	-8	7.34375	-6.78125	10.7188	13.7812		0.00142
0.00146	7	25.5938	-14.4688	24.2188	-24.0625	17.3438	-12.7812	-17.5625	-25.0938	-10.875	30.5625	8.59375	0.00146	-3.375	-11.5625	-8.78125	20.3438	-22.25	-0.90625	1.25	-24.4375	-32.6562	-3.78125	9.9375	31.125	-26.5	-16.25	-21.5625	1.53125	-19.8438	-9.46875	-15.9062	-4.75	2.9375	0.00144	7.6875	-7.15625	18.2188	11.375	11.4688	-10.9375	3.71875	-2.6875	31.6562	10.6562	-7.46875	12.75		0.00144
0.00148	-10.6875	-8.46875	-2.3125	-10.75	24.1875	2.0625	-8.71875	-14.3438	42.1562	-14.6875	11.4375	-20.8438	0.00148	-33.125	3.9375	18.1562	-34.2812	-40.5938	2.375	-33.9688	14.4688	-13.7188	5.1875	-20.6875	-18.2188	-20.7188	-18.7188	-12.4375	22.2812	-25.2812	2.4375	-29.7812	-18.75	41	0.00146	-7.21875	9.25	-21.8125	6.15625	10.4375	1.1875	16.8438	26.9062	-15.0312	14.0938	5.53125	0.09375		0.00146
0.0015	10.125	-22.3438	0.0625	-44.25	-0.0625	-27.0938	-28.7812	21.5625	4.5	20.3125	-29.4062	-12.3438	0.0015	54.4062	-27.2812	-4.375	-1.5625	5.40625	-9	0.53125	18.25	18.5625	6.21875	-4.09375	-25.2812	9.53125	17.125	1.625	20.3438	14.5	1.59375	-3.78125	-18.8438	-8.8125	0.00148	17.7812	18.1562	-15.6562	11.9375	4.40625	4.375	-45.2188	-29.25	12.25	-22.9062	-21.9062	-23.375		0.00148
0.00152	-14.9375	9.09375	-27.875	14.9062	-17.4375	-4.5	4.65625	-12.8438	-52.9375	24.1875	-16.6875	13.6562	0.00152	-24.5	-4.1875	-49.3438	8.1875	10.125	31.625	-17.5312	-37.4062	-21.25	-5.71875	17.5938	12.6875	-23	-11.5938	-9.21875	-29.0625	5.96875	0.15625	9.125	41.375	-13.7812	0.0015	5.46875	-23.4375	12	-2.125	27.4375	-20.6562	-7.78125	-8.5	-4.28125	-2.4375	-6.34375	-14.4375		0.0015
0.00154	-12.5	3.90625	19.875	29.0625	-26.9688	-2.3125	10.4375	-33.375	33.75	-21.9375	25.5938	30.6562	0.00154	-22.4375	13.1875	-4.90625	-12.0625	-28.1875	-6.625	5.625	11.2188	1.875	-4.375	-18.3438	-33.6562	-16.1562	-23.5938	-14.75	14.1875	-14.5	-7.28125	-1	-18.9062	31.375	0.00152	-33.7812	-7.75	-19.875	-10.5625	-20	-2.25	21.375	-2.09375	-41.9688	1.3125	11	36.9688		0.00152
0.00156	-4.875	-12.375	7.375	-20.8125	18.6875	-15.125	3.03125	23.5	25.5938	-10.875	-38.0938	-27.5312	0.00156	45.1562	-21.9375	-19.0625	-2.9375	1.5	-33.9062	17.0625	18.7812	6.78125	8.15625	-41.4688	-26.1875	39.125	-18.5625	16.1562	11.875	-6.0625	23.4062	-25	-17.0625	1.15625	0.00154	6.90625	3.28125	20.8125	-7.0625	-26.9688	0.625	-22.1875	-37.125	18.8125	-9.40625	3.21875	-4.5		0.00154
0.00158	3.28125	9.625	-36.9375	-13.1562	16.4688	7.3125	-27.9062	-0.125	-30.0938	-28.7188	-32.75	-23.125	0.00158	-17.5312	9.34375	-29.0625	22.3438	-3.0625	24.8125	-39	-23.8438	8.28125	-26.1875	31	25.5938	2.71875	-10.7188	-14.875	-28.25	12.7188	8.625	3.53125	18.5938	-45.7812	0.00156	13.8125	-18.25	-0.1875	12.1562	12.7188	12.4688	-10.8125	-1.21875	12.3438	-13.4688	-21.4688	0.09375		0.00156
0.0016	12.375	28.2188	4.8125	30.5625	16.0312	-18.4688	-13.3438	-23.5625	-22.2188	-19.4062	18.6875	1.1875	0.0016	-49.5938	16.9375	13.6875	-17.0938	-18.2188	20.9062	-2.59375	-19.125	6.6875	-0.53125	-16	-14.5	-25.5938	-9.90625	-28.7188	-1.9375	-21.1875	-14.0312	1.28125	-8.375	-11.9062	0.00158	-6.1875	2.90625	-24.25	2.40625	-23.7812	-11.75	17.6562	18.2812	6.71875	-19.875	-6.34375	-1		0.00158
0.00162	-16.8438	-16.9688	-2.9375	-10.75	5.09375	4.84375	7.03125	16.9375	18.3438	5.34375	-10.7812	-1.125	0.00162	18.8125	-33.6875	21.9688	-12.2812	-6.21875	-22.4375	-2.625	23.6562	-6.90625	-7.21875	-5.1875	-39.3125	-10.2188	9.90625	7.34375	16.0938	-7.6875	34.375	-10.5	-16.4688	-12.0625	0.0016	-18.5625	-27.4062	-13.875	-25.4062	-13.2188	-12.3125	32.5312	14.6875	7.625	19.2812	-2.40625	-37		0.0016
0.00164	-10.6875	-23.625	-8.46875	-7.28125	-4.71875	-5.71875	-19.7812	1.09375	1.125	-11	-14.0938	-6.84375	0.00164	-0.4375	-8.40625	-28.9375	25.9062	15.4375	28.125	7.90625	-6.625	0.71875	-40.0938	16.3125	3.90625	18.7188	5.59375	-11.25	-27.5625	9.5	-17.6875	0.15625	8.78125	-5.6875	0.00162	6.5	-3.03125	0.21875	-13.9062	-8.34375	12.1875	-24.7812	-1.5625	42.1562	-3.5625	-30	-13.75		0.00162
0.00166	-5.5625	8.78125	12.9375	4.96875	21.6875	-20.3125	27.5938	-36.4062	-24.375	-17.7812	23.9062	-8.25	0.00166	-30.3125	15.9375	16	-26.2188	-28.1562	-0.34375	-0.78125	-1.1875	-25.5	4.375	3.71875	-16.2188	-18.0938	-13.6875	7.59375	-13.2188	-9.46875	-9.1875	-8.65625	-8.65625	7.0625	0.00164	-29.9062	-1.78125	-25.0312	-20.4062	-12.3438	17.0938	-12.9062	3.96875	-17.3125	-17.5625	-5.8125	6.15625		0.00164
0.00168	-9	-23.0938	2.96875	-50.0938	-24.125	-13.2812	27.4688	-14	-14.9375	28.8125	-4.65625	-30.7812	0.00168	-11.3125	-22.9375	31.5312	-27.5	-8.46875	-38.0312	-1.96875	38.0312	12.3438	1.34375	-17.375	-16.8125	0.71875	9.25	24.8438	9.15625	-17.0625	2.96875	-11.6875	-7.03125	2.3125	0.00166	-20.375	-7.0625	-29.5312	-14.5938	10.75	-24.1875	11.25	-8.59375	-7.09375	-12.75	-9.0625	-1.09375		0.00166
0.0017	-9.5625	-24.5938	-4.5625	6.71875	-13.6562	8.625	-4.0625	37.3125	1.34375	27.1875	-47.3125	-7.9375	0.0017	-28.6562	-5.75	-54.5312	14.0938	15.875	-15.2188	5.46875	-36	-19.125	-27.9688	-6	-0.875	13.8125	9.25	2.53125	-7.84375	10.4688	19.5312	-1.71875	6.34375	-9.3125	0.00168	20.5938	-13.6875	3.21875	4.3125	17.375	-4.59375	-0.5	-0.625	12.3125	-1.5625	14.4375	-26.9375		0.00168
0.00172	-26.9688	16.6875	-28.625	6.875	0.1875	-14.0938	-23.6875	-26.8438	-20.1875	-50.5	39.4688	23.75	0.00172	-7.5625	41.8125	-11.5938	-20.8125	-3.78125	24.125	4.96875	-5.09375	-21.3438	-6.84375	7.8125	-4.375	-14.9375	-22.9375	7.84375	-15.25	-6.09375	-49.5	5.21875	38.4688	2.09375	0.0017	-4.40625	-6.53125	6.75	11.0938	0.96875	19.9375	-16.0625	2.34375	-15.25	6.71875	-3	6.8125		0.0017
0.00174	-4.875	17.4062	-2.96875	-10.625	-6	-12.3438	4.125	-28.9062	-29.4062	-27.0938	8.34375	2.375	0.00174	-14.3125	-1.625	33.5625	-28.75	-3.875	-26	2.90625	4.15625	-23.125	23.8125	-14.4375	-28.6562	15.5	8.5625	39	19.0938	-25.9375	0.125	-0.90625	-26.375	4.5625	0.00172	0.75	20.5	17.7188	-23.2812	-41.4688	-24.2188	-9.0625	-46.625	-15.3125	5.40625	3.03125	22		0.00172
0.00176	7.53125	-8.71875	-26.125	-16	-25.875	-23	3.46875	10.9688	8.84375	26.7188	-56.25	-30.125	0.00176	11.1875	9.03125	-17.25	30.3125	-7.625	-7.5625	-10.9375	-7.96875	-16.75	-20.25	11.1562	9.1875	14.6562	-4.96875	9.125	-41.6562	-1.59375	33.9062	-7.25	6.34375	-21.5625	0.00174	22.8125	-24.6875	6.9375	-8.375	-23.9375	-14.2812	13.0938	4.875	12.4062	18.4688	4.25	-0.25		0.00174
0.00178	11.6875	6.875	-12.625	9.1875	-2.3125	-10.5938	-45.4062	-3.71875	1.09375	-1.5	23.5	-23.9375	0.00178	-3.0625	26.7812	-15.2188	5.5625	-6.0625	32.5312	-0.84375	-14.6562	-20	-7.375	26.5312	22.6875	-40.7188	8.75	-11.25	18.875	3.75	-31.9688	-6.21875	3.59375	-17	0.00176	-4.84375	8.5625	-15.5312	26.7188	5	22.4375	5.5625	8.9375	-10.0312	-21.625	-23.0938	5.90625		0.00176
0.0018	-10.2188	14.4375	15.5938	28.7812	-26.1875	-30.75	-31.0938	0.375	-25.8438	-43.5625	-6.59375	-20.9062	0.0018	2.8125	2.125	36.0938	-12.4375	15.3438	-31.2812	9.125	10.5	13.9375	10.75	-33.4375	-36.7812	-46.5	2.90625	15.7188	-4.84375	-2.46875	3.78125	31.0625	-32.125	8.4375	0.00178	-8.65625	-11.1562	4.96875	-10.125	-7.78125	-0.65625	-37.5938	-16	-34.375	3.46875	2.21875	6.46875		0.00178
0.00182	-6.0625	-9.75	-14.5312	3.0625	-27.1875	-2.21875	31.25	-5.6875	-19.1562	24.6562	-43.1562	9.21875	0.00182	18.3438	7.375	-33.1875	7.3125	20.4062	-9.375	-23.875	-5.5	-9.4375	-16.9062	13.5938	-20.75	35.2812	-5.78125	16.2188	-31.7812	18.6875	8.65625	7.21875	4.21875	-21.1562	0.0018	28.625	10.75	3.375	-34.2812	9.59375	-24.7812	-12.5625	-13.6562	2.5625	14.4688	17.4688	-15.75		0.0018
0.00184	7.875	7.5625	40.0938	14.9688	-0.03125	-4.90625	-9.9375	-36.1562	16.0938	-3.65625	-23.3125	-16.7812	0.00184	-21.375	7.6875	6.0625	-14.375	-34.8438	26.1875	16.125	-22.7188	3.9375	-11.4688	9.5	26.0625	-20.4375	-17.1562	-33.25	-1.96875	4.21875	-7.71875	-11.2812	5.5	-6.5625	0.00182	-30.0625	12.8125	12.5625	9.1875	32.3125	-17.4688	12.3125	8.21875	-10.9375	-35.5312	-12.0312	-0.6875		0.00182
0.00186	1.1875	27.7188	0.96875	-26.4688	26.6562	-34.3125	-38.625	0.40625	-23.5312	-14.125	4.15625	-5.8125	0.00186	-14.9062	-17.8125	4.84375	-18.5	-5.6875	-35.9688	3.3125	1.34375	2.1875	-15.625	-21.4688	-31.2188	-26.9688	-23.875	-5.5	10.7188	-22.9688	-27.1562	6.09375	-24.4688	7.53125	0.00184	-20	0.84375	-21.6875	3.96875	-30.875	-9.34375	-31.375	7.4375	-9	-20.9688	-18.1875	2.09375		0.00184
0.00188	-14.4375	-12.7188	-28.0312	19.9688	-49.625	3.03125	3.53125	7.0625	-53.0938	7.84375	11.8125	24.4688	0.00188	10.9062	16.75	-20.25	2.5	27.3125	4.4375	-39.1562	11.8125	1.3125	-13.1875	-11.1562	-16.4062	-0.53125	-10	14.875	4.28125	4.96875	-5	-0.34375	-35	-8.8125	0.00186	8.875	-10.625	0.15625	-7.09375	-13.9062	-31.5312	12.2188	-10.2188	5.59375	28.0625	2.875	-8.875		0.00186
0.0019	-5.8125	-0.46875	-4.8125	25.125	17.5938	2.375	-2.25	-28.4688	-5.25	-11.5625	-10.3125	-12.5625	0.0019	-11.6562	11.8438	-12.9688	7.75	-27.2812	10.2188	-13.2812	-28.8125	-5.8125	-25.4375	0.75	29.4688	9.75	-9.5625	-36.4688	-15.6562	32.875	8.125	-3.9375	1	-14.0312	0.00188	28.4688	-14.8438	8.65625	-6.59375	31.4688	24.6562	17.0938	-6.1875	-22.7812	8.9375	10.3125	-16.4375		0.00188
0.00192	-10.9062	19.2188	34.4062	-6.8125	41.6562	-31.5	1.125	-12.2188	5.28125	-28.625	-3.75	-7.5625	0.00192	-4.15625	-11.9688	14.2188	-30.5938	-18.4375	-36.8438	9.84375	26.5625	-3.9375	-3.625	-5.15625	-27.4688	-33.5312	15.3438	-10.375	11.0625	-50.1562	-33.5938	-13.8438	10.4688	27.1562	0.0019	-17.375	-3.21875	-13	22.5312	32.875	5.8125	-24.3438	-7.28125	11.4062	-5.5625	-7.5	-23.2812		0.0019
0.00194	-28.0312	-18.6875	-23.7812	-13.1562	-2.625	2.78125	8.0625	13.4688	-29.875	19.75	-17.375	3.875	0.00194	6	-23.0312	19.4375	-12.2812	12.4375	-46	-10.3438	-1.84375	-5.15625	29.3125	-42.8125	-11.125	9.75	7.25	23.0938	-6.59375	1.96875	-7.4375	-20.7188	-22.125	3.90625	0.00192	-5.53125	-2.5625	7.96875	-7.03125	-0.625	-5.875	11.5625	-14.5938	-14.8438	-13.25	-25.6562	-11		0.00192
0.00196	9.25	-16.7188	-5.9375	-13.0625	-10.7188	-8.71875	-7.25	-30.2188	-5.8125	11.125	-3.125	-0.75	0.00196	11.2188	9	-15.5625	8.59375	-32.8125	6.6875	6.8125	-55.4062	-13.5	-11.25	-19.125	6.40625	4.875	-15.7812	-27.5625	-37	25.6875	-4.4375	-33.2188	-3.5	-34.6562	0.00194	8.4375	5.90625	-17.9375	26.3125	-28.4375	16.5312	-1.40625	31.4688	10.3125	-3.90625	19.2188	7.6875		0.00194
0.00198	-26.4688	4.5625	13.3125	-2.1875	23.3438	-16.375	-34.4375	-21.3438	30.2188	-28.9375	10.125	-20.5625	0.00198	-24.0625	-37.375	21.4375	-43.8438	-11.9688	13.75	0.09375	25.5625	7.03125	15.5938	2.59375	-9.8125	-18.0938	-23.3125	-13.125	30.2188	-32.2812	-37.9375	-13.25	30.2188	19.1875	0.00196	-5.28125	-2.1875	-27.2188	-17.0625	-6.59375	16	-16.0938	18.8125	2.21875	0.15625	-16.625	15.3125		0.00196
0.002	4.8125	-9.34375	-45.5625	-26.7188	6.25	-0.5	-10.9062	28.8125	4.90625	18.0938	-17.9375	5.09375	0.002	17.7188	-25.7188	-10.875	-15.5	33.75	-28.4688	-3.3125	32.625	-2.09375	18.5938	10.4375	-21.8125	13	-3.65625	27.5	8.375	-21.2188	1.53125	1.90625	20.3125	-2.46875	0.00198	-15.5312	-32.0312	-4.65625	-9.5	13.3125	-9.65625	-30.5938	-18.9688	16.3438	-12.1562	-0.34375	21.7812		0.00198
0.00202	34.1875	-36.875	-26.2188	23.8125	-1.5	19.3438	11	10.7812	-7.0625	-1.53125	21.1875	37.1875	0.00202	-7.125	4.125	-19.625	8.46875	-11.25	0.65625	33.375	-52.5938	-12.5312	-24.5	-23.5312	30.0312	3.71875	-4.90625	-13.9688	-18.8125	0.8125	32.75	-33.2812	13.5312	-14.8125	0.002	15.0312	-4.71875	-10.7812	-23.7812	6.0625	-18.6875	8.28125	-44.9062	-50.4062	-21.4688	23.3125	-5.65625		0.002
0.00204	-18.1875	-20.5938	6.6875	17.4688	1.375	5.53125	-22.4688	-13.2812	38.7188	-16	6.625	-28.7188	0.00204	-11.5625	0.75	16.25	-13.4375	-10.9375	37.4062	-3.9375	-7.78125	7.03125	6.4375	7.59375	-0.125	-8.90625	-23.25	-13.3125	39.875	-18.9688	2.6875	13.875	11.0625	39.5	0.00202	-5.40625	-6	3.96875	-4.5625	-33.9375	30.375	11.5312	36.6562	-20.5938	-13.5625	0.53125	-32.2188		0.00202
0.00206	-27.5	5.4375	10.4688	-27.2812	-29.8125	-45.75	-16.25	11.5625	-19.5312	19.4375	-11.9688	-13.7812	0.00206	4.46875	-27.9062	-24.25	-17.3125	22.1875	-37.0938	-22.25	41.0312	-8.5	28.4062	7.65625	-10.1875	5	-2.40625	-10.3438	1.59375	-39.375	-1.5	-12.125	30.4375	-19.5938	0.00204	-39.7812	-6.46875	2.40625	-5	-15	-9.21875	-9.03125	-7.5625	25.4062	26.7812	-2.3125	-6.625		0.00204
0.00208	15.7812	15.3125	-5.46875	20.4375	-4.15625	-17.75	9.9375	9.46875	-13.3438	-16.5938	1.125	4.8125	0.00208	-1.96875	5.5	-31.75	26.25	-10.2812	2.90625	-15.9688	-37.375	-10.0312	-12.0312	-1.34375	11.5	11.6562	23.4375	-0.125	-26.0938	0.28125	22.1562	-14.625	-3.5	-38.7812	0.00206	14.1875	-3.65625	4	12.9375	9.0625	5.6875	-28.8125	-19.0938	-6.25	14.3438	-18.1875	33.0312		0.00206
0.0021	17.9062	10.9062	12.5	8.875	36.0938	4.6875	0	-13.5625	11.0938	-27.8125	-30.2188	-11.875	0.0021	-2.6875	12.2812	-4.84375	-9.90625	-24.7812	24.5938	4.53125	-33.1562	-7.40625	-10.5625	-4.34375	2.875	-15.6562	-16.5312	1.21875	-22	22.4375	-25.3438	8.46875	4.8125	-13.0625	0.00208	27.9688	-7.375	-2.125	10.6562	7.96875	7.34375	29.125	17.7812	-26.75	-28.5312	-13.375	-29.5		0.00208
0.00212	-33.5625	-29.7812	-2.125	-36.3438	-29.6875	-18.2188	-0.40625	22.0625	13.0625	35.9062	-33.9062	-10.4062	0.00212	-24.25	-30.5938	-1	-17.125	27.5625	-32.9375	-15.7812	13.6562	-11.4375	-2.8125	8.8125	-37.2188	10	-14.2188	-2.09375	-10.4375	-27.5625	14.125	-1.6875	11.6875	5.0625	0.0021	1.53125	8.6875	-36.2188	-20.7188	-0.09375	-1.1875	23.4375	-23.625	2.34375	-3.75	-17.75	-23.5312		0.0021
0.00214	-14.2812	-7	-39.3125	10.4375	-17	2.8125	41.9688	-30.0312	-19.3438	7.6875	14.4375	-6.5	0.00214	-4.4375	0.46875	-34.1562	13.25	13.6875	6.65625	-6.5	1.6875	-10	-14.9375	-5.5625	-11.0938	22.75	14.6875	-1.3125	-17.8125	2.53125	46.4062	11.9375	-0.65625	-11.6875	0.00212	-18.875	-16.0938	-29.5312	9.75	-19.8438	-19.8125	-32.0312	1.875	-39.1875	-3.59375	31.9688	17.9375		0.00212
0.00216	-18.5625	35.25	-3	-1.25	-15.75	-5.1875	23.6875	-32.6562	-4.5	-11.2188	12.0938	-43.5625	0.00216	25	29.1562	18.3125	-1.25	-31.7812	49.5	14.0625	-6.25	13.5312	-33.9062	-23.25	-4.25	-27.8125	-4.375	-50.4062	-26.2188	10.7812	17.4688	-17.5938	-12.5	-11.7812	0.00214	-1.0625	5.34375	23.3125	23.1875	-12.5	4.34375	-9.6875	-16.7812	-1.8125	25.5312	-24.375	-20		0.00214
0.00218	-45.0312	-21.4375	-1.96875	-23.2188	7.65625	-7.21875	-4.78125	32.75	-14.8125	13.3125	-35.6562	8.0625	0.00218	-24.6562	-30.3438	12.2188	-20.5625	17.6875	-9.75	-23.7812	20.3125	22.0312	-7.875	43.8438	-42.625	-0.59375	-23.0625	32.2812	5.5625	-12.4375	5.8125	6.5625	-7.09375	13.9375	0.00216	1.5	-18.3438	1.90625	-35.3438	21.4688	25.0938	12.2188	-20.3125	23.875	-24.3438	-22.6875	-11.4375		0.00216
0.0022	14.1875	-26.25	-4.25	-6	-17.1875	-12.0625	-4.53125	-15.3438	-21.5312	41.9375	6.90625	-16.6875	0.0022	21.2188	-6.375	-21.1562	20.1875	5.875	-25.8438	-7.03125	-21.5938	-46.2188	11.4062	4.34375	-7.90625	-11.8125	4.96875	-22.0312	-5.1875	1.21875	29.875	10.3438	3.5	-9.5625	0.00218	-12.125	-15.8125	1.9375	-18.9375	-9.4375	-9	16.7188	33.9688	-14.7188	-25.2188	8.1875	16.0938		0.00218
0.00222	-11.9688	-44.9375	3.5625	21.1562	3.53125	1.4375	-6.625	-26.5938	-19.4688	-27.1562	21.5938	-18.6875	0.00222	-27.5312	16.9688	2.3125	-8.5	-30.125	37.5938	2.34375	-24.4688	0.59375	-21	-17.3125	17.1875	-12.0938	6.78125	-22.1562	-28.5625	13.5938	-15.2188	1.1875	6.375	-18.25	0.0022	13.4688	7.21875	-7.5625	20.9062	-12.7812	-16	-26.2188	-14.25	-14.5	-27.0312	15.6562	-34.5625		0.0022
0.00224	-38.2812	-3.0625	18.7188	-45.4062	1.8125	-22	2.46875	-22.2812	-28.4062	19.9062	-12.6562	-14.4062	0.00224	-30.3438	-5.03125	16.5625	-6.84375	14.75	-35.3438	-12.4688	30.9062	-6.90625	-21.2188	33.5625	-7.5	-13.3438	-4.96875	-0.125	15.1875	-12.4688	-35.0312	-17.3125	0.09375	2.78125	0.00222	-0.8125	-19.125	11.4062	-27.6875	-1.125	-2.8125	-12.1562	-24.25	6.6875	8.5625	-18.125	-11.1562		0.00222
0.00226	-9.625	0.15625	-50.3438	-13.5625	-15.8438	-12.625	18.4375	-22.1562	3.125	50.5938	-10	17.5	0.00226	-3.53125	-12.25	-20.2188	7.8125	2.78125	-27.0625	-8.125	-12.2812	-30.8125	13.2812	20.625	15.7812	0.5625	34.25	-2.53125	-6.78125	-4.9375	10.7812	7.96875	4.5625	9.46875	0.00224	-31.5	-18.1875	-15.625	-25.125	10.7812	-5.75	18.1562	5.21875	18.125	18.7188	4.15625	17.6562		0.00224
0.00228	8.9375	-0.6875	-36.2188	8.875	-2.6875	-14.8125	-27.8438	6.09375	-13.5312	-16.9688	35.625	23.9062	0.00228	-5.5	-14.9062	27.0625	7.15625	-12.9062	-3.875	21.6875	1.03125	-35.1875	-24.8125	0.6875	15.0938	-6.46875	-9.65625	-24.6562	-7.25	26.375	-15.0625	16.9375	-15.1875	2.78125	0.00226	-18.3438	15.6875	5.8125	14.6875	7.6875	9.71875	5.5625	27.0312	-19.7812	-23.8438	-3.3125	-2.46875		0.00226
0.0023	25.5938	-57.6875	29.8125	1.34375	-1.03125	-12.625	-13.9375	12.1875	8.8125	-22.125	-33.2812	-43.5312	0.0023	-7.125	-21.3125	21.375	-19.0312	3.59375	-47.7812	1.90625	17.75	30.5312	6.71875	22.3125	-23.7188	-18.375	-35.5312	37.7812	26.7188	-15.875	-32.7812	12.5938	-6.53125	11.7812	0.00228	-13.4062	14.875	31.625	35.9375	-27.6562	-9.84375	11.1562	-35.1562	0.1875	27.7812	-22.6562	9.625		0.00228
0.00232	-15.625	6.8125	-6.59375	12	-12.0938	15.8125	7.8125	3.96875	31.4062	5.875	-8.59375	-18.8438	0.00232	21.8125	-22.8125	-12.1875	3.28125	11.1562	12.6562	-14.7812	-38.7188	-25.25	18.2188	25.625	-23.7812	11.625	6.1875	20.0312	2.125	-29.5312	15.2188	-25.2188	-6.5	-17.25	0.0023	20.6875	-8	-25.625	-28.125	5.3125	-30.1875	-25.6875	-26.9688	15.25	2.5625	15.7188	31.5		0.0023
0.00234	-11.0625	53.9375	-26	-16.8438	-14.7812	-39.4688	-14.25	-32.5312	-32.2812	-8.0625	39.6875	36.9688	0.00234	23.5	14.375	-14.4062	23.1562	-30.4375	23.9688	-3.71875	-37.0938	-31.2188	-5.25	-20.9062	19.4062	-25.4375	4.125	-46.3125	-28.8125	8.875	2.59375	-6.6875	-21.7188	-20.8125	0.00232	-2.8125	-8.875	-8.34375	14.7812	8.6875	-6.90625	-21	21.9062	-28.9062	-15.2188	60.625	12		0.00232
0.00236	-14.3438	-15	-13.3125	-37.3125	12.9688	-13.2812	-11.875	-17.2188	-14.0625	-16	-15.125	10.8438	0.00236	5.8125	7.75	6.46875	-16.1562	13.4062	-2.375	23.625	23.1562	70.4375	-9.5	-18.6875	-30.9062	-12.2188	-18.3438	-18.6562	10.9062	12.5938	-19.2812	16.0938	-13.625	1.40625	0.00234	8.84375	24.875	-0.5	-15.9375	-24.375	16.375	-36.9062	-18.7812	5.625	4.46875	-11.4375	9.4375		0.00234
0.00238	9.9375	-50.7812	18.0312	2.625	-16.0625	3.15625	-17.0938	14.5938	1.875	21.7188	-36.3125	-37.7188	0.00238	-5.71875	-1.90625	-23.5312	-22.5	20.875	-28.0312	-48.7812	-13.625	-16.875	-7.65625	8.28125	-1.8125	18.875	-39.875	35.8438	2.15625	-15.5312	-16	-15.9375	-31.125	-0.125	0.00236	6.46875	-37.8125	5.03125	-14.6562	16.9375	-3.71875	23.9062	-26.0938	-4.6875	12.6875	-22.5625	8.96875		0.00236
0.0024	-17.5	-4.9375	33.5	25.4375	7.34375	-11.4688	-42.8438	-4.25	-5.5625	-26.2812	34.625	4.5625	0.0024	-30.4062	8.03125	-11.75	23.3438	-26.3125	-3.65625	-19.75	-19.5	-7.71875	0.21875	-4.5625	18.5938	-15.75	20.7812	-42.4062	-32.7188	15.6562	9.8125	-5.4375	-27.0625	-3.3125	0.00238	15.4375	13.8125	-17.9062	3.21875	4.4375	1.46875	5.375	26.6562	-4.625	-8.59375	0.25	-17.625		0.00238
0.00242	-21.5625	18.3125	11.4062	-13.8125	0.0625	-17	6	-15.5625	-5.65625	-36.5	-6.71875	15.4375	0.00242	1.4375	-2.34375	35.8125	-7.15625	-16.25	-18.4688	4.3125	-8.625	16.9375	14.25	1.875	-23.2188	-39.1562	-33.5625	-27.5	7.46875	-3.625	-21.875	11.1562	-29.3125	-12.9375	0.0024	-36.0938	33.5312	-14.3125	-8.4375	-3.28125	-17.2188	-9.125	0.40625	-2.5	-4.625	-25.2188	-18.7188		0.0024
0.00244	7.65625	-23.1875	-43.9688	-23.4062	-28.2188	19.0625	-13.4062	-21.2188	3.78125	31.0625	-53.8125	-3.40625	0.00244	9.15625	5.78125	-33.8125	-22.6562	24.4375	16.2812	-30.6562	20.9375	8.59375	39.4688	-19.625	5.28125	-15.1562	-14.9688	25.9688	-16.625	-22.875	-14.4062	-37.1562	31.9688	-11.9375	0.00242	-9.875	-23.5312	13.0938	14.6875	-22.6562	-17.1875	3.8125	-46.625	-10.875	-18.25	-10.3438	16.0625		0.00242
0.00246	15.3125	13.4688	1.78125	12.4375	16.625	29.875	-12.2188	3.90625	3.875	1.21875	-7.78125	-17.0312	0.00246	-21.2812	-6.8125	-15.6875	4.84375	-15.1562	-0.90625	7.21875	-17	-24.25	2.90625	-20.5	3	46.8125	42.5625	-24.625	-12.9062	-7.3125	25.125	-3.6875	-26.0938	11.75	0.00244	-21.9375	-5.6875	1.40625	15.4375	36.8438	20.125	-14.875	7.5	0.96875	-21.5938	-0.375	-2.71875		0.00244
0.00248	-35.4062	-9.9375	39.6875	24.4062	33.625	-41.875	-23.3125	-11.625	-30.7188	-34.8438	39.75	-1.875	0.00248	-24.25	-28.0938	37.7188	-24.0938	-31.9062	-32.125	21	31.0938	15.5625	-17.4688	-45.7188	-4.28125	-19.7812	-30.2188	-3.125	4.09375	2.21875	-8.0625	-8	-18	2.8125	0.00246	18.7812	19.0938	-21.7812	-35.7812	11.8125	10.3438	-6.25	7.84375	-3.40625	-9.4375	-9.40625	-16.5		0.00246
0.0025	-0.625	-21.125	-35.5312	-12.5312	-1.3125	-15.1875	11.8125	-0.5625	-0.71875	2.71875	12.3125	-12.25	0.0025	30.0312	-32.4375	-23.9062	-5.1875	16.3438	-4.90625	-17.9688	49.625	18.3438	3.65625	-1	-27.7812	-1.4375	-1.125	18.6562	-2.0625	-48.9688	-20.7188	4.46875	7.03125	19.1562	0.00248	-10.25	-9.875	-3.46875	-16	-6.5	-22.4375	18.8438	5.875	1.96875	21.8438	-14.8438	-22.2812		0.00248
0.00252	-24.0625	28.5625	-35.7188	-12.5938	-25.7188	-23.4688	12.9688	-15.2188	26.375	-7.65625	-12.5625	5.3125	0.00252	-15.3438	14.0938	-29.1875	13.5625	-13.5312	51.5625	-2.3125	-9.65625	-24.8438	-16.7812	13.5625	22.7812	27.5625	30.0625	13.3438	2.21875	-1.28125	12.875	-27.875	14.375	-14.25	0.0025	-4.9375	-2.15625	-13	5.65625	-17.1562	12.625	-21.1875	8.21875	-18.2812	17.8438	21	-24.4062		0.0025
0.00254	-7.5625	6.40625	14.2188	-21.3438	-4.8125	-15.9062	-10.5312	-8.375	-0.9375	-0.375	-3.125	-6.21875	0.00254	-34.25	-34.4375	28.8438	-22.7812	-19.0938	21.3438	17.5312	1.375	4.1875	-33.5312	-8.4375	-0.875	-20.1562	-1.8125	-31.4375	-1	-28.5	-27.0312	-0.75	33.9375	5.40625	0.00252	5.125	-2.875	-21.3438	4.65625	-9.625	6.1875	-6.5	-8.09375	3.8125	-10	-1.96875	30.8125		0.00252
0.00256	7.8125	-21.4375	-17.25	-33	26.3125	10.7188	29.125	34.9062	-26.875	-24.5	-18.25	10.0312	0.00256	8.40625	-2	-9.875	-12.2188	6.21875	-42.9375	13.25	24.125	13.875	-10.125	12.2812	-21.5938	19.75	-36.0312	-4.21875	-0.5	-29.7188	10.2812	2.34375	-20.875	6.5625	0.00254	-19.3438	-51.0625	9.84375	11.7188	-17.125	3.625	-3.71875	-6.96875	-2.3125	-10.9688	3.75	-0.34375		0.00254
0.00258	23.6562	-29.125	-22.375	2.46875	-12.9375	19.8438	-18	-22.5625	-1.71875	8.9375	-20.75	-8.0625	0.00258	6.78125	17.6875	-21.7188	4.9375	-5.59375	-9.4375	-18.4688	-14.125	-34.0938	-9.53125	-5.21875	5.09375	24.9062	28.75	17.7188	-23.1875	6.34375	7.65625	-8.40625	-22.8438	-12.2188	0.00256	-10.8125	-16.75	10.8438	-11.2812	-12.75	-5.9375	3.25	-10.7812	-20.1875	-31.0625	-9.78125	-13.2812		0.00256
0.0026	-34.5625	-4.09375	-25.0938	24.4688	-34.1562	-62.9062	-53.9688	-14.125	6.71875	-6.96875	-9.34375	-7.78125	0.0026	-17.9375	-30.2812	9.59375	-28.4375	-13	6.84375	26.4062	-18.1562	-23.5312	25.5	-8.59375	3.875	-10.7812	-0.71875	-43.3438	3.8125	31.3125	0.375	-10	-15.9688	3.625	0.00258	8.09375	10.0938	-17.5312	-7	21.9062	-19.9062	23.4688	-28.3125	14.2812	13.8125	-12.3438	16.5625		0.00258
0.00262	-6.1875	15.6562	-22.1562	-24.625	-4.5	-20	-23.8125	11.5	-6.875	-19.6875	-19.2812	20.5	0.00262	-21.375	-13.9688	1.75	11.875	-6.96875	-54.625	-2.5	40.7188	1.0625	32.4688	-7	-20.875	-23.5	-29.9062	-17.375	10.6875	-6.28125	-5.5	2.09375	3.96875	-2	0.0026	-32.0625	-26.4062	-10.4688	-6.21875	-37.0938	-7	-0.625	33.7812	1.84375	13.2812	9.15625	3.3125		0.0026
0.00264	45.2188	-22.5938	-14.8125	-12.8438	-1.90625	41.4375	5.53125	-6.03125	-4.6875	2.59375	5.625	-33.0625	0.00264	25.3125	38.5938	-37.125	31.9062	0.34375	10.9062	-15.25	-7.03125	3.40625	22.1562	-11.5938	-6	9.0625	6.875	-2.46875	-14.375	5.1875	9.21875	-7.21875	-28.0312	-29.7188	0.00262	-4.75	-2.40625	33.6562	1.125	-7.34375	-1.71875	-21.2812	3.03125	-11.2812	-7.34375	11.9688	-23.75		0.00262
0.00266	-46.0312	-26.5	26.3438	23.1562	-34.5625	-30.75	-7.65625	3.25	10.5938	-25.5312	-3.15625	-24	0.00266	-1.65625	-10	1.96875	-11.0312	7.5625	45.0938	-23.5	-41.625	-36.375	25.6562	2.125	6.09375	-5.375	9.8125	-18.75	5.65625	17.4375	-25.9375	26.3438	9.40625	-6.34375	0.00264	11.1875	23	-11.7188	-15.1562	8.65625	-6.5625	-39.5625	2.65625	13.5625	7.71875	-42.25	-35.8438		0.00264
0.00268	5.8125	5.03125	26.75	2.71875	-6.71875	-18.4062	-9.90625	16.3438	-35.0312	-10.1562	-21.125	-36.4375	0.00268	-10.625	-25.5625	11.6562	-15.7188	-12.7812	-38.0625	-30.0625	13.4062	6.875	-9.3125	13.3438	-38.8125	-24.6875	-21.4688	-0.375	-17.5625	24.5938	-14.3125	3.5625	16.0938	4.0625	0.00266	28.5	15.7188	-7.90625	-17.5625	-25.4375	0.96875	27.25	-10.9062	-15.4062	-3.6875	-7.6875	8.3125		0.00266
0.0027	26.5625	20.375	-37.4688	-32.5312	-16.8125	4.59375	-11.25	5.9375	-33.4062	-12.5938	-1.21875	23.9375	0.0027	15.5	30.7188	-21.3438	37.8125	21.3125	21.0938	-11.6562	-21.4062	-13.125	-2.96875	-14.8438	-9.71875	3.75	-3.90625	-13.7812	-8.25	-29.6562	23.6875	-27.25	-8.5	-17.0625	0.00268	-11.25	-45.5312	19.9062	0	-2.28125	-8.625	27.4688	-2.125	-27.5312	0.5625	3.4375	2.71875		0.00268
0.00272	-16.2188	-29.2812	0.25	5.125	19.0938	-28.875	-41.0938	-29.5625	10.9062	-22.125	-11.1875	-29.7812	0.00272	-15.5	-2.40625	11.7188	-19.4688	-21.7812	59.2188	28.9062	-19.7812	-8.40625	-18.9375	-10.125	6.09375	-2.9375	24.6562	-20.9062	-9.5	-4	-11.1875	18.0312	-24.6562	-3.96875	0.0027	-26.8125	16.3125	-27.5	12.9688	1.4375	3.6875	-39.75	-29.6562	15.375	-12.9375	-7.375	-26.4062		0.0027
0.00274	-11.3125	-29.2188	39.2188	-27.6562	-10.1875	1.15625	25.0312	-48.8125	-27.4688	-9.3125	-1.78125	-21.25	0.00274	-11.1875	0.6875	22.4688	-12.9062	10.75	-22.625	15.4688	36.2188	-0.90625	6.90625	-2.21875	-28.25	-22.4688	-8	6.59375	-30.6562	11.1562	-24.0625	15.0625	13.4375	-8.28125	0.00272	-19.125	11.8438	-4.71875	-40.3125	11.5312	-31.7812	-9.6875	-30.3125	19.0938	17.5938	-11.4062	9.15625		0.00272
0.00276	2.3125	32.4375	-67.25	-10.3125	19.4375	0.65625	13.5625	-9.34375	-50.3438	9.625	13.3438	14.2812	0.00276	19.6562	-2.53125	-25.3438	56.3125	-6.03125	-16.2188	-1.25	-21.625	-13.6562	0.96875	-36.6875	-1.46875	-16.3125	-22.4688	8.21875	-37.875	-7.25	0.0625	0.375	1.5	-13.5312	0.00274	0.65625	-1.8125	2.59375	3.4375	-11.3438	-11.5625	7.59375	39.6562	-16.3125	-5.625	2.75	-14.875		0.00274
0.00278	27.7188	-14.6875	10.125	7.34375	-22.5625	-21.8438	-45.2188	7.46875	18.4688	-9.90625	14.0625	-27.5	0.00278	-19.0312	-28.25	31.2812	31.5	-46.3438	7.75	-12.8438	-16.7812	5.1875	-20.9062	-29.1875	34.4062	15.0938	29.0938	-16.5	34.6875	-11.4688	-34.5	-24.75	-4.34375	11.2812	0.00276	-11.2188	3.34375	-1.21875	-7.375	16.2812	13.4062	-12.375	-22.625	4.0625	24.1875	-20.625	11.5625		0.00276
0.0028	-16.75	-26.4375	28.5	-10.3125	3.84375	-13.9375	8.59375	3.34375	-2.71875	9.59375	-24.2812	21.5938	0.0028	-47.25	-20.875	27.8438	-60.1875	13.1562	-33.0312	-6.84375	29.9375	-8.375	14.9062	-0.46875	-25.7188	-7.4375	-30.4375	-10.0625	6.96875	-2.25	-30.25	28.4062	6.125	2.46875	0.00278	9.8125	-6.875	22.5938	-31.75	-18.9375	4.5	-6.125	-7.21875	-22.375	1.90625	6.46875	-8.96875		0.00278
0.00282	12.875	23.1562	-9.25	-12.4375	-0.15625	15.4375	11.25	-16.8125	-4.75	6.9375	-10.625	9.6875	0.00282	-4.78125	-14.3438	-35.6875	-9	-3.125	-21.5312	-19.625	-21.8125	-35.4688	-2.96875	7	7.40625	9.125	3.71875	4.3125	10.5	-1.53125	-5.21875	-29.7812	-10.6562	-13.6562	0.0028	3.4375	0.09375	-0.09375	7.96875	4.3125	-31.875	23.2812	13.625	-1.15625	-0.375	28.4062	-15.5938		0.0028
0.00284	16.4688	-6.96875	-19.7812	-11.5312	16.9688	-13.0625	-28.7188	-13.25	17.8438	-9.71875	30.7188	26.0625	0.00284	12.4375	12.0938	-16.375	-20.1875	-17.4375	-10.875	16.1562	-30.7188	-0.75	-10.6562	-16.4062	-1.28125	30	18.625	-10.4375	26.8125	-16.125	11.4062	-14.2188	-10.4688	16.1562	0.00282	-10.625	3.96875	-8.1875	1.6875	2.28125	8.3125	-8.25	18.0625	16.5938	-22.9062	11.5	-29.6562		0.00282
0.00286	-3.46875	-47.0625	-14	14.4062	-10.3438	-22.625	-14.5	-11.0312	-6.1875	8.34375	-21.5	-7.8125	0.00286	-2.96875	-1.65625	1.8125	-42.125	-9.5625	-11.4062	-19.1562	12.8125	22.9062	7.46875	7.625	10.4688	-34.1562	-12.2188	-7.625	-34.4062	21.7188	-32.2812	26.25	6.25	-0.21875	0.00284	-6.5625	8.59375	0.875	-3	2.90625	7.03125	-21.4688	-47.2812	0.4375	-4.75	-19.0625	16.9375		0.00284
0.00288	27.1562	11.3438	11.9688	7.34375	-6.59375	-15.5312	7.46875	9.84375	-20.625	12.7812	-22.3438	-0.59375	0.00288	29.25	-19.125	-22.2188	-2.15625	3.6875	-38.2188	-43.25	-29.0625	-3.15625	13.5312	6.78125	-31.25	1.71875	-14.625	21.7188	-7.25	-10.5	-7.125	7.15625	-34.875	-31.2188	0.00286	5.1875	-14.125	-22.9062	-4.6875	-13.125	-0.21875	14.8438	2.78125	7.3125	17.6875	6.59375	28.9062		0.00286
0.0029	-3.09375	7.4375	-10.5312	-25.625	-9.09375	-18.0625	-32.5	3.96875	6.1875	-24.7812	-0.78125	23	0.0029	-0.96875	-11.9062	-6.40625	30.0625	-12.8438	13.5938	10.7812	-33.9688	-16	-12.2812	-32	8.6875	-3.59375	1.53125	-30.3438	24.4375	-5.28125	38.3438	-43.75	-26.7188	19.2812	0.00288	-3.5	22.8125	4.5	3.75	-16.375	-10.4375	-6.96875	31.9375	-6.40625	3.3125	0.5625	-14.125		0.00288
0.00292	-19.4062	-31.4688	8.1875	5.6875	9.21875	13.4688	-11	3.5	-6.75	-31	-26.4688	-33.1875	0.00292	-12.5938	0.65625	8.71875	-19.8125	3.46875	9.8125	-11.625	18.9062	21.5938	-1.53125	3.1875	22.4062	-29.1875	0.34375	-16.75	10.1562	-12.9062	-33	-8.90625	-11.5312	7.78125	0.0029	8.34375	-17.0938	34.1875	17.4375	4.28125	-18.6875	-13.625	-9.09375	5.4375	-24.4688	-36.5625	-6.71875		0.0029
0.00294	3.15625	-3.40625	-30.1875	19.0938	-1.84375	-5.21875	14.1875	-6.125	4.71875	24.2188	-1.3125	2.53125	0.00294	4.90625	31	-8.34375	-5.25	48.0938	-17.7812	-16.9688	8.71875	5.71875	2.34375	11.5	-30.0312	-14.7188	-33.8438	3.625	-4.71875	-20.8438	-5.6875	19.125	10.5312	-20.0625	0.00292	-3.46875	-12.2188	-42.2188	1.84375	7.0625	-3.5	15.875	20.9375	9.34375	-39	7.0625	17.75		0.00292
0.00296	11.1875	21.3438	-12.9062	18.75	-0.75	-13	-13.1875	18.7188	-9	-8.5	45.625	4.15625	0.00296	21.9062	-17.5938	-10.1875	39.4375	-20.3438	9.5	9.15625	-35.8438	-1.8125	-25.3125	-20.25	-15.3438	5.21875	29.0312	-4.875	-11.8125	-12.7812	12.6562	-30.2812	-5.65625	-20.6562	0.00294	-11.4062	18.2812	-14.2812	-2.375	-3.96875	9.53125	-17.7812	-23.8438	-9.28125	29.375	-15.125	-36.0938		0.00294
0.00298	-3.5625	-9.0625	39.4062	-15.9062	1.78125	7.90625	8.46875	8.34375	-17.25	-35.625	-35.7188	-25.5312	0.00298	-54.3438	-8.15625	0.34375	-25.125	-55.5938	18.3125	8.21875	31.9688	9.53125	-8.96875	-21.5312	18.9688	6.03125	-18.3438	-29	25.4688	-4.875	2.84375	-21.3438	-16.6562	3.46875	0.00296	23.4375	-12.9375	26.5312	0.75	7.71875	14.875	-1.4375	-18.2188	-8.125	-24.125	-8.15625	15.1562		0.00296
0.003	-28.4688	-27.0312	-13.6875	-13.3125	-19.75	9.40625	29.0312	-16.2812	0.96875	-0.96875	-16.875	-3.15625	0.003	8.15625	-7.40625	-24.25	-14.5	26.3125	-4.09375	-21.5938	2.03125	0.6875	-0.75	22.6875	-25.7812	-0.15625	-14.5625	6.34375	-38.1875	-12.8438	-15.8125	4.5	32.5625	-27.1562	0.00298	-1.5	-16.9062	20.8125	-18.9375	-11	2.5625	14.4688	0.625	-2.78125	-21.5312	-16.0625	-8.96875		0.00298
0.00302	-40.25	19.625	-3.71875	2.375	2.34375	-19.8125	-14.5625	-30.375	5.4375	16.4688	6.65625	-3.375	0.00302	45.625	2.21875	-6.03125	17.5625	3.46875	45.0312	4.96875	-31.6875	-19.0625	-0.34375	-30.7188	-9.71875	10.5625	-0.5	11.3125	-16.8438	0.5625	24.4375	-22.6875	-2.84375	-9.90625	0.003	-15.75	10.6562	-23.75	-22.9062	-12.75	-9.15625	-20.7188	22.0625	19.9375	3.46875	14.9688	-14.1875		0.003
0.00304	-3.21875	-6	10.0938	-29.0938	14.6562	-35.0938	-12.625	2.09375	-34.7188	-1.21875	-5.25	-5.78125	0.00304	-37.6562	-23.125	27.75	-7.21875	-10.125	21.6875	19.5	14.25	22.2812	-20.4688	-22.375	21.375	16.9062	-13.4062	9.75	8.40625	19.625	4.9375	-25.0625	-26.6875	43	0.00302	-5.71875	-16.5625	-7.125	0.21875	-10.3125	-23.9688	31.9688	-10.1875	-14.1562	-5.78125	6.625	-13.5		0.00302
0.00306	-2.4375	-20.8125	-18.8438	-22.2188	-17.8438	28.8438	31.3125	18.8125	-23.7812	-44.1562	-17.5312	-38.9688	0.00306	-37.5	0.53125	-4.0625	-24.5938	-22	-15.5	-0.375	12.1562	-20.3125	7.0625	35.0938	-8	-14	7.125	21.3438	-15.9688	-13.9375	-48.5312	-14.8125	37.3438	-12.5938	0.00304	-19.9062	7.5625	-2	26.75	28.7188	-13	-25.5312	4.5625	19.0625	-18.8125	-3.125	13.7812		0.00304
0.00308	-1.125	5.46875	-16.25	5.96875	-11	-14.5	-18.2812	-15.4375	8.5625	-14.0625	-8	-6.5625	0.00308	30.2188	6.40625	-7.8125	3.25	-19.125	4.90625	10	-50.3438	-37.5	13.9062	-6.59375	-20.9062	9.6875	2.375	-18.1875	-12.75	-30.125	6.84375	4.90625	0.8125	-21.4375	0.00306	-26.0312	-13.4688	-14.6562	-5.65625	-13.3125	-1.96875	-29.0938	23.8438	-25.9375	-9.4375	-36.375	-1.5		0.00306
0.0031	-22.0625	-17.6875	5.5625	9.71875	4.28125	-23.25	-30.5	-5.71875	-7.53125	22.875	1.46875	23.7812	0.0031	6.71875	-4	13.2188	-8.71875	-40.2188	27.5312	13.4375	-8.6875	-18.4062	-33.5938	-20.5938	33.6875	-9.59375	-8.46875	-27.7812	20.1875	13.8438	13.1562	2.03125	-24.6875	-1	0.00308	25.3438	-20.2812	-6.9375	7.59375	-20.75	13.4688	5.1875	-21	-2.59375	6.09375	-28.9062	-24.9688		0.00308
0.00312	-4.59375	-15.7812	7.8125	-9.59375	-20.2188	17.9062	-8.125	5.0625	-45.9688	8.90625	-6.40625	-12	0.00312	-16.625	0.625	-28.25	-0.5	31.1562	-30.4062	-7	51.0625	19.1562	-12.7812	28	-8	3.34375	-8.5	-20.375	-14.2812	5.90625	-9.125	13.6562	-4.15625	-9.78125	0.0031	23.8438	-53.3125	-23.9688	26.4688	24.6562	35.0312	20.3125	-8.375	12.5625	9.34375	20.875	6.53125		0.0031
0.00314	20.5	-19.2188	46.8438	-12.7812	-29.2188	-26.9062	20.3125	-36.8438	5.6875	-19.2812	0.46875	-28.3125	0.00314	-16.1875	-4.25	-10.3125	5.875	31.5625	-17.6875	-18.375	-48.4688	-35.0938	8.40625	17.4375	-2.25	-3.78125	-9.71875	11.2188	-35.3438	12.8125	15.7188	16.7188	9.8125	-23.7188	0.00312	-18.3438	12.3438	3.4375	-28.125	-19.0938	-9.625	4.1875	-8.375	-7.125	8.96875	-6.0625	-10.4688		0.00312
0.00316	-25.4375	7	20.2188	21.7188	6.34375	-37.5	-38.8438	-1.125	-7.25	-13.7812	13.1562	11.0938	0.00316	9.21875	6.09375	15.25	1.59375	-4.90625	50.4375	11.1875	-22.0312	-14.5938	-16.625	-22.8125	5.65625	-9.96875	27.2812	15.6875	10.75	4.71875	1.4375	-7.03125	-19.7812	13.375	0.00314	0	-4.625	17.5625	-43.3438	-31.5312	-36.0312	-28.9375	-31.6875	-39.6562	4.9375	0.40625	-17.375		0.00314
0.00318	8.1875	-4.53125	-2.53125	-34.9062	-25.5938	-17.4688	-3.71875	11.3125	-22.0938	-1.28125	-16.2188	16.75	0.00318	-23.4062	-2.5625	-11.5938	-3.375	24.9688	-3.03125	-8.4375	22.4375	30.7812	11.7812	24.375	-7.71875	11.3438	-28.125	-5	-12.3438	46.2188	-1.96875	-2.9375	-22.9688	56.7812	0.00316	-4.84375	11.5938	18.9375	0.1875	-12.9375	-11.75	19.4062	4.28125	-15	-11.9688	34.9375	25.9375		0.00316
0.0032	8.78125	-2.5	10.2812	3.78125	-14.3125	15.2812	-29.9688	-15.25	28.75	7.4375	-24.6875	-35.75	0.0032	8.96875	0.5	-1.25	29.9375	17.9375	1.53125	-11.9062	-26	-22.4062	-25.2812	17.5	-53.875	-13.5625	2.53125	17.6562	-20.8438	-0.25	-25.5625	16.9375	9.46875	-42.75	0.00318	-16.7812	13.7812	-7.0625	12.0625	0.46875	5.0625	-24.75	21.125	-9	-9.1875	10.5312	-1.15625		0.00318
0.00322	-32	-1.0625	24.0625	-2.9375	17.25	-26.6875	-36.7188	10.0312	-13.25	-6.0625	-26.8438	-26.5312	0.00322	-18.375	-17	11.75	-10.9688	-32.8125	24.3125	-8.34375	-11.1875	7.90625	-25.4062	-35.0312	16.375	23.6562	31.3125	-28.5	-5	-10.9062	-10.1562	-4.9375	-10.625	15.2812	0.0032	8.53125	-12.7188	2.71875	-33.2812	7	-18.4375	0.59375	-7.25	-2.21875	-34.0625	7.0625	-41.9375		0.0032
0.00324	14.9375	4.09375	-5.375	-2.15625	-10	6.5	-5.25	-11.8125	-12.3125	-11.3125	5.1875	24.875	0.00324	-10.3438	15.375	-4.5	-9.15625	0.03125	-45	-2.90625	2.71875	22.4062	-23	16.5938	-14.8438	7.34375	-35.0625	-30.5625	52.75	37.75	-17.9062	-12.2188	-27.0938	30.4688	0.00322	27.125	14.625	6.71875	-2.90625	2.84375	17.625	22.9375	2.71875	-2.28125	12.6875	1.1875	-9.8125		0.00322
0.00326	-21.2812	12.5312	-33.0625	-5.65625	-11.9688	26.9688	16.4375	-15.4375	4.75	-20.2188	-1.0625	-1.3125	0.00326	3.71875	9.40625	-7.6875	21.0625	-11.4062	-15.5	-26.125	-0.125	-27.5	5.125	-31.5	-28.9688	-9.0625	3.90625	4.03125	23.5938	6.21875	-8.375	-12	8.9375	-19.6562	0.00324	-12.125	18.3125	-12.6875	11.9688	-2.6875	17.2188	-5.125	-0.59375	15.3438	-12.2188	8.6875	7.84375		0.00324
0.00328	-46.9062	-7.375	25.125	14.0312	0.03125	-19.75	-24.375	-17.6875	7.71875	0.9375	-6.96875	-26.9375	0.00328	-3.25	-17.9062	28.7188	-9.71875	-51.6875	6	6.4375	-14.9688	-30.0312	-3.1875	-51.0938	5.03125	-0.625	14.3438	11.125	17.1562	-5.5	-15.9062	-17.1562	-17.875	-9.5	0.00326	-22.0312	-3.03125	4.96875	-5.5625	6.59375	-29.5312	-17.0938	-21.75	9.375	-14	-18.8125	-28.5625		0.00326
0.0033	1.25	-30.0625	12	10.5312	11	-15.4062	3.96875	-12.9062	-24.0625	27.125	8.8125	-4.625	0.0033	2.375	3.34375	5.21875	-31.1562	5.6875	-27.9375	2.375	8.46875	15.0625	-6.34375	3	-0.84375	-15.6875	-11.7188	-14.625	10.5625	18.5938	3.15625	-10.9688	-11.625	36.5	0.00328	9.9375	7.9375	-23.7188	-0.3125	-25.3125	-4.1875	11.9062	-11.9062	-8.375	37.9375	-6.875	11.75		0.00328
0.00332	7.46875	6.1875	-25	-28.4688	26.4062	16.5312	-2.625	-20.7812	17.8125	0.59375	-16.7812	38.5625	0.00332	-1.46875	8.875	-21.875	-11.6875	-11.625	-22.6875	-19.5312	-2	13.0938	17.3438	5	-18.75	24.4375	1.125	-11.8125	-15.1875	-1.40625	2.90625	11.0312	-11.375	-7.65625	0.0033	-27.9062	-38.4688	-13.8125	-17.5938	10.2188	8.65625	2.84375	12.0625	-12.2812	-21.4375	18.8438	-14.0938		0.0033
0.00334	-24.5312	-8.5625	-9.0625	8.625	12.8125	8.96875	8.28125	14.6875	56.0312	-44.8438	-7.34375	-3.84375	0.00334	-16.0938	-17.9375	9.34375	9.03125	-9.1875	-7.3125	26.8125	-24.5938	-7.59375	-22.6875	-25.5312	18.6875	12.1562	-1.375	13.7812	-31.5312	-25.625	-6.1875	-1.40625	-1.3125	-8.90625	0.00332	-11.5	10.25	0.9375	-5.71875	15.0312	-13.5938	-15.2812	-1.6875	-15.0938	-6.6875	-34.875	8.78125		0.00332
0.00336	-24.9062	8.46875	5.5	-9.46875	28.2188	-13.7812	12.3125	3.03125	-15.6562	-7.875	45.5938	-1.25	0.00336	-11.375	-28.7812	9.75	-34.8125	-5.9375	-45.3438	3.03125	21.9688	54.5312	6.40625	-5.65625	15.4062	-18.125	-9.8125	-15.8125	30.75	-20.7812	2.0625	-30.375	-13.7188	4.0625	0.00334	7.46875	-16.1875	11.9375	8.28125	-3.25	-7.90625	-10.0938	-15.3438	-29.5625	17.6562	2.46875	2.09375		0.00334
0.00338	29.4688	-12.2812	-8.1875	-22.125	18.6562	-25	-17.75	2.40625	4.1875	30.9688	41.3125	16.3438	0.00338	-0.5	-0.875	-33.1875	11.5312	10.3125	6.65625	-38.2812	24.8438	-3.25	-5.78125	31.7812	-19.9688	8.71875	-34.125	31.5625	3.5	19.0625	-3.4375	2.25	0.65625	11.4062	0.00336	-13.3438	6.6875	-8	19.3438	-14.875	-18.1562	-0.4375	-8.53125	8.15625	-20.2188	41.7188	0.46875		0.00336
0.0034	-2.40625	-13.4375	-20.6875	18.2188	14.4375	-4.90625	-25.1875	14.7812	31.8438	-24.0312	-25.3438	-10.5	0.0034	-7.375	-20.625	2.09375	1.625	-11	15.8125	-1.6875	-13	-16.9375	-12.4062	-0.75	3.6875	-1.09375	29.7812	-1.78125	-20.1875	-11.125	-6.65625	-6.875	16.3125	-34.5625	0.00338	32.7188	-4.1875	11.6875	-0.78125	6.90625	-3.78125	-21.9062	-10.1875	20.9688	-6.21875	-8.8125	-15.2812		0.00338
0.00342	-3.03125	3.9375	4.53125	10.5625	7.84375	-14.4688	17.0312	6.65625	-1.90625	-13.4688	-11.9688	-17.375	0.00342	-13.1562	8.9375	13.4375	-10.8125	-45.4062	-43.125	21.5312	-2	56.8125	-21.4062	-7.21875	8.40625	-10.5625	-20.1875	-27.7188	22.5312	-24.0625	-10.75	-28.9375	17.25	16.7188	0.0034	1.5625	-8.09375	-3.09375	-0.46875	14.6875	-5.03125	8.96875	10.7812	18.4688	7.21875	-31.4375	-9.875		0.0034
0.00344	21.625	11.5625	-38.8125	-19.5312	-23.375	-1.03125	33.875	-8.40625	-9.71875	1.21875	27.8438	22.5	0.00344	32.9688	18.125	-48.9062	1.46875	25.1875	-22.7812	-7.40625	3.28125	6.125	21.4062	-11.1875	-12.8125	-17	-28.8438	-6.96875	12.9062	6.1875	-12.7812	9.46875	-33.3125	-11.9062	0.00342	-28.7812	1.21875	-28.2188	12.8125	17.4688	25.0625	-5.4375	-8.875	-14.0625	-12.4688	3.46875	5.59375		0.00342
0.00346	-26.5625	1.59375	-23.4375	14.4062	12.75	-1	-43.5	-1.65625	4.21875	-5.90625	11.1875	-3.71875	0.00346	-5.15625	-12.0938	-2.125	13	-3.59375	3.21875	-31.0938	-41.875	-39	-11.3125	-16.5	-12.9688	-11.7188	-10.4062	13.7812	-19.4062	-7.59375	0.8125	13.5312	-10.7188	-27.875	0.00344	18.5312	14.0625	1.40625	-12	-8.125	-1.78125	-6.5	0.8125	-3.9375	-3.84375	-32.625	-23.7188		0.00344
0.00348	-30.5	-23.75	34.2188	-13.125	5.59375	-10.4062	-1.09375	-7.09375	-8.25	-16.9375	-27.1562	-48.5312	0.00348	-18.8438	-23.1562	10.6562	-24.0938	-10.4062	-13.9688	2.71875	-21	11.875	-8.5	-4.65625	7.625	6.46875	0.59375	-17.1875	11.5625	-28.5625	25.375	-4.90625	15.1562	-21.5938	0.00346	-1.53125	-34.7812	-11.5312	4.375	40.2812	-0.5625	1.8125	16.9062	3.96875	19.25	-16.2812	19.5312		0.00346
0.0035	21.7188	10.1562	-22.0625	12.625	-19.5625	-33.7188	25.75	-3.625	-11.4375	-11.5625	-11.3125	-1.8125	0.0035	29.4688	4.6875	2.78125	-16.375	8.40625	-16	-20.8125	4.59375	29.4062	11.6875	-25.4375	-17.4375	-12.75	-12.0938	-27.375	0.21875	-36.8438	21.0625	-8	-7.5	1.0625	0.00348	-3.5625	6.625	-5.375	30.2812	-24.7812	-0.78125	-23.7188	-2.9375	-26.6562	-11.1875	19.625	6.53125		0.00348
0.00352	-1.84375	2.625	-23.5625	-14.8125	7.03125	-4.84375	-24.4688	-22.8125	-2.8125	1.34375	16	8.90625	0.00352	15.7188	-9.5625	33.25	35.7812	-14	30.8438	-24.25	-19.625	-40.2812	-23.4062	11.9375	-18.3125	-11.25	-16	17.9688	-15.5312	11.5938	-27.0312	19.0938	-12.9688	-10.2812	0.0035	8.28125	13.5938	-5.78125	-49.8125	4.40625	-0.8125	-20.625	-16	-15.0938	-15.3438	-29.5312	-18.4688		0.0035
0.00354	-31.6562	-7.34375	27.125	-10.9375	13.3438	15.75	5.15625	22.0938	2.875	-15.7812	-14.0312	-44.5625	0.00354	-56.9375	-13.2812	23.2812	-21.4375	-12.5625	-21.6562	15.25	-14.8125	16.5938	-27.4688	19.7812	9.625	-0.90625	24.0625	-13.625	-3.46875	-14.0938	12.7812	15.6562	23.4375	-8.15625	0.00352	-1.21875	-12.625	4.65625	-23.125	27.4375	6.59375	7.75	6.65625	26.4375	-10.5312	-5.96875	-9.9375		0.00352
0.00356	-14.875	-11.8125	-2.46875	5.3125	-20.2188	-11.9062	-2.59375	-16	13.0312	-9.3125	22.8125	-14.8125	0.00356	11.1562	-3.5625	-13.3125	32.4688	-14.6562	-5.28125	31.8438	15	8.46875	3.0625	25	-7.9375	15.1562	-22.125	-9.125	-22.2812	8.65625	28.7188	-21.625	10.7188	-19.7812	0.00354	-39.25	5.8125	-26.125	31.5938	-23.5625	-14.9062	15.125	-18.0938	-0.3125	-14.3438	21.0312	-5.40625		0.00354
0.00358	-75.5625	0.5625	-6.5	9.96875	10.375	-14.7812	-19.0312	-26	-33.4062	6.84375	-20.5	-1.65625	0.00358	0.59375	0.71875	2.96875	57.8438	-4.28125	10.7812	3.125	-1.5	-8.125	-12.8125	-23.0312	-14.5312	-3	2.75	39.5625	-22.6875	-24.2812	-25.2188	15.3125	-25.5625	15.4375	0.00356	9.9375	-5.1875	-25.1562	-24.8438	-22.625	-17.7812	12.9688	5.625	4.65625	30.0312	-13.2812	-30.9062		0.00356
0.0036	-30	-10	18.4688	-23.4062	20.9375	14.6562	-4.96875	-5.78125	-39.0938	-9.28125	-19.8125	-60.4375	0.0036	-45.7812	-24.4375	35.5312	-23.5312	-10.5	-5.5625	15.5	-1.75	-8.625	5.4375	-3.0625	-5.375	-14	35.7188	9.125	-22.2812	-9.875	-19.6875	-5.15625	2.5625	9.53125	0.00358	4.03125	-40.7812	-10.2812	-24.9375	19.9062	17.0938	1.1875	-13.6562	10.4688	8.15625	-7.15625	17.4062		0.00358
0.00362	4.21875	-2.9375	9.21875	-10.4375	-36.9688	15.5	21.1875	4.5	-27.125	-9.25	15.2188	1.46875	0.00362	-21.4688	31.6562	-6.09375	-10	12.1562	-44.875	-6.875	38.9062	-31.1562	3.90625	5.96875	-3.15625	-0.9375	-24.8125	-39.8125	-3.4375	-2	-12.9688	16.0938	1.28125	-6.5625	0.0036	-26.625	-10.0625	10.4688	25.1875	-1.375	0.8125	4.96875	41.5625	-14.1875	-29.2188	5.96875	38.8125		0.0036
0.00364	40.7812	-11.8438	-42.3125	-3.25	-33	-37.4688	-7.96875	0.9375	-8.25	-8.9375	0.15625	74.9062	0.00364	34.5	-7.71875	-23.9375	42.9688	8.15625	26.1562	11.9062	6.84375	-35.75	-5.03125	-13.0625	-7.0625	-26.6562	2.90625	-13.4688	-21.9062	6.625	0.28125	18.6875	-26	3.4375	0.00362	-28.9062	9.96875	13.1875	11.9688	-3.0625	-17.4375	-26.8438	-21.8125	-16	21.4375	11.8438	-48.5625		0.00362
0.00366	26.7188	-16.7812	-6.46875	-15.4062	-16.625	-26.0312	-45.0625	12.2188	-4.5	9.6875	-1.4375	-38	0.00366	-18.2812	-25.75	16.9688	-4.25	4.71875	26.8438	3.90625	-25.0625	-13.4062	-15.0938	5.1875	0.40625	6.375	7.09375	27.9062	2.1875	-13	-17.4688	6.46875	25.1562	-14.5312	0.00364	7.9375	-47.875	5.34375	-19.7188	-11.9062	17.7188	3.21875	-24	-16.875	8.15625	6.8125	6.625		0.00364
0.00368	-21.8125	6.59375	-4.75	-2.1875	-19.5938	28.625	-9.84375	-17.2188	7.78125	-11.0312	-7.375	-48.375	0.00368	-28.375	9.4375	-11	-28.1875	15.0938	-39.8125	-12	-1.25	-12.1562	9.6875	17.9062	-4.6875	-21.875	2.90625	-13.4062	34.3125	14.7188	23.5625	-8.65625	9.6875	-33.6562	0.00366	19.2812	-16.4688	4.21875	8.0625	-17.375	5.25	1.5625	-33.25	24.0312	-26.8438	-1.375	31.2188		0.00366
0.0037	-7.8125	7.28125	-7.21875	27.1875	-15.0938	-27.1562	-7.125	-16.4375	-10.625	-23.3125	24.4688	7.40625	0.0037	34.8125	-7.6875	-9.96875	58.0938	-12.9062	0.75	-7.78125	-14.125	-25.1875	-10.75	-10.4062	-23.9062	-21.5312	0.96875	-0.1875	-26.9062	25.625	16.1562	6.9375	-45.4062	-11.8125	0.00368	-23.7188	44.5	-15.4688	-6.375	-20.4688	-36.3438	-17.875	15.5312	-11.5312	18.0625	-28.8438	-39.4375		0.00368
0.00372	-0.625	-54.6875	29.5	-27.5312	6.0625	-37.2188	-8.375	8.65625	-21.4062	7.90625	-25.0938	-6.125	0.00372	-9.3125	-6.40625	-4.5625	-15.7812	6.78125	17.3125	-10	-11.625	-18.375	1.65625	-10.2188	-7.3125	7.71875	25.8438	7.53125	5	-27.7812	-51.125	10.3125	-4.3125	8.65625	0.0037	13.2188	3.625	-20.1562	-36.875	1.21875	-16.375	7.90625	21.5312	-14.8125	12.5	15.9062	-12.6875		0.0037
0.00374	52.6562	28.2188	-11.6562	-11.375	-1.875	12.75	-4.6875	3.25	15.8125	-0.5	-23.0312	-3.03125	0.00374	1.78125	12.75	-19.1875	-43.5312	1.78125	-36.7812	-6.71875	5.3125	22.4688	11.4688	-25.2812	-22.0625	-24.625	36.9062	-45.0938	2.625	-9.1875	-14.75	-1.6875	12.1562	-8.625	0.00372	5.875	2.0625	7.65625	7.75	11.1875	37.9688	7.625	15.5625	-20.3438	-34.5	4.40625	29.3438		0.00372
0.00376	33.2812	10.7812	-3.65625	17.7188	-15.7188	-1.21875	-25.125	-17	-2.5	-9.4375	27.6562	0.5	0.00376	-7.9375	21.9062	3.21875	38.5938	-31.1562	-26.375	10.3125	-32.0312	-7.0625	-26.9688	-9.625	-26.4062	-13.875	-44.25	-3.28125	-28.0938	8.75	7.84375	-10.2812	-45.5312	-12.2188	0.00374	-19.7812	2.25	16.125	10.4375	-19.5938	-3.15625	-40.2812	11.5	-9.40625	-27.3125	-16.3438	3.0625		0.00374
0.00378	-19.7188	-11.9375	16.9688	-11.7812	25.3125	-40.8125	5.53125	-17.2812	1.78125	-6	-19.7812	14.5938	0.00378	-21.4375	-28.9688	-0.65625	11.9375	-16.4688	25.9062	10.7812	2.40625	-7.75	-29.0625	-11.3125	11.7812	-22.9062	9.46875	4.84375	-19.625	-16.6875	-26	-12.5625	-10.2812	13.625	0.00376	22.2812	-25	2.46875	-1.4375	-14.6875	-16.9375	4.71875	-35.5312	-2.375	28.0938	-10.3125	-23.5625		0.00376
0.0038	1.21875	-4.96875	-5.46875	-26.4375	25.2188	23.6875	7.625	9.46875	-16.9062	17.625	-12.9062	-0.5	0.0038	-5.90625	-18.375	-25	-38.7188	33.5938	-22.25	-5.5	25.5	6.6875	5.59375	-8.40625	49.5938	15.3438	27.0312	-21.3438	8.34375	-15.5	-37.0938	-7.28125	23.4688	-15.0625	0.00378	38.25	4.09375	9.6875	2.375	20.5	33.6875	7.65625	23.4062	10.2812	-29.1875	-1.1875	0		0.00378
0.00382	-4.78125	7.90625	-5.5	-0.4375	-24.6875	21.4062	-34.5625	-3.28125	11.0625	-5.5625	-22.5938	-6.71875	0.00382	31	25.8438	-1.09375	7.25	-25.9062	-5.53125	-7.96875	-18.2188	-14.4375	-16.6562	-39.0938	-15.0312	-12.9688	-14.0312	16	-28.5625	18.4375	-14.5938	-7.75	-13.7812	-14.3438	0.0038	-36.9688	7.96875	-13.7812	-9.875	26	-13.2188	10.0938	11.1875	44.4062	8.65625	-31.125	-5.71875		0.0038
0.00384	-32.4375	2.03125	28.5312	15.2812	-12.5625	-34	1.46875	13.1875	7.65625	-12.5938	-0.96875	-27.4375	0.00384	21	-42.25	3.90625	0.09375	-4.125	2.8125	32.5625	-8.46875	14.2812	-11.7812	-6.21875	-16.9062	-5.25	7.28125	-9.875	-27.0625	0.4375	-4.375	-16.375	-38.6562	19.4688	0.00382	-37.5938	13.0312	17.0625	-12.4375	-14.25	-37.4688	-3.0625	-8.1875	-1.625	-11.3125	17.6875	-12.5312		0.00382
0.00386	14.25	-18.0625	-3.46875	-14.9062	40.9688	16.3125	27.0312	23.9062	-18	4.9375	9.375	-4.21875	0.00386	-32.0312	-10.9375	7.34375	-43.75	41.5312	-28.4688	-2.5	10	5.0625	3.09375	37.6562	34.4062	25.0938	26.1562	-9.78125	54.75	-15.5625	-8.8125	-14.6562	40.375	-9.46875	0.00384	20.1875	-7.75	-2.8125	5.8125	-11.25	30.375	20.6562	13.3438	-61.5625	-20.0938	5.84375	-0.15625		0.00384
0.00388	10.5	-16.5938	-36.9688	0.28125	-11.5312	10.6875	2.3125	8.625	18.7188	-11.5312	-10.75	26.4375	0.00388	48.5312	5.625	-31.125	-24.0938	9.46875	-7.78125	-7.1875	-12.6875	-33	9.3125	-8.5625	-33.3125	-7.6875	-35.4062	-6.9375	-6.03125	-12.1875	6.71875	-31.2812	-8	-5.6875	0.00386	-16.5938	-7.78125	-24.4062	-6.46875	10.6562	26.0938	14.6875	-14.6875	27.9375	17.7812	-17.1875	3.875		0.00386
0.0039	-62.0938	-12.3125	23.625	-4.28125	-36.2188	-16.7812	13.5625	-12.4062	-10.625	-4.40625	-17.75	-9.75	0.0039	2.03125	-19.8125	9.875	8.46875	5.90625	6.21875	40.7812	-28.3438	1.15625	-14	-24.25	10.875	-13.8438	-11.25	7.78125	-7.09375	-11.7188	10.8438	-5.4375	-17.75	-4.78125	0.00388	4.9375	-14.4375	-12.5625	-3.125	-33.4688	-44.1875	-2.28125	-4.125	-2.46875	-11.6562	13.9062	-15.25		0.00388
0.00392	2.90625	-21.2188	-18.875	-14.5	-17.125	-11.7812	10.9062	33.9062	-31.4062	-5.03125	-8.78125	11.375	0.00392	-7.34375	7.4375	-31.3125	-38.5625	0.03125	-38.4688	-11.9375	26.0938	32.3438	19.25	8.625	24.5625	19.9062	25.0625	2.78125	30.5312	-45.9688	-7.71875	13.7812	-4.75	16.625	0.0039	23.1875	-21.7812	7.75	10.125	-2.65625	-27.2188	18.5625	-9.40625	-19.1875	1.21875	26.75	12.4375		0.0039
0.00394	48	-2.96875	-37.1562	-27.5625	-40.125	23.1875	-26.2188	41.0312	-3.65625	19.0938	5.71875	-3.21875	0.00394	8.90625	-2.0625	-16.3438	-11.0938	26.625	-20.7188	-15.8438	7.78125	-50.125	17.375	29.9688	-42	8.40625	-25.5938	-10.7812	-5	-5.90625	14.5938	-11.375	8.5625	-30.4062	0.00392	-6.9375	23.0312	-29.0625	-28.9062	4.59375	16.4062	-36.5	0.84375	-1.6875	10.875	-30.6562	4.75		0.00392
0.00396	-1.1875	-1.21875	-0.0625	30.5625	-49.6875	-39.875	-37.5625	-3.5	8.25	-17.9688	9.28125	-31.0625	0.00396	12.8125	-18.375	-8.46875	5.15625	-33.5	49.2188	9.84375	-31.6875	-8.4375	-13.7812	-6.46875	-23.0938	-34.3438	-19.6562	26.6562	-46.9375	5.34375	0.6875	-37.3125	-15.6562	-11.4688	0.00394	-8.6875	-2.40625	-0.34375	-9.96875	1.5625	-3.625	-20.5	9.875	49.125	18.75	-7.09375	-5.15625		0.00394
0.00398	-35.4688	-28	15.3125	5.84375	7.125	-31.7812	36.5625	-18.8438	-11.4062	-18.625	-24.4375	17.7188	0.00398	5	20.3125	-25	-31.2188	5.53125	9.9375	14.25	6.59375	7.9375	-13.8125	-15.0312	10.75	16.3125	-13.9375	-18.5	-6.875	1	-6.71875	0.75	1.75	39.625	0.00396	32.2812	-18.9688	7.125	30.0312	-18.2188	-13.4375	10.4688	-17.125	-27.1875	-4.71875	3.6875	-7.90625		0.00396
0.004	1.78125	-10.875	-15.9375	5.84375	11.4375	4.9375	2.40625	14.1875	-25.7188	-3.28125	4.53125	46.6875	0.004	2.46875	7.6875	-13.0938	-16.25	26.5	-25.5625	-5.09375	14.3438	-45.0312	13.125	13.6562	4.96875	12.4062	-15.5312	-23.9688	22.875	-32.5312	18.4688	1.75	24.1875	-33.0938	0.00398	15.4688	7.96875	-23.125	1.5	-31.0625	-15.7188	-5.0625	-13.1562	-37.8438	-28.7812	-21.3438	-12.8438		0.00398
0.00402	5.9375	31.2812	-8.375	-20.125	-24.25	-29.8125	-55.6562	-1.84375	13.5625	-28.0312	-13.3125	-8.6875	0.00402	10.2188	-39.7812	26.2812	14.4062	1.71875	23.0312	-16.3438	-37	-33.3125	-4.40625	-11.8125	-38.7812	-28.9375	4.8125	17.9375	-10.9062	-8.78125	5.375	-21.4062	-18.0938	-22.5	0.004	-8.21875	3.40625	9.78125	-29.5625	22.125	0.9375	-0.59375	-19.4375	41.0625	-1.90625	-0.625	20.1562		0.004
0.00404	-33.4688	3.375	27	-9.96875	-12.6562	3.625	-16.7188	-21.5938	-36.5	-13.6562	-16	-13.8438	0.00404	2.125	1.5625	-13.9062	5.90625	-40.375	7.59375	12.0312	-4.1875	10.7188	-15.1562	-30.8438	0.1875	24.375	-1.8125	-3.59375	-22.2812	21.8438	-24.2812	-2.46875	-18.0938	44.7188	0.00402	-6.21875	-11.5	0.46875	6.96875	-0.375	18.3438	32.5938	16.4688	-0.34375	-3	-5.5	3.5625		0.00402
0.00406	21.625	-0.84375	13.6562	-12.9062	4.84375	14.5312	22.625	-32.1875	-18.5	-6.90625	-11.625	36.75	0.00406	-1.21875	13.125	13.2188	-29.375	9.09375	-10.6562	-24.375	25.9375	6.03125	-23.625	40.8125	30.375	-19.2812	-15.0312	-6.625	-15.9688	-24	2.03125	-13.0312	14.0625	-28.875	0.00404	-19.6875	3.65625	15.9688	22.5938	-5.15625	18.4688	-6.0625	-25.375	-9.90625	-35.875	-46.375	-10.8125		0.00404
0.00408	0.125	-1.09375	-6.375	17.5312	-7.375	-7.875	-18.3125	-6.28125	32.6875	-0.6875	-19.625	-12.75	0.00408	-19.5312	-13.7188	31.8125	17.2188	3.96875	8.8125	-16.1562	-15.2812	-8.375	-11.5625	-18.6875	-21.6875	-25.25	6.125	-7.78125	-31.125	-3.53125	7.375	-0.59375	-16.4062	-34.125	0.00406	-10.3438	11.1875	4.28125	-45.9062	8.09375	-15.375	-48.125	-5.46875	1.6875	-2.875	22.1562	-10.5938		0.00406
0.0041	-27.2188	-16.7812	13.4375	7.21875	29.0938	4.0625	3.75	4.53125	-40.7188	-8.09375	-25.0938	-32.0312	0.0041	-51.4688	-10.0312	-22.7812	5.65625	-48.4062	6.71875	-1.3125	-13.6875	10.2188	-17.8125	-22.1875	27.625	-5.40625	-11.4688	-0.78125	6.1875	24.2188	-5.6875	-1.8125	-29.4062	44.9375	0.00408	-1.90625	-1.125	-19.5625	-18.375	2.6875	-7.25	13.9375	4.59375	-10.7812	-10.9375	16.6875	-7.125		0.00408
0.00412	-10.75	-12.9688	-18.125	-23.125	5.6875	-33.6875	23.0938	-30.3125	-36.625	10.7812	16.75	14	0.00412	-12.5312	47.7188	-25.0625	-33.6875	2.4375	-32.4375	1.78125	34.6562	8.03125	6.5625	-0.96875	46.125	25.1875	-43.9375	5.46875	-2.34375	9	-44.3438	-8.75	8.5625	-29.3438	0.0041	-23.3438	-9.65625	-3.0625	2.59375	-30.25	24.9375	-14.875	-22.75	2.3125	14.2188	-18.0312	19.0938		0.0041
0.00414	16	2.6875	4.40625	-24.9688	24.4688	9.9375	-103.438	5.40625	21.4375	-0.1875	5.59375	7.78125	0.00414	5.1875	-4.78125	23.3438	14	14.1875	21.4062	-28.75	-15.9375	-22.375	9.625	2.0625	-16.5625	-29.375	6.21875	-3.28125	-37.4688	-25	-22.375	-6.90625	24.5938	-43.3438	0.00412	10.625	-14.0312	19.5625	-6.46875	6.3125	-2.0625	-0.90625	-14.9688	1.40625	22.5938	-4.71875	5.625		0.00412
0.00416	-28.9688	-11.2188	19.3125	11.75	-36.7188	14.9062	12	-31.4375	-32.0312	-14.625	-1.0625	-27.3125	0.00416	-22.2812	-29.625	2.8125	12.125	-20.0625	1.71875	10.3438	-11.0312	-28.5312	-13.3125	-13.5625	10.7812	12.375	23.2812	-10.4062	-3.90625	6.78125	-34.3438	0.9375	-31.5625	13.0938	0.00414	24.75	-2.1875	16.5938	5.15625	16.875	-16.6875	37.8125	-16.5625	3.40625	-8.3125	25.9062	-1.8125		0.00414
0.00418	6.5625	-1.4375	5.46875	11.4375	8.75	-0.65625	36.2188	-102.281	-4.125	2.40625	32	-2.3125	0.00418	-16.9688	14.7812	-17.6562	-25.25	10.75	-72.5	8.9375	8.15625	14.3125	11.9062	1.625	15.3125	46.3125	-13.9375	6.5	25.5938	-15.5625	-7.625	17.9062	-27.6875	6.71875	0.00416	-33.4062	-5.875	16.5625	10.6562	-5.4375	-2.25	-18.375	19.9062	-8	5.0625	1.09375	-0.625		0.00416
0.0042	28.0625	6.84375	-26.2188	2.5625	29.75	-49.2812	-5.78125	-3.28125	26.4062	14.4688	-8.5625	30.625	0.0042	5.5	-6.25	-40.5312	22.5312	13.1875	29.7812	-21.4062	-24.3438	-54.8438	6.28125	42.7188	-10.2188	-3.125	1.21875	12.9375	-18.5312	-0.8125	34.1562	-9.875	27	-49.9688	0.00418	4.15625	1.46875	10.6875	-4.65625	-16.7812	-29.4062	-0.78125	-13.375	-8.375	1.34375	10.5625	-15.4375		0.00418
0.00422	-19.5	-26.9688	6.96875	-18.5	-27.4375	-11.7812	-30.9688	27.0938	0.90625	-26.0625	1.34375	-14.0938	0.00422	-16.9688	-18.9688	5.96875	-8	-11.0312	-2.5	-7.3125	-19.875	-11.0625	-6.6875	-33.0938	16.1875	7.4375	16	-20.25	-17.2188	-2.46875	10.6562	-25.0312	-13.75	-9.5	0.0042	18.375	14.4375	-23.7188	-29.7812	12.3438	7.125	-2.625	7.53125	-8.96875	-0.3125	4.53125	-28.875		0.0042
0.00424	-0.75	4.125	-8.46875	10.3125	-32.125	29.3125	7.96875	0.1875	-21.5	-4.71875	18.5	-7.5625	0.00424	1.40625	13.3438	-1.28125	-8.3125	-14.6562	-56.875	10.0938	16.4062	17.8125	4.03125	-18.4062	8.1875	-24.1875	10.2812	-20.25	29.1562	9.21875	28.6875	24.2812	-7.09375	45.5312	0.00422	-26.7812	-6.78125	15.1562	11.3125	0.125	-9.96875	-25.9062	-19.0938	-0.8125	1.71875	7	-3.40625		0.00422
0.00426	10.9688	5.4375	-5.71875	-3	20.5	-13.8125	48	-14.6875	18.375	16.9375	6.09375	19.8438	0.00426	-7.46875	-9.21875	-10.5	16.9688	3.5625	16.25	-30.125	-11.6875	-18.1562	-26.875	9.09375	-19.7188	-25.9688	-29.4375	-4.5625	-14.2812	-19.2188	6.125	-0.53125	16.9375	-72.0625	0.00424	0.84375	4.59375	15.4688	3.8125	-29.9375	7.15625	-8	-23.9062	-19.1562	8.46875	-18.4375	20.6562		0.00424
0.00428	-2.5	4.34375	15.9062	0.5	26.0938	31.9062	-0.25	9.9375	1.15625	33.9062	-45.1562	-33.1562	0.00428	-23.5312	-18.4688	5.4375	-2.25	-19.4375	26.4375	-13.2188	-22.9688	-0.125	2.90625	-2.84375	12.4688	-40.6562	-17.7812	-11.7812	-15.2812	14.7812	-23.0625	-11.8438	-37.7812	14.2188	0.00426	17.3438	30.2812	-16	0.21875	-4.4375	-5.9375	8.9375	7.21875	-1.15625	12.0312	-37.3438	-13.4688		0.00426
0.0043	0.59375	-8.21875	-4.5	2.65625	-29.8125	27.2812	-8.40625	9.5625	24.3438	-32.7188	-11.75	-17.5312	0.0043	3.5625	16.3125	-7.96875	-29.375	-0.3125	-33.4688	-33.9375	11.9062	32.375	-4.625	-12.4062	-6.15625	-15.8438	-0.6875	-0.6875	17.5312	-8.71875	-47	-3.875	-31.8125	35.5	0.00428	-10	13.4375	-22.3438	34.125	-9.1875	6.53125	-9.40625	17.5312	-27.7188	-36	4.625	-13.7812		0.00428
0.00432	-20.9375	14	13.9688	2.34375	-3.4375	-5.84375	-10.0938	2.40625	22.9688	-2.84375	11.5625	3.53125	0.00432	25	17.9688	-28.25	-16	-13.25	-5	-26.7812	-20.1875	23.4688	-6.625	-11.4688	-14.9688	1.4375	-17.4062	-5.84375	-9.40625	-47.4688	2.0625	-24.8438	-8.34375	-31.375	0.0043	-13.7812	-5.75	28.875	-21.5938	3.0625	-16.2188	-8.9375	-10.625	-2.5	-13.5312	2.15625	8.03125		0.0043
0.00434	-25.2812	-10.3438	-1.90625	0.21875	37.375	-10.5	-20.7188	42.5312	-20.7188	2.4375	-21.7812	-9.21875	0.00434	-34.7188	-18.4375	-1.875	26.1562	-7.84375	19.9688	-16	-16.6562	-24.9375	-11.8125	-7.6875	-6.4375	-3.65625	-13.9688	-11.5312	-44.1875	-10.75	-33.5625	-20.375	-19.4062	-22.5625	0.00432	34.8125	17.4062	1.03125	21.25	30.2812	-31.7812	-32.8125	-35.0625	-2.1875	-1.5625	-18.6562	-4.59375		0.00432
0.00436	18.625	-10.8125	-0.25	-7.71875	-7.875	51.8438	16.125	12.5	-44.9375	-23.5312	-22.6562	-7	0.00436	11.75	6.5625	0.03125	-4.34375	-3.90625	-39.7812	7.1875	25.5312	18.0625	1.8125	0.75	-2.78125	12.2188	0.53125	-21.0938	10.5625	29.2188	-10.1562	-7.0625	-34.1562	12.2188	0.00434	-27.3438	-6.25	-32.8125	7.59375	-5.375	24.9062	7.0625	24.0312	1.34375	-8.46875	-32.0312	-5.46875		0.00434
0.00438	5.0625	-0.15625	1.84375	-1.8125	-16.8125	-18.125	-4.90625	-30.1562	17.75	-15.0938	4.1875	-28.0312	0.00438	-3.5625	-3.4375	-28.2188	9.71875	-21.0312	4.28125	11.1562	-13.4688	-5.875	1.5625	-18.4688	-11.5312	11.4062	1.21875	4.15625	23	-27.875	31.9688	-0.8125	-1.46875	30.375	0.00436	-15.7812	-4.8125	-25.75	-28.0312	-0.09375	12.5625	38.3125	-0.21875	1.46875	-0.6875	24.4062	10.0312		0.00436
0.0044	-18.1562	-6.03125	-8.53125	0.8125	-12.8438	-40.5312	-9.8125	19.5312	2.375	20.3438	-3.03125	15.6562	0.0044	-34.4688	-32.3125	-16.5625	-10.7812	-24.25	13.1562	0.78125	-7.5	-30.2188	-11.1562	-0.65625	-5.375	5.59375	10.25	23.9375	-28.6562	-36.875	-5.78125	-20	45.7812	-33.625	0.00438	26.375	-15.2188	-5.90625	17.1875	-10.625	-4.15625	-19.1562	-3.78125	0.5	-6.1875	2.5625	-2.75		0.00438
0.00442	8.03125	-2.09375	-11.2188	-19.375	-0.625	15.1875	12.4375	6.375	-22.5312	-9.53125	17.7812	19.4375	0.00442	-18.375	3.09375	25.75	-41.9375	9.75	-58.6562	-4.875	10.3438	-6.96875	20.6562	-6.3125	5.34375	4.625	13.5312	-24.1562	9.40625	4.0625	-3.5	-7.4375	7.09375	-1	0.0044	-4.90625	0.96875	-0.53125	1.4375	-14.0312	5.21875	-21.4375	23.6562	12.7812	-6.0625	-21	-35.5625		0.0044
0.00444	-0.71875	18.4375	-14.4688	-22.8438	-0.625	30.125	21.9688	-60.7812	-6.71875	-16.7188	9.96875	-7.40625	0.00444	23.1875	-12.5938	-2.90625	-1.09375	-1.4375	-6.375	0.9375	0.15625	-18.75	6.0625	11.5938	-30.8438	-3.5	-10.9375	-19.5625	13.5	-13.2188	9.5625	1.78125	-21.9375	-7.96875	0.00442	-24.625	-3.46875	-4.9375	-7.15625	11.8125	0.28125	-4.875	-12.3438	-7.96875	31.0625	-0.8125	19.7188		0.00442
0.00446	-54.2188	-44.6875	-14.0625	12.7812	-2.125	-19.6562	-6.625	0.3125	-14.9375	17.9688	11.8125	-31.2812	0.00446	-22.1875	-39.375	-25.625	-12.1562	-12.4375	46.125	2.125	-40.4375	-14.9688	21.3438	12.2812	-9.9375	-2.0625	-10.7812	15.6875	-7	-2.5625	12.625	-4.96875	25.9062	-28.9375	0.00444	16.9375	13.75	28.2812	3.03125	4.40625	2.4375	10.4688	-12.875	-31.0938	-16.4062	16.0938	5.21875		0.00444
0.00448	-10.8125	-18.25	18.3125	-11.8438	17.0625	-34	4.0625	36.1875	12.4375	6.65625	-6.09375	-0.65625	0.00448	-5.375	-18.8438	26.5625	-33.6562	-9	-47.2188	-7.03125	4.09375	-16	-5.15625	-0.375	22.5938	-15.2812	1.71875	-22.1562	-9	-15.7188	-18.9688	6.9375	-18.2812	-10.9375	0.00446	-4.5	-21.2188	-7.75	22.9375	-38.7812	19.875	-32.1562	-10.375	40.4375	-11.4375	-22.125	-0.625		0.00446
0.0045	33.6562	10.0938	10.6562	-22	-24.7188	-6.71875	-21.8125	3.96875	15.9688	-64.4375	11.4062	2.9375	0.0045	38.75	0.875	-11.25	-16.4688	10.25	0.1875	-18.1562	1.1875	-10.4688	-5.5	11.5625	-4.875	1.9375	-16.5	1.4375	-5.5625	-25.5312	14.4688	-0.4375	-14.25	16.4062	0.00448	-3.65625	-18.1875	-40.125	-36.2812	-39.8125	-14.9688	-20.5	-14.7812	0.0625	28.5625	-14.125	4.8125		0.00448
0.00452	1.59375	-5.4375	1.59375	6.875	-39.7812	-27.0312	-7.78125	-42.5	-7.875	-40.875	-15.0312	-8.8125	0.00452	-1.46875	-19.75	-36.0312	52.4375	-33.625	62.5	16.125	-17.5625	6.40625	-7.75	-12.375	-5.25	6.40625	-23.75	14.2188	-2.6875	4.4375	23.5938	-20.25	7.3125	-30.2188	0.0045	-13.2812	6.5625	9.5	-2.96875	27.0312	-2.84375	27.8438	-20.0938	5.59375	-14.4688	2.78125	-17.2188		0.0045
0.00454	6.1875	-26.0312	12.875	4.21875	-16.2188	2.5	-0.625	-17.3125	-54.3125	9.375	-0.3125	-3.21875	0.00454	-30.5	15.0312	-11.9375	-33.7812	2.90625	-23.2188	9.65625	-7.4375	-5.96875	3.96875	-7.34375	-17.5312	-0.84375	2.3125	9	-17.625	11.5938	-35.9375	11.8125	10.7812	-3.03125	0.00452	17.0938	-17.0312	10.8125	12.9062	27.2812	33.0938	-16.9062	24.5312	5.15625	-25.5312	-8.875	6.90625		0.00452
0.00456	24.8438	-18.625	-5	6.125	-5.375	29.5312	-26.9375	20.3438	-12.125	-8.8125	7.03125	-14.6875	0.00456	13.7188	-4.3125	-5.5	-30.4375	10.9688	-32.4688	-12.0938	1.90625	-4.03125	-16.5312	-5	-3.9375	5.28125	-5.125	1.59375	-7.9375	1.78125	-0.21875	23.75	-8.9375	-7.78125	0.00454	3.90625	-24.6562	-9.15625	-49.0625	0.03125	-41.3438	-4.28125	-27.0625	-10.1875	-9.34375	-1.0625	-11.0625		0.00454
0.00458	-13.6562	12.2812	-27.5938	0.375	10.0938	-41.4062	-45.3125	9.40625	31.9688	12.2812	-16.3125	-30.0938	0.00458	-24	-4.8125	-14.5	50	-12.3125	42.8125	-4.5625	-24.8125	-26.4062	-25.125	23.7812	-1.6875	-0.65625	-22.8125	-25.0938	0.34375	-9.5625	11.4062	-6.59375	-8.125	-0.59375	0.00456	15.25	30.0312	-14.1875	-10.5312	-11.4688	-24.0625	4.5625	-8.5	10.6562	9.28125	9.21875	5.09375		0.00456
0.0046	-7.96875	-23.5625	-17.6875	-7.28125	26.6875	-27.8125	19.3438	-8.78125	-30.6875	4.46875	-4.28125	-5	0.0046	-19.125	8.96875	-4.25	-16	-15.0938	11.3438	-17.9688	11.1875	11.4375	-2.3125	7.625	-21.625	-7.5	21.0938	-21.9062	-23.125	-0.65625	-14.0625	-0.0625	8.9375	-22.1562	0.00458	24.25	-12.0312	9.59375	12.4062	-14.8438	23.2812	14.2188	32.6875	4.9375	-21.2812	-10	7.15625		0.00458
0.00462	2.1875	7.75	19.4062	-9.3125	10.8125	47.4688	0.65625	-30.25	-14.7812	0.53125	12.8438	-1.1875	0.00462	12	23.6875	36.125	13.0312	6.15625	-46.8438	8.4375	16.7812	-1.03125	-1.4375	-5.96875	-8.59375	-17.8438	6.90625	39.9375	-21.875	11	-25.9062	13.8125	-38.0938	-10.4062	0.0046	4.25	-5.8125	-9.96875	2.53125	-10.3125	-10.5938	-26.6562	-16.3125	-1.1875	-6.125	-24.8125	-12.0625		0.0046
0.00464	-8.40625	62.0938	26.4688	15.1875	-1	-19.25	-34.875	-25.9688	20.7812	-10.25	-81.5625	-24.1875	0.00464	12.0625	20.8125	-27.6562	13.4062	-35.9688	40.2188	-26.7188	-33.8438	-10.6875	-10.6875	-14.625	-16	17.375	-23.25	12.2812	0.84375	4.15625	19.0625	-20.5312	12.9375	6.96875	0.00462	-4.34375	20.7188	-23.2188	-28.9062	15.1562	-11.75	7.15625	-16.7188	-10.2812	19.875	-21.6875	-23.375		0.00462
0.00466	-50.5938	-48.3125	19.0312	12.9688	-2.5	-7.65625	6.34375	-12.8125	-33.2812	13.0312	21.375	-6.71875	0.00466	-17.4688	2.3125	-20.875	-36.7812	-13.7188	4.59375	-9.5625	30.4062	-27.5312	-36.5	-15.4062	-2.625	-0.625	11.5938	6.8125	11.9688	-2.375	-16.0312	-22.5625	6.5625	1.96875	0.00464	-27.7812	4.8125	30.3125	21.6562	17.375	12.6562	23.9062	27.75	-18.7812	-27.875	39.2812	-31.4375		0.00464
0.00468	17.375	-25.0938	-6.125	-10	-6.15625	9.03125	31.3125	5.375	4.71875	0.125	14.0312	10.9062	0.00468	-17	35.4062	13.9375	-42.5312	-11.5312	-48.375	7.25	22.8438	-3.40625	28.5312	-12.375	-5.15625	-1.34375	0.25	20.9375	3.15625	6.75	-66.3438	17.5	-14.1875	-20.1562	0.00466	-4.3125	-19.5	15.9688	4.1875	-30.6562	10.375	-31.6562	-24.75	-5.15625	-12.875	-24.4375	25.0312		0.00466
0.0047	4.5625	30.5938	-15.4062	7.125	-8.9375	-3.625	5.1875	26.2188	47.5625	1.25	-35.5625	9.09375	0.0047	12.6875	-12.9375	14.3438	19.9688	0.8125	-3.53125	-3.59375	-25.125	-8.5625	3.3125	-28.2812	-17.625	4.03125	-21.0625	5.96875	-22.9688	-19.6875	28.25	-27.625	2.75	-2.21875	0.00468	1.09375	7.3125	-42.5	-6.15625	-15.7188	-40.8125	5.84375	-24.375	0.5625	24.75	-1.9375	-5.375		0.00468
0.00472	-2.9375	16	-6.15625	28.4062	-18.75	-27.2812	-5.9375	-14.6562	-34.9688	1.875	29.5312	-26.8125	0.00472	-31.0625	1.28125	-10.125	23.0312	-9.03125	-1.53125	-7.375	-10.8125	-0.5	-29.9688	-11.2812	10.625	-7.65625	4.53125	-4.53125	22.4062	-15.7812	-26	-15.5625	0.53125	17.8125	0.0047	-9.4375	15.3438	3.65625	23.9062	0.28125	-10.3125	9.1875	26.4688	-13.2812	-14.375	15.2188	-5.84375		0.0047
0.00474	50.7812	15.1562	-20.7188	11.625	-1.1875	5.1875	4.5	7.125	-10.9375	28.5	36.3438	-1.1875	0.00474	-15.0625	13.4375	-3.96875	-41.7812	13.0938	-30.5	-9.96875	23.6562	-15.5312	24.4688	-9.3125	0.28125	-0.09375	13.6562	-15.125	-10.75	-12.4688	-14.625	9.5	6.0625	-31.0625	0.00472	-2.15625	-19.5625	17.2188	-21	-13.7188	-21.5625	1.59375	-16.5625	-24.0312	-8.4375	-20.5	6.5625		0.00472
0.00476	-15.9375	3.03125	-0.625	3.03125	8.09375	20.7188	-32.0938	16.8438	27.4062	-1.71875	-8.5	-6.125	0.00476	-3.5	-14.2188	-7.875	16.5625	-8.53125	14.1875	-10.875	-36.4688	0.96875	-21.2812	-6.96875	-24.1875	-19.0312	-35.9062	14.0312	-31.5938	14.2188	1.15625	29.5938	-8.5625	-11.5312	0.00474	0.21875	-32.9062	-5.4375	-5.21875	9.65625	5.0625	-24.2188	-45.5625	30.0625	33.3438	2.0625	6.53125		0.00474
0.00478	-16.625	1.34375	7.125	33.7188	-4.21875	-14.8438	9.5625	2.90625	-6.09375	-9.40625	-5.25	-20.9375	0.00478	1.09375	4.84375	-15.3125	1.65625	-2.6875	7.90625	-1.78125	-26.2188	4.6875	-20.3438	-9.65625	9.96875	-33.9688	-14.25	-3.78125	10.6875	-14.0312	6.625	-25.0312	-0.6875	15.0938	0.00476	12.5	22.2188	-20.25	-0.78125	-6.21875	22.0625	22.8125	-27.8438	-13.75	2.375	24.8125	0.65625		0.00476
0.0048	-13.6562	4.53125	-17.6562	16.5938	-4.96875	-0.75	13.625	-13.0938	-28.9062	-13	35.4062	30.4375	0.0048	6.84375	-9.53125	6.5	-12.875	25.4062	-39.7188	0.78125	22.5	18.0312	27.4688	3.1875	-0.09375	12.2812	9.71875	-2.46875	20.1562	7	-48.6562	-1.9375	-15.875	0.5	0.00478	-10.6562	-4.59375	24.8125	3.1875	10.0625	-10.625	6.75	35.5312	-5.8125	-14.4688	6.21875	-28.0312		0.00478
0.00482	6.5625	-17.4375	-12.625	-14.4062	0.40625	-32.4375	-22.2812	-9.90625	9.625	-31.25	-12.8125	-11.1562	0.00482	-18.1875	-2.53125	-15.9375	25.0938	-4.5625	-5.3125	-11.5938	-35.125	-15.1875	4.78125	8.3125	-17	5.78125	-1.4375	-6.75	-22.8438	0	1.75	19.5312	-25.0625	-40.0938	0.0048	6.625	-33.2812	-8.875	3.96875	8.71875	2.6875	-17.0938	14.4375	16.6875	-13.9062	12.3438	-10.4688		0.0048
0.00484	-31.625	-12.75	49.7188	-7.0625	-0.8125	-9.8125	-23.5938	19.6562	10.5938	-0.8125	-1.15625	-34.3438	0.00484	-1.4375	0.65625	-15.75	-8.875	-17.125	28	-19.375	-15.8438	-3	-9.65625	3.25	-7.5625	-26.3438	-24.5625	-18.3438	-8.28125	-11.875	22.2812	-28.25	-29.4688	23.1562	0.00482	-13.6875	2.78125	-18.7812	-7.78125	-23	-30.1875	-4.4375	16.6562	-24.6562	-12	11.1562	-11.2188		0.00482
0.00486	15.375	41.875	-11.75	35.125	-2.5	0.59375	25.9688	18.4062	-4.78125	-7.8125	7.84375	-99.2188	0.00486	-9.53125	17.3438	-2.34375	-28.6875	-1.25	-26.125	2.09375	36.4375	10.3438	-10	-1.25	9.4375	3.9375	-0.9375	-8.5625	29.8438	-15.4062	-48.875	-3.4375	11.7812	19.3125	0.00484	14.1562	3.53125	5.46875	-15.6875	-23.9375	36.875	-26.25	-26.5312	-16.7812	3.0625	-29.1562	9.65625		0.00484
0.00488	35.9375	-14.0312	-12.125	24.2188	-5.03125	-13.3125	23.9375	-6.4375	20.375	-19.9062	-40.0312	-1.5	0.00488	14.9688	-19.25	-8.5625	-4.46875	-4.09375	-18.5	-4.375	-10.1562	2.625	10.9062	-13.375	-22	26.9688	-14.0312	30.8125	-37.6562	-5.875	19.3438	32.1562	-4.40625	-20.4688	0.00486	-23.3125	20.7812	-26.0312	-6.0625	28.875	41.4688	17.75	9.6875	12.0312	-0.53125	-9.40625	9.125		0.00486
0.0049	-26.25	-32	22.5312	-49.7188	2.4375	3.4375	-38.9375	30.4062	-24.5312	-12.8125	-37.375	-12.5312	0.0049	-3.5625	-20.7812	1.5625	12.9062	-13.875	11.4375	0.75	-37.0625	-0.78125	-14.5625	-10.5312	-30.7188	-6.25	-5.6875	-1.59375	-12.4688	-4.34375	46.2812	-49.4062	-14.625	-0.4375	0.00488	-25.7812	22.3125	-32.4688	7.9375	-5.96875	6.46875	7.5625	23.8125	-8.125	-14.5312	-5.125	3.90625		0.00488
0.00492	-10.3125	3.84375	-6.8125	-7.46875	-32.3438	-0.4375	2.0625	-22.2188	-29.1875	-3.6875	33.2188	20.0938	0.00492	-14.375	12.9688	8.3125	-23.0312	-15.0938	-20.875	-24.5	37.7812	8.46875	6.28125	-16.0312	10.4062	-12.0312	17.9688	-37.625	14.7812	-22.4062	7.25	-17.2188	16.6875	18.1562	0.0049	2.65625	14.4375	22.5312	-8.5625	-3.65625	-10.4688	0.625	-16.2188	-31.5312	9.375	-5.15625	-27.4062		0.0049
0.00494	-0.5625	11.3125	-5.625	-15.625	-11.0938	-15.9688	-13.5938	-38.2812	3.90625	-14.375	25.375	27.6562	0.00494	-14.3125	-2.5	-5.375	-13.1875	17.8438	-13.75	15.4375	14.3125	7.28125	9.71875	12.4375	-5.8125	18.6562	11.4688	28.7188	-17.9375	12.2188	2.71875	22.6875	41.4375	-8.25	0.00492	-1.0625	-43.4688	-24.625	20	2.6875	-6.90625	19.5625	-15.9375	29.5938	-7.15625	1.40625	-7.5625		0.00492
0.00496	-22.4375	-42.4062	36.9688	-32	2.125	-23.5	-3.96875	-3.15625	-18.7188	13.9062	-14.75	0.6875	0.00496	-3.40625	-33.9688	-4.6875	8.46875	-29	44.5625	34	-22.4375	-3.0625	2.125	-10.4688	-14.8438	0.84375	-18.9688	3.6875	9.9375	-21.4375	36.4688	-32.1875	12.9062	-7.90625	0.00494	6.84375	-3.71875	-4.75	2.65625	2.03125	0.125	-29.125	-1.65625	37.1562	-4.8125	-15.7812	33.3438		0.00494
0.00498	9.0625	-12.5312	3.09375	3.96875	-5.0625	1.90625	28.0312	20.4375	-9.8125	-7.25	0.875	2.03125	0.00498	-2.21875	1.4375	16.5625	-39.875	-16.1875	-27.5938	16.5938	7.3125	3.96875	-27.7188	-15	14.2188	-7.625	6.96875	-23.8125	17.1875	-20.2188	15.7812	-14.25	4.6875	-3.40625	0.00496	-11.0625	3.125	14.9062	-13.5312	-9.1875	-11.3438	-28.7812	2.1875	-27.9688	-11.2812	-36.9375	-19.1562		0.00496
0.005	-2.25	20.4375	-1.375	-12.625	-12.6875	18.75	-2.5	-42.9062	-12.8438	-4	-15.7812	13.75	0.005	-8.8125	-15.75	2.25	-7.53125	37.25	-10.3125	-26.5312	7.875	-27.8438	10.7812	40.3438	-17.4062	46.7812	-2.125	19.375	9.96875	-6.59375	-16.2812	27.0312	16.2188	-26.8438	0.00498	-3.4375	-27.6875	3.28125	-11.9062	-21	-1.28125	12.9688	-6.90625	20.9375	11.0938	14.5312	-19.1875		0.00498
0.00502	-16.2812	-21.0312	-6.03125	-28.5625	-11.6562	-38.9062	-7.9375	-6.3125	-30.0938	20.125	1.21875	1.96875	0.00502	-14.0938	-22.5	-9.9375	2.34375	-5.53125	38.5625	4.5625	-26.1875	-32.0312	-2	-7.0625	-22.2188	-18.75	4.71875	-39.1875	-25.25	-12.8125	27.9062	-2.25	23.7812	-0.6875	0.005	2.53125	-14.25	-41.7812	-3.71875	-0.9375	21.9062	23.1562	21.1562	0.96875	-13.8125	15.75	9.59375		0.005
0.00504	-1.4375	-7.65625	-27.2188	-8.71875	12.8125	1.21875	12.5312	14.7188	-24.8125	-7.03125	20.2188	-23.6562	0.00504	16.4688	8.21875	6.65625	8.09375	-0.5	-24.8438	18.7188	-12.6562	26.1875	1.96875	-23.4375	11.9062	-29.3125	-5.03125	0.0625	4.75	14.7812	17.0625	-30.0938	-9.5	12.375	0.00502	-2.40625	7	2.375	-3.46875	-25.5312	-9.6875	-20.0312	7.15625	-27.5938	-3.21875	-42.7812	-12.4688		0.00502
0.00506	23.2188	20.25	-1.71875	20.6562	-33.625	-2.28125	21.1875	-6.59375	30.3438	-14.875	-21.9062	8.46875	0.00506	-16.875	-6.03125	-12.9375	-18.4375	6.1875	-15.6875	1.4375	7.59375	-0.4375	-2.125	8.71875	17.5625	5.3125	-3.03125	11.0312	9.96875	0.0625	-12.9688	38.3438	-20.9375	-32.5938	0.00504	-4.125	0.9375	23.1562	-23.1562	-4.40625	-10.6875	-6.84375	-42.2188	-29.0938	31.8125	-2.90625	-20.2812		0.00504
0.00508	-17.25	-43.2812	23.5938	-20.5312	-14.4375	-36.4375	6.125	14.3438	17.9688	-23.5625	-15.3438	13.5938	0.00508	-1.6875	-14.3125	-34	16.2188	10.0938	28.8438	-9.9375	-40.8125	-45.5312	16.3125	24.5	-20.0312	-10.5938	-0.75	-11.6562	-33.5625	10.6875	19.75	5.59375	10.875	-8.125	0.00506	-16	25.9375	22.3438	5.96875	-1.53125	-4.65625	32.375	10.6875	6.84375	-29.4062	40.7188	42.0625		0.00506
0.0051	-12.6562	-17.625	9.78125	-9.46875	23.25	7.34375	-7.5	20.2188	-1.59375	41.9062	-0.125	10.5938	0.0051	-0.5	8.5625	25.5	14.8438	-22.875	-9.25	-22.5938	-15.1562	12.1562	-25.2188	-19.625	-17.7188	-53.5938	-18.4062	-41.9375	-3.375	-0.90625	2.59375	-32.6562	-6.46875	30.3438	0.00508	-0.3125	-6.125	5.5	13.5	20.9688	-20	-39.5312	-6.375	18.0312	-34.8438	-10.5625	12.0625		0.00508
0.00512	30.7188	-1.84375	19.2812	13.75	4.03125	18.2812	-23.8438	-25.25	-1.15625	29.0625	-12.1562	16.4688	0.00512	13.9688	28.375	-0.4375	-5.96875	1.78125	-36.375	-9.03125	44.4688	2.8125	-36.2188	-1.40625	-19.5312	-17	-8.78125	-12.0938	-14.0625	0.625	-17.125	10.7188	-20.125	-42.7188	0.0051	-9.71875	-15.0938	1.25	-20	1.0625	-14.5	10.8438	-20.625	-19.5	32.8125	-3.5625	-11.1875		0.0051
0.00514	-4.78125	30.4688	-5	11.5938	-4.1875	-23.75	-32.1875	-16.875	11.2812	4.28125	-16.8125	-18.4688	0.00514	-12.5312	-20.5938	-29.2188	8.15625	1.5625	45.5625	-22.1875	-12.8125	-21.5312	-1.9375	18.9688	16.3125	21.5312	-0.25	35.5938	-9.90625	-10.3438	-15.7812	13.5312	-13.6875	-31.375	0.00512	-5.9375	-9.40625	-10.75	-18.0938	-1.625	-4.78125	27.5625	0.0625	-51.0938	0.65625	-5.875	-17.625		0.00512
0.00516	-0.78125	-16.9688	-5	4.6875	1.96875	-2.8125	16.4688	10.3438	-2	42.9688	17.4375	-3.125	0.00516	-19.875	-14.7188	18.75	-14.3438	-29.2812	2.90625	-5.1875	-6.53125	0.09375	-15.4062	-21.2812	-18.4375	-34.125	-3.6875	-54.4688	4.28125	-7.6875	-12.1562	-25.4062	-28.7812	9.46875	0.00514	-4.46875	-6.0625	26.4688	-2.125	14.7812	-10.8125	-16	12.7188	5.0625	-40.75	-9.03125	-26.1875		0.00514
0.00518	4.78125	13.5938	15.2812	-2.28125	5.3125	55.2188	0.96875	-2.53125	-21.5625	3	10.75	31.375	0.00518	11.0938	-24.4688	25.5625	5.1875	-10.6562	-54.1562	24.3125	26.0938	26.4375	-0.59375	-7.21875	-23.75	10.4375	-18.125	5.78125	-20	6.9375	-43.6875	-1.25	-6.375	3.5625	0.00516	-16	-7.875	-7.0625	7.0625	2.5	1.25	-25.7812	0.0625	29.25	-26.8438	-21.7812	5.0625		0.00516
0.0052	3.8125	27.7812	-3.21875	6.09375	-4	23.1562	-23.3438	-31.3125	23.4375	-10.7188	-22.9688	-37.4062	0.0052	-11.3125	-13.3125	-26.8125	1.9375	1.9375	12.0625	-40.4062	-27.5938	-39.25	6.625	26.9375	6.375	22.375	29.375	38.9688	-22.375	4.65625	-17.4688	-17.4688	-18.125	-25.6562	0.00518	-16.3438	24.375	-17.8125	-20.2812	-5.96875	6.59375	20.8438	-32.6875	5.1875	43.7188	18.4375	-2.25		0.00518
0.00522	-33.4062	-45.9062	-16.5312	-8.3125	4.59375	-10.8125	17.1562	14.3125	-24.4375	13.375	7.6875	-35.625	0.00522	-21.4375	-5.21875	2	6.1875	-22.125	1.875	-0.28125	-16.4062	-4.1875	5.5	15	18.4688	-13.5312	-12.5938	-0.1875	6.34375	-8.78125	-19.9062	-10.4375	9.84375	3.28125	0.0052	1.5625	28.9688	-20.5	-15.4062	0.40625	-11.4375	-4.375	9.46875	-15.1562	-21	-4.96875	-9.875		0.0052
0.00524	0.3125	3.71875	-21.2188	-21.7812	5.15625	-4.59375	2.40625	-6.84375	-9.25	0.84375	-2.09375	4.1875	0.00524	-24.0625	-5.1875	-1.0625	-23.4062	-11.9688	-37.2188	19.5938	9.03125	31.375	2.71875	-12.2188	-9.8125	-29.8125	-5.625	1.6875	6.78125	-2.90625	0.8125	-1.59375	3.6875	9.71875	0.00522	4.96875	-3.875	16.625	27.5625	-1.25	-5.46875	-28.8125	-15.25	-0.09375	8.125	1.71875	48.9688		0.00522
0.00526	1.09375	15.0625	10.375	0.125	-13.125	-23.9688	15.375	-4.5	32.625	-0.09375	-31.9062	-0.15625	0.00526	-13	-20.2812	-51.4062	-11.625	0.40625	13.0625	-23.1562	-34.125	-24.4688	11.9688	7.65625	10.5938	24.5	10.5	23.4062	-14.1562	-23.875	-15.0312	-1.65625	-33.3438	-34.7188	0.00524	0.15625	-23.625	9.625	5.4375	-1.875	-17.875	3.59375	-9.90625	-23.4688	30.9688	3.40625	20.3438		0.00524
0.00528	-24.375	-36.9062	5.9375	-24.25	2.9375	-12	1.75	38.0625	-50.7812	-8.40625	20.6875	-16.5	0.00528	19.0938	-8.78125	15.8438	-3.03125	8.5625	-2.8125	-16.6562	-14.2188	-5.5	1.21875	2.59375	1.21875	-30.2188	2.84375	-25.375	1.5625	-27.7188	-5.875	-12.6562	-4.65625	16.5	0.00526	26.4688	-17.375	-0.4375	10.3125	-8.75	-1	-11.9688	9.96875	1.1875	-8.65625	-10.5625	-26.1875		0.00526
0.0053	17.25	-27.2812	-28.5312	-32	17.9688	30.8438	3.8125	3.0625	-2.21875	20.9062	27.8125	5.15625	0.0053	1.4375	-18.5625	11.6875	-16.625	-15.625	-22.4688	8.84375	29.3438	30.6875	-12.5	-20.9375	-15.375	-23.5625	-18	-41.3438	27.375	-0.34375	11.0625	3.5	-3.28125	11.5938	0.00528	-12.5312	-6.65625	11.125	-7	40.1562	11.625	-13.4688	10.0312	10.1562	6.15625	-7.78125	-0.9375		0.00528
0.00532	-3.90625	-10.9062	18.25	5.40625	-10.125	-41.3125	-34.6562	-9.90625	16.8438	-26.5625	-41.6562	19.1875	0.00532	3.875	4.46875	-32.4062	9.6875	-1.625	1.53125	-5.4375	-2.25	-36.1562	-5.4375	-8.96875	11.625	59.2812	-9.9375	17.0938	-6.28125	-5.625	-30.375	-26.3125	-4.3125	-22.0312	0.0053	-11.9375	24.4688	-4.40625	-12.5	-25.5625	-11.1875	4.96875	-1.71875	-12.0312	-19.875	16.5625	4.6875		0.0053
0.00534	-4.9375	11.5938	0.34375	29.5	-31.8438	-7.96875	4.21875	-18.5938	3.9375	-23.0938	-4.8125	-2.40625	0.00534	-12.7188	-1.6875	-9	-9.15625	-7.59375	27.4375	-14.9062	-40.4688	-29.0625	12.5625	31.9688	-6.59375	-9.15625	3.59375	-14.625	-12.125	-18.7812	0.71875	18.3438	-18.8125	5.65625	0.00532	24.9062	14.4062	-8.15625	12.8125	-16.75	-7.4375	-0.125	-9.90625	-4.8125	11.1875	-23.8438	-6.25		0.00532
0.00536	-1.125	-21.8438	-8	1.90625	-0.09375	32.0625	35.9375	-21.7188	6	-14.0312	20.7812	-3.6875	0.00536	22.3125	-14.4375	19.0625	-25.625	2.53125	-22.3125	19.8125	33.7188	62.1562	-7.125	-11.625	-1.3125	-21	-1.5625	-16.2812	13	-13.875	10.4375	-20.7812	3.6875	11.9375	0.00534	-0.15625	-39.5312	-16	5.875	25.4375	25.3125	-25.0938	46.125	33.5938	10.0938	-9	-10.25		0.00534
0.00538	9.5	1.59375	14.1875	-3.53125	6.84375	-20.9375	-36.1562	1.75	9.625	-38.2812	-26.3438	-16.3438	0.00538	13.5625	-14.5312	-29.3438	18.0938	-5.1875	-17.75	-11	-7.84375	11.4062	-15.5	-16.625	-2.9375	8.0625	-13.7188	-15.4375	-17.4688	11.9688	12.5625	-27.0312	14.0312	-11.25	0.00536	-19.625	7.90625	-8.78125	-5.28125	-22.75	8.59375	5.875	-13.9375	-20.8438	-43.7812	23.1875	32.2188		0.00536
0.0054	-12.375	13.5938	2.78125	2.875	-26.1875	-30.7812	-41.2812	3.03125	-22.25	2.5	-11.6875	-47.3125	0.0054	-12.3438	3.96875	-16.2188	-12.5	-15.0938	41.4688	-25.6562	17.9062	-38.9375	4.90625	14.9062	-24.5312	-8.46875	2.625	0.4375	-22.9062	-10.9688	-1.8125	-0.15625	-34.2188	-27.4375	0.00538	-2.28125	1.03125	27.4375	-12	-23.5938	-7.125	15.2812	-22.9062	-1.4375	-6.53125	-30.75	-9.59375		0.00538
0.00542	-0.84375	-9.3125	19.1562	-3.15625	-22.4688	15.9688	8.96875	-22.5938	-15.3125	27.375	32.0625	-14.0938	0.00542	18.6562	-18.9062	25.0625	-29.8438	-0.625	-42.0625	-13.3438	40.8438	14.5938	4.53125	-10.8438	12.7812	-17.5	-20.7812	-32.7188	22.6562	-7.9375	-27.3438	-8.8125	-27.375	4.46875	0.0054	-8.59375	-29.8438	-24	6.3125	4.1875	-0.125	-9.4375	-20.6562	2.5625	8.53125	-11.375	-41.5625		0.0054
0.00544	37.8438	4.5	11.4062	-1.3125	9.21875	-1.25	-23.0312	-3.8125	0.3125	-36.0938	-16	-12.8125	0.00544	-1.46875	-4.90625	-30.5	20.5625	-1.90625	-5.40625	15.25	27.1875	9.78125	-15.4688	-32.5625	-20.375	14.25	-3.90625	-8.625	17.9062	-1.1875	34.4688	4.28125	3.34375	6.9375	0.00542	14.3438	15.5625	-28.0938	-20.75	6.75	15.9688	-13.2812	14.9062	-8.40625	-16.2188	22.9062	12.25		0.00542
0.00546	-9.53125	-13.3125	-3.40625	2.4375	-0.96875	-36.5	8.03125	19.0938	-47.375	-37.0625	-25.5312	-15.0625	0.00546	-2.28125	15.1875	-3.15625	13.0312	-18.0312	22.25	1.84375	5.21875	-6.84375	-23.0625	-13.8125	5.5	24.375	25.5938	19.5938	-39.5625	-3.53125	-21.3438	-1.875	5.71875	-25.5625	0.00544	-15.7812	30	20.9375	-15.3125	-25.1562	-22.8438	13.0938	18.375	-2	-39.2188	-30.8125	-1.625		0.00544
0.00548	-1.40625	12.3125	-14.6562	-25.8438	-26.8125	28.2188	0.5	-14.5625	-23.25	1.59375	59.0625	9.375	0.00548	-14.75	-10.5625	29.2812	-31.5625	10.4688	-10.75	3.5625	-8.59375	-5.84375	16.4688	8.59375	-12.4062	-16.7188	-4.40625	-19.8438	5.1875	-31.0312	-24.9062	11.2812	-4.84375	-11.0625	0.00546	26.6562	-32.625	-22.7812	-17.4688	31.9375	-37.875	-0.78125	-27.5625	6.46875	47.4375	-32.5312	-19.3438		0.00546
0.0055	8.625	18.625	16.875	-6.65625	1.53125	14.9375	7.125	-7.78125	19.5	0.6875	11.375	1.78125	0.0055	0.34375	4.6875	-5.3125	-0.0625	16.9062	-13	3.125	6.8125	-21	17.4062	-20.4688	-15.375	10.625	-24.9375	5	-11.375	-7.21875	18.4062	-1.3125	-1.1875	5.5625	0.00548	-10.25	-31.0938	-5.625	9.53125	8.0625	34.125	1.34375	23.9688	-9.40625	-8.375	10.5938	12.5		0.00548
0.00552	-49.9688	-0.875	27.0625	-23.1562	5.65625	-41.9062	-23.5	-5.5	-3.875	-5.875	6.84375	-9.5625	0.00552	-9.875	-10.875	-40.125	23.9062	-23.2188	5	9.625	-14.125	-38.5312	7.5	11.3125	13.7812	12.0938	18.5938	22.0938	-13.7812	23.4062	-13.7812	-3.84375	10.1875	14.3438	0.0055	-17.9062	34.6562	1.09375	18.1875	-18.8438	8.21875	-6.0625	8.71875	-9.84375	-18.9062	22.1875	-8.625		0.0055
0.00554	-17.875	8.8125	4.9375	7.15625	2.15625	15.5312	-1.1875	17.9062	-18.9062	-11.5312	10.4062	-11.0625	0.00554	10.125	0.96875	35.6875	-25.4062	7.84375	-16.5625	-10.3125	22.4062	11.3438	29.6562	13.7188	2.125	-10.7812	-1.9375	-0.96875	10.0625	4.4375	-11.7188	1.59375	2.875	-5.34375	0.00552	4.9375	-9.3125	17.9688	-15.1562	-15.375	-6.75	-32	-45.375	-5.71875	-8	19	-27.4062		0.00552
0.00556	13.9062	-15.1562	33.75	11.4375	-1.8125	0.875	23.5625	-40.125	-0.4375	11.6875	-14.125	26.9062	0.00556	-11.4062	-21.2812	7	3	-3.6875	-21.0938	7.9375	1.5	-15.8125	12.2188	-18.6875	-24.2188	-13.2188	1.875	-6.15625	11.4062	-15.125	4.46875	-20.8125	-8.75	0.96875	0.00554	-1.5	-2.4375	-24.8438	5.09375	-8.875	19.6562	14.4375	-11.8125	-5.65625	-1.5625	-4.78125	11.2188		0.00554
0.00558	-30.8125	-40.5625	-19.0938	-7.59375	-13.3438	-21.5625	-25.5625	14.3438	8.96875	15.9375	-8.9375	2.6875	0.00558	-6.53125	-20.1875	-38.6562	22.5938	-12.7188	40.6875	-9.53125	-26.625	-19.8438	16.0625	12.875	-14.0312	4.71875	11.3125	17.0938	-31.75	42.7188	13.8438	14.5625	1.3125	-7.75	0.00556	-50.9375	-5	1.46875	-6.90625	-8.1875	-9.84375	-10.625	-24.0312	14.1875	21.75	-1.9375	10.9375		0.00556
0.0056	3.65625	-25.5	5.65625	-0.40625	5.75	-3	-40.2188	2.53125	-6.1875	-2.9375	-7.59375	-11.125	0.0056	18.7188	13.6562	12.5625	-1.375	-1.96875	-18.0625	3.96875	-6.53125	10.4688	4	8.375	24.375	-12.1875	5.71875	-22.9062	0.25	-2.65625	-17.875	19.5	-11.2812	-21.1875	0.00558	-11.6562	-25	22.4375	-18.1875	20.75	-33.9062	-11.5938	14.75	18.3125	11.9062	14.7188	-13.1562		0.00558
0.00562	23.4688	27.9375	-11.125	1.59375	1.9375	19.2188	7.4375	-16.625	23.75	-27.7188	-12.9375	-6.84375	0.00562	-25.6562	-7.65625	-3.3125	2.3125	7.71875	-29.1875	-1.34375	9.46875	-5.15625	9.96875	-15	-1.4375	-38.625	-31.6875	-14.25	17.9062	-13.375	-1	-5.21875	-28.1562	-1.53125	0.0056	7.03125	-7	-26.7188	18.2812	-1.5	14.5312	0.1875	3.21875	-46.7812	18.4688	-26.7812	-14.0312		0.0056
0.00564	10.1562	-35.7188	-11.4062	1.28125	11.4688	-18.4688	-3.8125	43.3125	27.6875	-2.6875	-39.8438	2.15625	0.00564	-11.875	7.71875	-33	12.7812	0.75	35.375	-34.1875	-25.2188	-36.25	-11.875	-18.9375	-13.9688	22.5625	-2.71875	19.8125	-35.125	-8.3125	-22.2812	-9.40625	8.3125	-20.875	0.00562	-3.09375	47.4688	7.96875	24.9375	-38.875	6.375	23	6.3125	-46.4375	3.4375	16.3125	-18		0.00562
0.00566	26.5625	-11.5	4.71875	0.78125	-11.4375	8.9375	17.6875	11.875	-33.0312	13.7188	4.6875	3.96875	0.00566	-5.40625	-22.5625	25.1562	-2.5	-6.5	10.1875	-17.9062	-30.7188	22.625	-29.8125	-10.125	-2.53125	-21.2188	-3.59375	-32.5938	-14.7812	-13.3438	-4.4375	27.1562	-25.8438	-21.9688	0.00564	-11.4375	-9.4375	29.0938	-18.4062	-16.1875	-31.3125	-11.4062	-29.625	14.1562	0.375	5.59375	21.5625		0.00564
0.00568	59.0312	41.875	-3.4375	38.9688	-3.34375	28.0938	-4.34375	-21.4062	17.6562	-17.25	-2.625	-2.53125	0.00568	-23.7812	3.65625	-15.9688	-18.4375	15.5312	-34.5	-14.7188	25.1562	18.9375	4.21875	-24.2812	-21.8125	-41.2188	-34.6875	-6.25	10.9688	-16.6562	-31.1562	2.9375	-0.53125	-4.65625	0.00566	24.6875	-7.71875	-12.7188	-7.0625	20	-28.2812	-23.0625	-16	8.09375	9.25	-31.5625	12.6875		0.00566
0.0057	-8.65625	-13.25	-15.5625	-31.1562	15.0312	7.5625	7.9375	-7.09375	17.9688	24	-29.3438	-17.625	0.0057	31.0625	16.1562	-22.3438	0.875	-26.3125	-3.375	-15.0312	-33.375	-32.0938	-4.8125	-7.25	-12.25	34.4688	8.84375	14.75	-50.6562	8.0625	-29.4375	-42.3438	9.21875	2.40625	0.00568	-4.34375	-1.125	-20	0.875	-4.53125	8.15625	3.96875	19.6562	-12.1875	-19.375	8.03125	-43.0312		0.00568
0.00572	-11.5625	-26.625	-1.46875	-33.8125	20.5	-19.0312	12.9062	23.5625	-18.5625	-7.78125	8.84375	1.9375	0.00572	-8.625	2.78125	0.96875	7.0625	-18.4375	8.46875	17.6562	-3.53125	13.0625	-17.2188	2.875	5.40625	-0.625	22.9688	-21.25	23.0625	19.7812	-12.875	-16	-12.625	24	0.0057	-16.9375	-24.0938	28.125	1.71875	7	-5.625	2.84375	4.28125	-4.84375	1.65625	17.625	-1.9375		0.0057
0.00574	38.0312	39.5938	-16.875	22.1875	33.7812	10.6875	-12.1562	-35.4062	-25.5938	-46.0938	-4.46875	5.84375	0.00574	-27.5312	-18.2188	35.1562	-7.5625	2.0625	-50.5312	-14.4062	32.8125	16.4062	-8.75	-46.5625	2.125	-12.2188	-3.5625	-36.7812	17.7188	-26.8438	-21.3125	-2.6875	-8.0625	-22.7188	0.00572	-0.5	-21.375	-29.9062	12.625	16.9062	7.15625	21.0312	-1.09375	20.625	-15.8125	5.28125	8.96875		0.00572
0.00576	3.84375	-6.78125	-17.0312	0.375	-6.09375	10.7812	-18	-10.4688	24.6562	18.75	-33.8438	2.90625	0.00576	-21.3125	-17.5625	-20.875	-11.5312	-23.2812	3.9375	-2.4375	-45.4375	-42.0938	18.3438	-5.0625	-13.5938	8.3125	-15.5625	38.0625	-31.25	-11.1562	12.125	-27.125	-31.9688	2.21875	0.00574	23.5	41.4062	-38.3438	-2.21875	-9.125	6.84375	-7.34375	-5.03125	5.09375	16.9688	-15	18.25		0.00574
0.00578	-12.8438	-38.875	36.75	-34.4688	-18.5625	4.3125	6.21875	37.7188	-10.5625	9.25	27	-30.4062	0.00578	34.9688	2.78125	20.25	-15.0312	-30.5625	-2	-13	-30.7812	17.1562	-20.0625	5.9375	15.3438	-3.09375	4.4375	16.5312	-0.46875	-8.21875	4.375	-28.0312	0.59375	3.90625	0.00576	-12.4062	9.5625	-2.875	-29.2188	-25.125	-30.9375	-11.4062	14.2812	-6.03125	20.7188	-18.25	-10.7812		0.00576
0.0058	-5.53125	23.5625	-0.3125	-17.1562	10.0938	8.15625	13.5625	-19.625	-51.5625	-23.6562	14.1875	-13.25	0.0058	-16.7188	-19.2188	3.1875	-25.25	7.59375	-9.4375	5.3125	39.25	29.3125	14.9688	-12.0938	19.375	-12.9688	-19.125	-10.8438	32.6875	-17.75	-22.1875	-8.09375	-9.53125	9.4375	0.00578	-2.59375	1.78125	-5.34375	3.46875	16.9062	23.0938	7.96875	4.875	-11.2188	-18.2188	18.2188	-22.9375		0.00578
0.00582	-23.125	19.875	-31.3125	2.0625	-28.875	8.46875	15.75	15.8125	14.6875	-32.4688	4.8125	-3.84375	0.00582	-6.125	10.4688	-40.75	-17	39.2188	-18.125	-8.25	-17.5312	-33	18.2812	-8.625	-15.125	31.5938	-20.0938	8.15625	-25.4688	-33.9375	10.6562	2.625	34.875	-25.5625	0.0058	-14.7812	-17.875	15.2812	17.4062	7.40625	24.4062	8.96875	-11.1875	-20	-45.2812	8.625	-11.875		0.0058
0.00584	13.8438	-48.4375	28.3438	16.0938	-31.9062	0.375	-22.9688	14.625	0.125	0.4375	13.25	-6.40625	0.00584	32.6562	-20.875	-4.8125	-0.71875	-24.8438	6.875	-0.125	-53.4688	-36.3438	-23.7188	10.2188	-7.5	-13.9375	4.40625	-14.4375	-31.625	16.875	0	-11	-14.5625	-7.84375	0.00582	13.1875	-12.8125	-14.125	-38.8125	-7.84375	-20.1875	-17.625	-6.125	-8.90625	34.9062	15.875	-5.78125		0.00582
0.00586	2.46875	-20.5312	11.8125	4.8125	-36.125	-14.6875	10.9062	3.0625	-8.84375	-7	24.0938	-0.1875	0.00586	-23.7812	-14.25	25.5625	-5.78125	-18.4375	9.5	11.2188	23.375	36.0938	-6.0625	-8.34375	-1.28125	-28.25	-7.78125	-11.1875	40.125	15.2812	2.21875	20.1562	-9.8125	28.9062	0.00584	12.1562	-16.9062	-17	22.8438	5.8125	15.7812	9.96875	-22.625	2.15625	22.4375	-25.9375	11.1875		0.00584
0.00588	-5.34375	1.625	-12.4688	-15.4688	-9.46875	-35.9688	-22.8125	-20.5625	-2.3125	-1.46875	-48.6875	-13.6875	0.00588	-12.875	10.2188	-51.1562	-10.375	30.2812	33.0938	-7.65625	-19.4062	0.40625	-22.5312	-12.8438	1.375	7.15625	-30.3125	12.2188	-13.9688	-31.25	7.59375	-10.0938	41.9688	-26	0.00586	-12.75	-19.9688	-1.15625	30.75	-12.7188	1.71875	16.0625	-8.375	14.125	-56.1875	-19.2812	18.9062		0.00586
0.0059	13.3438	-21.125	-12.9688	-1.96875	-5.6875	-3.03125	-4.65625	-24.9375	14.25	25.4688	0.96875	18.0625	0.0059	32.2188	-4.09375	15.5312	-0.84375	1.6875	50.2188	5.5625	-46.0312	-1.09375	-11.5938	24.0312	-8.375	1.65625	-3.28125	14.2812	-32.75	-1.96875	-1.5625	-20.0938	4.34375	-19.1875	0.00588	-12.1875	-6.40625	5.46875	-20.4375	-7.53125	-20.0625	-39.125	-0.90625	30.875	21.1562	-14.4688	-32.4688		0.00588
0.00592	4.96875	-2.34375	26.8125	15.0938	-18.9062	4.65625	28.5312	37.1875	14.625	-16.2188	5.78125	2.40625	0.00592	-2.46875	0.78125	23.75	-7.03125	-6.75	-0.5	-9.15625	22.2188	16.2812	-29.125	-3.96875	6.71875	-8.5	-8.625	-60.4688	26.0625	-6.09375	10.4688	17.8125	-23.5312	2.78125	0.0059	10.5625	-3.4375	25.4062	7	26.8125	-15.25	-20.2188	12	-26.5	13.0625	17.875	-3.84375		0.0059
0.00594	-4.59375	33.7188	26.2188	4.28125	7.21875	-28.0312	-3.9375	-21.5312	-8.8125	-38.5938	-31.5312	-15.8125	0.00594	-28.4375	0.6875	-56.125	4.3125	11.9375	-12.4062	3.96875	-0.59375	-17.3125	-0.96875	-11.75	-39.7812	12	-2.1875	20.4688	2.21875	-36.0938	12.9688	-11.2812	-11.4375	-12.0625	0.00592	-32.6562	14.0938	-11.0625	1.40625	-17.4688	14.5312	24	25.1875	-11.5625	-16.4375	-11.7812	23.6562		0.00592
0.00596	-13.9688	-28.75	11.5	2.78125	21.4375	-15.5625	-24.9688	-32.5938	-42	-20.1562	24.625	-18.8438	0.00596	33.0625	5.90625	11.4375	8.09375	-22.9062	15.375	11.6562	-27.4062	-18.0625	7.1875	-11.7188	-2.625	12.2812	20.0625	3.625	-44.5	-14.875	-21.5312	-0.65625	-24.3438	14.9062	0.00594	6.03125	-16	1.84375	-29.2188	6.40625	-7.5625	-3.875	-15.8125	-0.71875	-23.8125	-36.5	-3.375		0.00594
0.00598	6.40625	6.40625	46.0625	-5.90625	-1.84375	47.25	8.625	-9.90625	-3	-16.4688	-6.28125	9.75	0.00598	-14.5	0.59375	48.25	-2.15625	-19.1875	7.84375	-17.5625	16	20.375	-31.4062	-1.0625	1.34375	-51.4375	-5.34375	-34.5	-13.125	46.75	-24.3125	10.6562	-33.0625	-18.2188	0.00596	6.9375	-10.25	9.6875	-9.6875	10.625	-8.34375	-3.3125	-17.3125	6.46875	-5.25	-16.625	-33.9062		0.00596
0.006	-8.25	23.8125	29.3125	-6.4375	5.25	-4	-37.8125	-2.71875	33.5	-2.1875	-6.71875	17.6875	0.006	-37.3125	1.78125	-46.8438	-4.8125	22.7188	-14.3438	-5.125	26.4688	-24.625	-6.46875	14.4062	-32.25	11.0938	-8.0625	29.0625	10.3125	10.8125	17.3125	-23.125	-14.9062	-2.6875	0.00598	-6.9375	16.75	-20.2812	7.21875	-17.0312	9.34375	8.65625	1.09375	-5.625	1.75	15.4062	9.40625		0.00598
0.00602	-17.25	-22.7812	2.90625	-10.7812	-10.7188	-5.53125	-20	7.90625	-12.2188	11.3438	19.0938	-13.1875	0.00602	15.125	-2.71875	-13.75	-9.21875	-24.9062	-5.03125	-20.6562	-26.875	-29.7812	18	-13.1875	-0.375	21.6562	29.7188	-0.46875	-25.75	-26.0312	7	-18.7812	39.3125	21.9062	0.006	-38.1562	27.75	-23.7188	-60.9688	3.96875	-1.40625	5.34375	-14.7812	17.2812	-21.0625	-24.4688	6.15625		0.006
0.00604	22.5	8.46875	0.5	-4.59375	-27.2812	42.4375	13.1562	4.65625	6.78125	24.9688	15.2188	-2.875	0.00604	-23.6562	28.3125	39.4062	-5.09375	8.9375	3.625	-1.46875	20.5625	27.375	-13.5625	-10.75	6.3125	-26.7812	-2.3125	-1.5	-2.15625	13.1875	-30.8125	0.09375	-9.25	14.875	0.00602	10.4375	-18.25	-2.6875	-5.8125	-2.5	-25.0625	-22.9375	-15.5938	-4.28125	19.75	0.21875	29.0312		0.00602
0.00606	-17	-0.78125	2.59375	20.4688	-7.03125	4.59375	15.3438	13.4375	19.1562	-8.40625	-26.9062	-7.84375	0.00606	-35.5312	36.0312	-40.2812	22	-6.25	-9.40625	15.5938	-19.8125	-20.9375	-7.875	-11.7188	-0.75	6.71875	-19.375	11.7812	19.5938	-0.5	-24	28.9062	-11.9375	40.8125	0.00604	-5.4375	-30.25	-25.6562	14.8438	-43.125	-0.21875	26.2188	19.5312	-14.7812	3.9375	25.875	-20.9375		0.00604
0.00608	-31.1562	-3.78125	-7.09375	-12.0938	17.7188	-7.21875	-31.4688	20.1875	-25.6875	0.9375	22.0625	11.4688	0.00608	15.625	-11.4062	-21.9062	-18.8438	10.6875	-11.0312	4.34375	-24.4375	-43.875	3.03125	20.2812	-5.9375	-9	11.6875	10.875	-12.375	-21.625	6.90625	0.96875	35.8438	6.75	0.00606	-17.875	-4	-5.40625	9.78125	-13	-21.625	16.2188	-8.96875	6.96875	-11.875	-6.1875	-29.2812		0.00606
0.0061	20.5938	6.8125	-27.875	24.4375	-6.875	0.84375	42.875	5.65625	-21.7812	11.9062	5.5	-12.25	0.0061	-15.1875	-39.2188	51.0312	5.8125	-32.0312	9.40625	-6.9375	10.625	23.5625	-13	10.25	-19.375	-27.25	10.5312	-30.0625	6.34375	45.6562	-24.8125	35.7188	-9.1875	4.375	0.00608	12.5625	6.15625	24.7188	0.125	33.7188	3.03125	-24.5938	-29.5	7.75	4.84375	15.6562	-0.9375		0.00608
0.00612	5.6875	6.09375	-16	-8.34375	22.3438	-0.625	5.375	-46.5	22.0625	-18.25	-22.5312	-3.25	0.00612	1.125	10.3125	-24.5625	20.1875	9.40625	-8.75	26.125	10.625	21.8438	-4.5	-41.4688	-4.53125	-10.625	-39.7188	-16.75	29.4062	25.0938	-20.1875	10.8438	-16.6562	-7.5	0.0061	-28.6875	11.5	21.4062	-16.0625	-21.2812	29.5	-9.65625	10.8125	-26.4375	-24.5938	22.5938	-14.125		0.0061
0.00614	-28.2188	-9.84375	40.0938	-40.1875	-16.4062	-30.5312	3.125	8.5625	7.15625	20.375	11.25	22.4688	0.00614	-12.375	-17.9375	-26.25	3.71875	15.4688	-10.8125	12.9688	-38.125	0.03125	3.5625	10.1875	21.5625	16.625	9.78125	21.625	26.4062	-14.9062	20.3438	-40.875	11.7812	-12.625	0.00612	-12.3125	-11.2812	-2.53125	-7.375	-25.0938	-5	20.75	-12.6875	-5.625	26.6562	16.5625	23.8438		0.00612
0.00616	11.625	-8.28125	-19.3438	28.625	-12.5625	-0.375	15.0938	-4.0625	-2.15625	-8.90625	0.5625	1.9375	0.00616	-13.5625	-20.6875	41.75	-20.5938	-22.7188	-30.25	-41.75	-6.96875	34.6562	-27.4062	2.90625	-9.8125	-3.0625	17.125	-14.125	-8.1875	17.7188	-16	-20	-0.90625	6.625	0.00614	31.625	-8.8125	33.25	-5.0625	37	-3.03125	-19.5312	-17.8438	-29.25	-14.5312	16.2188	6.46875		0.00614
0.00618	22.2812	-12.375	-10.5625	15	19.5938	26.0312	-20.2812	-34	29.8125	-11.7188	0.3125	-23	0.00618	-13.1875	3.96875	-20.125	-1.96875	-8.1875	-35.0312	17.4688	11.9062	52.4375	-10.7812	-25.2188	-23.625	10.5938	-46.0312	-25.4062	9.375	36.8438	-0.84375	7.6875	-35.6562	-11.0625	0.00616	5.9375	2.21875	-9.125	-2.75	-30	-19.875	-4.5625	-16.6562	-5.625	-19.9688	-5.84375	-0.1875		0.00616
0.0062	-7.90625	-4.375	29.25	-32.4375	3.28125	-26.5625	-25.3438	34.0625	44.5938	-9.375	19.1562	-14.7812	0.0062	14.4375	-4.59375	-14.7812	-9.59375	5.78125	18.9062	5.84375	-39.8438	-32.9062	-4.8125	-1.9375	24.5312	42.6562	17.8125	15.5625	33.0625	-28.375	12.5938	-3.59375	-9.3125	-7.53125	0.00618	-42	15.7188	-13.8438	-2.125	-4.21875	-21.9375	11.5938	29.4062	4.3125	31.0625	-12.1562	-12		0.00618
0.00622	-11.9375	25.8125	-10	-5.8125	-14.0938	-17.4062	-6.6875	34.5938	-7	0.25	23	8.25	0.00622	6.8125	-24.125	16.0938	8.15625	-40.4062	-7.8125	-49.2812	-17.3125	15.0938	0.34375	0.78125	-2.71875	-5.25	25.625	-19.4062	-20.7188	-19.7812	-7.25	-12.2188	-13.8438	3.34375	0.0062	10.9375	-2.875	1.625	11	18.2812	-10.75	-11.9062	18.9688	0.40625	-4.5625	-14.1875	-9.59375		0.0062
0.00624	46.1875	14.5938	-3.09375	-2.71875	-16.9062	11.5312	28.0938	-7.03125	-1.59375	-40.0312	-12.5312	2.125	0.00624	-26.4688	4.40625	-2.53125	-12.0625	-10.5938	-26.7812	-3.28125	33.5625	53.75	-10.0625	-29.8438	7.625	-24.75	-51.0625	-36.5	12.4688	41.125	-12.0625	-18.625	-34.375	-21.9062	0.00622	11.5312	-17.8438	-4.09375	-9.09375	11.4688	4.15625	25.5625	-6.6875	28.125	-32.4688	2.34375	2.84375		0.00622
0.00626	-58.8125	-41.2188	-6.75	4.15625	8.625	-8.40625	-20.2188	-14.5938	44.4375	3.90625	5.15625	-22.1562	0.00626	31.125	10.1562	-46.9688	-46.375	2.4375	-16.4375	-12.7812	-6.21875	-35.6562	1.5625	-10.75	19	29.7188	-24.5	28.0938	2.125	-32.9062	4.15625	-42.9688	-2.9375	10.375	0.00624	-9.59375	-4.09375	-34.2188	-18.625	-3.96875	-9	-0.21875	11.25	-20.25	-15.5625	5.53125	-17.375		0.00624
0.00628	-35.5312	15.7188	7.25	-2.3125	-4.46875	-4.4375	-2.5	9.34375	-21.9062	5.09375	32.5	-36.375	0.00628	16.7812	-33.25	15.3438	8.3125	-28.9688	-12.4062	-7.6875	-28.25	7	18.625	5.625	-6.28125	43.875	38.25	7.40625	-17.0312	-24.1562	-9.21875	2.71875	20.9375	1.84375	0.00626	23.1875	7.84375	11.4062	28.5	-0.125	-0.46875	4.71875	-3.90625	-3.875	8.65625	3.46875	-9.9375		0.00626
0.0063	29.5938	21.6562	-34.3438	5.25	24.9062	29.1875	20.6875	-28.125	-46.9688	-32.9375	-13.7188	-0.0625	0.0063	-42.4062	-0.34375	14.0312	14.0625	-13	-8.5	24.5625	25.0938	35.75	-20.875	-28.2188	1.65625	-34.5	-12.1875	-15.375	-10.6875	17.9062	-9.6875	16	-9	14.2188	0.00628	-7.21875	-6.125	-9	16.3125	4.46875	19.1562	-1.125	5.53125	-4.90625	-5.96875	-11.1562	1.90625		0.00628
0.00632	-18.1875	-15.4062	14.9688	-5.28125	27.4062	-8.59375	-7.53125	-3.34375	7.8125	18.9375	-6.34375	11.2188	0.00632	22.9062	1.125	-39.7812	-27.5312	19.7812	6.625	13.6562	0.21875	-12.3438	10.5625	-18.5625	-0.9375	16	-20.2812	13.9062	16.8125	-29.0312	0.78125	4.90625	5.28125	9.4375	0.0063	-36.7812	11.4062	-49.9688	-14.6875	-6.34375	-8.15625	-27.2188	-22.6875	1.375	22.0625	-16.8438	4.15625		0.0063
0.00634	-37.2812	-31.9688	30.4375	-6	-5.78125	-10.875	-16	0.71875	-11.875	50.0625	16.9375	-4.25	0.00634	29.1562	-44.8438	27.9375	-13.5938	20.5	9.1875	-25.7812	-19.2188	-14.2188	3.75	40.1562	3.46875	40.7188	28.5	2.375	-1.84375	-28.625	22.4688	29.0938	11.7812	-25.4688	0.00632	16.1562	-34	21.8438	-8.5	2.34375	6.28125	-0.21875	-33.0938	17.5312	14.7188	-15.5312	-11.75		0.00632
0.00636	16.4688	19.4062	-11.25	-16.8125	14.4375	6.8125	4.6875	-33.9688	-31.8125	-28.7812	3.0625	14.0312	0.00636	-3.75	-25.7812	6.9375	-2.5	-13.25	-19.5625	12.2188	8.34375	12.1562	-20.8438	-20	-0.71875	-33.375	-15.7812	-36.9688	-7.90625	-9.78125	-15.2812	30.0625	-0.5	-11.6875	0.00634	4	-26.8125	27.1562	-12.0938	3.96875	20.8125	7.90625	24.6562	-13.5	-14.2812	16.6875	3.5		0.00634
0.00638	12.125	-15.4062	-19.8125	-18.125	7.125	-13.7812	1.90625	-36.8438	22.4688	15	5.75	-15.125	0.00638	-14.125	13.7812	-12.4688	-16.5938	-10.6875	-6.5625	15.8125	-0.3125	-22.3125	6.53125	7.71875	-12.2188	-1.3125	-22.9062	1.78125	15.9375	11.0938	1.78125	-1.28125	-31.4062	-6.75	0.00636	-28.7812	7.71875	-18.2812	-39.0625	-1	-32.5	-21.4688	2.625	8.3125	-28.1875	-0.46875	16.2812		0.00636
0.0064	-26.8438	-28.3125	1.71875	-21.4375	-8.15625	5.875	-0.40625	43.5312	12.9062	17.9062	15.4375	1.875	0.0064	5.34375	5.8125	24.875	-20.3438	7.65625	19.7812	-18.4375	-24.2812	-24.4062	14.4688	10.9688	24.625	2.46875	26.7812	22.125	-26.7188	-24.8438	21.8125	0.75	-4.34375	1.15625	0.00638	8.40625	12.4688	-10	-3.03125	-6.625	9.25	-2.78125	-24.8438	8.65625	15.1562	-8.96875	-14.5		0.00638
0.00642	15.9688	10.1562	16.875	18.125	-3.15625	25.0938	15.1875	-12.6562	-20.7188	-61.9062	3.3125	-12.7188	0.00642	-26.8438	-2.625	40.4375	14.3438	-22.6875	-11	10.2188	-4.40625	12.4375	3.84375	2.375	-23.2188	-33.875	-22.2812	-16.9688	-16.4062	-14.2812	-9.78125	8.21875	33.25	-12.7812	0.0064	33.4062	-24.8438	27.4062	37.7188	7.25	-3.78125	22.8125	-10.5	-33.4062	-18.6562	16.75	-1.6875		0.0064
0.00644	14.2812	9.15625	-26.7812	14	-8	-26.25	-14.4062	-5.15625	6.84375	1.4375	-0.96875	-5.65625	0.00644	9.375	4.59375	-3.46875	35.125	-9.59375	-7.75	14.5938	-19.75	-33.5	-6.6875	-23.5938	-33.8125	7.71875	-21.9688	-44.4062	6.75	14.8125	8.46875	-7.625	-15	-31.3438	0.00642	-14.125	9.0625	-5.1875	-3.90625	2.71875	-8.21875	-39.1875	-5	4.125	-34.9062	-15.75	14.875		0.00642
0.00646	-12.4688	-15.2812	-4.28125	15.0625	-7.03125	-21.25	-11.5	13.2188	13.25	22.375	-10.5625	-0.625	0.00646	16.9375	13.4688	-37.0625	7.625	2.46875	-1.375	-7.96875	15.2188	-10.25	-13.0625	9.625	9.78125	14.4375	8.5625	-35.625	-35.125	-23.4062	-7.15625	-1.78125	-8.40625	-35.5	0.00644	-16.9062	10.1875	-20.9062	-20.6562	3.375	-37.875	-11.0938	12.125	10.3438	-12	-34.0938	-11.3125		0.00644
0.00648	4.15625	10.9688	32.2812	15.5312	-19.6875	16.7188	-12.9688	-0.125	-19.4062	-20.7812	-3	15.7188	0.00648	-32.25	8.34375	27.75	6.75	20.2188	9.125	-29.7188	6.21875	-3.5625	-20	16.25	2.59375	-45.5938	-0.6875	-23.2812	15.9062	10.1875	-9.78125	19.2188	7.28125	-10.6875	0.00646	4.28125	-19.1562	-18.1562	10.2812	10.1875	17.1875	11.7188	7.5625	-15.9688	21.6875	0.625	-3.53125		0.00646
0.0065	-2.84375	19.375	-12.3125	-16.7812	16.4688	7.5	-2.5	-29.4688	-6.90625	-20.875	-2.375	-10.8125	0.0065	-11.0938	23.1875	-2.59375	10.3438	17.0625	-8.25	-5.5	-13.8438	-44.7188	-23.5312	-18.0625	-27.8438	-25.2812	-37.0625	0.59375	-23.8438	23.6875	-8.875	25.3438	-30.7188	-18.5	0.00648	-2.28125	12.125	-16	-22.625	-12.0312	-1.25	33.2812	8.03125	-26.25	-45.9688	-23.8438	-19.375		0.00648
0.00652	7.21875	-18.4688	-12.9688	-9.25	21.0625	6.28125	3.46875	25	11.5	34.5	10.8125	-28.4375	0.00652	25.9688	8.375	0.5625	41.0938	-30.0312	-0.25	14.0312	-7.65625	-18.4375	-18.7812	-4.96875	-15.5938	-7	-0.375	29.4375	-13.8125	-17.3125	8.34375	-26.3125	-17.7812	-7.03125	0.0065	-12.2812	8.8125	40.7812	-38.9062	-18.375	-38.6562	-23.7812	-23.5625	43.2812	2.8125	-15.2812	14.625		0.0065
0.00654	16.375	-11.3125	-0.875	12.4688	-27.4688	15.9688	33.9062	-22.3438	3.90625	-4.78125	-8.84375	-2.5	0.00654	-41.5	-11.0312	26.8438	0.59375	19.0625	6.375	-22.1875	28.0625	22.0312	-5.28125	7.65625	-2.34375	0.71875	67.9375	34.4375	-7.3125	-18.8125	-31.625	4.125	21.7812	6.5	0.00652	23.5312	-31.0625	1.0625	25.1875	20.7188	19.6562	-16	6.5	-26.0312	12.625	13.0312	-6.375		0.00652
0.00656	16.9688	33.2188	-3.03125	-26.1562	10.4688	-9.5	-2.8125	-16.2188	14.4688	-18.7812	-11.5312	-11.7812	0.00656	-13.3438	-27.0938	-4.875	-24.2188	-27.4688	-33.25	12.5938	-7.96875	-19.5625	23.5938	-19.75	-0.3125	-8.84375	1.28125	-13.8125	-2.125	12.5	-31.8125	2.96875	9.5	7.34375	0.00654	-15.8438	3.1875	-10.4688	8.5625	-16.6875	27.9062	12.0625	-6.28125	-2.9375	-14.9062	1.59375	-33.2812		0.00654
0.00658	-12.625	-19.7812	-10.5625	-7.46875	17.7188	-5.03125	-11.4375	18.25	-9.25	38.8125	-2.25	-25.7812	0.00658	3.09375	-12.1875	-39.125	14.7188	-14.375	-5.8125	25.6562	-31.5312	-44.4688	-9.1875	3.125	18.9062	-0.8125	22.7812	6.21875	1.59375	-33.25	-1.0625	-19.5938	-18.8125	3.9375	0.00656	-52.3125	-1.8125	-15.9062	-51.5	20.4688	-14.125	3.71875	-3.90625	23.375	11.4375	-5.5625	-7.34375		0.00656
0.0066	-16.4375	-7.125	-10.9062	13.2188	4.28125	44	22.4375	8.9375	-23.25	13.2188	7.40625	-7.78125	0.0066	-12.2188	2.46875	30.0938	-11.0312	-0.75	-9.9375	26.5625	24.7188	8.78125	-13.375	19.6562	14	18.5938	42.2812	10.8125	6.15625	-14.0938	-16.875	-15.0312	10.7188	-21.7188	0.00658	17.5	13.75	-10.2812	-11.125	-17.9688	-30.5	3.5	0.25	1.78125	-5.5625	44.875	-1.25		0.00658
0.00662	-14.125	3.90625	20.9062	6.4375	0.3125	3.15625	-22.9688	-19	11.4375	-29.8438	-19.5312	14.4688	0.00662	-34.8125	-5.4375	13.5625	-19.625	-0.96875	-5.15625	3.0625	9.59375	12.9375	18.8438	-33.1875	-9.90625	-17.5625	5.25	-18.625	24.0312	0.125	-11.9688	-10.6875	7.3125	-15.0312	0.0066	-23.3438	6.71875	3.21875	25.9688	-6.40625	33.9688	-15.125	-14.7188	-17.125	-15.7188	-6.90625	5.15625		0.0066
0.00664	-14.0312	-19.3438	6.96875	-47.4688	-12.3438	-7.84375	-4.40625	25.3125	-33.5312	-7.375	-28.125	-1.3125	0.00664	-12.25	-0.71875	-26.7812	-10.9375	0.96875	-17.5312	-9.9375	-28.9062	-27.4062	-16.2812	-27.9688	-17.75	-17.1875	-2.71875	-0.09375	9.3125	4.75	5.03125	-9.125	-23.6562	-38.9688	0.00662	-14.125	-12.9688	9.21875	1.90625	8.375	-16.3125	-12.9375	0.28125	-17.6562	32.875	-30.2188	-14.9688		0.00662
0.00666	35.7812	-25.4062	-22.25	15.3438	-26.3438	5.8125	38.9375	12.3438	1.5625	24.75	-3.78125	13.0625	0.00666	25.5312	-7.96875	22.3438	22.4062	-2.59375	-12.5	-13.3125	-2.625	16.1562	-22.7188	2.71875	3.96875	7.96875	11.7812	-18.9688	-40.125	-6.28125	-6.34375	-9.21875	15.8438	2.3125	0.00664	29.5312	30.4375	11.8438	-4.375	-15.875	-15.6562	9.75	31.9688	5.09375	14	14.5938	3.28125		0.00664
0.00668	-1.21875	8.15625	-0.1875	27.6562	-12.5625	-21.4688	0.125	-25	30.7188	-20.4062	0.15625	11	0.00668	0.59375	14.75	-34.3125	-17.25	18	13.0625	24.9375	1.96875	20.2188	4.78125	-15.0625	-9.25	-6.59375	-20.0938	5.09375	-2.375	-2.1875	-15.125	33.3438	12.0625	21.4688	0.00666	-7.25	-9.34375	-13.7812	1.71875	-22.3438	15.0312	36.0938	13.4062	-30.8438	-18.2188	-1.09375	3.84375		0.00666
0.0067	-28.5625	-11.0312	-11.8438	-20.875	-27.4062	-17.5312	-19.125	42.6875	-12.75	-19.5312	-3.53125	57.2812	0.0067	9.75	-13.1875	-17.2188	-23.25	-16.75	-19.3125	-0.84375	-41.9062	-20.1875	-0.90625	-20.2188	-15.7812	-1.125	-55.3438	-13.9688	4.46875	-14.4062	1.90625	13.8125	-49.7188	-0.71875	0.00668	2.96875	7.1875	3.34375	20.5938	-3	-14.7812	3.71875	-20.6875	24.5	2.3125	-14.25	-12.1875		0.00668
0.00672	-1.53125	-30.7188	-11.6562	-15.5625	-0.84375	14.6562	35.9375	-5.625	-15.4375	8.84375	-13.5	7.40625	0.00672	-13.9062	-28.625	15.9688	11.4062	-16.5625	5.8125	-21.5312	-13.9062	23.125	2.46875	48.7188	-7.40625	-19.0312	25.0625	-24.9375	-20.7812	-3.78125	13.0312	-31.5625	-4.96875	-25.4375	0.0067	16.1562	-16.9375	-3.71875	16.4375	-21.125	-1.21875	-3.5625	9.03125	9.90625	-0.34375	-4.375	9.84375		0.0067
0.00674	1.71875	17.375	4.5	24.6562	-10.6875	-9.75	-1.4375	-23.0625	36.5312	-17.2812	3.46875	-35.6875	0.00674	-9.46875	46.6562	-53.5938	5.21875	17.0625	-3.71875	7	33.25	1.53125	-9.03125	-13.1875	1.25	-33.0938	4.71875	-7.96875	-31.7812	4.84375	-20.3438	-10.2188	-0.9375	7	0.00672	-20.875	0.21875	-7.875	-11.25	-2.5	-8.8125	9.65625	21.3125	-39.8125	-19.4688	5.78125	-12.9062		0.00672
0.00676	-11.7188	-1.25	27.4688	5.9375	-8.84375	-30.2188	-39.7812	-17.6875	0.625	-6.8125	-12.8125	-34.125	0.00676	1.96875	-9.5625	-11.0938	-4.96875	-23.8125	-9.9375	-1.40625	-14.375	-41.4375	11.9062	-45.8125	-12.3125	-19.7188	-39.25	-1.71875	-0.5	-13.4062	21.3438	0	3.21875	-2.90625	0.00674	9.96875	-26.7812	-12	-32.7188	28.5	-2.8125	-4	-15.2812	-4.5	-8.65625	-14.8438	-10.375		0.00674
0.00678	-19.0312	-23.1875	-14.5938	-23.375	-24.3438	11.6875	-4.53125	29.0625	-40.125	5.34375	7.9375	9.3125	0.00678	29.3438	-20.2812	44.5	-14.625	-13.5625	-14.3438	-20.1875	-4.96875	35.4062	4.46875	22.9375	5.75	-8.34375	-3.875	5.09375	-17.4688	-21.4688	26.8125	-35.8125	-29.2812	-19.9375	0.00676	9.3125	7.1875	-11.2188	-0.59375	4.71875	1.65625	3.8125	17.6562	-5.40625	13.9062	9.96875	-22.2188		0.00676
0.0068	22.9062	22.8125	18.2188	-0.0625	-8	22.75	0.90625	19.6562	10.5	-41.6562	10.0625	-34.1875	0.0068	23.5625	23.25	-0.25	0.9375	17	-17.1562	10.3438	9.125	22.0938	-17.9062	10.9375	22.8125	7.40625	-2.4375	-22.1562	-0.71875	-21.6562	-42.0938	-31.5312	-3.25	-5.65625	0.00678	-6.6875	12.9688	11.8438	1.875	1.25	-18.3438	-12.2188	5.4375	-0.3125	-9.5	-25.25	26.375		0.00678
0.00682	-19.5312	-14.6562	25.3438	0.875	0.46875	-15.125	6.25	6.96875	8.15625	4.1875	2.875	-20.4688	0.00682	17.5312	-6.84375	-23.875	-36	31.4062	-3.34375	3.34375	-3.0625	-51.75	4.875	-9.5625	-32.7812	16.625	-21.9375	11.0625	-6.21875	1.53125	-4.71875	24.0625	5.96875	20.1562	0.0068	-3.8125	-36.5938	16.125	13.4375	-7.3125	-10.3125	-10.5312	-11.3125	11.4688	5.375	-22.9062	-7.9375		0.0068
0.00684	-23.4062	-1.71875	3.46875	-4.71875	-11.7188	-9.28125	9.0625	18.0312	-28.875	-5.5625	-9.125	-2.875	0.00684	39.75	-23.5625	18.6562	-22.5938	-9.875	-14.0625	-14.5625	-32.8125	-2.6875	13.1875	-19.5	-3.46875	8.125	-5.625	-4.1875	11.4688	-11.625	13.2188	-8.09375	-0.4375	-10.3438	0.00682	27.5312	2.5625	-26.1875	-11.75	18.7812	14.5938	10.9688	7.4375	5.84375	6.40625	24.5938	-14.5625		0.00682
0.00686	17	18.8438	2.875	-10.5625	-8.8125	28.3125	7.90625	-20.4688	-27.5938	13.8438	-12.0312	-12.9375	0.00686	-18.5625	-13.75	-9.125	9.53125	-6.25	0.59375	25.5625	-7.375	29.7812	-22.3125	-9.5625	-7.0625	-1.9375	38.3438	-14.125	4.5625	-0.28125	-4	-33.6562	-9.1875	-8.78125	0.00684	-25.2188	18.9688	-0.34375	-11.5625	-26.8438	25.7812	7.03125	4.09375	-2.75	-2.5	3.09375	20.8438		0.00684
0.00688	-17.9688	-26.5	-32	-11.875	26.625	-14.9375	-18.6875	-17.5938	13.5938	40.0938	16.9375	20.5938	0.00688	-17.875	1.65625	-53.7812	-41.4688	27.5625	-19.0625	2.3125	-16.5625	-33.2188	3.28125	-9.53125	-19.3438	0.53125	-30	15.7188	-13.9062	-41.25	-16.7188	8.71875	21.6875	-16.5938	0.00686	-28.2812	-12.0938	-8.1875	-5.59375	-18	-2.1875	-26.9062	-18.75	1.65625	-2.71875	5.90625	-15.25		0.00686
0.0069	-2.46875	3.25	8.875	-3.90625	-3.53125	-3.96875	-5.625	21.0625	6.09375	5.09375	14.0312	37.375	0.0069	27.875	-35.7812	22.4688	-5.09375	6.8125	2.59375	-31.7188	-1.78125	-14.4062	5.0625	20.125	-5.375	-11.5625	0.96875	8.90625	-10.1562	-4.3125	24.7188	-8.21875	3.25	-13.25	0.00688	24	2.90625	-10.7188	34.8125	5.5625	-30.5312	5.0625	-11.5938	-17.9375	0.40625	-28.4688	-3.40625		0.00688
0.00692	25.8125	9.28125	12.125	25.1562	-4.09375	13.2188	11.3438	-3.75	-2.78125	-25.5	-17.4375	14.3438	0.00692	-3	14.4688	-4.28125	31.9688	1.78125	4.5625	15.9688	25.7188	4.65625	-9.875	5.375	-4.3125	-9.25	-1.25	-2.84375	-19.5312	19.4375	16.0938	-13.2812	-12.3438	3.84375	0.0069	-11.8438	-5.5	-20.9062	1.5625	-2.75	30.125	-11.4375	11.2812	-15.125	-5.15625	-10.5	11.4688		0.0069
0.00694	-7	-10.4688	-32.4062	-6.5	3.28125	-23.125	-20.375	4.84375	15.8438	-6.5625	-25.375	24.375	0.00694	-6.78125	15.7188	-40.5312	-35.125	-9.3125	-2.6875	7.125	-3.09375	-27.4375	-15.75	1.5625	-7.28125	22.2188	-29.9375	-18.0938	-4.6875	2.4375	-33.375	-0.375	1.84375	-7.625	0.00692	-21.7812	-13.4062	10.7812	-20.4688	-7.75	4.875	-14.9375	-14.8125	33.4062	4.75	-20.5	2.96875		0.00692
0.00696	-21.9688	-50	-20.625	-15.1875	-32	-17.9062	-17.2188	18.875	-14.5625	28.75	40.8125	8.8125	0.00696	7.15625	-41.0312	10.4062	-10.8125	16.9375	-5.84375	-27.9688	-17.75	-29.9688	13.8125	-1.125	23.9062	-15.3125	-3.53125	12.9062	1.90625	-25.3125	9.3125	9.875	-11.125	9.875	0.00694	12.2812	-1.125	4.84375	-22.5938	20.4062	-14.8125	-11.0938	8.28125	-15.0625	-2.75	27.7188	1.71875		0.00694
0.00698	22.4375	22.125	10.375	33.1875	15.4062	0.28125	6.625	-2.59375	-4.09375	-21.5	9.25	8.53125	0.00698	15.8438	8.34375	-9.71875	14.9375	-7.34375	23.5938	-9.53125	13.125	23.3438	-14.9688	27.75	5.3125	-36.875	-4.5	-16.4375	-16.7812	-7.46875	15.2188	-18.8438	-3.34375	-20.875	0.00696	-3.40625	11.5312	-1.0625	-18.875	-20.2188	12.9375	1.875	4.40625	7.59375	-21.2188	1.625	-9.6875		0.00696
0.007	6.84375	11.8438	-27.0625	-4.8125	5.46875	31.9688	13.9688	13.8125	20.7188	-1.5	-19.2188	6.40625	0.007	-25.4062	28.7188	-40	-20.625	11.0938	40.5312	2.84375	-23.125	-14.4688	-19.8125	-9.4375	13.4062	12.4688	-27.3125	-0.3125	5.84375	9.03125	-16.8438	9.53125	-14.5938	-24.1875	0.00698	0.59375	-4.1875	6.25	3.1875	-19.0625	-13.0938	-8.71875	-17.25	-15.3125	2.125	-11.3125	5.4375		0.00698
0.00702	-12.4375	-1.25	21.7188	-18.9062	-31.8125	1.84375	5.4375	4.875	4.90625	14.4688	-13.7188	-10	0.00702	1.1875	-11.0625	4.71875	12.2188	26.4688	-27.8125	-24.3125	-39.0938	-14.6562	6.5625	-4.71875	17.1562	-11.875	-22.125	-13.3125	5.34375	-5.875	-23.875	19.8125	5.75	-32	0.007	15.9688	-8.4375	-37.5	3.25	-8.59375	-46.9062	12.9062	-13.0938	-15.375	2.15625	20.9062	-3.34375		0.007
0.00704	3.03125	14.8438	27.5625	30.6562	6.40625	22.75	6.75	-8.125	1.9375	-22.4688	-1.90625	7.0625	0.00704	5.28125	-3.65625	13.25	35.2812	-23.9062	-6.5	-18.5625	5.65625	13.0938	-22.5312	23.75	-5.96875	-8.46875	-0.21875	-7.15625	-28	8.34375	-25.9375	-25.375	-28.625	4.8125	0.00702	-16.9688	-10.7812	-6.40625	7.03125	10.2188	-9.59375	-10.375	9.5625	-20.3125	-6.5	-1.4375	-2.625		0.00702
0.00706	33.4375	4.96875	-7.34375	-7.625	31.125	25.8438	-19.625	-15.7188	3.375	-10.0625	-27.2812	-10	0.00706	-31.4062	30.9062	-54.8438	-10.0625	-40.0625	-3.625	-6.125	-7.78125	3.375	-4.375	-29.2812	-4.4375	-2.8125	-17.9375	22.6875	-42.2812	25.4062	6.71875	-0.875	-17.25	20.3438	0.00704	-36.1562	-1.53125	41.4375	-26.2188	3.8125	33.5	-7.15625	27.125	-8.65625	12.7188	13.6562	-12.25		0.00704
0.00708	-27.9062	-20.7812	0.53125	-23.9688	-28.875	11.5	-21.4688	4.375	0.96875	5.8125	1.78125	6.0625	0.00708	-9.71875	-32.25	7.75	-26.5938	2.5	-23.5	-11.9062	8.34375	-46.75	-12.5	-42.1562	-7.8125	-16	9.09375	-15.5625	-8.21875	-5.0625	-39.5312	11.9375	44.2812	-17.1875	0.00706	5.0625	32	19.0625	13.2188	-14.0625	-12.875	-11	-5	23.3438	-1.25	-3.0625	-7.46875		0.00706
0.0071	-1.09375	-6.90625	-1.6875	8.0625	-10.6875	16.2188	30.5312	5.46875	-12.1875	-1.78125	16.9062	-31.875	0.0071	-23.7812	-3.59375	44.9688	20.6562	-7	-7.375	-3.625	14.6875	1.5625	-4.375	-13.25	-19.3125	16.9375	4.40625	-9.25	12.7188	-14.5625	-36.2812	-30.3125	-11.5312	-10.125	0.00708	0.875	-7.8125	-11.875	2	-0.9375	-15.5625	1.875	0.46875	-19.1875	-13	-21.3438	-10.6562		0.00708
0.00712	29.1562	21.3125	7.1875	-17.4375	41.8438	2.375	5.40625	9.78125	8.625	-14.5625	-3.65625	-4.65625	0.00712	-26.75	49.5312	-41.7812	-27.2812	-36.375	-20.7812	12.7812	-31.4375	25.25	-7.8125	-23.7188	-12.1875	-19.9688	0.90625	-24.5938	2.21875	-22.1875	0	-15.1875	-48.4688	2.125	0.0071	-43.375	-38.0312	12.4688	-5	16.2188	24.3438	12.4688	-12.5	-0.5625	-20.625	-13.4688	13.75		0.0071
0.00714	-37.75	-3.5	4.375	-41.0625	-20.7812	24.3125	-12.9688	9.90625	-37.2188	-4.78125	-17.1562	3.46875	0.00714	-31.4062	-55.1875	-14.9375	-34.2188	-3.53125	-22.2188	-21.5938	-5.53125	-38.8438	10.0312	4.96875	18.2188	17.5	0.6875	18.0312	13.4375	-20.5	3.96875	-0.65625	9.96875	5.21875	0.00712	-26.0312	12.5938	3.625	6.28125	-14.8438	-4.90625	3.71875	-17.25	6.4375	5.53125	7.40625	8.375		0.00712
0.00716	-39.125	-0.46875	-8.0625	4.21875	-28.375	12.5625	45.375	-13.0938	-7.03125	-5.5	-9.0625	-9.4375	0.00716	9.34375	-16.9375	33.25	1.46875	16.2812	-24.7188	1.15625	13.875	8.65625	2.90625	-6.5	40.6875	-24.0938	-1.5	-16.4375	-7.8125	-1.28125	-6.875	-7.3125	0.9375	8.4375	0.00714	18.375	38.75	-1.90625	19.8438	-8.8125	-7.25	-3.53125	11.9375	-10.5	2.71875	31.4375	-1.4375		0.00714
0.00718	-6.6875	0.78125	-1.875	9.90625	24.0312	-17.25	29.2812	-35.6875	-5.25	7.53125	1.21875	14.8125	0.00718	-2.40625	10.375	-35.5625	-6.96875	-15.875	-5.75	31.4062	-30.0625	21.1562	-4.15625	-2.625	1.375	-15.0938	3.59375	-2.96875	-8.15625	-2.28125	-5.15625	-9.53125	-15.6875	-10.9062	0.00716	-3.875	1.25	-1.65625	-7.46875	26.75	17.75	-19.2812	-32.4375	0.0625	14.0938	-26.375	-15.3125		0.00716
0.0072	17.625	-21.0312	-47.625	-40.625	-16.7812	-12.625	-36.4375	12.125	1.96875	-1	7.75	-14.4375	0.0072	-2.0625	-25.5312	3.46875	-31.8125	-12.5312	-18.5625	-17	4.09375	-36.5938	4.9375	-20.4688	1.9375	8.78125	-17.7188	20.4375	15.6875	-30.0938	3.5625	8.46875	15.875	-1.625	0.00718	-11.5625	8.3125	-8.8125	-8.09375	5.1875	-15.6562	6.03125	-8.84375	-3.8125	12.5625	5.8125	12.0938		0.00718
0.00722	-5.25	-28.2812	9.125	23.75	-40.4688	11.0938	-5.9375	0.65625	-13.25	-35.25	17.1875	-14.4062	0.00722	0.875	-43.9688	14.5625	-4.28125	-11.0625	-1.5625	-21.3438	3.5625	9.65625	19.625	10.1562	6.375	-2.5	14.1562	-15.9688	0.25	-0.34375	-13.6875	-2.65625	6.4375	6.59375	0.0072	21.4688	23.25	1.875	14.9062	-48.75	-10.0625	-4.59375	9.8125	-28.9375	7.84375	6.65625	-0.8125		0.0072
0.00724	-8.4375	3.25	23.8438	18.4688	-5.0625	8.8125	11.4062	-40.7812	8.90625	1.8125	1.375	-16.6875	0.00724	-20.3125	21	-20.3125	7.28125	-11.3125	5.4375	-5.875	-14.75	39.7188	-14.1562	3.46875	-26.4062	0	-10.7812	-13	-20.9062	9.34375	37	-34.625	-35.0625	-12.9375	0.00722	-8.71875	-21.7812	6.65625	3.53125	2.71875	-25.75	-4.0625	-15.625	19.2812	-2.03125	-29.1562	-17.375		0.00722
0.00726	13.5	-29.6875	-15.7188	-20.75	14.375	-21.8438	-7.1875	27.625	-6.4375	23.5312	0.09375	6.34375	0.00726	26.5312	-6.59375	-14.4375	-19.3438	-10.4375	-9.5	-1.09375	-25.75	-6.71875	5.09375	-42.875	-10.125	-8.40625	-40.9688	-32.9375	6.5	-6.90625	-24.9688	3.28125	15.0625	-15.8438	0.00724	-22.2188	-5.125	-13.2188	-9.4375	-5.8125	-24.2812	-13.9062	4.78125	-0.1875	-2.71875	3.5625	19.8438		0.00724
0.00728	6.03125	9.15625	0.21875	20.5	-50.7188	18.1875	-7.53125	5.34375	-8.5625	-15.5625	-22.4375	6.96875	0.00728	10.1562	-34.1875	4.8125	-7.71875	2.09375	7.8125	-16.5	3.3125	-22.5625	21.3438	12.6875	-16.8125	-35.4375	7.09375	1.3125	15.0625	19.2188	-0.0625	-0.8125	-1.0625	-4.53125	0.00726	41.75	3.71875	3.125	21.9062	1.65625	-7.03125	-2.46875	21.4062	4.125	13.9375	32.7812	2.78125		0.00726
0.0073	4.84375	22.9688	-4.90625	18.4375	-6.84375	-8.8125	-33.8125	-30.5625	36.7188	-34.2188	22.1562	-10.7812	0.0073	-5.9375	26.9375	-14.8125	3.28125	-18.5938	13.0938	21.0625	-6.375	25.875	-13.7812	5.6875	-33.4062	13.6875	-14.0312	-2.90625	-30.6875	-11.875	23.8125	-32.6875	-17.5625	-11.0938	0.00728	-1.1875	-9.78125	-18.25	-21.2188	-0.65625	1.6875	-11.625	-17.4688	14.4375	-29.4375	-10.7812	-23.1562		0.00728
0.00732	-19.0625	-7.84375	-12.9688	-29.9062	41.4375	-25.375	-18.2812	-2.75	-18.375	20.8125	-0.40625	13.5938	0.00732	19.3438	-21	-57.8438	-21.1875	-4.46875	-8.4375	2.9375	-8.625	-4.8125	-30.7812	-24.7188	-15.7812	-14.6562	-4.21875	3.1875	-10.5	-19.5	-8.71875	-3.125	-7.59375	-3.09375	0.0073	-15.9688	-18.6875	-8.34375	-19.0312	-21.9062	5.03125	-6.1875	0.5625	36.25	-0.15625	-0.34375	11.9062		0.0073
0.00734	-6.28125	-24.6562	-21.5312	-7.5	-20.1875	39.625	-20.9688	-4.09375	-37.625	-3.625	-25.625	-18	0.00734	-17.1562	-26.5312	32.9375	-7.875	1.1875	-0.96875	-18.375	8.40625	-19.1875	2.84375	4.53125	7.125	14.2188	-12.75	3.96875	-11.0625	4.4375	-16.75	14.5625	-0.0625	16.0938	0.00732	0.84375	-21.5	-12.625	-0.03125	3.75	21.7188	27.125	40.4062	-19	-27.2188	14.9375	-4.65625		0.00732
0.00736	4.40625	22.3438	56.5	22.7812	-16.6875	-17.625	13.3125	-58.5	27.0938	-33.6875	-16	-33.7812	0.00736	-14.1875	24.4375	13.8438	10.2188	-11.1562	-7.75	12.4062	-4.40625	-1.09375	-36.9375	-5.9375	-23.375	2.53125	3.0625	-32.1875	-15.625	-0.125	1.9375	-8	-7.125	-37.9062	0.00734	-20.4688	1.8125	1.96875	8.4375	-12.4688	-9.78125	-16.75	-16.0938	24.4688	-11.8125	-48.4688	-10.3438		0.00734
0.00738	-0.875	-14.3125	7.4375	-15.2188	19.0312	-27.125	-1.53125	-4.25	-4.34375	22.0938	28.0312	20.4062	0.00738	10.6562	-7.625	-13.7188	-29.0312	-22.1562	14.5625	14.125	4.625	-18.4062	2.75	-28.3438	-21.875	11.3125	-2.4375	22.6875	-12.3438	-6.34375	30.3125	-13.6875	-17.1562	-6.90625	0.00736	12.5625	-8.09375	-30.9688	-6.0625	22	10.2188	-11.4062	-39.25	14.9062	4.84375	14.7188	-6.0625		0.00736
0.0074	5.8125	-4.25	-41.7812	-11.4375	12.0312	15.9062	7.5625	19.125	-15.6562	15.3438	-10	-5.09375	0.0074	-16.5	-2.25	16.375	23.3125	-9.53125	4.5625	-27.8438	6.4375	-25.875	6.9375	21.0625	47.8125	9.875	-8.15625	53.5625	6.875	10.25	-20.4688	-3.65625	29.2188	24.75	0.00738	-8.0625	0.53125	3.5625	9.53125	-5.65625	13.8438	7.34375	25.5625	-25.0625	7.40625	30	43		0.00738
0.00742	-14.25	30.75	19.5	20.2812	-3.53125	41.9688	7.3125	-27.75	7.5	-23.7188	-9.125	-16.4688	0.00742	-7.75	2.65625	3.375	11.4688	-9.09375	-5.4375	0.125	-6.03125	-6.8125	5.5	28.0938	-22.6562	-12.0312	31.9688	10.1875	-8.5	-14.0625	-21.375	15.8438	-2	-0.5	0.0074	-29	23.875	23.5312	-11.2812	-28.9375	-19.25	-9.3125	-30.8125	10.4062	-2.53125	-4.96875	-37.9375		0.0074
0.00744	-11.875	-1.25	11.75	-18.5938	32.625	-22.25	4.15625	2.34375	-2.78125	17.4062	14.5938	6.21875	0.00744	-5.53125	22.7812	8.90625	-40.4062	-17.9062	-36.5312	3.0625	-15.1875	-21.4062	-15.125	-40.3125	-19.9375	-13.625	0.75	11.5625	-14.625	3.96875	20.9375	4.15625	-16.6562	-40.5	0.00742	-9.5625	-60.9062	25.625	-32	5.46875	-11	-37.5938	-35.5625	6.21875	-4.5	-1.78125	-33.1875		0.00742
0.00746	8.46875	-16.6875	-13.9375	-3.90625	-19.0312	-15.9062	7.84375	27.625	-45.0938	21.4688	-19	12.125	0.00746	-14.7812	10.7812	-19.4375	16.5312	13.75	10.0625	-22.625	-1.34375	-8	13.8125	25.1562	25.9062	-22.0312	-22	21.125	11.5312	-16	5.90625	-5.53125	31.9375	5.3125	0.00744	28.9375	-4.65625	-20.6562	14.1562	-7.90625	-18.0312	-19.1562	-14.9062	-0.78125	6.3125	10.625	24.4062		0.00744
0.00748	17.5625	17.1562	-18.1875	-5.8125	19.375	37.8438	8.34375	-8.0625	12.875	-25.7188	7.65625	-24.5312	0.00748	-18.2812	32.2188	-21.9062	22.25	25.2188	47.75	-14.0625	2.4375	40.0625	8.8125	38.8125	-12.8125	15	1.6875	-7.28125	29.875	7.75	-21.625	-14.625	-20.8438	21.0625	0.00746	-5.84375	-0.4375	7.9375	-15.2812	4.96875	17.25	-8.875	8.25	-12.0625	-3	-12	-6.5625		0.00746
0.0075	-5.8125	-14.25	12.9688	-24.3125	-9.78125	-6.6875	-2.21875	7.4375	48.75	-19.6562	7.53125	-13.0312	0.0075	-1.375	8.34375	13.3125	-35.375	-13.8438	-17.8438	19.5938	-27.9375	-9.28125	-27.8438	-34.4375	-17.3438	-4.40625	-0.75	1.9375	-32.5	5.4375	-56.3438	-4.25	-15.5625	-27.375	0.00748	-11.0625	-2.625	-31.5312	-25.875	-38.3125	-45.7188	13.1562	5.625	-7.28125	-7.46875	-33.4375	26.2188		0.00748
0.00752	-6.21875	-18.6875	-19.3438	-7.96875	-26.5312	-30.625	-11.5938	23.7812	-13.6562	34.1562	-33.3125	30.8125	0.00752	9.96875	1.3125	5.96875	8.28125	-24.8438	-31.2188	2.6875	-3.09375	-28.7812	-3.1875	-23.5	1.28125	-16.8438	-44.2188	3.40625	-3.8125	-17.375	-1.21875	3.0625	15.4688	-13.6875	0.0075	35.5	26.4375	-12.7812	12.4688	-1.90625	-11.7812	30.5625	-0.9375	-23.6875	3.53125	22.5938	20.1875		0.0075
0.00754	31.125	3.6875	-0.875	11.5938	17.9375	11.7188	3.4375	-25.5625	-1.71875	-11.5312	6.6875	-16.875	0.00754	-33.3438	34.4062	-50.4375	12.9062	23.5625	14.0938	-27.2188	-2.625	2.71875	-4.46875	13.1875	11.625	7.78125	6.9375	-19.125	21.2812	22.25	15.0938	6.65625	-5.625	19.7188	0.00752	-23.4688	-11.4375	5.0625	0.21875	-0.28125	6.59375	-7.71875	22.5938	9.21875	-8.90625	4.0625	-31.0625		0.00752
0.00756	-16.125	0.59375	3.375	-7.96875	30.7812	8.46875	5.3125	-8.5	17.4375	-17.5	-22.9688	-7.3125	0.00756	-35.9688	-3.03125	-18.3438	-13.75	-14.9688	16.6875	-20.25	-9.6875	11.75	14.5312	-29.0625	-51.7188	-39.9062	38.9688	11.4062	-12.0625	-2.8125	-8.21875	10.4062	-22.3438	-40.5312	0.00754	-17.0938	-11.2188	-2.6875	-31.375	-13.9688	1.21875	-21.6875	-21.25	-4.375	-11.625	0.4375	-16.7812		0.00754
0.00758	-24.9062	-16.625	-4.875	-3.59375	-50.5312	-20.2812	2.3125	42.9375	-12.8438	21.625	-30.4375	17.5	0.00758	16.4375	-21.5625	41.1562	19.6875	3.71875	-34.7812	-23.5625	-20.3438	-27.2812	-13.5938	-14.4375	-22.5	-9.40625	-49.75	-12.5625	-16.7188	-1.71875	-11.6875	-18.8438	-17.125	-7.34375	0.00756	22.9062	0.0625	0.59375	-13.9375	10.375	-8.46875	14.3125	-17.1875	-7.46875	-15.2812	-11.7812	-2.96875		0.00756
0.0076	3.46875	24.125	17.375	28.875	-4.875	-18.875	14.0312	-21.625	-29.25	-33.875	-22.0938	-21.125	0.0076	8.6875	20.6875	-8.90625	-3.25	0.8125	-6.4375	-11.6562	30.0938	-5.375	-39.9375	5	12.5	0.21875	-6	-22.8125	2.375	-2.1875	22.4062	6.34375	-0.65625	13.375	0.00758	22.1562	-2.1875	32.625	28.4375	0.5625	-3.6875	4.46875	-7.375	-9.40625	26.3125	-24.375	-15.9375		0.00758
0.00762	15.5	47.5312	-9.6875	-5.3125	35.5	-3.09375	5.0625	-10.7188	31.2188	-13.2188	27.875	-40.25	0.00762	-28.1562	-2.4375	-5.8125	-8.46875	-5.5625	-10.1562	-7.90625	-11.2188	21.5625	9.65625	-15.5	-28.25	11.0938	-7.4375	14.1562	-14.8438	-18.875	-13.8438	-8.46875	-8.90625	-1.40625	0.0076	-13	-23.9375	-20.25	-2.5	-1	-7.84375	-1.34375	-0.5	-10	-8.46875	29.3125	-8.625		0.0076
0.00764	-27.625	21.5938	-9.40625	5.28125	-29.1875	30.3438	-3.34375	16.8125	5.21875	-15.2188	5.40625	0.9375	0.00764	-15.9375	-43.1875	31.4062	-23.7812	-13.2812	-10.1875	-0.46875	-19.25	11.1562	3.28125	-38.5938	9.65625	-34.7812	-8	0.84375	-27.5	-29.4688	-30.875	-26.5312	-9.40625	-17.7812	0.00762	11.9688	42.1875	-24.125	4.1875	0.3125	1.34375	29.8438	-1.96875	2.875	-13.125	-1.25	-2.8125		0.00762
0.00766	1.75	-19.9375	15.625	30.375	-19.5625	-14.8125	17.875	-5.15625	-19.5	-25.0312	-1.5	0.40625	0.00766	21.375	-6.65625	-9.21875	24.0938	-27	-13.8125	-10.7812	23.5	7.5	17.9062	-14.25	31.9688	16.25	14.2188	-28.4688	3.03125	2.3125	-22.0625	-10.6875	19.2188	23.4688	0.00764	-11.7812	-4.59375	-2.3125	-2.15625	3.59375	10.5938	-41.4062	5.59375	5.875	-2.5625	-23.25	-26.4062		0.00764
0.00768	8.65625	20.5625	-2.6875	-6.03125	21.8438	-16.0625	-19.6562	-38.4375	15.875	-7.75	-2.5	-18.5938	0.00768	-13.7812	12.8125	-30.8438	-30.0625	2.1875	5.3125	-15.1562	-20.2188	7.34375	11.875	18.0938	-23.75	33.7188	12.8125	2.875	5.5625	-12.9062	8.3125	-16.6875	-33.9688	-16.4688	0.00766	-15.4375	-19.4375	-12.875	-0.09375	-1.4375	22.0312	1.375	-9.8125	-2.21875	0.8125	12.2812	-5.21875		0.00766
0.0077	-35.9062	-22.5	-9.375	-28.125	-46.0938	-8.875	-25.6875	20.25	-13.1562	9.8125	-4.5625	16.2188	0.0077	-11.9688	-35.7812	-9.46875	-31.375	8.3125	-38.8125	10.75	-5.125	-13.9688	-25.1875	-13.5	-10.5	-40.125	-34.5938	16.4375	-29.2188	-41	2.1875	-4.3125	10.8438	-20.9688	0.00768	-4.25	16.4062	-13.4688	-1.25	-0.3125	-19.8438	17.9688	-13.8438	19.7812	4.96875	13.5312	0.0625		0.00768
0.00772	-18.25	-5.53125	14	33	-22.4062	13.1562	14.7188	-23.4062	-27.2812	-2.28125	12.2188	-17	0.00772	31.2188	-35.2188	22.4688	3.21875	-23.2188	-15.4062	2.5	-38.2812	3.8125	2.96875	18.5625	29.9375	2.65625	-3.5625	-33.2812	17.3125	6.9375	-12.7188	4.59375	29.625	27.25	0.0077	11.3438	-4	-4.15625	-12.125	6.46875	5.21875	-27.25	11.0625	-7.125	7.4375	-10.4688	10.0625		0.0077
0.00774	-3.0625	19.9375	11.125	-20	52.4688	9.96875	3.25	-1.8125	-14.4688	-33.5	12.0625	-18.4375	0.00774	19.375	6.46875	-27.5312	-20.3125	-9.25	11.9688	6.40625	-8.84375	3.65625	-1.1875	5.5625	-3.25	17.9688	-1	26.3125	5.9375	4.1875	-4.15625	10.5	6.09375	9.5	0.00772	-12.4062	-18.9062	-1.875	-2.84375	-19.0312	-24.375	5.375	12.9062	-20.9688	-6.09375	-27.7188	-21		0.00772
0.00776	9.84375	-7.15625	-15.3125	-23.9688	-42.75	-40.4375	-16.7812	10.4375	6	-4.46875	-8.25	26.25	0.00776	-38.0312	-31.1875	-11.1562	-16.25	10.7188	5.84375	-3.1875	-21.4062	-22.5625	-7.78125	-18	-26.3438	-22.5625	-2.34375	10.8438	-6.3125	-26.3125	22.75	-4.125	30.125	-34.1562	0.00774	0.625	0	-12.5	-0.90625	-6.28125	2.3125	-9.375	-20.375	-21.75	2.53125	21.9062	4.0625		0.00774
0.00778	-5.96875	-32.9688	1.84375	24.2812	-29.5938	15.4062	6.4375	-27.2812	0.84375	13.3438	3.71875	-14.6562	0.00778	3.21875	-26.7812	5.84375	17.875	9.75	-15.2812	-44.125	0.96875	-11.75	-17.9062	3.03125	9.375	-23.2812	-29.5625	-31.6562	-20.75	22.5625	27.5	7.65625	20.2188	7.5	0.00776	28.9062	12.6875	-3.46875	12.7188	-19.625	27.3438	-14.5625	-15.6562	-12.9688	-5.59375	-31.875	2.84375		0.00776
0.0078	-2.34375	-15.6562	-5.8125	-2.9375	32	8.8125	-19.75	-18	16.7188	-4.21875	15.6875	-2.5	0.0078	26.5625	23.9375	-29.0625	9.375	-11.2812	10.4062	-6.9375	25.3125	38.3125	7.71875	10.5312	-23.6875	10.7188	30.625	-36.4688	30.6875	-2.9375	-31.5312	-13.25	-25.3438	3	0.00778	-17.8438	-44.5938	6.71875	-11.0625	-0.75	2.78125	-9.84375	-19.7812	23.3438	-2.75	-30.4062	18.3125		0.00778
0.00782	7.53125	17.6875	-23.5938	-17.8438	-11.7812	4.125	-27.7812	40.0625	-7.3125	27.5312	-39.375	5.625	0.00782	4.5625	-20.75	11.6562	-17.4062	-0.03125	10.5	32.5312	-20.2812	-9.65625	5.96875	1.34375	-28.2188	-16.875	-3.65625	41.0312	-13.9062	-12.5625	-4.625	3.6875	-9.09375	-19.3438	0.0078	-34.4375	3.3125	-0.46875	-9.46875	13.25	14.3438	0.6875	58.1562	9.15625	-18.6562	21.9375	15.5938		0.0078
0.00784	-14.7188	-11.0312	1.875	-11.2812	-37.8125	5.40625	-5.375	-10.625	-0.21875	-23.0312	-4.625	-17.5312	0.00784	18.4375	-14.6562	11.4062	-17.5625	-32.8438	-4.875	-7.3125	-9.65625	-34.75	-20.7188	-8.96875	10.4062	-0.4375	-43.1562	-38.9062	-16.9375	1.3125	23.8125	-15.9375	46.0625	-24.6875	0.00782	-2.3125	4.96875	17.25	12.125	15.5312	-14.9062	-4.75	18.875	-4.40625	4.15625	-1.8125	4.90625		0.00782
0.00786	12.375	12.9688	13.5625	27.4375	25.7812	-9.21875	27.6875	-45.6562	19.4062	-1.5	11.25	9.5	0.00786	29.5	24	-25.3125	25.25	-24.0938	1.96875	19	1.40625	27.5	-7.46875	-10.5	-31	35.8125	-11.9375	-35.7812	-2.5	38.4062	12.0938	6.5625	-18.3125	19.0938	0.00784	0.375	-15.75	-20.3438	0.5625	17.9688	13.2188	-24.9688	-36.0938	-21.7188	-16.5625	-30.375	-12.8438		0.00784
0.00788	4.90625	-9.59375	-11.3438	-23.0938	37.1562	-2.0625	-24.625	34.8125	3.21875	22.5938	-21	2.71875	0.00788	-20.1562	-13.375	-8.125	-26.625	11.1562	19.1562	1.28125	-24.4688	-8.5	-19.0312	4.25	-12.375	-16	27.8125	53.375	-50.5	-17.875	17.4688	14.1562	9.53125	4.53125	0.00786	19.625	-8.1875	-23.4375	-17.5312	1.1875	-13.9688	-2.5	-13.6562	-15.9375	23.1875	6.28125	-19.9375		0.00786
0.0079	1.1875	-25.6562	-14.5312	-0.8125	-40.6562	18.75	5.1875	6.6875	10.6562	0.15625	-17.25	-16.7188	0.0079	-11.625	-23.625	33	4.34375	-7.78125	-11.25	-22.875	-3.21875	-31.9375	4.84375	-16.2188	1.15625	-28.5938	-7.84375	-5.1875	-3.125	-23.8438	24.8438	-43.6875	13.0312	-15.8125	0.00788	-26.5	11.9375	2.5625	-48.5938	-21.375	-7	16.1875	1.3125	-1.875	6.34375	-4.875	-8.375		0.00788
0.00792	18.375	50.9688	1.96875	39.125	13.5625	23.0312	27.5625	-44.5312	-6.09375	-33.6562	7.46875	-21.5312	0.00792	-22.0938	17.9062	-14.7812	38.7188	-39.9062	-2.3125	10.2188	25.5312	9.4375	0.4375	9.34375	0.03125	11.9062	-5.5625	-29.4688	4.15625	23	6.40625	1.3125	-6.9375	13.8438	0.0079	-27.5625	6.75	17.1875	-3.78125	-32.2812	-7.46875	-7.375	2.53125	19.8438	-18.4688	-5.15625	-20.3438		0.0079
0.00794	4.46875	-20.4062	-26.5312	-25.7812	14.8438	17.7812	21.25	14.8125	4.59375	38.875	-8.4375	15.0625	0.00794	-23.2188	-13.6562	-21.2188	-27.3438	-3.375	-13.2812	-6.71875	4.03125	-12.8438	-9.90625	-4.15625	-8.5	-5.25	32.6562	39.1562	-9.25	-17.0312	-5.40625	-2.78125	-20.25	9.90625	0.00792	-17.1562	1.25	-19.3438	-2.5	18.7812	1.34375	10.6562	-1.3125	-8.15625	-9.34375	7.96875	30.6562		0.00792
0.00796	-0.1875	-30.9062	0.4375	-34.7812	-19.3125	0.53125	25.5625	33.9688	10.2812	8.65625	-5.78125	-46.1562	0.00796	6.34375	-31.8125	28.3125	-25.0938	8.65625	-21.7188	-3.625	-15.5938	-41.8125	1.21875	7.15625	20.375	-7.875	-11.625	-37.8125	-11.1562	-2.25	-0.21875	3.90625	12.5938	-14.5312	0.00794	-2.84375	28.3125	12.3438	-6.25	-1.21875	19.875	-10.4375	20.9688	-15.5312	15.75	-8.53125	16.2812		0.00794
0.00798	-21.4062	39.1875	11.7812	6.4375	17.9062	6.46875	32.6875	-34.2812	-1.65625	-11.3438	13.2188	-6.96875	0.00798	16.0312	23.2812	-3.21875	15.9688	-20.9688	-10.9688	7.90625	6.75	13.125	9.0625	17.5	-4.40625	-15.0938	-24.4688	-40.1562	0.6875	1.46875	-22.25	3.9375	9.59375	-19.8438	0.00796	12.2812	-36.375	27.3438	5.4375	2.5	8.96875	-28.8438	-19.75	-3.3125	-25.125	2.46875	-17.875		0.00796
0.008	-10	-3.59375	-1.90625	-29.125	16.875	-25.7812	12.9688	18.4688	-5.40625	46.5312	-12.1562	42.1875	0.008	-25.0938	11.8438	-20.25	2.34375	-16.7812	-7.625	12.125	-35.7188	13.75	-19.9375	-6.78125	-26.6562	24.75	-16.9375	22	19.9375	-6.125	-5.375	6.84375	-29.0625	5.5	0.00798	-13.8125	-13.5938	-24.9375	-18.2812	-23.3125	2.53125	16	13.6875	2.09375	-13.1875	15.8125	19.75		0.00798
0.00802	-4	-18.5625	-16.1875	-45.3125	-33	7	-2.25	29.2188	-11.375	27.25	-11.5625	-3.84375	0.00802	-30.8125	-17.9062	0.21875	-11.0938	43.5312	2.71875	-6.3125	-13.8438	-34.4688	-15.1562	-0.84375	26.375	-20	14.0938	24.9062	-31.125	-23.4062	23.6562	7.3125	1.15625	-22.875	0.008	23.9375	21.4062	-18.875	-7.96875	-22.0938	-24.2812	-12.4375	7.90625	-7.21875	-1.3125	27.3438	11.0938		0.008
0.00804	-5.59375	17.125	-28.2812	21.4688	-26.3438	-28.0625	9.6875	-26.7188	-13.2812	-5.09375	19.9375	-28.2812	0.00804	20.75	7.96875	-8.375	22.5625	-11.4062	2.6875	-15.1875	14.5312	4.6875	22.4375	-15.5312	-9.125	-27.2188	-13.7812	-23.625	-9.40625	-3.96875	-22.7188	-0.4375	-28.5312	-3.96875	0.00802	-16.3438	-4.3125	23.9375	26.0625	27.4688	-10.5	-5.21875	-33.8125	-12.7812	26.4375	-8.9375	-23		0.00802
0.00806	-7.65625	-35.5312	-19.5625	13.8438	7.90625	-5.875	-5.28125	3.5	21.5	22.125	3.40625	17.9062	0.00806	-30	-5.875	-26.4062	8.46875	-3.71875	-14.5	-12.2188	-32	26	-17	1.65625	-36.7812	7.46875	-2.34375	-8.25	14.9062	20.9688	5.8125	-1.46875	-45.9688	20.75	0.00804	-10.1562	-2.6875	-30.4062	-7.78125	3.15625	-1	3.96875	-2.28125	6.65625	-3.375	-12.5	22.0625		0.00804
0.00808	-11.5312	-49.4688	2.25	-21.2188	-14.7812	22.6875	4.21875	28.4688	-12.625	21	-42.4688	10.8125	0.00808	-24.1875	-17.1562	3.40625	-21.75	-1.78125	-2.65625	-42.0938	-13.8438	-21.4062	-13.7188	25.0938	-12.5	-26.1562	-4.375	-3.34375	-11.9062	-26.8125	-13.5	-35.0938	4.375	-6.78125	0.00806	3.375	-1.34375	19.1562	-23	-0.84375	-23.8438	-5.90625	2.1875	-16.0938	-10.25	-10.9062	30.7188		0.00806
0.0081	11.6562	14.625	6.375	35.6562	-40.25	-12	-8.8125	-38.9062	10.8438	-35.9375	25.75	-32.625	0.0081	-3	-5.59375	15.7188	19.625	14.4062	-9.46875	-33.5625	12.9688	12.3438	0.40625	25.7188	32.3438	-25.7812	-10.1562	-40.8438	-20.25	-10.6875	-21.6562	-13.2812	-30.4062	-49.625	0.00808	-7.46875	-25.625	24.1875	-3.46875	6.53125	-7.375	7.96875	-21.125	-33.0938	14.5625	0.84375	-41.8125		0.00808
0.00812	2.625	-1.71875	25.4375	-1.9375	20.7812	-4.4375	-23.1562	-50.4062	-8.34375	-7.625	10	-1.96875	0.00812	1.78125	2.5625	-36.7188	-20.0938	5.90625	2.4375	11.4688	-23.8438	20.6562	-13.3125	-22.9375	-36.4062	14.5	-27.2188	-2.15625	-11.4688	37.8125	-16.8438	19.0938	-43.7812	2.3125	0.0081	-15.3438	5.21875	-2.875	14.4375	4.5625	3.40625	7.90625	12.3125	8.78125	-12.0312	11.5312	-4.625		0.0081
0.00814	-17.1562	-21.8438	24.5938	-8.125	-3.59375	-38.5	-17.8438	1.96875	18.9375	-5.09375	-36.5625	37.8438	0.00814	-33.7812	-10.0938	20.1562	4.46875	-15.0312	12.0938	1.1875	17.4375	5.375	3.15625	3.5	4.375	4.0625	8.59375	21.9688	13.8438	-29.625	-19	-21.1875	-7.71875	-1.6875	0.00812	13.7812	46.375	-42.125	4.84375	-40.25	-14	7.21875	15	15.9688	19.2188	16.2188	9.03125		0.00812
0.00816	-18.8125	18.9688	5.1875	4.8125	-17.8438	4.28125	7.0625	27.7188	-18.8438	-47	-2.0625	-47.9688	0.00816	24.0625	8.3125	1.03125	5.34375	-6.21875	-7.46875	-24.125	26.1875	-11.1562	26.8438	28.3438	36.9062	-6.40625	3.25	-43.6875	-20.625	-11	-24.75	-7.15625	10.75	-28.3125	0.00814	1.96875	-13	-3	-28.4375	3.15625	8.59375	-41.75	-5.5	-9.34375	-4.15625	-8.90625	-18.3125		0.00814
0.00818	-3.34375	15.9688	-9.0625	-17.8125	10.5938	3.5	-10.2188	-33.4375	-5.125	9.9375	31.9688	5.1875	0.00818	10.5625	-11.625	-7.03125	-18.8438	-35.7188	-13.4688	2.96875	1.71875	1.3125	-20.0938	-7.21875	-27.0312	4.34375	-12.625	-7.9375	21.9062	1.40625	-12.0625	-17.4688	-11.9062	21.0625	0.00816	-21.9062	-17.625	-21.0938	-0.75	8.3125	-0.59375	19.9688	10.7812	-12.4688	-6	-40.6875	-6.25		0.00816
0.0082	-5.84375	-20.4062	-45.2188	-22.9375	-10.6875	-12.0625	-1.375	0.34375	8.34375	11.25	-11.0938	27.4375	0.0082	-7.40625	-41.25	-7.96875	-35.8438	-4.375	-26.7188	19.9688	6.09375	-12.4688	-29.125	-5	-38.0625	1.3125	-10.0625	10.125	5.09375	-17.5625	11.875	-25.625	-39.1875	51.875	0.00818	-20.4375	2.34375	-21.1875	11.2188	-14.625	13.2812	-3.21875	5.9375	11.9062	-16.5	-4.5625	24.2188		0.00818
0.00822	-13.4375	-12.8125	-0.28125	16.3125	7.9375	9.0625	-0.875	-13	-2	4.9375	8.5625	-21.9688	0.00822	9.9375	2.3125	-7.0625	-11.3438	-4.6875	0.0625	-17.3438	22.4062	-5.28125	21.2188	10.625	29.5625	-10.875	9	-14.8125	-11.125	-34.0312	1.40625	-15.4688	42.8438	-35.6562	0.0082	21.25	-1.8125	3.125	16.9062	1.03125	0.96875	-35.375	-0.21875	-12.9688	2.40625	14.875	-6.28125		0.0082
0.00824	0.96875	7.8125	11.4688	-27.5625	-15.7812	0.96875	-0.96875	2.4375	3.09375	-29.625	16.0938	-19.8438	0.00824	-7.9375	-19.5938	6.28125	-14.5	1.90625	-5.21875	0.5625	-26.7188	9.375	7.96875	-11.375	-15.2188	13.6562	5.09375	-10	4.71875	-1.71875	-12	20.4375	-3.625	-14.25	0.00822	-19.4375	-4.21875	19.4062	-7.09375	40.3438	21.2188	34.0625	2.875	-23.2188	16.4688	-12.0938	1.3125		0.00822
0.00826	-13.7812	-0.625	-17.9062	1.75	-7.25	7.96875	-36.4062	-0.71875	-26.1562	-12.0625	-0.40625	27.125	0.00826	-17.9688	-16.3438	-13.1875	-24.3125	-21	-33.4688	-9.71875	3.6875	-12	2.96875	-28.8438	-0.53125	-8	-12.6875	34.5312	-6.4375	8.84375	19.875	-17.2188	-18.25	29.375	0.00824	-17.4062	-28.5938	-19.125	4.375	-12.7812	-15.6562	-0.9375	7.53125	8.96875	-20.7188	13.2812	17.4062		0.00824
0.00828	19.1562	-6.28125	-10.125	7.65625	15.2188	0.6875	2.875	-19.25	-19.2812	13.5312	-1.59375	-16.3438	0.00828	3.75	4.21875	-12.25	-0.59375	-10.4062	-7.65625	2.71875	35.6562	-19.9375	1.625	17.5938	5.96875	-9.09375	13.1562	-25.8125	4.09375	-6.84375	14.8125	-15.125	4.03125	16.7188	0.00826	7.1875	47.5	-11.7188	2.34375	-15.4688	-22.1875	-45.2188	-25.75	-11.1562	-2	-23.4375	-11.5		0.00826
0.0083	19.5	2.625	-0.375	-9.53125	35.5	-8.4375	-16.6875	13.5312	7.21875	-24.3125	13.7812	4.875	0.0083	-9.0625	-15.5625	5.40625	-2.09375	23.875	17.5625	14.7812	-14.7188	1.03125	20.0312	7.96875	-12.6562	-2.625	-39.2812	-24.875	-14.2188	-20.9688	-8.125	22.5625	-0.125	-41.5625	0.00828	21.0938	-32.375	-11.8438	-10.5312	-1.59375	18.4375	4.75	-20.5	1.625	-0.375	-3.40625	-10.625		0.00828
0.00832	2.21875	9.65625	-23.5625	-20.5	-15.9062	4.90625	3.09375	14.9062	-0.03125	23.2188	0	19.4375	0.00832	10.8438	-20.0938	-9.0625	-5.375	-8	27.5625	31.125	-11.5	-2.5	-27.75	-20.2812	-5.46875	-16.125	-2.8125	6.90625	14.875	24.3438	-28.6562	-14.2188	-12.625	-1.875	0.0083	17.9375	-19.1562	-9.375	-7.125	-10.1875	16.9688	0.78125	11.5938	1.875	0.8125	-5.0625	7.78125		0.0083
0.00834	-23.5625	-9.78125	-21.5625	4.375	-3.375	-7.0625	7.75	-13.0312	7.3125	-7.25	1.34375	1.34375	0.00834	-9.28125	4.25	-12.5	7.71875	-19.8438	8.625	-21.9062	10.625	-5.34375	-3.84375	19.625	22.2812	10.7812	17.3125	1	-7.875	-2.6875	-1.15625	12.1562	6.5	21.4375	0.00832	-25.3125	-22.125	18.5938	-8.125	1.1875	-20.1562	-37.9062	-13.5312	28.375	-5.25	-15.8125	-9.8125		0.00832
0.00836	17.9688	-11.125	-8.6875	-31.0312	17.75	2.09375	-10.5	-2.15625	-23.9062	-42.4062	-9.25	-9.875	0.00836	-8.5	15.5	-17.5312	14.1562	19.9062	-5.375	-13.25	-18.4062	-1	-21.4062	-29.4062	-15.5625	3.75	-18	-29.3125	-14.9688	1.3125	18.0625	10.9688	15.6562	-55.125	0.00834	-25.75	-13.4062	-28.0938	3.21875	-30.2812	-16.5938	6.0625	1.09375	8.5625	9.21875	-28.4375	-1.9375		0.00834
0.00838	18.4062	27.8438	2.09375	-23.4062	-10.9375	-7.09375	-16.4375	19.9688	16.5312	3.46875	-40.0938	-30.4062	0.00838	8.65625	-40.5	3.375	-23.625	6.15625	24.1562	4.59375	-25.7188	-12.8438	-19.125	-0.59375	-22.6562	-20.625	-3.78125	3.84375	13.3438	22.3438	-10.1875	0.5	-18.5625	-1.21875	0.00836	4.8125	3.6875	3.6875	-1.59375	-6.5	2.1875	40.25	-19.3125	-20.1875	-50	29.2188	-0.9375		0.00836
0.0084	-10.2812	-10.9375	-9.71875	49.5312	-33.5625	14.5938	1.5625	-4.625	4.96875	15.8438	1.15625	-31.0312	0.0084	7.15625	9.96875	0.875	35.75	-27.0938	-12.6875	-5.34375	19.6562	-5.78125	-9.71875	0.15625	19.5938	-23.9375	-8.125	-4.46875	0.5625	-29.9062	5.375	-20.5625	-2.8125	23.9688	0.00838	4.78125	27.25	34.625	-20.875	4.84375	-3.8125	-15.6562	14.9688	1	-30.8125	6.6875	-8.46875		0.00838
0.00842	-0.4375	-8.625	1.9375	12.625	35.6875	-7.125	-5.875	-24.2812	2.59375	-12.2812	0.21875	6	0.00842	-16.5938	20.125	-6.125	-12.3438	-18.375	-4.4375	1.84375	34.625	11.5938	27.4688	13.75	-23.0938	3.84375	3.53125	-23.625	-34.2812	9.53125	-8	-6.03125	-2.59375	-24.7188	0.0084	2.625	-35.8125	0.46875	12.875	14.4688	3.0625	-8.5	2.0625	-3.59375	13.1875	-27.625	35.8438		0.0084
0.00844	0.75	-19.9688	17.875	-49.5312	-7.59375	11.5	-9.375	40.9375	12	-7.40625	-36.5938	-9.4375	0.00844	-31.4375	-19.75	22.625	-21.9375	1.3125	2.21875	-14.625	-22.6875	-14.4062	22.8125	-33.875	-30.3438	8.875	-0.875	21.5938	3.59375	1.15625	-22.6562	10.5625	-15.0938	-8.53125	0.00842	-3.3125	-2.46875	-7.28125	1.8125	-24.7188	-2.3125	26.8438	-1	-13.9062	-24.4062	33.1875	1.125		0.00842
0.00846	8.09375	17.8125	-22.0625	-8.96875	-22.0625	16.3125	-9.0625	19.9688	-3.90625	14.7188	3.84375	-16.375	0.00846	3.375	29.2188	-13.5312	41.3125	-9.71875	-5.6875	2.3125	-10.7188	-3.15625	7.75	-41.8438	37.875	-12.4062	11.375	22.75	-0.09375	-22.6875	-34.625	-20.25	1.125	-4.59375	0.00844	-28.25	17.25	2.84375	-35.3125	9.375	4.3125	1.8125	0.84375	11	1.46875	-2	-39.5		0.00844
0.00848	15.5625	14.6875	-2.375	34.1875	24.9688	-8	29.375	-36.7812	-17.4375	-0.96875	33.4062	-0.71875	0.00848	-31.9375	7.28125	8.71875	1.875	19.4375	-3.40625	7.125	11.4062	6.125	19	-12.3438	15.1562	12.8125	-9.625	-21.0625	-3.71875	0.65625	2.4375	-23.0625	16.8438	-7.375	0.00846	-9.9375	-12.6562	9.46875	5.21875	-7.6875	-10.8438	-5.8125	-2.40625	-23.7188	10.0312	-10.4062	-13		0.00846
0.0085	14.4375	-20.6562	10.75	-41.7812	-1.25	-15.2188	-16.4688	13.8438	-33.9375	-13.4062	-36.9375	21.7188	0.0085	-27.2188	-8	10.0625	-35.8438	-17.2812	-9.9375	-3.75	-15.9688	7.9375	10.3438	-13.875	-45.9375	-8.6875	0.03125	-15.4688	-5.59375	3.59375	-46.5938	35.8125	-1.21875	-14.0625	0.00848	-5.1875	-0.65625	-29.0625	-14.5	-13.4688	-30.4062	2.09375	-3.96875	-23.0625	22.2812	-6.34375	0.8125		0.00848
0.00852	7.0625	-24.4062	-24.75	-22.1562	-38.0312	1.03125	-10.4688	2.21875	12	-22.6562	-10.25	-9.75	0.00852	21.9062	-34.125	-8.875	-3.90625	-23.5	-19.5312	-21.75	4.96875	-59.3438	6.75	3.15625	12.75	-6.09375	10.4375	37.5	-2.5	-5.15625	8.5625	18.625	-15.8125	13.8438	0.0085	10.5938	-14	21.0938	-13.0312	17.9062	-13.5	-7.96875	-35.75	1.34375	10.3438	3.6875	-18.5625		0.0085
0.00854	-4.46875	-13.5	-11.875	38.375	5.5625	10.8438	19.125	-25.5	2.90625	-1.75	42.9375	-20.3125	0.00854	3.59375	15.3438	-14.9062	23.8125	0.90625	3.875	-19.9062	15.8125	16.25	7.21875	-1.40625	34.5938	11.9375	-12.5938	-35.4062	15.75	-24.7188	6.46875	-31.5938	-7.59375	-0.53125	0.00852	-11.1562	-18.5625	-0.78125	28.2188	-1.25	7.53125	-10.7188	-4.40625	-0.4375	2.46875	5.0625	-15.2812		0.00852
0.00856	8.34375	-25	-3.40625	-39.2188	14.4062	-26.1875	11.875	10.7812	-4.625	30.3438	-18.7812	19.5	0.00856	-40.8438	-21.0938	-5.25	-33.0312	5.40625	0.46875	-15.6875	-47.8125	7.1875	-1.5625	11.0938	-52.0938	-10.1562	8.125	-12.3438	-2.375	-2.875	-15.0625	23.8125	-20.75	-28.1562	0.00854	-15.625	9.96875	-49.625	0.375	-23.6875	-0.375	-0.625	-4.34375	-12.5312	-27.5938	-7.84375	33.9062		0.00854
0.00858	-0.8125	-8.375	0.03125	-35.125	-44.3438	-10.9688	0.28125	13.9688	10.8125	4.21875	-32.8438	-3.5625	0.00858	15.0938	-21.625	7.03125	-19.625	-3.5	-19.2812	-5.625	-24.7812	-11.7188	-4.28125	-30.9688	-10.25	-42.625	-3.90625	20.6562	-12.1875	15.6562	19.5	1.375	-13.8438	18.625	0.00856	-1.1875	-9.0625	-4.96875	7.9375	-5.4375	-34.5938	-1.5625	12.9375	-7.25	18.375	-16.0625	-17.125		0.00856
0.0086	-16.4688	9.875	16.3438	39.625	-23.0938	16.2812	2.25	-42.7812	-2.5625	-32.7188	39.1875	-26.1875	0.0086	26.8438	23.5625	-12.625	38	1.65625	-4	0.15625	21.875	20.6875	-7.34375	5.9375	53.4375	-17.2812	-20.7812	-38	-3.90625	-6.40625	-28	-22.4688	-15.625	10.8438	0.00858	6.78125	-12.8438	15.1562	6.28125	15.8438	8.8125	9.1875	12	26.1875	45.625	23.2188	-19.625		0.00858
0.00862	30.4062	-22.4688	-3.40625	3.3125	9.5	-10.5	-3.28125	-18.6562	-8.65625	8.40625	-14.375	24.1562	0.00862	-31.4688	-2.59375	-15.375	-26.375	1.5625	0.03125	0.5625	-17.375	25.0312	5.8125	-2.4375	-44.4688	28	-17.6562	-10.4375	-13	-10.25	-5.5	2.03125	-4.5	-32.875	0.0086	17.75	-0.90625	-17.0312	1.1875	-27.2812	16.4375	22.25	-13.9375	-21.9375	-15.2188	21	4		0.0086
0.00864	4.53125	-21.6562	-4.75	-23.0625	-28.0938	-9.0625	-46	20.4375	-9.875	-15.5	-22.5	9.5	0.00864	-6.34375	-3.21875	11.375	-6.84375	-23.5	-21	-25.9688	-16.8125	-17	-5	-19.5938	-25.8125	-13.4375	-6.46875	4.84375	-7.09375	12.0938	-33.8438	-4.15625	11.75	-8.84375	0.00862	9.875	32.8438	4.46875	-4.9375	-11.1875	-37.4688	-14.0312	-26.375	-8.21875	-7.78125	-26.125	-15.0625		0.00862
0.00866	-8	35.2188	-0.78125	37.75	-26	-19.7812	-34.5	-15.3438	14.0625	-20.0938	27.5625	-25.9062	0.00866	50.6875	-3.625	-12.5938	14.8125	-13.6562	0.28125	-23.2188	0.1875	25.7812	4.21875	-14.8438	18.6562	-42.8438	-1.65625	-22.9062	-8.625	-13.0625	21.6562	-27.5312	-27.6875	19.0938	0.00864	-3.34375	-15.8125	33.4688	11.875	22.75	-1.1875	-13.1875	-17.2188	1.71875	37.125	-4.4375	-30.1562		0.00864
0.00868	-7.59375	11.1875	-2.75	-15.5938	15.4688	7.75	20.5938	-18.5938	-7.78125	-23.1875	0.9375	19.8438	0.00868	-4.625	3.78125	0.8125	-1.5625	-6.21875	32.9375	-9.84375	2.40625	2.03125	-11.625	6.25	-24.625	18.375	-14.7812	4.9375	11.5938	-10	2.0625	16.5625	-16.7812	13.625	0.00866	-17.6875	13.625	-18.5312	-9.34375	-19.7812	24.6875	4.375	19	-7.625	-21.4688	-43.5312	15.5625		0.00866
0.0087	-16.375	-9.125	-23.4375	-24.5	-3.09375	4.1875	7.3125	9.5625	-20.5938	20.8438	-26.3438	-4.125	0.0087	3.9375	-26.2188	-5.875	-44.4375	1.0625	-38.3438	-28.6562	-14.4688	-10.7812	-18.3438	-18.7812	-16.6562	1.28125	10.9375	10.25	-14.6562	-20.25	-11.0938	18.1562	30.2188	-6.59375	0.00868	-16.75	12.5625	-25.1875	-15.0312	-19.0625	-29.5625	-11.6562	12.875	19.4688	12.7188	-3.75	-6.75		0.00868
0.00872	5.78125	6.65625	23.375	36.875	12.8125	1.59375	-21.4375	-29.5	40.9688	-19.6562	3.34375	-39.125	0.00872	31.4062	-18.0312	5.28125	-6.09375	-2.4375	-21.6562	1.875	-27.2188	-0.34375	-7.4375	-10.8125	14.6875	8.96875	-4.0625	-17.0625	-3.46875	2.21875	36.7812	-46.7812	-5.1875	-1.90625	0.0087	17.9688	-33.6562	-5.25	-2.4375	-13.1875	-19.375	-4.5	0.4375	-7.90625	-0.46875	-12.4375	-19.3438		0.0087
0.00874	-12.4688	14.6562	9.4375	0.71875	-16.4062	27.9688	-4.40625	-34.375	4.8125	-3.90625	12.4375	22.1562	0.00874	-18.25	4.46875	-3.625	4.65625	-17.6875	26.4688	-1.78125	-3.9375	20.25	-12.5625	-19.1562	15.8125	2.53125	-18.3438	-16.0938	-4.59375	-32.9062	-1.1875	27.375	-21.8438	16.2188	0.00872	14.2812	-19.5625	-7.34375	5.40625	12.0938	19.4688	0.59375	-12.5	-7	-18.75	-10.1875	33.6875		0.00872
0.00876	-1	5.125	-30.6875	-9.28125	-13.5	-5.96875	15.3438	11.9062	-0.96875	35.0938	-62.625	30.2812	0.00876	-9.25	-23.4375	-23.6562	-17	-2.6875	-9.625	6.78125	12.1562	-22.625	3.375	-1.1875	-21.75	2.4375	14.2188	34.2812	-4.21875	-9.40625	-16.7188	33.0625	17.75	-33.5	0.00874	-26	17.875	1.8125	-31.2812	-12.75	-8.96875	-26.4375	15.5625	-0.25	-17.3125	15.375	12.875		0.00874
0.00878	-14.75	-14.6875	9.96875	-5.5	29.8125	2.625	-25.625	-7.25	-0.34375	-15.1562	-5.21875	-27.0625	0.00878	14.25	-15.6875	22.2188	-0.21875	-9.15625	28.0625	-1.125	3.03125	-19.3125	-2.21875	16.9062	27.7812	-12.5	9.46875	2.28125	-14.7812	8.3125	-14.375	-46.0625	23	-9.84375	0.00876	-3.375	-11.25	18.7188	21.75	-6.90625	-8	-21.75	-15.0625	7.09375	-14.9688	8.25	-29.2188		0.00876
0.0088	17.5	17.6562	-11.6562	-10.0938	23.8125	12.9062	-4.90625	-4.8125	-16	-13.0625	29.8438	-17.7188	0.0088	-21.2812	-19.3125	-12.4062	3.6875	-22.2812	27.7812	9.90625	21.4688	4.84375	-11.7188	-6.1875	14.75	-21.2188	-5.84375	-17.6562	-5.46875	-17.6562	19.0625	-32.6562	-13.7812	35.3438	0.00878	14.1562	-5.53125	-16.9062	3.5625	20.4062	16.2812	12.7812	-11.9375	-22.25	-25.7188	-11.8438	3.5625		0.00878
0.00882	18.8125	-18.9062	-47.8125	-24.9688	-35	10.125	17.4688	20.9688	-11.3438	22.7812	-27.1875	35.75	0.00882	-7.625	-14.25	-3	-11.1562	36.8438	18.3125	13.0625	-46.6875	-24.1562	9.59375	34.4062	-42.0312	19.9062	-14.5	9	2.75	-13.5625	-17.75	55.5	19.0938	-1.03125	0.0088	-20.4688	21.125	-17.4375	-38.2812	-25.4375	-4.65625	7.28125	13.1562	17.875	-1.625	-13.75	0.375		0.0088
0.00884	-22	-6.625	-10.3125	30.1875	12	-4.75	-10.125	-9.59375	13.75	8.40625	6.21875	-36.7188	0.00884	34.4688	19.875	-2.875	7.4375	-5.625	-8.25	-1.40625	-21.7812	-22.6562	-3.6875	-13.8438	2.21875	-20.0938	3.875	-0.0625	7.5625	-2.71875	-12.2188	-5.6875	14.5312	-41.0625	0.00882	-21.5938	-26.8125	37.9375	10.4375	-13.2812	-18.1875	-26.8438	-35.9062	-11.125	37.4375	-3.375	-22.25		0.00882
0.00886	-0.8125	10.1875	17.3125	-20.25	6.53125	7.1875	-4.125	-0.375	-16.3125	-9.125	3.78125	-12.1875	0.00886	-9.3125	14.4062	-5.25	9.40625	-19.9062	37.25	11.9688	5.0625	30.9688	-12.3125	-17.6562	-3.84375	0.15625	-27.5312	-32.5	-22.0312	12.7812	18.8438	-35.5	-46.25	4.90625	0.00884	13.375	-32.7188	-6.625	21.9062	20.5312	4.5625	12.2812	-1.5625	-22.625	-14.5938	10.6875	-4.9375		0.00884
0.00888	-15.8125	0.78125	-14.25	-21.4688	-24.125	21.6875	8.0625	16.5625	-6.90625	-2.09375	-14.4375	49.125	0.00888	-10.7812	-8.53125	3.21875	-40.4688	-1.65625	15.9688	4.71875	-8.90625	-7.1875	-25.0625	24.2188	-27.2188	4.25	-3.4375	25.0312	-1.46875	6.25	-33.8125	27.25	-20.4688	-9.53125	0.00886	-2.5	6.875	-18.5938	-14.7188	-18	16.0625	13.9062	10.875	-0.65625	-11.4062	8.3125	10.4375		0.00886
0.0089	-51.6562	-25.5312	21.3125	17.0312	-2.9375	-28.8125	7.5	-4.1875	7.28125	13.4062	-9.65625	-9.3125	0.0089	18.4062	6.0625	-9.375	14.4688	-7.78125	0.0625	-34.5938	8.96875	-40.5312	-6.625	-1.40625	-5.71875	-34.75	20.875	-9.34375	13.9688	9.75	-1.6875	-8	37.7812	-36.9688	0.00888	-9.59375	39.0625	8.09375	-33.8438	-15.6562	-28.7188	-29.625	23.8125	10.1562	-9.5	23.7812	11.625		0.00888
0.00892	-14.9062	-8.90625	72.4688	-9.78125	14.2812	0.28125	-13.25	5.5	12.375	-23.7812	4.65625	-45.5625	0.00892	-31.125	4.5625	-24.6562	15.9688	-15.75	3.34375	15.0625	2.90625	24.1562	-22.4062	-20.8438	-2.1875	-7.90625	-6.4375	-31.8438	-1.21875	5.1875	-10.8125	-15.75	-38.3125	-9.3125	0.0089	-19.2188	-5.9375	-2.375	7.96875	12.5312	8.0625	13.5938	-31.3125	-10.125	-20.8438	-36.4688	2.78125		0.0089
0.00894	20.4062	11.0312	8.21875	-16.2188	-34.9062	-23.4688	3.21875	0.03125	19.4375	-7.75	-11.8125	41.7188	0.00894	-34.4062	0.4375	-7.71875	-1.28125	-10.1875	-30.0312	-0.65625	-14.7812	17.3438	-38.25	3.4375	-13.4062	9.21875	-19.9375	14.125	-19.0938	-1.46875	3.6875	4.25	-17.25	11.625	0.00892	-18.375	-13.4688	-3.15625	-18.875	-3.6875	21.2188	-0.46875	19.6875	28.6875	-10.5625	-11.625	2.65625		0.00892
0.00896	-6.03125	-37.1562	-12.875	8.78125	-18.6562	-15.7812	5.59375	0.28125	-13.1875	-5.6875	-24.0312	-33.8125	0.00896	4.28125	5.375	-11.7188	-12.7812	16.5312	-17.2812	-6.1875	16.8125	-39.5	12.4375	-12.4062	21.2812	-10.625	1.15625	2.21875	1.46875	20.6562	-21.0312	-8.75	31.25	0.0625	0.00894	10.9062	5.65625	34.4062	-18.1562	12.25	-36.0312	-17	10.5938	-20.9688	-0.90625	24.6875	-24.625		0.00894
0.00898	-16.4062	-8.71875	25.5312	4.9375	50.4688	-2.5625	7.5625	-12.5625	-1.25	-10.7812	17	-24.125	0.00898	-34.0625	12.4375	14.0312	-13.0312	-17.4688	-2.25	8.9375	4.46875	-17.875	-11.8438	-32.75	18.7812	-19.125	10.1562	-23.3125	-17.375	22.5312	-10.875	-19.4375	-22.125	28.2188	0.00896	15.875	-25.5	-35.625	-0.75	7.125	0.71875	-11.375	-38.5625	-20.6875	-22.1875	-16.8438	-19.3438		0.00896
0.009	24.375	21.4688	-20.0625	15.2188	-13.9375	7.96875	-19.2812	13.6875	-8.71875	-35.2812	-46.4688	9.25	0.009	-17.1562	8.625	-14.875	-12.9688	-7.40625	-7.65625	30.9375	-25.625	14.0312	-27.9375	-16.9062	-33.8125	39.625	-17.75	11.5938	-8.90625	9.125	6.09375	4.4375	-28.0625	31.0312	0.00898	-0.78125	-9.875	-11.8125	-30.625	-9.78125	-9.4375	13.6875	5.84375	-11.4375	-1.8125	-19	-19.0312		0.00898
0.00902	-0.5	-17.2812	-45.3438	0.8125	-26.25	-5.5	-7.65625	-16.25	19.7812	-9.8125	11.9688	-3.65625	0.00902	13.2812	-7.65625	2.53125	-2.09375	-16.25	-11.7188	-28.7812	-14.5312	-4.09375	10.9688	13.4375	2.53125	-13.125	15.9688	18.9062	44.5312	-10.625	-19.0938	6.96875	1.09375	-0.5	0.009	-26.4375	29.5938	22.7812	1.21875	-4.625	-28.0625	12.1875	3.84375	13.5	37.5938	37.0625	-9.59375		0.009
0.00904	-32.3125	-25.8125	25.3438	-2.21875	-0.875	12.5625	9.65625	-49.2812	17.5	22.5938	22.6562	-11.8438	0.00904	-12.9375	-15.875	-3.9375	2.75	2.84375	11.0625	-7.21875	11.5938	29.3438	17.0312	-43.9375	20.75	-7.28125	13.125	-24.6562	8.625	11.2812	-9.34375	-40.875	12.625	3.40625	0.00902	10.7188	-6.65625	13.2812	-0.625	17.0312	1.96875	-22.4688	3.75	-29.1875	0.40625	10.4688	-3.3125		0.00902
0.00906	-33.0625	1.5	2.375	-32.9062	-3.9375	-2.875	-14.0625	9.6875	8.5625	-9.09375	-5.25	5.59375	0.00906	-19.0312	-3.15625	11.0938	15.5312	9.25	-30.1562	-15.7188	-20.8125	25.1562	-27.2812	-3.0625	-34.0625	20.3125	-33.9688	-2	-12.6562	-0.9375	3.40625	18.9688	-39.2188	33.6562	0.00904	6.65625	-13.875	-14.75	5.625	-19.9062	20.7188	28.5938	-34.25	4.09375	-29.625	-39.2188	-2.8125		0.00904
0.00908	-7.09375	21.0625	-33	-28.375	-16.2188	-19.3125	-9.875	3.78125	-6.875	-5.78125	12.8125	20	0.00908	2.46875	-11.5312	-8.40625	-33.4062	18.4688	-38.375	-24.8438	3.15625	9.25	3.65625	-0.25	6.875	29.5	18.25	16.9062	35.6562	-34.4062	-2.875	9.40625	-3.96875	-13.375	0.00906	1.8125	-8.1875	17.5312	-8.6875	21.875	-20.4688	-12.4688	-11.9375	-5.3125	9.5625	24.9688	13.2188		0.00906
0.0091	-11.7812	-23.375	0.21875	-23.2188	35.6562	8.03125	19.7812	-9.96875	-10.5312	11.125	30.4375	-9.53125	0.0091	10.9062	-28.8438	19.2188	11.7188	-5.875	7.46875	-26.5	-8.21875	-3.21875	1.34375	-11.3438	24.75	2.4375	18.4688	-30.7812	22.0625	22.2812	-23.1562	-18	1.09375	-22.9375	0.00908	21.0312	12.0625	-17.0938	12.125	6	6.21875	-26.8125	23.7812	-18.5938	15.0625	33.5	11		0.00908
0.00912	-19.6562	-28.5	14.0312	-23.7812	2.40625	-4.25	2.65625	13.7812	8.65625	15.9062	10.7812	3.84375	0.00912	-20.625	-2	-28.0625	-28.3125	-19.5625	6.34375	4.4375	-23	9.28125	-45.5	-15.875	-19.0312	1.8125	-53.4375	-20.3438	-26.8438	15.1875	2.8125	-3.65625	-15.6875	28.9688	0.0091	-15.8125	20.3438	-18.4062	6.75	-32.3125	8.34375	1.875	1.03125	11.9062	-21.9375	-13.5312	21.125		0.0091
0.00914	5.6875	13.875	-21.3438	38.7812	-32	-4.5625	-40.3438	-4.40625	12.3125	-40.1875	15.6875	-17.5312	0.00914	19.9062	9.1875	-20.625	-15.5625	1.03125	-36.9062	5.3125	-14.875	32.3125	10.9375	6.375	6.1875	24.9688	-16.75	10.2812	33.5	4.28125	8.375	-2.75	-2.5	3.0625	0.00912	-39.375	-0.0625	-3.53125	-19.0312	11.5625	-13.125	-19.9062	-12.8125	-13.8125	1.5625	-9.78125	-15.3125		0.00912
0.00916	-17.875	20.5625	-32.0312	-8.71875	6.125	29.75	-18.125	-17.5	-4.75	-3.3125	42.125	-10.8125	0.00916	-5.40625	-24.1875	-26.7812	0.84375	16.3125	3.71875	-25.6562	-6.25	27.375	32.1875	-1.3125	22.3438	-28.2188	40.9688	-10.9688	1.53125	19.1875	-17.5312	-13.4688	0.71875	-33.6562	0.00914	16.625	-20.7188	9.78125	16.375	38.7188	-14.5	-13.5312	-0.3125	-12.0625	4.46875	21.25	0.75		0.00914
0.00918	33.8125	-38.4688	-2.625	-25.3438	-19.0625	-0.25	21.8125	20.4375	14.8125	20.9688	-31.4688	12.6875	0.00918	-32	7.0625	-9.84375	-2.15625	-20.2188	20.3125	-3	-13.6562	-1	3.59375	-18.5	-43.4375	-17.8438	-9.40625	-16.5	-26.5625	-18.5	-7.53125	-10.5625	-20.7812	6.9375	0.00916	-14.125	8.4375	-24.9688	8.15625	-35.5625	2.59375	29.5	4.75	14.0312	9.84375	-9.4375	2.3125		0.00916
0.0092	4.96875	-20.4688	-26.625	8.40625	14.6875	-9.96875	-39.25	2.8125	9.28125	-5.1875	8.5	2.28125	0.0092	40.2812	17.3125	-12.375	9.5625	-3.5625	-43.0312	8.34375	-9.625	-1.8125	-2.1875	9.59375	-33.7188	25.9375	-43.0312	-7.0625	19.75	28.1875	27.25	-17.8438	4.9375	33.0938	0.00918	5.65625	23.0312	9.6875	-24.9062	2.15625	-19.9375	-5.71875	-5.84375	29.9688	-3.40625	-34.5938	-18.8125		0.00918
0.00922	-19.625	35.2188	-7.375	20.3125	30.9062	-28.9688	-27.4375	-8.875	-4.5625	-21.9375	43.5312	-14.1562	0.00922	21.375	-19.3125	-9.5	-7.78125	0.71875	-12.875	-14.3125	12.2188	-14.0312	-23.9062	-13.5938	44.625	-5.96875	-14.4062	8.46875	4.46875	-1.4375	-2	-1	49.375	-28.6875	0.0092	11.8438	-10.1875	6.625	5.34375	36.7188	18.6562	-14.5938	10.9062	-8.1875	-12.6562	-17.9375	-26.6562		0.0092
0.00924	11.625	2.1875	-14.7812	14.6875	-5	20.0938	51.1562	-19.5312	-20.6875	19.5625	-43.75	-4.375	0.00924	-30.4062	18.1562	15.4688	-32.8438	-13.3438	37.3438	8.0625	-11.1875	17.6875	-30.75	1.4375	2.4375	-14.5	9.34375	-19.4688	-20.7812	-35.7188	-22.5312	-2	-20.75	-5.03125	0.00922	6.84375	-33.2188	-16.2812	-6.5	-12.7812	25.4688	30.4062	28.875	-6.28125	-19.7812	38.3125	-23.9688		0.00922
0.00926	14.9062	12.375	-19.3125	-39.7188	23.9062	-29.625	5.625	-0.78125	12.8125	-13.7812	-27.6562	4.8125	0.00926	-11.1875	-42.0625	-18.5	10.75	-26.5	-7.46875	-1.1875	-3.125	-24.3125	4.1875	-12.8438	-23.9375	2.34375	-14.5938	10.9062	-3.40625	-32.2812	6.8125	6.15625	-5.4375	13.9375	0.00924	-32.7812	-21.5938	-8.75	-17.8125	-27.0938	-27	-15	-1.90625	9.84375	-33.4688	-23.125	3.78125		0.00924
0.00928	-46.3438	8.03125	2.65625	17.1562	16.75	-12.75	3.6875	-8.625	-9.21875	10.75	50.0625	-37.7812	0.00928	-13	-4.59375	9.40625	0.34375	-19.8438	12.3125	4.65625	40.375	7.5	33.7188	-5.53125	20.0938	17.5938	33.5938	12.1562	12.875	-34.1562	-9.6875	31.9688	27.5312	-24.9062	0.00926	7.1875	27.0938	-11.9375	14	20.7188	19.8438	-25.5625	1.59375	7.53125	9.40625	-29.4375	-14.5		0.00926
0.0093	-4.125	-20.7812	-6.21875	0.03125	26.4688	45.1562	7.6875	-8.5625	6.15625	26.3125	-38.0312	6.28125	0.0093	-26	1.96875	38.1875	-36.8438	13.125	39.0938	-4.8125	-5.71875	-11.0312	-2.46875	-16.4062	-14.0938	-16.2188	-12.9375	0.1875	-10.5938	-4.25	13.0938	12.375	-4.71875	-16.125	0.00928	5.21875	-31.0625	-30	1.21875	3.90625	26.3125	15.4688	-15.8438	-14.875	-3.5625	16.4375	12.375		0.00928
0.00932	28.375	-7	-40.4062	-23.3125	-10.7812	22.9062	6.03125	29.9375	12.1562	1.375	-24.4688	-21.3125	0.00932	26.0938	5.8125	5.15625	26.8438	-14.5	-78.25	28.5312	-29.3125	-29.25	-30.5312	-1.5625	-16.25	21.9062	-27.5312	13.3125	-7.09375	-16.6562	9.5	-5.15625	-9.78125	12.7188	0.0093	-16.5312	7.8125	10.9062	-32	0.84375	-20.1562	-7.15625	-32.2812	2.84375	13.875	-4.875	3		0.0093
0.00934	-29.75	17.5625	25.3438	-17.125	-1.9375	-40.5625	-27.2812	-4.5625	-8	-23.9062	25.9688	-12.5	0.00934	-15.375	3.3125	10.7812	23.5625	-4.6875	-18.0625	9.96875	9.21875	-23.0312	-21.6562	4.40625	13.375	-43.4688	19.9375	-20.9062	14.9062	13.5625	-11.75	15.9688	-9.71875	9.90625	0.00932	-2.90625	5.375	13.5625	-13.375	38.0938	-17.125	-16.375	-0.5	-9.25	-9.25	-2.25	14.4062		0.00932
0.00936	-14.9688	-19.7812	1.40625	0.09375	-22.3125	29.875	-18.7812	-8.8125	-32.3438	7.21875	1.625	14.0312	0.00936	-29.3438	3.96875	17.7812	-2.65625	8.09375	56.25	-18.625	5.59375	-4.28125	-6.09375	16	2.09375	-24	-5.78125	20.4062	-31.5	3.59375	-32.5	12.6875	-10.0312	-58.4688	0.00934	-17.875	-1.71875	-0.46875	17.875	-46.5938	21.7812	13.1562	5.53125	-2.90625	-13.8125	9.09375	9.21875		0.00934
0.00938	52.5625	2.1875	-31.5	-6.03125	-3.625	30.1875	23.7812	4.1875	18.4062	12.5938	-22.5625	8.90625	0.00938	2.46875	-14.5	7.8125	24.3438	-33.9062	-7.875	-15.7812	-17.7812	-6.71875	9.78125	-0.3125	-26.25	11.1562	-22.4062	-27.0938	-17.4375	-4.21875	1.6875	-35.8125	3.09375	1.125	0.00936	15.4062	-13.4375	-11.6562	-22.7812	-26.8438	-22.125	-17.4375	-26.3125	-20.0938	-3.15625	-4.78125	11.4375		0.00936
0.0094	-11.4375	-8.625	-11.0625	-9.375	3.875	-35.9062	-3.84375	28	6.1875	0.46875	1.34375	-24.5312	0.0094	2.4375	-2.125	-31.1562	55.5	-8.8125	-27	-19.5	-8.25	-22.9062	-7.53125	2.8125	-1.9375	-8.15625	22.4375	-12.9062	-6.5	3.71875	5.40625	-5.625	2.96875	28.1875	0.00938	-17.9062	-10.3125	-8.375	-9.125	9.4375	-22.8438	-20.0938	13.3438	7.46875	-4.1875	-15.8125	-17		0.00938
0.00942	-6.28125	-27.125	6	-21.9062	-21.4375	-25.875	-11.0625	11.0312	-21	-36.9375	-8.8125	8	0.00942	-13.5938	45	-10.375	-3.71875	15.1562	6.03125	-23.75	9.21875	6.6875	-19.0625	-4.15625	10.5938	-14.0625	19.0625	-9.8125	5.96875	30.9062	-28.1562	19.625	11.5	-42.0938	0.0094	-12	-0.8125	-13.75	10.8438	-18.9375	32.2812	12.1875	3	-39.9062	-5.90625	-0.90625	-2.1875		0.0094
0.00944	-7.625	5.875	-53.1562	-26.2188	5.8125	10.1875	17.4062	-11.8125	2.03125	-8.96875	-45.25	24.5	0.00944	-10.5938	10.0938	39.5938	-17.7188	0.21875	-18.9062	3.09375	-34.4375	-16.1562	18.7188	-14.2812	-29.5625	-27.0625	-34.5312	-11.7812	-27.9688	-21.4688	-3.84375	27.375	-57.1875	-28.5312	0.00942	5.15625	-9.5	12.4688	13.5625	-20.3438	-33.7812	9.625	-24.6875	-16.1562	30.5	-8.3125	-8.46875		0.00942
0.00946	-40.6875	2.90625	-11.9062	9.9375	-14.625	-29.8125	7.3125	-22.25	4.65625	2.75	4.3125	-21.9375	0.00946	10.2188	-36.1562	-13.5625	43.0625	-15	-2.9375	-23.9062	5.15625	4.28125	-17	-4.46875	7.5625	-21.875	-10.8125	-23.4062	-20.8438	-9.09375	22.375	5.875	-6.0625	9.125	0.00944	7.96875	-13.7812	35.6562	2.34375	29.0312	-44.3438	-6.0625	7.15625	10.4062	-2.21875	16.4688	-16.3125		0.00944
0.00948	-14.0938	-14.125	48.5625	11.1875	-10.7812	-0.09375	-15.375	-26.4688	-34.25	-4.9375	-9	-10.25	0.00948	-36.1875	-1.03125	-10.875	13.6875	9.65625	36.5625	-14.9688	36.4375	9.96875	-15.375	13.2188	-8.0625	-15.0312	33.4062	-9.0625	12.75	16.8125	-19.4062	-12.0625	-2.15625	-16.0938	0.00946	-7.3125	22.0625	-31	0.96875	-2.65625	0.125	-2.5	17.0625	19.2188	-29.3438	-14.5938	-0.65625		0.00946
0.0095	18.4062	11.2188	-13.0312	-29.8125	-30.8125	-5.78125	-8.59375	-15.6875	22.5938	-29.5625	-3.25	32.9062	0.0095	-12.6875	4.5625	28.2812	14.2812	8.4375	-9.21875	-18.4375	-26.0312	1.84375	8.125	-42.5938	-15.125	-19.3438	-4.3125	15.5938	-27.9375	-20.6562	-17.5312	-13.1875	-29.5938	-30.9062	0.00948	-15.7188	2.84375	-22.8438	-14.9375	-46.7812	1.15625	9.5625	-9.21875	8.46875	13.0938	-35.125	4.6875		0.00948
0.00952	-23.0938	1.09375	13.2188	26.4688	-22.1562	-0.875	-14.3438	3.65625	19.9375	-12.2188	1.8125	-14.8125	0.00952	-0.84375	-34.7812	4.15625	11.2188	-5.9375	-58.1562	-2	-9	-14.7812	-14.4688	17.5	-12.5625	7.5625	20.1562	4.21875	-15.4688	-36.125	-15.5	-5.4375	-11.6875	7.5625	0.0095	11.5312	-5.0625	3.34375	4.5625	6.96875	-7.1875	8.46875	-2.4375	-16	-7.5625	-3.15625	-41.7188		0.0095
0.00954	9.46875	-23.6875	44.4375	-15	5.21875	-23.125	-12.5625	-13.4062	-23.5625	2.4375	0	-16	0.00954	-47.1875	-23.125	-15.9375	-7.46875	-4.0625	-9.96875	56.9688	13.1875	-6.5625	-8.4375	-2.03125	1.0625	-7.25	36.125	-13.5	31.3438	8.625	-12.4688	-44.5312	-9.34375	-4.1875	0.00952	-2.5	-1.28125	18.1562	-12.0938	-1.21875	9.53125	-12.375	27.0312	-9.8125	-2.1875	-2.09375	-14.7812		0.00952
0.00956	19.2812	4.71875	-42.1875	-15.5938	-26.0312	21.2188	-18.4062	-45.375	-15.5938	-28.1562	6.21875	37.5938	0.00956	-18.2812	9.71875	5.125	-25.2188	-36.9062	32.9688	18.6562	-5.40625	-0.46875	10.0312	-31.9688	6.25	12.9062	-8.71875	6.46875	-43.1562	-8.59375	-13	-19.25	6.78125	-4.40625	0.00954	-11.5312	2.75	-5.71875	-2.21875	-53.2188	0.875	-12.1875	-14.2812	-4.4375	-0.28125	-0.71875	-7.96875		0.00954
0.00958	-15.7812	-5.6875	-33.5	5.25	3.5	-6.03125	-28.7188	-41.4688	-11.0625	44.375	-23.25	-5.84375	0.00958	34.3125	-30.375	-2.46875	-32.5	-13.5938	-41.5	13	-27.0312	-0.96875	15.75	1.625	15.125	5.71875	-6.71875	-9.71875	-3.125	-38.2188	14.5	-2.25	-15.1562	4.1875	0.00956	-2.4375	-27.1562	-5.3125	13.0938	19.1875	-10.8438	10.0625	12.375	6.1875	21.5625	24.9062	11.7188		0.00956
0.0096	-28.375	-18.4688	26.9375	-19.2812	4.6875	-13.8438	-15.8438	35.6562	1.71875	-5.28125	8.3125	-27.5312	0.0096	34.3438	-0.28125	-24.6875	15.0938	-13.4688	-27.7812	-13.2188	-2.84375	4.46875	-13.4375	-12.0625	14.0938	-35.1875	15.8125	-18.75	49.4375	3.5	14.6875	-33.4375	6.15625	2.03125	0.00958	9.3125	4.875	-19.0938	41.1562	0.46875	-2.40625	3	3.5625	2.59375	-2.46875	-5.46875	6.375		0.00958
0.00962	-11.7812	26.0938	-22.1562	1.75	-12.625	6.71875	20.2188	-0.75	-68.2188	-18.0938	-8.5	5.875	0.00962	14.1875	1.6875	-12.0312	-31.25	-10.4688	16.4688	-19.4062	-7.21875	-2.90625	-8.25	0.1875	-14.0938	-3.8125	11.8125	19.125	-24.3125	-0.65625	-11.0312	3.125	-16.4062	7.34375	0.0096	-10.875	-26.0625	0.71875	-19.25	-22.4062	2.625	5.5	-6.78125	-33.0625	-9.96875	-29.25	-11.7188		0.0096
0.00964	19.0312	6.84375	-34.9062	34.7812	-10.8438	-1.0625	31.5625	-25.1875	-9.3125	-1.53125	14.9062	4.4375	0.00964	34.6875	-12.9688	-12.6562	-36.1562	42.4688	-19.0312	20.2188	-24	-17.3125	17.6562	7.5	-26.5312	-9.46875	-17.0312	-3.78125	-42.6562	-20.2812	26.9375	8.90625	-4.125	7.8125	0.00962	-0.90625	17.4375	-13.5625	-16.9688	-19.5312	-9.8125	26.0625	-13	31.375	14.5312	17.1875	2.9375		0.00962
0.00966	-48.625	-33.2188	4.09375	-24.4688	20.3438	19.5	-25.6875	12.5312	0.53125	10	-25.7812	-14.5	0.00966	27.1562	-10.3438	7.25	-25.5312	18.625	12.1562	0.125	8.96875	4.71875	-0.4375	-7.375	24.4375	-8	13.75	-45.5312	23.4375	25.375	6.09375	2.125	3.71875	-6.1875	0.00964	-11.7812	-18.7188	15.5312	2.84375	44.3125	4.46875	13.75	15.7812	-33.4375	1.40625	35	-10.8438		0.00964
0.00968	30.4375	8.90625	-6.5625	-24.9062	-11.2812	2.15625	-16	15.8125	-2.0625	-14.6875	-16.9688	35.875	0.00968	-16.5625	0.1875	-14.8125	6.25	-6.6875	12.0312	-18.75	-17.1562	-4.78125	0.125	6.875	6.28125	9.71875	-37.2188	15.8438	8.625	19.3438	-23.4062	-24.8438	6.03125	-3.46875	0.00966	-4.71875	4.375	-14.4375	-23.8125	-15.7812	22.6875	-30.9062	-13.2188	0.9375	-22.125	-56.3438	-9.875		0.00966
0.0097	17.0625	3.5625	-27.0938	30.2188	-47.0625	-23.9375	10.5312	1.25	-4.03125	46.2188	20.8125	-0.75	0.0097	40.7812	-20.1875	-16.3125	-17.5312	7.0625	-5.65625	-0.59375	3.09375	-1.625	5.78125	3.53125	-26.5	-6.65625	-6.8125	-0.71875	-46.875	-25.4062	4.9375	2.09375	-2.3125	0.71875	0.00968	42.375	-14.4375	33.0938	21.3438	1.40625	-30.6875	-24.8125	1.4375	1.5	14.5938	-10	33.125		0.00968
0.00972	-38.3125	-16.2188	14.75	-7.34375	36.4688	5.03125	-9	12.7812	29.8125	49.5	-22.625	1.21875	0.00972	-2.34375	-27.5938	10.4688	-10.25	39.7812	4.8125	-1.78125	-3.90625	7.9375	-10.0938	-19.0938	-8.09375	-7.1875	-5	-31.0312	14.6875	-8.875	2.21875	-3.96875	-23.3125	-27.5625	0.0097	9.0625	-2.03125	-32.8125	8.1875	26.6875	14.5938	4.40625	-20	3.59375	-2.71875	16.9375	21.3125		0.0097
0.00974	14.2812	-12.375	-1.0625	11.9062	-0.71875	-8.625	24.4688	26.5625	28.0312	-42.125	-31.9062	23.375	0.00974	-31.5312	27.1562	-6.5625	10.4688	5.65625	8.34375	9.3125	-5.25	13.7812	-27.5312	-18	6.4375	-6.40625	-6.21875	18.4688	15.6562	7.65625	-7.28125	3.8125	21.375	-14.9375	0.00972	4.21875	8.75	6.59375	-38.5625	-18.25	3.0625	-3.625	-7.65625	18.6562	-21.9062	-39.375	-15.8125		0.00972
0.00976	14.75	20.5	-27.25	-1.96875	-16.5625	-2.40625	-28.125	24.0312	-16.375	-25.6562	-20.5312	15.9375	0.00976	6.46875	-10.875	-23.3125	-13.25	-3.8125	-14.4688	0.4375	10.9375	-38.7812	-16.0938	19.25	-2.15625	1.90625	-17.9062	21.1562	-40.1562	-23.125	2	-22.6562	5.15625	-18.875	0.00974	-7.75	-2.15625	-11.7188	-16.4688	-33.5	-21.4375	3.34375	6.9375	-15.4375	1.875	9.9375	-41.8438		0.00974
0.00978	-12.4375	5.0625	-12.4375	-13.4375	-3.71875	5.84375	-9.71875	-4.09375	-13.6562	21.6875	-3.8125	10.6562	0.00978	-15.875	2.1875	1.53125	6.25	-0.46875	-10.9375	-13.0938	6.5	-8.21875	2.125	-20.8125	30.9062	-5.78125	8.15625	-10.25	-14.9375	0.03125	9.9375	-5.5625	-5.71875	-7.65625	0.00976	-12.1562	11.75	-24.0312	-2.53125	-7.28125	2.53125	-9.125	16.5938	26.4375	6.21875	-0.625	43.75		0.00976
0.0098	-5	-11.125	-8.96875	-7.46875	11.3125	8.09375	20.6562	19.6875	-7.875	-39.3125	-23.4375	12.0312	0.0098	4.65625	8.1875	6.9375	12.3125	-21.4062	43.7188	-5.34375	-13.0625	20.5	-25.9062	-12.8438	-8.53125	-21.5625	0.3125	-20.0938	15.5	8.84375	-12.9375	-15.9688	-5.15625	-7.25	0.00978	-20.5625	-11	17.8438	4.375	-11.7188	3.15625	8.1875	-31.2188	-14.1562	-20.6875	-5.625	-1.65625		0.00978
0.00982	23.3438	14.0312	-5.15625	-3.34375	-15.625	-13.25	-0.75	1.8125	10.75	-22.2812	-34	-35.7812	0.00982	-0.15625	-22.7188	-26.125	7.03125	-4.9375	-21.125	23.2188	-19.9688	-18.375	-2	30.6875	24.2188	26.0625	-47.6875	14.7188	-17.2188	-7.21875	-42.625	-21	2.84375	-13.5312	0.0098	-26.0938	18.3438	2.875	-20.0938	-12.8125	-11.2812	2.96875	-18.7812	0	-4.59375	-12.0312	-22.9375		0.0098
0.00984	-12.9062	-33.5625	-18.9688	-7.40625	-17.8125	-28.1562	0.1875	3.9375	-5.78125	1.28125	20.2188	-29.9062	0.00984	-10.9375	-2.875	9.09375	-22.25	-4.6875	-19.4375	-28.5625	-5	-32.125	21.7188	-10.3438	10.8125	-28	11.0312	2.625	-3.34375	-15.6875	-12	25.5312	36.25	2.625	0.00982	-4.5	1.53125	-41.25	24.3438	29.5312	8.875	-30.8438	7.34375	-9.875	14.75	16.0938	13.2188		0.00982
0.00986	-22.1875	-15.9062	-16.4062	-24.9375	-9.8125	18.9375	20.5625	12.7188	-35.125	4.09375	-8.53125	27.9375	0.00986	8.0625	29.375	-7.84375	-11.5	-2.90625	13.5	-7.0625	4.8125	-6.5625	-11.0938	-17.75	-2.84375	-25.2188	-1.65625	9.4375	29.5625	20.875	-6.9375	7.875	-17.7188	17.9688	0.00984	12.0312	-14.4062	-15.875	4.59375	-0.21875	27.4062	7.96875	-23.0938	-6.59375	-17.8438	-5.625	-1.78125		0.00984
0.00988	-20.25	23.9375	-32.6875	-7.5625	-12.375	-11.5312	7.84375	-30.625	18.5625	-12.4062	-3.75	15.9062	0.00988	-19.875	-18.75	-19.875	0.3125	12.4375	-14.25	26.6875	0.375	0	7.53125	12.6562	21.6562	31.5	-36.5938	21.2188	-23	-1.53125	-24.5938	-6.875	-29.375	-18.25	0.00986	-6.15625	-24.8438	26.8125	-34.6875	4.625	-25.4375	-7.5	6.9375	31.3125	-19.4688	-22	3.625		0.00986
0.0099	-21	-14.875	12.6562	-26.5625	-2.875	-4.8125	-7	-11.0938	-0.3125	-4.6875	21.0625	7.34375	0.0099	-18.8438	-18	-17.7812	-7.59375	10.4062	-16.25	-28.5	-12.3125	-35.4688	-7.6875	19.3438	2.96875	4.6875	-13.9062	-12.875	-24.3438	0.21875	12.875	-6.25	30.3438	-18.9688	0.00988	-27.9688	-8.90625	-19.4688	-16.7812	-16.2188	-18.0312	-9.25	7.5625	-27.9062	-16.5	11.875	5.09375		0.00988
0.00992	-13	-7.34375	0.0625	-28.4062	1.3125	0.53125	-18.7812	9.1875	-19.4688	25.5938	-13.7812	-2	0.00992	6.375	23.8125	2.375	-7.4375	-2.78125	25.3438	-25.5312	7	-4.78125	0.6875	-1.78125	-9.25	-26.7188	-0.46875	2.0625	-26.875	21.875	12.75	-2.59375	6.28125	-8.59375	0.0099	3.34375	13.0625	32.3125	35.5312	-17.5312	32.5938	-16	-44.9688	-20.3438	25.0312	-13.25	-24.9688		0.0099
0.00994	28.3125	-14.8438	-6.96875	8.3125	-23.4375	-6.1875	14.625	-5.0625	21.4688	-3.65625	-20.8438	7.5625	0.00994	-3.65625	5.96875	-9.96875	24.2812	-10.375	-41.75	5.59375	-12.9062	14.0625	-29.5312	-0.4375	-16.2812	-7.21875	4.3125	-7.96875	6.34375	-20.375	-17.4375	-4.09375	-22.5	-12.7188	0.00992	15.375	-12.8438	50.625	8.125	0.59375	-15.2812	-1	-36.5	-8	-9.25	10.2188	-6.5625		0.00992
0.00996	-21.9062	-22.8125	-14.5312	-9.6875	-5.65625	-46.3438	-24.2812	-37.1875	-22.1562	-10.0312	-19.3438	-3.90625	0.00996	-38.9062	-24.4062	-34.9375	-6.75	10.375	-11.0625	-6.3125	-4.125	-17.9375	2.6875	45.5938	13.4062	19.75	0.5625	-28.1562	-1.21875	-33.4375	-17	-33.6562	-10.1562	-15.5312	0.00994	-28.9688	9.46875	-9.4375	-34.875	1.46875	-27.9375	-9.8125	15.5625	-9.375	20.6562	4.59375	10.0938		0.00994
0.00998	-5	-28.0625	-17.0625	-11.125	-44.125	3.75	12.875	-4.40625	-1.125	-25.1875	-18.3125	-1	0.00998	-28.6562	8.15625	20.4375	-3.21875	1.59375	24.5625	-35.7188	2.78125	16.5938	-10.9062	-37.1875	8.28125	-55.7188	-5.34375	-31.1875	-1	11.0938	21.5	9.15625	-40.6875	-6.09375	0.00996	-11.2812	7.8125	-6.90625	-16.25	-7.375	-23.125	5.71875	-20.2812	-32.7812	-2.125	-6.78125	-25.375		0.00996
0.01	5.46875	4.84375	4.6875	-10.375	-24.9688	31.5938	-7.5	-11.8438	14.2188	-10.75	-2.84375	-4.28125	0.01	18.0938	24.0625	-2.59375	-1.46875	-29.5625	-28.9375	-9.78125	-17.2812	7.84375	-3.8125	-40.4062	-32.5312	-19.1562	-32.4375	13.9375	14.3438	-1.1875	-6.96875	18.3438	-3.1875	-1.21875	0.00998	-6.125	-22.2188	35.875	25.25	20.0938	-15.7812	16.875	17.875	11.75	-19.5312	-19.2812	7.90625		0.00998
0.01002	-38.0312	-3.5	7.3125	3.875	-16.4688	-15.7812	-12.7812	-21.9062	17.875	-30.6875	0.3125	-12.6562	0.01002	-28.8125	-25.0938	-14.7812	-6.4375	16.625	-26.2812	-26.1562	-10.8125	-6.09375	-11.5625	-2.09375	-8.5	14.0625	-4.78125	-15.6562	-4.6875	8.59375	-12.9062	-34.1875	-22.9688	-15.5938	0.01	13.9688	21.1562	5.15625	0.25	-17.3438	-5.375	-28.2812	5.9375	16.1562	-16.8438	17.9062	1.71875		0.01
0.01004	-2.1875	-2.5625	5.03125	14.375	-7.46875	7.0625	-32.5	-0.75	-34.2188	-11.4688	-17.9062	-0.09375	0.01004	-21.1562	-7.0625	-24.9688	-13.4375	-9.875	29.2188	-0.65625	-20.375	6.96875	-3.625	-33.4688	11.1875	-10.375	24.0312	-39.7188	-24.625	-13.0312	-1.15625	-22.6562	-7.0625	0.46875	0.01002	11	12.6562	-18.5	5.03125	-31.375	17.5	-7.0625	20.5625	-29.3438	-10.1562	-8.1875	-10.3125		0.01002
0.01006	11.4062	19.4688	-40.9375	0.96875	32.5938	36.6562	-4.9375	-46.2188	2.5	15.3125	16.3125	19.1875	0.01006	-0.875	-5	15.6562	14	-47.7188	-7.34375	-2.9375	-37.9062	6.96875	5.875	-20.125	-1.875	-3.96875	-31.2812	20.6562	-19	17.125	-25.375	-5.90625	-14.75	22.9375	0.01004	-18.9375	2.875	9.1875	-6.375	5.3125	-10.875	3.375	-15.4062	14.1562	-1.46875	5.5625	-16.3438		0.01004
0.01008	-11.2188	-4.875	20.4062	3.1875	-3.625	-15.5	-34.3125	9.34375	41.4062	7.625	-1.21875	1.40625	0.01008	7.03125	-47.5938	-0.34375	-28.0625	-27.9375	-48.3125	-19.625	-3.96875	-3.1875	15.6562	21.5312	6.8125	22.4062	-20.1875	14.3125	8.6875	-31.8438	-19.9062	-27.2188	4.59375	11.75	0.01006	16.3125	19.625	-12.9375	3.03125	35.4375	-18.7188	-11	-3.1875	3.3125	-5.90625	-0.5	0.1875		0.01006
0.0101	-6.1875	-5.1875	26.875	-17.4062	1.4375	21.5938	-24.5312	-22.9688	-40.6562	5.65625	-3.03125	-13.9375	0.0101	0.78125	-14.25	-0.4375	-16	17.5625	-0.96875	-24.7812	20.0625	-3.3125	23	-5.28125	1.09375	-15.7188	34.1562	-3.15625	12.8125	-32.4062	-15.3438	-19.3438	16.625	-29.0625	0.01008	12.1875	20.5625	-24.0312	-5.28125	-17.5938	25.5312	21.3125	5.40625	-25.0625	3.3125	-31	-6.90625		0.01008
0.01012	25.6562	-11.0938	-54.5625	-17.4062	4.125	13.6562	20.4375	-33.3125	-29.8438	-20.8125	1.96875	-33.2812	0.01012	-15.9375	-1.125	-4	-8.40625	-20.0938	-8.25	-13.8125	-18.4375	4.1875	-15.9688	-20.625	-28.7812	-23.3438	-5.21875	-7.5	12.5	-3.8125	29.4062	4.1875	-26.2812	20	0.0101	-15.875	-8.875	7	-10.0312	-5.0625	-1.4375	19.8438	-14.375	8.5625	-1.3125	-16.5625	-5.03125		0.0101
0.01014	-32.25	1.21875	-17.4375	14.0312	-17.7812	1.53125	5.25	7.21875	18.9062	1.8125	-9.75	-40.3438	0.01014	-7.90625	-32.875	-16	-18	-11.125	-12.0938	20.7812	15.2188	8.15625	13.6562	9.875	9.34375	-2.15625	-20.7812	-0.9375	-19.0625	-26.375	3.15625	-11.75	-18	21.0312	0.01012	-6.71875	-1.6875	-13.4062	6.21875	10.2812	-5.28125	-14.9375	-3.46875	9.15625	1.3125	19.4375	20.0625		0.01012
0.01016	-41.875	5.96875	4.15625	-6.34375	2.9375	-8	-13.75	-3.15625	-30.9062	-0.40625	-18.5938	-15.5312	0.01016	-10.4375	-11.375	30.9688	-25.375	2.8125	24.6562	-15.8438	22.25	-23.3438	11.25	31.5625	-1.15625	13.0625	-2	-10.2188	-1.78125	-7.6875	-1.53125	1.21875	9.78125	-22.9062	0.01014	31	-20.7188	-4.8125	19.1875	-9.1875	42.875	-14.25	4.6875	-19.1875	8.09375	7.59375	5.40625		0.01014
0.01018	11	3.96875	-17.625	-21.1875	1.65625	21.25	10.6875	-15.0625	9.65625	-9.59375	20.625	3.40625	0.01018	-11.7188	6.5625	9.75	-3.25	-10.3125	12.75	2.4375	-48.875	-15.9062	-8.5625	-16.625	-9.90625	17.75	12.5625	-13.625	8.78125	-4.625	5.8125	-3.90625	15.5312	12.125	0.01016	-20	-2	-6.40625	-12.4375	-4.03125	-33.4688	-22.8438	-31.6875	-9.40625	4.65625	-16.0312	-25.2188		0.01016
0.0102	24.125	8.09375	-29.4688	-18.5312	8.6875	0.96875	-19.5312	-3.875	23.625	21.5625	-6	9.1875	0.0102	41.125	-14.625	-22.7812	-8.21875	-15.625	-24.3438	33.9688	4.21875	2.21875	-7.40625	-8.59375	-24.8125	12.1875	-24.9375	-0.46875	-25.2188	18.0625	-6.03125	-13.2188	9.5625	5.3125	0.01018	-14.1562	6.3125	-31.0938	2.5625	-8.4375	-30.1562	-5.90625	-7.5625	12.4062	-6.9375	-12.0625	32.9375		0.01018
0.01022	-31.25	-25.2812	5.5625	-8.28125	-7.28125	-5.5	8.59375	21.8438	-32.375	12.875	-30.25	-15.8438	0.01022	-22.5312	-6.25	-10	-7.96875	-11.0625	23.7188	-41.1562	35.5938	-9.6875	-29.5312	-5.6875	17.375	-19.0938	11.625	-13.5312	11.6562	1.90625	-11.5938	5.4375	-18.5	-1.40625	0.0102	26.0312	-5.15625	29.0625	24.2188	5.375	25.2188	-14.5625	25.8438	11.8125	-24.7812	13.7812	-22.0312		0.0102
0.01024	13.625	-24.25	-24.7812	-18.3438	-15.0625	3.6875	16.7188	-4.5	-15.4375	-16.2812	-8.75	-20.9375	0.01024	-24.8125	38.0625	-5.71875	17.8438	-21.6562	25.9688	10.5938	-27.9688	-29	2.6875	-8.09375	-35.625	-11.1562	-12.875	5.78125	-3.5	13.4375	-20.4375	21.7188	11.5938	0.78125	0.01022	-16.1875	-9.875	-10.7188	-14.1562	-14.0625	-1.6875	-19.6875	-13.6875	3.75	-24.0625	-3.875	-8.375		0.01022
0.01026	32.5625	-5.34375	-25.0625	5.1875	-18.3125	-26.8438	-5.59375	-13.8125	46.5938	17.1875	1.15625	1.5625	0.01026	9.59375	-31.4062	-24.7812	21.7188	-11.4062	-28.875	9.0625	-26.7812	8.625	-2.9375	19.0312	-4.90625	8.0625	-39.125	6.59375	-1.96875	18.0312	-10.7812	-17.5312	-6.40625	3.09375	0.01024	6.8125	-24.4688	-26.4062	-2.78125	-9.15625	-10.375	-1.6875	-8.65625	5.6875	23.6562	-3.5625	-6.84375		0.01024
0.01028	-45.625	2.375	28.1875	-15.2812	-23.125	-16	-19.5	18.2812	-11.875	16.7188	-15.125	14.9375	0.01028	-17.1875	12.75	-13.3438	-7.875	-12	8.90625	-11.6562	41.4688	8.96875	-31.7812	12.375	10.3125	-1.09375	-12.0312	-34.4062	-27.3438	-12.5	26.625	-4.96875	-11.3438	-19.7812	0.01026	25.8125	12.125	1.375	6.125	2.78125	16.3438	27.625	26.2812	-8.96875	-8.375	-25.8125	-8.375		0.01026
0.0103	5.0625	5.15625	-26.4375	7.21875	-14.9375	-17.6562	28.9062	-11.3438	-52.625	-53.3438	10.4688	-10.8125	0.0103	-17.7188	34.625	6.53125	-27.6875	-6.875	38.0938	-18.3125	-13.8125	1.3125	4.34375	1.875	-42.9688	-14.0625	-10.6875	1.96875	3.75	-11.375	1.03125	13.625	9.9375	-15.75	0.01028	-5.90625	-1.625	5.0625	-35.1875	26.1562	-4.9375	-14.75	-0.5	4.3125	-13.9062	-34.7812	42.5938		0.01028
0.01032	11.875	-8.78125	-5.125	8.4375	8.0625	0.34375	8.125	-10.1875	3.03125	3.03125	-1.40625	-48.625	0.01032	-11.25	-32.3438	-12.5938	2.75	-16.375	-25.6875	0.84375	-20.375	-24.4062	-18.2812	-13.5312	-12.1875	-12.2188	-5.53125	-13.4688	-0.125	15.125	-2.34375	4.09375	0.4375	21.8125	0.0103	4.46875	-26.8438	-13.8125	-16.2812	-0.75	-53.0625	-5.21875	8.15625	-3.96875	-5.46875	22.625	-8.625		0.0103
0.01034	-11.6875	-5.28125	19.6562	-14.5312	17.625	-40	-24.875	-1.25	32.4688	26.3438	-48.625	-6.09375	0.01034	12.1875	17.5625	6.625	11.5312	0.3125	-5.625	-12.4062	21.6875	7.96875	-12.5938	-8.59375	3.59375	9.0625	10.9688	-4.5625	-19.1875	9.875	-8.15625	-22.1875	-4	-3.21875	0.01032	-0.65625	-5.8125	-13	9.65625	11.3125	26.25	24.4375	6.375	-9.125	0.0625	22.1875	-23.875		0.01032
0.01036	-10.0312	-17.4375	15.9688	-10.75	-15.375	1.96875	-6.40625	-1.15625	-11.75	-14.3125	-1.59375	3.84375	0.01036	-42.875	40.875	10.375	-8.15625	-4.9375	34.3125	-6.09375	-15.6875	2.59375	-16	-16.4375	-10.0625	-35.625	26.0625	42.6875	-5.78125	-13.625	1.0625	4.8125	-15.3125	-12.5	0.01034	-29.4688	-0.28125	6.34375	-16.375	-20.625	33.9688	0.65625	-14.25	19.7188	-26	-37	-27		0.01034
0.01038	-20.1875	10.6562	-0.375	5.5	-2.71875	-13	4.125	-27.375	2.09375	-45.7812	22.5	9.71875	0.01038	-34	-0.6875	7.46875	3	-30.6562	-45.25	20.9375	-5.6875	-10.4375	31.6562	-5.8125	-10.9062	11.875	-36.7188	31.0312	6.03125	-16.0938	-19.0625	8.625	2.40625	-10.9688	0.01036	-32.0312	-13.3438	-15.6562	-14.9688	-14.6875	-64.2188	-13.4375	-20.5938	5.8125	-35.375	2.0625	18.5		0.01036
0.0104	-21.4062	-30.0625	-31.7812	8.96875	-30.125	-36.5	2.15625	-14.0312	-9.375	3.5625	-32	-35.5625	0.0104	6.375	-8.59375	-33.3125	15.9688	15.6875	-10.8125	-11.0625	25.5625	-31.125	-9.125	-0.3125	0.96875	1.3125	6.03125	-3.3125	-2.8125	15.6875	-0.21875	-39.5	6.90625	14.3438	0.01038	15	-5.40625	21.75	20.4062	5.71875	-3.84375	23.6562	9.78125	-5.15625	22.5	15.625	-20.7188		0.01038
0.01042	-5.8125	-11.8125	26.7188	22.4375	-32.0312	-5.71875	-2.90625	0.46875	-33.6875	3	-10.5625	20.625	0.01042	-22.0312	47.375	24.25	-21.4688	7.71875	-6.78125	-4.84375	0.28125	-8.3125	-7.15625	-22.4688	17.4062	-19.2188	8.90625	20.1562	4.6875	-1.96875	-11.8125	5.46875	11.25	-28.6562	0.0104	-6.1875	-11.4062	0.40625	-20.3438	-3.21875	3.9375	-16	-38.7812	-3.53125	22.7812	-14.9062	-11.4375		0.0104
0.01044	-9.46875	6.4375	-24.1562	24.125	30.4375	-11.4375	7.96875	-19.875	-6.78125	-10.4062	31.5	13.3438	0.01044	-9.84375	-14.0938	26.7188	-11.5312	-0.375	-32.9062	-34.8125	-31.7812	-16.3125	9.96875	5.15625	-43.3438	-10.625	-10.9688	16.625	15.125	-7.53125	3.5625	48.6562	-13.3125	-2	0.01042	-8	-4.1875	-18.4062	-19.625	-5.75	28.0312	-16.3125	4.03125	-0.34375	10.125	30.375	32		0.01042
0.01046	-11.5312	-3.5625	-22.75	-20.75	10.2812	8.8125	-47.875	-11.9688	-15.9375	8.09375	-2.59375	7.3125	0.01046	3.75	-17.0938	-44.6562	0.65625	5.375	-21.1875	-28.2812	27.6562	23.0625	-12	14.5625	-22.4688	9.875	-5.09375	-28.5	-20.375	-12	6.78125	-27.3438	-7.5625	6.28125	0.01044	15.1875	4.4375	-26.8125	28.8125	-11.7812	-26.3125	-8.09375	35.5312	-21.5	16.6875	13.375	-18.3125		0.01044
0.01048	-14.3438	17.9062	-2.40625	-8.75	-40.1875	-34.9688	-2.375	1.90625	-10.6875	-4	5.21875	14.7188	0.01048	-6.03125	48.6562	12.2812	-1.78125	5.96875	27.5312	16.1875	-7.59375	8.46875	4.40625	-3.96875	6.34375	-0.78125	2.6875	-26.375	10.8125	-23.25	-0.53125	-34.2188	-23.9062	-36.25	0.01046	-15.125	13.2812	-2.625	3.28125	6.09375	-9.59375	-11.5625	-14.2188	-6.46875	-20	-19.25	-29.3125		0.01046
0.0105	9.84375	6.84375	-9.15625	49.5625	1.21875	-10	-3.0625	-6.125	4.21875	-33.875	20.8438	-1.6875	0.0105	0.25	-21.25	3.90625	-5.53125	0.71875	16.1562	9.0625	-43.5	2.9375	-6.40625	-0.71875	-2	-30.5	27	26.6875	1.90625	15.8438	-17.125	29.1875	-22.5	-8.25	0.01048	6.46875	1.875	15.5625	-0.3125	-16	10.8438	-9.03125	-30.6875	25.8438	-5.0625	-10.5625	45.0625		0.01048
0.01052	-12.6875	5.0625	-13.5625	-37.2812	10.7812	-14.0625	-40.2188	3.875	19.0938	-5.75	-15.625	22.125	0.01052	6.78125	-19.4688	11.4062	27.8438	0.34375	-27.4062	-25.7812	13.875	9.65625	-9.6875	23.7812	2.84375	11.3125	-10.125	-17.25	-24.0938	-0.21875	-8.8125	0.5	-13.0312	14.4375	0.0105	1.5625	-28.4375	-17.0938	5.9375	-14.7812	-13.7812	15.3438	34.25	-34.0312	-13.25	18.8125	1.75		0.0105
0.01054	10.6562	11.8438	7.5625	1.125	-15.0625	-4.1875	3.6875	16.0625	-4.5	6.90625	-25	3.4375	0.01054	3.21875	-5.84375	-29.7188	-9.0625	-3.625	9.90625	-29.25	-8.0625	-18.625	21.625	-10.1562	15.625	-11.125	-24.1875	-25.4688	-1	-13.875	0.3125	-29.8438	-33.5	-8.90625	0.01052	-24.7812	-5.5	14.4375	-20.7188	-10.5312	1.75	-1.09375	-26.4375	-17.5	20.8438	-31.6562	-39.3438		0.01052
0.01056	-0.59375	14.375	-8.78125	25.5312	-16.5	-14.0312	-2.9375	-56.0312	0.15625	7.625	15.7188	-10.7188	0.01056	0.9375	-13.875	-7.125	-16.1875	-16.625	-6.0625	-1.40625	-20.2812	7.75	5.71875	-16	27.8438	-20.9688	12.2188	5.8125	-13.0938	-10.375	0.96875	-2.125	-19	1.34375	0.01054	-15.9062	-10.1875	17.2188	12.2812	9.3125	14.0625	27.5625	-14.8438	27.0938	-5.53125	2.96875	-4.875		0.01054
0.01058	-7.6875	12.375	-18.0625	4.25	28.9062	-17.9375	-44.25	-25.4375	0.90625	14.5625	-5.4375	3.09375	0.01058	0.71875	-11.9062	3.0625	21.3125	1.25	-29.8125	-15.0312	-18.625	16.4688	-29.8125	11.1562	-39.5	-14.1562	-16.875	13.875	-22.375	27.2188	-10.4062	-34	-8.59375	1.1875	0.01056	23.1875	-7.9375	-31.0312	-11.2188	-12.9688	10.5625	1.125	30.3438	10.3438	-19.25	30.0312	-11.9688		0.01056
0.0106	32.2188	5.46875	-3.4375	-13.9688	2.125	32.6562	9.90625	10.8125	9.96875	2.46875	-23.5938	-13.5938	0.0106	23.5938	-2.625	5.5625	-2.8125	-15.9688	11.5312	-29.375	28.4688	-0.0625	4.34375	-17.4375	-27.1562	10.4688	-0.25	-31.7812	-20.7812	-17.8125	-5.28125	-52.0625	19.75	-17.9062	0.01058	-20.25	17.9375	-4.5	-34.5	6.03125	0.6875	-34.0625	-17.8438	-35.2812	6.9375	-13.5625	-46.25		0.01058
0.01062	-9.8125	21.625	-29	-14.7188	-25.3125	-3.53125	1.21875	-7.40625	22.6562	-7.875	0.09375	-38.2188	0.01062	-23.9375	4.46875	19.875	-58.0312	-49.0938	-12.0625	14.4688	-14.2812	0.8125	-0.65625	-12.7188	11.4688	-4.96875	-3.25	15.1562	6.75	-27.2188	9.15625	19.2188	-6.65625	-0.5625	0.0106	-25.5	-22.8438	10.7812	34.2188	2.6875	-9.6875	9.125	-11.625	-4.46875	-8.4375	-38.3438	11.0312		0.0106
0.01064	-34.5625	-2	-30.5	39.0938	12.2812	-18.9688	-24.2812	-11.4688	9.96875	-6.3125	-21.5938	-24.6875	0.01064	-16.2188	-48.3438	15.3438	-21.5312	-14.1875	-27.0938	9.875	-8.9375	-17.5312	6.3125	18.1875	-9.125	-1.90625	-10.6875	23.4375	15.1875	15.9688	9.8125	28.2188	-1.59375	-2.5	0.01062	15.8438	14.0625	-11.7812	4.53125	-16.5	3.65625	-8.4375	23.6875	-8.9375	0	20.7188	22.0312		0.01062
0.01066	18.875	-32.5	19.0312	-35.9688	5.25	14.7188	-10.75	8.9375	-45.0938	11.75	-10.125	16.6562	0.01066	40.5625	-21.25	-25.5312	-2.40625	-10.4375	-0.4375	-8.1875	16.25	2.96875	-11.1875	-1.84375	-14.9062	12.0625	-24.4688	-21.5312	-14.5625	8.5625	-13.9062	-38.1875	19.1562	-18.1875	0.01064	-21.2188	23.4688	-12.25	-0.75	-11.5312	-13.3438	6.03125	6.3125	3.4375	0.03125	11.3438	-8.59375		0.01064
0.01068	40.1562	23.1875	-5.4375	-33.5938	-14.4375	10.3125	30.4375	6.65625	3.3125	-12.4375	-15.75	-7.59375	0.01068	-34.2812	-31.7188	-21.9062	-0.34375	-1.03125	18.4062	19.9375	-32.6562	-8.84375	-18.75	-28.1562	6.6875	15	15.0938	-19.6875	18.7188	-28.8125	-11.125	26.1875	10.3125	12.9062	0.01066	17.0938	-16.0625	5.78125	-9.4375	-9.75	33.0625	-28.1562	-23.0625	6.09375	-13.6562	-57.0625	-12.375		0.01066
0.0107	-29.9062	20.7188	-40.625	3.15625	0.0625	-10.4062	9.46875	-24.0625	11	-15.0625	-22.4688	-6.46875	0.0107	-9.15625	-40.2188	-17.8125	-4.8125	-3.4375	-25.5312	23.5625	7.0625	20.75	37.0625	20.125	15.8438	-6.1875	-5.21875	35.5938	12.1875	-20.9688	0.84375	45.0312	32.5	1.21875	0.01068	10.0312	-31.0312	-25.5625	3.21875	19.7812	13.9688	24.1875	22.6875	17.4062	1.40625	6.03125	-4.3125		0.01068
0.01072	-27.2812	-21.8125	7.9375	-22.7812	4.28125	-18.2812	21.3125	2	-41.25	1.53125	1.46875	10.4688	0.01072	59.9375	7.96875	-27	-31.0625	15.8125	10.75	-24.25	-9.5	-31.125	-19.7812	15.7812	-2.96875	-5.8125	-9.90625	-30	-8.375	1.9375	2.8125	-45.1562	36.7812	-6.25	0.0107	-11.9062	9.375	9.875	-8.53125	-13.0312	-27.5625	-14.8438	-33.5938	-4.28125	18.6562	0.71875	16.0625		0.0107
0.01074	52.7812	-17.625	-20.7812	-17.7188	-20.9688	11.8438	47.875	-2.5	-10.5	11.0625	3	-30.125	0.01074	-28.0625	31.9688	-6.9375	4.46875	-3.625	20.9375	-1.3125	-10	-45.0938	13.5938	-2.40625	-0.25	-4.3125	-2.875	-30.0625	14.6562	11.4062	43.5938	-16.875	-6.125	-1.3125	0.01072	-31.125	-7.40625	12.25	-2.71875	-26.5312	-2.78125	-29.4375	-22.375	-15.1562	-3.90625	-12.4062	16.9688		0.01072
0.01076	-28.875	-0.125	-22.9375	-3.5625	-21.8125	-44.25	7.5625	-13.2812	9.90625	3.0625	-17.625	12.2188	0.01076	-27.5625	-38.2188	8.25	9.96875	-12.0938	-25.5312	21.4688	-0.3125	0.0625	-28.5312	16.5312	34.7188	2.375	30.5625	28.5312	5.34375	14.125	15.5625	23.9375	20.8438	-16.2188	0.01074	0.5625	-19.6562	-20.3438	-15.25	2.4375	23.0625	-21.7812	14.2812	-9.3125	-38.4688	37.3438	-7.78125		0.01074
0.01078	-41.5625	-27.2812	25.2812	8.125	-1.1875	-35.1875	22.9062	10.25	-15.1562	12.2188	-12.4688	1.40625	0.01078	15.4375	12.1562	-13.125	3.96875	26.0938	-0.375	-13.5312	-3.5625	1.6875	-23.625	17.5	-17.25	-19.5938	-16	-35.4062	-47	13.625	17.3438	-14.5	33.625	-11.75	0.01076	7.15625	8.71875	-0.21875	-15.625	-3.25	-7.625	-16.2812	21.4375	4.4375	10.6875	-8.65625	-16.9688		0.01076
0.0108	34.4062	-8.84375	-14.1875	-20.9062	5.5625	34.0312	28.4375	-17.6562	-26.25	-22.625	11.4062	-34.125	0.0108	8.4375	29.7188	-10.2188	7.96875	-42.7188	18.9688	-16.9688	-17.125	3.3125	6.4375	-29.75	-38.4062	-15.9688	-18.4062	-20.6562	0.96875	1.75	34.0625	-20.75	-37.125	-17.5938	0.01078	-4.46875	-2.1875	9.90625	-7.0625	-1.15625	-44.2812	12.5938	-39.8438	-9	-0.78125	-19.6562	-12.875		0.01078
0.01082	-4.75	-2.5625	-8.875	-10.3125	-22.7188	-12.8438	-41.125	14.4375	24.375	-10.625	-33.4688	7.5625	0.01082	-35.1875	-21.5625	-19.5938	-5.75	-2.03125	6.8125	10.4688	9.09375	38.8438	-16.5	-3.0625	-13.0625	-3.59375	-30.125	43.75	9.71875	-6.84375	-9.125	43.8125	-11.2812	8.0625	0.0108	15.0312	-12.625	-11.7188	-10.25	17.2188	24.8438	6.09375	7.09375	11.4688	-12.5	-5.65625	-3.28125		0.0108
0.01084	-30.375	-15.2188	39.6562	-8.9375	-5.3125	-36.4688	-9.3125	0.15625	-20.6562	3	-29.9062	9.84375	0.01084	11.3438	3.71875	2.125	5.5	38.3438	-27.8438	-30.8438	9.375	-32.0312	-30.5312	7.1875	-8.8125	-32.375	-42.8438	-22.0312	-23.3125	1.96875	-36.0625	-8.21875	20.625	-19.125	0.01082	-27.4375	17.0938	-0.71875	-8.125	-4.5	18.2812	37.7812	16.9375	-11.6562	14.5312	8.78125	-3.59375		0.01082
0.01086	14.3125	-13.9062	-24.8438	-4.3125	-6.25	-1.25	14.4062	-27.9375	-27.5	-25.9062	18.2812	-14.7812	0.01086	13.25	26.4688	7.34375	-0.5	-25.9375	7.875	-13.875	-16.3438	-47.0312	-3.21875	-34.375	4.875	-29.8125	0.9375	-31.1562	4.53125	-8.78125	-16.75	-20.4062	-30.4375	0.71875	0.01084	9.28125	-30.9062	24.8438	-6.6875	-15.0625	-33.7812	-18.25	-10	21.9375	-14.9062	-8.75	17.125		0.01084
0.01088	-9.125	18.5625	-36.25	2.125	-15.1562	-10.8125	-9.3125	-8.0625	16.5625	4.8125	-6.65625	-5.625	0.01088	-48.0312	-4.125	-4.71875	23.5625	-34.3125	-20.7812	26.0938	-12.0938	26.1562	9.21875	-6.65625	-5.21875	20.625	3.3125	25.1562	19.0625	-11	-18.25	22.9688	-21.625	4.40625	0.01086	12.4688	-3.625	-16.625	2.4375	-8.46875	-17.2188	12.6875	-14.2812	-20.7188	-20.7812	-10.5312	4.46875		0.01086
0.0109	-4.03125	-9	34.1875	-28.8125	-25.6875	-26.7812	-25.125	2.5	-16.1562	9.875	-19.8125	-3	0.0109	3.46875	-34.7812	6.28125	-11.0938	35.4375	-5.125	-23.4688	23.9375	10.0625	-24.5	17.2812	0	17.7188	15.5938	-8	-24.0312	12.1562	-2.71875	-2.09375	40.5938	-2.4375	0.01088	-54.8438	28.6562	-26.0312	-8.15625	16.0625	-11.3125	-36.8125	21.5312	-20.5	6.625	15.9375	-37.9062		0.01088
0.01092	-22.5	-25.6875	1.5625	16.9062	-3.03125	-4.875	15.0312	-19.8125	-10.5	10.3438	27.0938	-10.6875	0.01092	-8.3125	6	4.21875	-15.5625	6.34375	22.625	-27.9688	-8.375	-18.7188	53.125	-52.8438	-5.4375	3.53125	2.9375	-15.3125	-20.9688	-11.7188	4.3125	-34.1562	-0.25	-2.125	0.0109	10.3438	-8.1875	15.9688	7.9375	9.8125	1.09375	0.9375	-6.78125	-6.9375	0.3125	-5	11.4688		0.0109
0.01094	-7.15625	2.25	-35	3.875	19.9688	16.8438	-18.2812	-31.2812	14.0938	20.375	-11.6875	-21.6875	0.01094	-19.3438	0.46875	7.5	-0.9375	-33.8125	-43.7188	29.875	-9.125	-5.71875	-26.9688	-25.625	-1.78125	-12.5625	-5.28125	16.2812	18.0938	-10.8125	-4.375	-0.78125	-45.625	10.0625	0.01092	12.5312	3.90625	15.6562	5.3125	-3.53125	3.71875	36.6562	-17.4062	13.7812	9.40625	-15.3125	0.25		0.01092
0.01096	-13	6.3125	2.1875	-36.4688	-5.53125	-4.875	-31.5938	-1.75	23.5	16.4062	3.0625	25.2188	0.01096	-14.1875	-41.1562	-8.90625	-12.4062	20.2812	-4.5625	-13.3438	31.9688	4.625	-17.6875	45.75	20.7188	-14.4062	27.5312	-1	14.125	-17.2812	-15.7812	0.8125	8.53125	-1.53125	0.01094	-2.75	-1.9375	-16.5938	-18.2188	9.75	-1.5625	-6.625	9.78125	-3.4375	11.3438	5	-2.15625		0.01094
0.01098	-16.3125	-11.1875	-15.6875	-1.34375	8.9375	9.1875	21.7188	-26.0625	-13.4062	-17.0938	15.3438	-4.375	0.01098	-18.0938	-0.25	9.875	-33.5	1.84375	5.78125	-15.125	-18.1562	-36	19.1562	3.3125	-9.40625	-0.375	-13.7812	-41.0312	-8.40625	-10.375	1.78125	-2.3125	5.9375	-0.25	0.01096	-20.5625	-3.34375	-29.7812	-12.25	-20.9688	-16.5938	-40.4375	-49.2812	-14.6562	-23.0312	1.46875	-3.46875		0.01096
0.011	8.40625	7.625	-26.0625	9.0625	6.5625	-17	-14	-12.1562	-11.25	1.78125	-14.5938	17.9375	0.011	-7.5	-2.53125	-22.2812	-3.84375	-16	-7.78125	12.3438	-32.4688	14.3125	-11.0312	-22.8438	0.03125	-4.5	11.6875	0.15625	-6.84375	7.15625	-17.375	6.65625	-57.1562	-10.25	0.01098	-2.625	-23.7188	-51.3438	16.6875	-18.8438	5.28125	12.5625	-16.9688	-11.2812	-12.5	39.6562	41.7188		0.01098
0.01102	3.96875	-12.5312	-21.3125	-8.09375	-9.125	-0.71875	-34.5312	10.875	-3.4375	12.4688	-28.8125	-8.96875	0.01102	17	-15.7188	8.21875	21.5938	9.90625	6.125	-20.625	1.8125	10.5625	5.03125	54.4062	24.125	13.9062	-11.0312	26.5312	17.3125	1.96875	24.5312	-5.25	1.1875	-5.28125	0.011	9.78125	-9.84375	26.9062	-5.78125	-6.6875	8.5625	3.03125	16.625	4.40625	-2.9375	-15.25	-6.03125		0.011
0.01104	-3	-6	-28.0312	-3.8125	-45.25	13.5625	-2.875	-8.84375	9.25	-16.9688	7.21875	-22.125	0.01104	21.0625	-16.7812	-2.875	-17.375	-7	0.125	-40.9062	-36.9062	-23.3125	4.0625	15.4375	-25.9062	-5.21875	-11.4688	-36.4062	-20.0312	3.90625	-3.4375	-27.625	12.7188	-0.0625	0.01102	-3.25	-6.25	29.875	2.5	11.8125	-14.0312	-22.4062	2.375	-6.46875	21.9062	-12.75	-22.8125		0.01102
0.01106	1.5	-4.75	-4.65625	3.5	18.375	-3.3125	1.21875	3.9375	3.4375	5.5625	19.875	7.28125	0.01106	-20.5	-10.8125	-19.5938	-22.0938	-20.2812	-28.125	5.40625	-37.4688	-0.3125	2.09375	-18.4375	-26.4062	-51.7812	-21.4062	-0.15625	-11.3438	-34.5938	-7.53125	8.03125	-46.4062	11.9688	0.01104	-3.65625	0.46875	-11.3125	5.15625	-14.4375	-1.1875	2	17.0938	7.9375	-8.21875	-10.4062	37.2188		0.01104
0.01108	1.71875	-15.1875	-9.9375	-41.875	40.375	3.65625	-22.4688	-4.25	-21.625	44.125	-24.375	-5	0.01108	12.3438	-0.5	-17.8438	17.4688	-1.96875	-22.1562	-2.40625	36.7188	21.875	-26.7188	19.0625	23.3125	7.03125	8.71875	-5.375	25.8438	-3.875	-1.5	-13.4375	-11.0625	-5.90625	0.01106	7.78125	16.9062	0.875	-18.125	3.1875	-7.46875	-3.375	-4.3125	-1.3125	-8.84375	10.9375	-12.4688		0.01106
0.0111	-2.75	7.40625	-4.4375	3.0625	-38.6875	-7.875	-14.9688	9	13.8125	-17.5625	-21.1875	-13.0312	0.0111	-1.625	6.875	-10.4688	-13.5625	10.9375	45.7188	-35.3438	10.8438	-20.5625	0.75	9.3125	-9.5	13.7812	-22.4375	-26.4062	-24.8125	8.53125	1.78125	-14.4375	10.1875	13.7812	0.01108	9.5625	0.03125	8.65625	13.25	20.3125	-18.7812	-15.2188	-16.9688	1.34375	-5.5625	-23.0625	-37.125		0.01108
0.01112	3.90625	26.7188	-10.9062	30.1562	-1.40625	-3.65625	-8.5	-14.6875	0.65625	-3.25	-15.9688	-16.0938	0.01112	-17.6562	-36.125	11.9062	3.84375	-36.1562	-16.1562	17.9062	-17.2188	24.0312	-28.6562	-47.875	-32.4375	-8.09375	-5.28125	-6	-10.125	-13.75	-16.25	3.0625	-10.125	-23.9062	0.0111	-17.5312	-8.90625	-12.375	5.6875	31.125	9.84375	-3.46875	29.8125	-16.9375	3.84375	-0.96875	13.6562		0.0111
0.01114	1.21875	-30.9688	3.15625	-16.7188	12.4062	-19.25	-5.8125	4.65625	-5.78125	10.4062	-1.25	-15.375	0.01114	24.0625	-1.78125	-2.875	23.4062	1.6875	-23.125	17.3438	51.0938	46.7188	-9.65625	0.9375	20.3125	-15.4688	-5.4375	16	-14.5	-2.0625	-8.125	-20.6562	-6.21875	-0.59375	0.01112	27.8438	-6.25	-41.9375	-18.2188	-26.2812	18.0312	-4.125	23.6875	22.5625	-13.3125	-16.1875	-6.46875		0.01112
0.01116	18.0938	-19.9375	-7.25	-10.4688	-21.75	3.5	13	32.2188	-20.2188	-24.9688	-32.5	-12.25	0.01116	13.875	4.78125	-9.09375	-7.90625	-0.21875	19.0938	-40.7812	40.4375	-35.125	-2.21875	42.25	-0.4375	21.5625	-5.625	-17.8438	-3.5625	30.2812	-5.15625	-29.1875	9.5625	-14.6562	0.01114	12.375	-27.8438	11.6562	-11.4062	-19.375	0.75	-26.0625	-26.7812	3.1875	-24	-25.0938	-8.75		0.01114
0.01118	13.5	6.90625	-8.59375	-4.25	4.71875	-1.875	-16.4062	-34.6875	1.84375	-35.2812	-32.375	-19.3125	0.01118	-49.5312	-5.15625	19.5	-25.8438	-52.4062	-8.125	-0.125	-21.8125	-26.7188	-4.125	-56.2188	-20.0938	6.21875	15.5312	-10.5625	8.59375	-17.625	-7.625	7.0625	2.46875	5.21875	0.01116	-20.875	-2.1875	-13.1562	21.8438	-1.9375	-15.4375	16.2812	-12.5625	-21.875	-10.6875	-13.25	21.75		0.01116
0.0112	-24.6562	-26	-18.625	-8.8125	-8.40625	-34.9062	-3.6875	-26.625	-0.6875	-15.9375	-0.40625	11.0938	0.0112	-5.34375	-8.28125	-11.1875	-15.3125	-1.4375	-16.3438	21.7188	34.2188	1.75	11.875	-12.4062	33.125	-9.96875	17.75	30.5	-4.71875	0.46875	-13.125	-4.9375	-19.2188	15.9062	0.01118	-21.375	7.5	-15.8438	-5.9375	-3	-6.375	2.5	-3.71875	3.15625	0.21875	31.9688	2.71875		0.01118
0.01122	-21.0625	-8.375	-10.6875	-26.875	5.21875	27.4062	-37.875	21.2812	-30.0938	14.1875	0.15625	-40	0.01122	1.625	6.5625	-31.6562	-3.46875	-10.9688	9.09375	-5	27.5312	-33.5312	27.75	23.25	20.25	1.0625	-7.53125	-2	16.25	27.5938	-8.875	26.8125	27.625	3.4375	0.0112	-16.375	-11.625	-0.4375	-29.2812	5.1875	-25.9375	4.46875	-21.5	17.2188	-9.34375	-0.8125	-20.4375		0.0112
0.01124	22.0312	20.8125	-6	5.71875	-3.09375	7.71875	14.4375	-21.5625	0.71875	-18.875	-11.4375	-5.09375	0.01124	-34.7812	-13.3125	-8.09375	-4.125	2.875	12.8125	0.96875	-32.1875	-34.375	42.6875	-9.96875	-39.7812	-4	-11.8438	-17.1562	-2.25	-32.6562	-25.7812	-16.2812	7.96875	-12.6875	0.01122	-18	-11.8438	-5.375	-16.3438	13.5938	32.6562	-3.84375	-18.0938	-7.125	17.2812	0	13.0938		0.01122
0.01126	-51.1562	-8.0625	2.15625	4.96875	8.53125	-26.0938	10.9375	-18.5	-6.625	16.7812	-28.4062	28.4688	0.01126	-8.25	-20.5938	1.0625	19.9375	-5.3125	-12.5312	14.5625	5	25.6875	11.7812	-5.90625	10.625	-23.5625	4.78125	1.1875	6.59375	-9.84375	15.875	4.21875	-46.0625	-4.90625	0.01124	-2.8125	16.375	0.34375	8.75	-12.7188	-24.7188	0.78125	31.2188	6.28125	-24.6562	25.0625	9.90625		0.01124
0.01128	-10.6875	-44.1875	3.96875	-16.875	-16.7812	-35.5625	1.125	13.8125	-36.4688	10.4688	-7.09375	-6.875	0.01128	24.875	46.25	-3.5625	16.4688	2.40625	3.1875	-7.875	36.9688	1.1875	5.375	14.0938	23.375	-14	-26.6562	-3.8125	-4.125	5.3125	7.875	7.96875	28.4375	-9.65625	0.01126	-0.90625	-1.1875	16.1875	10.0312	-2.53125	-21.4375	-27	-9.5	-0.78125	10.75	-0.78125	-30.1562		0.01126
0.0113	11.2188	9.1875	-0.65625	-40	-24.4375	-0.84375	-22.625	2.625	8.4375	-18.7812	7.0625	-24.0625	0.0113	-10.7188	14	3.125	-2.5625	14.0938	4.90625	12	-32.4375	-26.2188	12.9688	18.7188	-62.9062	1.96875	-4.4375	-30.125	-2.03125	9.78125	-38.875	5.3125	26.3438	-23.6562	0.01128	-28.8125	-45.5938	6.25	-14.7812	13.0312	-1.46875	-14.375	-12.5	-25.25	6.65625	-36.5312	-9.25		0.01128
0.01132	-13.2188	-2.5625	-13.625	-9.15625	-28.9688	-24.9375	-17.4062	-20.2812	21.0625	-4.3125	6.90625	27.3438	0.01132	-13.4062	-26.7812	-1.375	11.5312	-18.1562	-27.8125	12.4688	-27.4375	-14.0938	-22.3125	-27.75	3.03125	-7.84375	1.59375	10.5938	5.5	-12.5625	-5.3125	-3.1875	-56	-7.21875	0.0113	19.875	-1.90625	-21.1875	0.4375	-43.25	4.96875	18.0312	16.8125	-26.7812	-2.4375	5.0625	-12.8125		0.0113
0.01134	-0.8125	-32.8438	1.625	8.3125	-22.875	-31.7188	-1.5	18.8125	-23.0312	-33.3438	9.90625	2.90625	0.01134	18.1562	20.1562	-27.625	15.5312	4.78125	8.0625	-23.5312	2.6875	-2	-13.1562	17.2188	5.40625	-5.1875	-12.4062	-20.7812	-16.7188	19.0938	-3.9375	5.15625	-11.6562	-11.6562	0.01132	-19.25	1.90625	1.0625	1.90625	30.3125	-0.53125	-2.9375	3.9375	-12.5625	19.875	-2.40625	-7.84375		0.01132
0.01136	-4	-5.78125	-3.6875	-1.34375	3.59375	-2.34375	-20.625	-0.46875	-29.0625	4.5625	23.3438	-8.625	0.01136	-22.9062	-10.625	-5.75	-11.6875	-1.3125	-8.28125	-44.4688	-9.4375	-3.96875	7.15625	-32.5	-35.3438	8.15625	-12.7812	-13.4688	-9	9.8125	-8.375	-5.40625	1.9375	-13.0625	0.01134	-7.25	4.875	19.9062	12.9062	-9.375	-0.3125	-7.71875	16.1875	30.6875	-2.21875	-28.75	36.0938		0.01134
0.01138	-12.3125	16.8438	3.3125	-10.2188	-27.7188	-53.7812	-34.4062	-20.8125	49.625	-2.3125	-23.9062	8.40625	0.01138	-39.5	-21.0938	-5.625	13.3438	-26.9688	-47.9688	-4.375	-1.25	4.65625	1.71875	-38.2188	-5.375	-27.3438	23.3125	3.875	-7.21875	-33.6875	-31.5312	-12.7188	-30.4375	31.9688	0.01136	28.9375	5.4375	-14.0312	-13.125	-50.7812	-4.71875	8.75	-38.3438	-0.25	-9.34375	5.6875	3.53125		0.01136
0.0114	2.40625	-32	-15.9062	-19.375	-12.3125	2.375	-14.5	18.3438	-19.9688	-3.78125	-29.5625	12.0312	0.0114	32.125	9.8125	25.2188	-5.78125	-0.46875	26.375	-19.75	8.65625	8.65625	-36.375	13.1875	8.375	0.96875	-12	4.375	-5.5625	8.96875	26	19.6875	-12.75	15.0312	0.01138	-6.21875	23.9688	10.7188	-28.25	16.125	1.8125	-7.25	-20.7812	-4.8125	-3.65625	13.0312	-40		0.01138
0.01142	34.8438	1.15625	8.8125	12.5312	34.9062	6.34375	16.1875	-50.1875	-28.4062	-20.5	25.7812	-19.9688	0.01142	-26.2188	9.0625	-4.0625	-30.2188	33.5938	21.0938	-0.6875	-6.78125	-4.46875	2.4375	-34.5312	-11.9688	24.875	1.3125	-17.4062	-13.0938	12.6562	-13.4375	-18.0938	-0.90625	0.4375	0.0114	-23.9688	-3.90625	0.53125	13.6562	16	4.96875	2.1875	6.25	-1.875	5.0625	-0.0625	-23.8125		0.0114
0.01144	-10.125	42.875	-2.71875	3.78125	15.375	-5.21875	-36.7188	-13.875	31.8125	-22.8125	-17.5	7.71875	0.01144	-20.6562	-11.9062	-20.125	7.40625	-13.125	-44.5	3.65625	-23.875	-16.7188	18.125	-10.7812	3.6875	-27.9375	1.8125	1.96875	-1.625	-32.8438	-43.9688	-12.0938	-4.0625	5.4375	0.01142	-12.3125	0.28125	-18.5	-20.0625	-11.4062	-38.0625	9.71875	13.0625	11.3125	-10.4062	-9.5625	31.8438		0.01142
0.01146	12.4062	0.53125	-22.9375	-4.5625	-18.625	21.3125	3.09375	-5.125	-17.5625	5.5	0.5	12.8125	0.01146	-5.65625	-21.8438	5.625	-10.625	-4.84375	-9.4375	-31.8438	6.375	21.0625	-14.25	9.34375	24.0625	-9.90625	16.4062	13.9375	-2	-16.3438	6.15625	-31.0312	-25	-18.25	0.01144	5.84375	5.46875	-8.8125	4.34375	-12.0625	-29.2188	-10.5	7.03125	-26.4688	17.0312	13.0312	-43.625		0.01144
0.01148	37.375	-22.8125	-17.625	5.96875	-21.25	26.6562	25.4062	-40.8125	-15.7188	-21.0625	15.4062	-12.25	0.01148	-2.625	-2.6875	18.5938	-28.0625	-1.75	-5.65625	17.3125	-29.0625	1.40625	12.6562	-33.9688	-12.9062	12.2188	-25.1875	-13.5938	-15.6562	-0.6875	7.71875	9.625	5.96875	-28.875	0.01146	-14.75	-32.0625	0.90625	7.40625	-3.46875	4.84375	-10.8125	1.875	-34.9062	-9.21875	-8.125	15.4062		0.01146
0.0115	11.5312	-13.5938	1.84375	-1.125	26.4688	-12.9375	-32.1562	-17	20.2188	6.34375	-11	-6.4375	0.0115	-15.9062	-22.9688	7.8125	-22.0312	-5.5625	-12.625	1.71875	-29	-7	1.90625	-17.0625	-18	-6.875	13.6562	1.09375	-3.9375	-24.8125	-40.8125	12.7188	-7.5625	4.84375	0.01148	8.34375	-0.5625	-25.4688	17.3125	-38.3125	18.0938	1.15625	-27.2812	30.4688	-25.9375	-10	21.2188		0.01148
0.01152	-25	8.75	-17.1562	-13	-13.9375	-29.7812	-18.2188	23.2188	-3.375	30.3125	-17.9062	16.5938	0.01152	14.3438	2.4375	1.3125	-6.28125	-10.0938	-15.375	-24.7188	0.53125	-6.5625	-27.25	31.625	12.9375	-13.1875	-2.59375	2	-34.625	-5.59375	13.625	-8.9375	-15.4062	-1.53125	0.0115	-2.28125	22.7812	-14.5	-0.75	11.375	1.625	-12.7812	-6.28125	3.5625	-0.8125	-13.25	-40		0.0115
0.01154	-15.8438	6.84375	-20.875	15.2188	-3.40625	19.3125	22.3438	-9.4375	-13.0938	-12.2812	-5.5625	-18.875	0.01154	24.6875	-23.1875	-8.46875	-16.8438	4.4375	13.5938	-0.5625	-21.2188	-4.78125	-9.875	8.71875	3.875	8.875	-18.5312	-9.59375	16.0625	22.5938	49.5938	-6.96875	4.90625	-4.71875	0.01152	-12.0938	-34.2188	13.6875	-3.90625	1.46875	-12.25	-4.0625	15.0625	-14.5625	39.3125	12	-21.1562		0.01152
0.01156	4.46875	-11.625	1.5	-10.3438	17.625	-7.21875	17.6562	-9.875	13.875	-10.3125	13.1875	-25.0625	0.01156	-37.7188	3.65625	-29.3125	-13.25	-11.1875	11.0938	0.125	-0.5625	2.375	0.71875	-34	-4.46875	-13.5625	5.46875	-18.6562	23.1562	-32.2188	-40.9375	-4.96875	-18.4375	15.3125	0.01154	9.21875	-10.9688	-16.4375	15.9062	-27.375	5.90625	8.75	14.0938	14.8438	-43.6562	9.75	23		0.01154
0.01158	-0.90625	-13.3438	-14.9062	-41.9062	-9.5625	-18.4062	-19.5312	29.1875	-31.0625	17.9688	-26.2188	4.53125	0.01158	7.3125	4.15625	11.3125	6.71875	6.25	7.21875	-12.4062	-9.21875	4.1875	3.21875	23.3438	2.71875	-1.6875	3.1875	13.125	-37.3125	-1.90625	-14.7188	4.125	6.21875	10.4062	0.01156	16.7812	5.375	32.3438	-37	13.25	-2.75	-24.8125	-24	-3.375	2.90625	-25.5938	-0.375		0.01156
0.0116	-10.1562	0.46875	-56.2188	-17.2812	-29.875	28.3125	-13.1562	-14.3125	2.6875	9.25	10.7188	1.4375	0.0116	25.9688	-26.4062	1.03125	-12.375	4.75	35.75	-3.90625	-30.0312	-3.15625	-8.40625	-7.65625	-5.875	10.4688	-6.78125	-10.125	15.9375	10.9688	51.5	-25.0938	-19.9688	-22.9688	0.01158	-15.2188	-29.1875	-7.5625	26.875	13.5	-22.9062	-8.0625	19.5938	-30.2812	30.4375	18.9375	-7.53125		0.01158
0.01162	14.7188	-2.09375	-21.7188	16.75	16.6875	-9.09375	5.625	-43.8125	9.84375	-12.2812	-45.3438	-20.7812	0.01162	-14.1875	0.875	-28	-2.125	-21.2188	16.4688	8.5	-2.71875	-14.75	-33.875	-35.5938	-7.40625	-14.4062	-7.65625	-10.4688	30.6562	-13.4375	-20.3125	-2	0.6875	-1.15625	0.0116	-22.375	9.65625	-7.40625	12.1562	8.03125	15.4375	13.8438	4.9375	-43.8125	-4.75	-7.1875	13.8438		0.0116
0.01164	-6.0625	-37.875	9.0625	-17	-38.9688	-25.4688	-8	45	11.5938	6.46875	-42.6875	16.1562	0.01164	8.4375	-4.8125	-4.9375	24.2188	-3.40625	25.1875	-8.6875	16.2188	-6.1875	5.84375	25	-5.40625	-26.4062	-4.28125	27.2812	-18.2812	-3.5	-38.6875	16.7812	-17.4375	22.9375	0.01162	29.0312	14.6562	-12.3438	-55.875	-7.59375	3.59375	8.96875	-17.125	45.125	-25.4062	-17.0625	-3.78125		0.01162
0.01166	11.4375	2.71875	-10.3438	-2.65625	-18.1562	-3.9375	-2.78125	-3.3125	-0.9375	-8.96875	27.5312	4.96875	0.01166	33.9688	14.3438	13.9688	-17.0938	1.09375	18.3125	-18.75	-9.65625	-12.125	-9.5625	13.2188	2.21875	5.84375	-30.0625	-24.7188	-29.9375	6.375	30.0625	-33.2188	12.375	-16.3438	0.01164	-0.21875	-32.9062	2.0625	18.75	8.34375	-32.5	-44.375	-9.40625	8.28125	-1.28125	-21.1875	-7.9375		0.01164
0.01168	-12.0938	11.9062	-2.5625	3.5	31.0625	1.3125	19.1875	-25.3125	-12.4062	-14.6562	-5.40625	-15.75	0.01168	-12.2188	-12.4688	-13.0312	10.25	-30.7188	-2.46875	23.4375	-7.875	10.3125	-6.90625	-21.25	-20.0938	0.125	-15.875	-29	32.1875	18.25	6.40625	20.3125	4.90625	-7.21875	0.01166	4.71875	-30.25	7.40625	17.0625	-16.8438	15.2188	6.03125	10.8125	-22.9375	24.6562	-1.34375	0.4375		0.01166
0.0117	-35.8125	-24.625	7.96875	1.03125	-9.15625	-41.0625	-14.3125	-6.90625	-17.5	7.625	-22.4688	-10.4062	0.0117	-16.9688	15.8125	-27.8125	2.40625	-8	0.34375	0.1875	12.7188	-22.8125	12.25	1.21875	-1.96875	-8.90625	6.03125	32.5	-23.125	-10.1875	-20.5625	-17.7812	15.5625	14.0938	0.01168	-3.5	36.1562	-17.2812	-28.6562	-1.71875	23.4062	13.4062	9.375	3.84375	-42.4688	35.4375	-4.4375		0.01168
0.01172	-4.40625	6.8125	-10.3125	4.5625	-34.7188	-2.65625	0.28125	1.4375	-15.0938	-44.0312	-4.28125	-2.5	0.01172	5.6875	-13.5625	17.1875	-9.5625	0.84375	15.875	-11.7812	-5.03125	-31.75	-18.25	21.625	3.8125	1.9375	-18.9375	-3.5625	-32.5	-4.75	-2.59375	-9.9375	6.71875	-26.7188	0.0117	0.5625	1.34375	19.6562	-13.875	-5.21875	-12.9688	-11.6562	-15.8125	18.6875	-4.28125	3.59375	-6.28125		0.0117
0.01174	5	4.65625	6	-8	15.7188	-14.5938	9.96875	-21	15.1562	-15.9688	-8.84375	-9.59375	0.01174	-22.8125	-27.4375	-15.8438	6.875	-42.4688	-9.03125	-3.90625	-6.8125	-9.09375	16.375	-51.5938	-11.5312	10.3438	-26.1562	-13.25	23.9375	-0.875	-11.2188	17.9375	-24.2188	17.9062	0.01172	-7.46875	-8.5625	-23.4062	1.21875	-3.40625	-0.40625	-10	-7.96875	-3.09375	2.09375	-5.84375	-5.625		0.01172
0.01176	-18.7812	-12.0312	25.9375	-20.875	16.875	-38.0312	-9.53125	13.4688	-16.25	2.84375	-33.0625	3.90625	0.01176	-17.4375	3.625	0.09375	7.71875	-22.1562	-36.5938	15.5625	36.7188	12.1562	-6.125	5.21875	20.5938	-34.5	10.2812	3.71875	-7.90625	-12.25	-35.875	-3.875	9.5625	-10.0625	0.01174	-7.375	2.34375	-17.875	-14.3125	-7.65625	14.1562	-9.8125	6.09375	-19.4688	-23.7812	-26.2188	2.53125		0.01174
0.01178	-30	-25.2812	10.9062	-2.6875	-47.2188	33.7188	-11.125	0.65625	-12.3125	-11.0625	11.2188	-13.4688	0.01178	25.4062	0.90625	3.3125	-26.6875	53.5312	18.9688	-14.4062	-3.9375	-23.8125	3.71875	29.3125	20.7188	-34.0625	25.1875	9.21875	-31.7812	4.03125	-6.5625	-13.4062	3.0625	28.0312	0.01176	-22.9062	-4.90625	-3.5	-15.9688	9.65625	-18.0312	3.03125	15.7812	-13.25	-3.375	-12.4062	-17.1875		0.01176
0.0118	-21.0625	27.2188	9.21875	6.59375	-16.5	-23.9688	-19.4062	-35.0312	7.71875	-13.1875	17.9688	2.4375	0.0118	-18.4375	10.125	-33.625	15.3438	-1.8125	7.875	7.75	-36.25	-14.0312	23.1562	-46.4375	-51.5312	17.2812	-22.9062	-19.9688	26.4375	6.9375	15.2188	26.9688	-16.4375	3.28125	0.01178	-20.8438	-26.9375	13.6562	5.3125	5.125	-18.6562	5.8125	-33.1562	-20.7812	2.21875	-5.375	30.1875		0.01178
0.01182	-27.5938	-24.5	9.0625	-30.9375	31.0938	-20.875	4.1875	-3.75	-27.3438	5.6875	-16	-0.28125	0.01182	-1.65625	-0.25	-17.0938	15.4062	-32.5	-32	1.625	3.6875	16.375	-24.8125	1.0625	-29.5312	2.625	-30	14.8438	10.8438	-10.2812	-31.0312	7.625	-6.625	26.3438	0.0118	14.9688	-17.2812	11.2188	0.5625	-47.1562	2.71875	15.9688	-12.0625	14.9375	37.375	-4.75	-25.6875		0.0118
0.01184	-7.25	-21.0312	11.75	-11.2188	-36.9688	-15.4375	5.28125	13.0312	-30.2812	-1.40625	-7.6875	6.65625	0.01184	10.9688	-9.71875	-4.0625	-18.1875	46.0625	41.5312	-35.625	7.5	3.96875	-20.125	32.8125	34.8125	-20.1562	32.0312	-11.25	-0.25	-3.125	-11.7188	-18.25	-6.90625	1.9375	0.01182	-3.78125	11.4688	-7.03125	-31.2188	-1.78125	-2.96875	-21.375	3.3125	-8.15625	-15.7812	24.5938	-2.71875		0.01182
0.01186	0.1875	22	8.21875	19.625	-40.8438	-11.7812	-55.1562	-37.5625	-6.46875	0.4375	10.1562	11.8438	0.01186	-22.625	9.21875	-14.7812	14.5938	-13.8125	1.9375	-25.5625	-34.4688	-10.4688	5	-28.3438	-27.25	-8.78125	-7.34375	-26	50.7812	19.9688	7.25	11.125	-5.40625	-40.2188	0.01184	16.25	10.0312	-6.15625	11.3438	-10.5	-4.25	14.9375	1.15625	-36.9062	-28.4375	-13	40.875		0.01184
0.01188	-28.9688	-17.8125	-16.7812	-23.6562	34.0938	17.1875	-36	-6.53125	44.375	1.75	-12.1875	16.5938	0.01188	-15.8125	-0.9375	-12.125	15.5312	-11.5	-43.5312	-11.125	-8.9375	35.5312	-8.21875	-18.4062	-35.8125	-7.25	-29.5625	0.8125	12.6875	11.9375	6.9375	-49.1875	-33.3125	7.03125	0.01186	8.65625	-0.375	-13	19.8438	-4.5	-8.625	-7.75	-20.3125	26.625	34.4688	-4.84375	-0.09375		0.01186
0.0119	28.8438	-6.21875	-18.5	11.4688	-12.9062	-16.5312	21.7188	40.7188	-50.5	-6.4375	-1.78125	-4.59375	0.0119	19.6875	-15.3125	7.15625	-15.9375	21.75	-2.15625	-26.5	9.78125	19.8438	-43.75	16.0938	36.9688	-1.4375	43.8125	-14.375	-18.7812	16.3438	0.65625	-15	-5.65625	11.5938	0.01188	-17.125	-11.9688	14.9062	-0.53125	25.5938	-22.2188	-29.125	-1.4375	9.8125	-18.0625	-8.4375	-9.90625		0.01188
0.01192	23.9062	8.84375	-22.125	22.875	-16.0312	-19.5938	-21.6562	-9.53125	-1.5625	-8.8125	8.28125	-24.2812	0.01192	-28.8438	0.5	0.6875	-0.8125	8.375	14.7188	-8.53125	-14.4375	6.09375	16.8125	-8.875	1.3125	-1.6875	7.9375	5.71875	4.3125	13.75	-10.625	-6.03125	-28.3125	-3.3125	0.0119	-22.9375	23.4688	0.84375	-15.125	15.75	5.15625	4.09375	14.9688	-5.09375	-33.2188	-3.0625	9.09375		0.0119
0.01194	-11.4062	5.90625	-5.71875	2.9375	-11.3438	-8.8125	-36.5625	-14.875	13	11.5	-22.0312	34.7188	0.01194	-8.65625	-2.34375	-7.65625	3.4375	-40.375	-18.25	4.0625	6.34375	48.375	3.53125	-22.875	-22.5	6.1875	-45.125	-14.5	11.1562	26.4375	-26	9.3125	-13.875	-4.4375	0.01192	9.3125	-15.8438	-23.7812	20.3438	-12.9688	17.5938	20.75	-19.125	-16.9375	-7.34375	38	-19.25		0.01192
0.01196	-10.9062	-30.0625	0.25	-3.59375	-8.46875	4.21875	13.5	-8.5625	3	0.96875	3.78125	-5.0625	0.01196	18.2812	-25.9062	-12.5938	-21.1562	16.8438	5.53125	-8.375	22.5312	19.5	-31.5625	18.5938	21.8125	8.96875	23.625	5.53125	-19.4688	1	-11.25	-30.9062	13.1875	11.3438	0.01194	-2	-10.0938	-9.28125	-19.5	17.6562	4.75	-40.1562	-2.90625	-3.75	44.1562	-3.59375	-36.5		0.01194
0.01198	-1.8125	19.4688	5.65625	-12.7812	22.9062	3.1875	-8.15625	-29.6562	17.5938	-33.1562	16.6562	-58.2812	0.01198	-33.25	-9.84375	39.5312	-23	20.9688	-13.2188	-11.2812	-38.0312	-22.9688	2.09375	-16.3438	2.78125	45.625	6.75	-15.6875	12.5625	-28.4062	11.875	1.40625	-11.0938	4.5	0.01196	-0.375	-8.375	14.1562	2.625	3.375	-3.8125	3.59375	4.90625	-9.25	-25.5312	-11.5	11.5312		0.01196
0.012	-0.90625	25.7812	6.1875	-1.46875	9.84375	-5.0625	-22.375	2.5	26.125	7.25	-12	-4.21875	0.012	-12.75	-11.6562	-17.5625	-8.96875	-30.8125	-33	4.875	-26.4375	17.625	5.46875	-25	-41.125	9.875	-35	-10.1562	3.65625	18.0312	-25.4688	15.375	-9.78125	7.125	0.01198	-5.34375	-0.40625	-11.1562	-19.4062	-45.0938	-5.625	10.7188	-11.125	6.65625	-6.90625	-24.125	20.8125		0.01198
0.01202	3.71875	-32.3125	-23.7188	-35.625	-0.25	14.4688	6.6875	4.5	23.625	2.8125	16.375	5.96875	0.01202	21.75	-13.375	7.40625	6.6875	-2.59375	-13.1562	-24.9688	4.9375	37.6562	-14.6562	-4.78125	27.9688	-13.8125	7.3125	-6.40625	-20.0312	-6.65625	9.5625	-15.5312	0.59375	22	0.012	-20.375	7.59375	-10.8125	0.71875	-6.625	-15.0312	2.46875	-10.9062	20.4688	38.5938	43.5	-48.9062		0.012
0.01204	18.9375	17.7812	-32	1.78125	-35.7188	9.9375	13.375	-6.90625	-2.3125	-19.375	12.3125	-39.25	0.01204	9	-31.4688	18.4688	-26.7188	19.9062	-7.78125	-0.6875	-20.8438	-36	3.9375	-7.5625	16.0625	7.125	8.4375	-4.65625	18.6875	-9.625	-10.6875	-17.875	-2.25	11.2188	0.01202	38.7812	-5.4375	5.71875	8.4375	30.1875	-0.8125	-16.625	9.875	-6.03125	0.75	-5.28125	-10.9375		0.01202
0.01206	-15.8125	12.5938	-11.2188	-3.3125	-4.4375	-44.6562	-4	3.5	-23.5938	-10.0938	-3.9375	2.375	0.01206	-20	10.0312	-2.1875	-15.5	-47.9062	-36.0625	28.9062	3.53125	-5.9375	-2.46875	-40	-21.875	-3.71875	-28.5	23.2188	-5.28125	-10.9062	-12.8438	25.7188	-6.09375	-26.9375	0.01204	6.53125	9.1875	-17.75	-10.25	-26.3125	1.46875	3.09375	8.71875	-6.65625	-34.5	22.25	4.15625		0.01204
0.01208	-21.7812	-31.4062	-12.1562	-17.1875	7.96875	-8.09375	-5.1875	11.8125	11.9375	-2.375	3.6875	27.4062	0.01208	29.4375	-0.40625	7.875	19.8125	-12.4062	-9.59375	-4.4375	13.5312	-11.25	-16.5625	14.7812	28.25	7.9375	-2.125	-19.9062	-25.7812	19.875	13.75	-10.4688	6.53125	1.5	0.01206	-13.375	-15.625	-5.3125	-2	22	-28.5625	-0.8125	-15.875	9.09375	-10.9688	29.1875	-20.2188		0.01206
0.0121	-23.4688	-24.6875	-16.5625	-5.1875	22.8438	3.53125	20.1875	-14.5938	-5.71875	4.34375	3.28125	-25.5	0.0121	-7.0625	-28.0625	16.75	-29.8125	-1.40625	24.2188	-6.8125	-34.6875	-12.125	-12.7812	41.0312	0.21875	17.5312	5.96875	-12.5	2.0625	-18.2188	2.28125	-26.625	-13.625	-2.5625	0.01208	3.40625	-2.5625	15.3438	31.9062	34.3438	1.21875	-16.9688	2.84375	-3.84375	-3.40625	-22.7188	11.9688		0.01208
0.01212	-33.2812	0.75	-1.0625	-6.3125	12.5938	-7.625	-5.375	-9.59375	-7.53125	3.4375	-30.625	-28.9375	0.01212	-24.9062	11.5	24.4375	-11.875	-27.3438	-19.5312	4.09375	-23.375	-5.6875	41.875	-31.5938	-34.2812	-17.3438	-20.5938	-5.75	14	-8.3125	11.9062	53.5312	-6.25	-17.5938	0.0121	-29.75	-1.875	-23.4375	-17.7812	-13.5312	41.375	-1.1875	1.25	-10.5625	-6.3125	-25.125	17.9688		0.0121
0.01214	24	-12.75	-6.3125	3.53125	-35	-28.7812	-2.09375	1.1875	0.125	21.6875	2.65625	23.4688	0.01214	33.6562	0.65625	1.96875	44.75	-3.09375	-3.0625	3.65625	8.40625	-8.1875	-12.8125	-2.96875	-16.25	-10.6562	-15.3125	-10.3125	-32.5	18.9062	-25.4375	23.0625	20.6875	-21.2812	0.01212	-4.1875	-24.125	-27.5	-15.9062	-1.78125	-15.25	-24.2188	-18.3438	16.875	2.84375	-58.7812	-13.4688		0.01212
0.01216	8.71875	-25.7188	-28.7188	-5.34375	19.1562	0.40625	5.53125	-18	-6.21875	-7.625	20.9062	-2.78125	0.01216	-24.25	-18.2188	3.5625	11.375	-6.34375	24.6562	-0.21875	3	25.625	-7.5	33.7812	19.5312	16.9688	4.90625	-25.2812	12.8438	-6.5	16.9688	-28.9062	-7.9375	3.625	0.01214	2.15625	-25.4062	17.5625	-6.96875	31.625	-22.0625	8.6875	-8.625	-21.375	-9.90625	-35.9062	-15.0938		0.01214
0.01218	-15.3438	-17.9688	4.21875	-16.9688	-3.65625	-21.1875	-17.8125	2.71875	15.875	-20.8438	-41.0938	-4.15625	0.01218	-45.0938	6.71875	12.8125	15.7188	-2.84375	-5.3125	-4.90625	-6.5	-25.4062	-31.3438	-36.875	-37.4375	-9.25	-11.4688	-6.8125	7.84375	-33.375	13.875	43.6875	-6.71875	-9.21875	0.01216	-7.59375	20.9062	-3.03125	10.2812	-12.8438	22.8438	11.7188	11.3438	-13.0312	-3.625	13.9688	12.0312		0.01216
0.0122	-11.1562	2.6875	19.9375	-17.7812	-21.9688	-36.1562	-7.09375	5.15625	0.96875	-10.4062	9.1875	9.8125	0.0122	36.0938	1.90625	-21.2812	37.1562	-22.5	-13.4062	-10.1875	38.9062	-39.75	-15.1562	4.78125	-26.5312	-52.4688	-32.5625	21.6875	-27.0312	23.2188	-34.875	20.1562	-9.84375	-22.1875	0.01218	-8.875	37.9375	-4.875	8.5625	-39.9062	-31.125	-32.625	-18.0312	31.1562	-3.375	14.7188	27.125		0.01218
0.01222	4.21875	13.6562	-42.9688	10.125	-7.78125	3.40625	2.5625	-36.75	-6.59375	-20.25	12.1562	-4.71875	0.01222	-2.34375	11.8125	8.6875	13.125	6.40625	14.9062	-13.125	3.21875	11.1562	-20.25	28.625	19.2188	-1.3125	20.6875	19	-23.9062	-23.5625	-13.7812	-38	6.9375	-0.25	0.0122	-19.0625	-57.8438	4.78125	19.3438	25.6875	-26.5938	24.4375	-5.34375	-8.5625	-10.5625	13.0938	-21.7188		0.0122
0.01224	-14.7812	-5.875	-2.46875	30.1875	-7.875	-25.0625	-9.5	9.78125	-14.9688	3.40625	-15.6875	9.21875	0.01224	-46.4062	1.90625	8.78125	-7.21875	-21	-5.71875	-15.625	-16.7188	-21.0625	7.96875	-43	3.25	4.9375	2.96875	11.1875	19.2812	-16.7812	-4.40625	16.0312	-34.1875	10.4062	0.01222	12.3438	-9.8125	-11.4062	-22.2812	9.65625	21.5938	32.3438	35.2188	17.4688	-18.6875	-45.5312	-7.4375		0.01222
0.01226	3.96875	2.0625	23.3125	-21.5938	14.7812	-10.5625	-33.5	-3.78125	-11.0312	-11.5	-6.3125	3.78125	0.01226	4.8125	-20.8125	11.8438	22.4688	-12.7188	-19.0625	0.0625	16.4062	-19.5	17.9375	-16.5312	-8.125	-20.0625	7.21875	-17.7812	-3.53125	8.34375	-1.375	17.4375	-11.125	-3.6875	0.01224	19.75	36.6562	11	-46.4062	-26.3125	-24.7188	-39.3125	7.875	-24.4062	5.15625	7.84375	-31.1562		0.01224
0.01228	-36.9688	-9.53125	-9.28125	17.1875	-30.9688	15.1875	-2.375	-27.875	-15	-31.0938	-7.4375	-18.4688	0.01228	10.6562	11.7812	-27.375	2.65625	12.625	36.25	5.53125	-1.25	15.1875	-18.4688	10.8125	14.1562	1.59375	-0.84375	-13.5312	-16.6875	-5.8125	-15.75	-25.7812	21.9688	-3.75	0.01226	-8.84375	-5.53125	-17.9688	-23.25	37.0938	-14.1562	-10.9688	-29.4062	-34.4062	4.59375	36.7812	10.3438		0.01226
0.0123	-40.5938	20.8125	20.3438	2.3125	41.6562	-25	-16.7188	-20.9375	18.375	-10.75	1.21875	7.75	0.0123	-74.1562	19.875	-22.1562	-26.9688	0.15625	-15.875	5.21875	-11.7812	-47.1562	8.46875	-25.625	-16.3438	14.5312	-0.28125	12.4688	16.0312	-36.125	2.1875	-7.25	-6.9375	-23.25	0.01228	-9.78125	-51.9688	-5.71875	32.2812	-38.5625	9.59375	28.4375	1.125	3.71875	-23.3125	-7.875	-1.90625		0.01228
0.01232	-3.21875	7.71875	11.2812	-48.9688	26.3438	-7.90625	-8	11.1875	-11.125	-20.6562	3.96875	-4.1875	0.01232	-10.75	-30	41.125	9.21875	-7.25	-44.0938	-13.8125	17.5312	-27.5	-0.78125	-27.5625	-24.6562	-30.375	-4.1875	10.4062	10.125	-3.375	-9.96875	57.6875	-8.40625	-16.1875	0.0123	-6.59375	36.5625	5.8125	-7.25	-33.75	-7.875	8.3125	-7.9375	16.875	14.2188	-4.0625	6.59375		0.0123
0.01234	21.5312	-10.5312	-44.0625	14.4688	-29.375	24.5	3.8125	-31.6562	-28.7812	0.34375	-7.8125	0.125	0.01234	37.9688	-5	-27.5938	-18.0938	13.8125	9.84375	-21.9688	-19.4062	8.75	-12.125	20.9062	16	-29.0938	1.75	-16	-36.625	10.7812	-13	-26.5	11.4688	-21.1562	0.01232	-49.2188	17.5625	19.4375	-12.7812	-6.9375	-20.3438	-10	-15.2812	-26.4688	-1.6875	-13.4062	35.0938		0.01232
0.01236	5.875	-16.3125	5.25	49.0938	-17.6562	-3.03125	-9.4375	-22.7188	-11.875	14.9062	4.46875	14.375	0.01236	-46.8125	12.0312	-33.9062	-8.34375	-7.90625	0.1875	-9.21875	-5.625	-18.875	5.65625	2.5625	9.46875	22.8125	1.25	-14.1562	14.2188	-2.03125	10.9375	-1.4375	-6.96875	0.96875	0.01234	3.75	-34.125	4.4375	43.9062	17.6562	10.125	6.75	-5.90625	-1.5	-16.8438	9.90625	-35.3125		0.01234
0.01238	-32.9688	-17.7812	21.375	-4.0625	-7.46875	-20.625	-9.1875	0.46875	-24.7188	17.125	-12.9688	8.53125	0.01238	18.3438	-11.5625	-9.5625	13.0625	-3.84375	-21.4688	2.6875	-3.375	1.125	12.875	-16.125	-41.7188	-27	21.75	-12.2812	3.4375	-8.71875	11.0625	12.4062	-12.4062	-5.71875	0.01236	38.75	7.65625	-1.46875	-27.7188	1.53125	-1.40625	-4.84375	-5.375	23.1875	1.375	-13.3125	-33.75		0.01236
0.0124	40.4688	24.5312	-47.7812	-26.3125	-17.2188	5.3125	6.78125	6.03125	-29.875	-11.9062	-12.25	-19.1562	0.0124	32.5938	-20.1875	13.9688	3.5625	22.2812	14.4688	-16	-8.8125	24.2188	-30.1562	9.34375	2.84375	-33.4688	42.5938	-30.7812	-19.4062	18.1875	7.6875	-15.25	-2.53125	-5.3125	0.01238	-9.59375	2.8125	-5.9375	3	-19.8438	-28.25	0.1875	32	-13.6875	9.21875	-0.71875	17.625		0.01238
0.01242	9.5625	-6.59375	-49.1562	3.75	-6.28125	-12.625	-8.84375	-23.8125	26.9688	22.0938	-17.5	8.96875	0.01242	-28.875	22.3125	-12.125	0	-1.0625	-26.3438	23.7188	-37.875	3.34375	-1.625	-14.0625	22.875	-11.7812	6.34375	-13.3438	-23.7812	-37.375	-18	-20.9062	-1.53125	12.7188	0.0124	-18.1875	1.0625	-13.2812	23	-36.5938	14.3125	8.40625	-6.1875	8.875	-14.4375	0.25	14.1562		0.0124
0.01244	-20.1562	-3.53125	17.7812	14.8125	34.6562	6.6875	-36.9688	-1.40625	9.9375	46.9062	-14.1875	1.03125	0.01244	-5.0625	-1.46875	-25.4375	-19.8125	-5.15625	-17.5938	12.2188	11.2188	-22.8125	-8.875	-9.28125	-38.1562	-10.625	-6.09375	8.65625	5.65625	-14.7188	-34.3438	-2.4375	-47.5938	-2.28125	0.01242	15.5625	-3.5625	4.21875	-42.25	-10.25	10.625	10.2188	-8	8.21875	0.125	-2.28125	-25.6875		0.01242
0.01246	1.75	2.9375	12.875	11.5	-13.1875	-22.2188	15.125	16.625	-7.5	-48.5	-4.625	-17.7812	0.01246	21.8125	-46	17.0938	-27.0938	5.8125	-11.0938	-0.28125	2.625	9.78125	-56.625	7.5625	-7.78125	-27.5312	6.21875	-16.9062	-24.9062	27.375	14.9688	-5.625	3.78125	-25.5625	0.01244	-20.125	-20.5625	18.8438	23.3438	5.6875	-25.9688	9.53125	8.59375	-18.6562	24.375	3.90625	0.09375		0.01244
0.01248	19.375	6.4375	-15.5312	-7.6875	-24.4375	-19.0625	-2.34375	-0.84375	-10.25	-24.0625	-5.40625	-6.4375	0.01248	-18.4375	1.34375	-29.9062	-13.4062	-23.125	-0.3125	34.5312	-14.8125	7.03125	-2.65625	-2.25	-7.6875	-13.25	7.9375	-2.8125	-13.2812	-3.40625	-12.6875	-56.5312	-3.65625	-18.5625	0.01246	-14.0312	24.7812	-31.125	-4.59375	-7.15625	-3.4375	-25.1875	11.3125	-23.25	-18.25	-17.125	-3.90625		0.01246
0.0125	-15.25	-9	-4.09375	-25.3438	7.875	25.125	6.5625	-15.0312	-10.7812	15.9688	-35.375	12.7812	0.0125	-36.2188	1.3125	7.0625	8.96875	-3.6875	10.875	7.375	-11.25	-9	-14.8125	-12.0625	-0.5	30.3125	-18.4062	26.1875	12.25	-18.9375	-2.8125	-24.8125	-26.1875	42.8125	0.01248	12.875	-5.21875	-11.625	-22.4688	-12.6875	12.125	-8.46875	-19.0938	-14.2188	-19.8125	-27.8438	-6.6875		0.01248
0.01252	-3.65625	-2	-11.7812	-8.21875	-5.40625	24.7812	-27.125	38.2188	-21.9688	-4.25	-7.40625	-22.4062	0.01252	23.0625	-21.8438	5.78125	-24.8125	12.0625	-24.5938	-15.375	12.5625	6.3125	21.0625	4.90625	-3.6875	-6.40625	1.46875	-14.7812	-19	25	-2.71875	24	-5.625	-7.9375	0.0125	-0.75	-23.3125	-8	8.0625	8.78125	-4.84375	19.0938	14.7812	12.0938	10.7812	12.375	-9.96875		0.0125
0.01254	21.1875	-12.9062	-3.28125	12.9688	2.0625	-7.03125	0.03125	-28.0312	10.4375	-12.5	-10.875	-56.8438	0.01254	-5.53125	-24	-18.9688	-30.4375	-23.2812	-58.1875	5.3125	-9.5625	11.75	-7.4375	0.09375	-6.46875	-2.3125	12.1875	-27.375	9.875	11.875	1.9375	-36	-6.03125	-22.7812	0.01252	-0.75	-9.4375	-20.3125	-12.5938	14.2812	10.3125	-19.125	42.125	-17.25	-9.03125	15.1875	-10.25		0.01252
0.01256	-8.3125	9.09375	-8	-18.6562	-14.125	-15.7812	23.7812	-29.875	-11	-15.5625	-28.6875	-6.9375	0.01256	10.3438	16.1875	-8.71875	-4.90625	-28.75	-16.2812	20.7812	6.1875	-42.6562	21.375	-40.8438	12.1875	27.8125	-17.5312	42.125	16.9062	-37.7188	-11	-6.25	2.96875	42.1562	0.01254	13.125	-18.8438	-15.0312	17.0625	-7.03125	15.5938	-13.125	-8.5625	4.0625	-27.125	-35.0312	-18.3125		0.01254
0.01258	-27.125	-20.5938	-14.75	-0.34375	10.0938	-10.2812	0.59375	22.125	-39.25	10.5312	-19.5938	-9.09375	0.01258	32.8438	-29.375	16.4375	-31.375	42.5625	6.5625	-11.375	20.1875	-11.5938	10.2812	12.4375	-13.6875	-7.34375	15.9375	-2.25	-41.125	-42.1875	6.96875	36.2188	25.1875	0.4375	0.01256	9.875	-3.78125	18.5312	-5.90625	-2.03125	-0.59375	-21.25	-30.9062	21.125	21.9375	-2.28125	-16.0938		0.01256
0.0126	-14.2188	-8.0625	-24.5938	-18.7812	8.96875	-40.2812	-8.59375	5.21875	10.0312	-19.2812	6.15625	-22.8438	0.0126	23.6562	-21.4688	2.28125	-20.7812	4.46875	11.0938	12.875	-37.875	8.21875	-32.6875	7.65625	-6.1875	1.65625	20.7188	-33.1875	0.34375	-27.875	22.1562	-7.8125	34.75	-40.1562	0.01258	-8.5	19.5625	-5.78125	39.5	-5.21875	-3.125	10.9375	27.5312	-12.1875	-5.46875	16.125	21.375		0.01258
0.01262	-50.4688	-14.5625	8.15625	11.0938	-11.75	4.90625	23.1875	10.5	17.9688	13.4375	-21.9375	15.9062	0.01262	12.875	25.0312	-37.875	11.4375	-18.0312	14.625	23	21.375	-17.75	5.59375	-32.0625	3.4375	-11.1875	-29.125	12.25	16.2188	16	-44.0312	-36.5625	3.375	25.6875	0.0126	-7.75	16.0625	-11.75	-38.9062	-16	-20.0625	-2.59375	-16	5.125	2.75	-21.0312	16.2188		0.0126
0.01264	7.875	17.6562	0.71875	-29.2812	-29.0938	26.0625	29.5625	21.9688	-20	-5.65625	12.3438	25.7188	0.01264	31.4688	-22.8125	-6.5625	-1.5625	38.0625	22.5938	-11.1562	12.125	-40	-10.3125	38.9688	-18.375	-7.96875	-16	21.6562	-15.1562	13.7188	16.875	23.1562	-7.375	-6.90625	0.01262	-10.5938	-36	36.9062	-24.1875	-9.875	-15.3438	-8.625	-20.7812	-24.9688	15.0938	-15.9688	-8.5		0.01262
0.01266	-11.875	-38.5	-10.3438	-3.75	-11.9375	-54.1875	-25.5	13.9688	-47.25	-23.7188	5.1875	-9.65625	0.01266	11.4375	13.1562	3.125	-25.8125	17.3438	-4.6875	3.1875	-23.8125	4.53125	-25.8438	14.2188	7.28125	-6.1875	-12.9375	-14.6875	-20.3438	-43.3125	14.4062	-8.25	12.0625	-34.25	0.01264	-7.5625	-36.25	-6.34375	-2.375	16.5312	18.0625	-29.625	18.0625	-1.125	-7.90625	15.375	43.375		0.01264
0.01268	-37.1875	-12.0938	6.1875	-18.5625	8.625	-25.75	-36.125	6.4375	14.75	7.40625	7.65625	40.7188	0.01268	-1.78125	10.8125	-14.7812	22	-17.5625	-9.1875	49.375	-8.09375	8.65625	-11.25	-21.75	-18.4062	1.75	-29.7812	-12.625	33.9688	11.125	-28.75	-4.78125	-40.0625	2.09375	0.01266	10.5938	38.4688	-6.75	-3.84375	-14.2188	14.9375	-7.28125	-5.40625	-0.96875	-14.8438	-1.28125	4.65625		0.01266
0.0127	5.21875	5.3125	-0.25	-17.3125	-4.375	0.65625	20.125	-13.2188	-1.21875	5.0625	-40	29.1875	0.0127	14.4688	-33.625	-6.8125	-13.3438	27.5625	17.2188	-7.25	16.7188	-15.9375	-11.4688	3.90625	2.75	-7.59375	-23.3125	26.875	-19.125	37.4688	-11.7812	-11.2188	-21.1875	-6.0625	0.01268	-6.125	-7.46875	16.2188	2.46875	5.78125	-29	14.1875	-6.28125	-14.5938	-4.5	7.78125	-10.625		0.01268
0.01272	13.7188	-15.375	-31.375	7.5	-10.5312	-2.8125	-5.625	-28.8438	2.25	-24.6562	11.0312	-22.8438	0.01272	-19.125	-15.4375	-21	-5.40625	15.4375	-7.375	-34.125	-5.1875	-6.3125	-16.375	1	6.9375	-32.9688	-16.3125	-31.0625	-15.0938	5.96875	9.96875	-31.2188	29.1562	-35.125	0.0127	26.3125	-28.7812	-1.125	-4	9.34375	-22.8125	-3.15625	-9.5625	16.1875	-13.0625	-20.0625	2.125		0.0127
0.01274	-7.5625	25.3438	9.59375	9.625	-12.8125	-29.9062	-50.2188	3.5	10.4062	0.75	5.59375	12.7188	0.01274	-1.625	37.5	-18.875	17.7188	-40.7188	-7.5	-40.7188	-16.8125	-12.7188	8.03125	-28.8125	10.0938	1.625	-15.625	-4.15625	27.2188	-16.625	9.40625	-25.4688	-23.4688	-2.15625	0.01272	-13.7812	8.65625	-32.7812	-15.6562	-31.8125	16.5	3.0625	-17	-12.0625	0.34375	-25.6875	-41.8125		0.01272
0.01276	-4.3125	1.09375	-0.625	-2.875	-13	0.78125	-17.625	18.9375	-25.8438	-6.78125	-22.7188	46.1875	0.01276	14.8125	25.5312	-18.1562	-0.6875	13.0938	-29.0625	-36.875	46.7812	-6.53125	2.21875	10.6562	23.5312	-1.25	-13.125	29.3438	4.84375	3.21875	-30.3438	19	-39.625	0.46875	0.01274	-28.0312	-0.53125	-12.0625	-20.7812	9.28125	-17.4375	-16.4375	-17	21.4375	-8.375	-26.3125	14.625		0.01274
0.01278	27.625	0.375	-10.3125	11.0938	-12.5	5.9375	-8.84375	-28.0938	1.53125	-8.46875	-1.15625	-16.5312	0.01278	-30.2188	2.4375	0.90625	-48	19.875	29.2188	-26.9688	-24.9062	7.09375	7.5625	42.2812	9.3125	3.25	20.9688	-26.5	-54.6875	1.34375	-18.9062	35.875	34.5312	-36.4688	0.01276	-15.1562	-18.3438	8.8125	-13.7188	20.1562	-17.0938	5.21875	15.75	-11.4688	-8.15625	27.0938	1.25		0.01276
0.0128	-20.4688	-11.0312	14.625	10.6875	-1.40625	-15.875	-12	-2.75	2.9375	-19.4688	4.90625	-29.0625	0.0128	-36.7812	27.0938	21.5938	-17.3438	-23.1875	-26.5312	-13.0625	-20.3438	-21.0938	-6.4375	-32.8438	20.0938	-13.625	-0.5	-18.4062	-3.90625	-37.7812	13.9062	-38.0625	0.25	-14.8438	0.01278	26.5625	32.8438	-30.3125	19.5938	-5.375	21.6875	10.5312	-9.3125	4.34375	1.375	-1.71875	-17.0938		0.01278
0.01282	-9.71875	-18.0625	0.46875	-19.4375	1.15625	15.4062	7.40625	-12.375	-24	-8.5	22	33.9688	0.01282	10.7812	-1.5625	-5.46875	2.375	-17.875	-28.9375	31.6562	14.1875	-10.4062	-3.46875	-40.2812	-15.3125	21.5938	-31.0312	17.4062	-2.5	-15.5938	-13.0938	1.53125	-34.6562	36.0625	0.0128	-29.6875	-14.5	-12.125	-29.0625	-37.6875	5.21875	3	17.3438	10.5312	11.9375	5.21875	-5.1875		0.0128
0.01284	31.4375	27.0625	-21	-2.9375	-11.2188	35.3438	-1.46875	-9.25	-3.40625	-2.65625	-24.25	-15	0.01284	-17.25	-36.6875	0.84375	-9.625	33.375	13.6562	-13.3438	7.125	0.9375	-7.78125	11.5625	11.75	-37.2812	23.7188	24.4688	-7.375	4.28125	-8.21875	36.7188	-8.125	-33.7812	0.01282	-19.8125	14.75	9.96875	-9.25	20.5312	-11.0625	16.4062	-22.3438	-45.0625	-8.71875	26.0312	36.375		0.01282
0.01286	-40.7812	4.6875	1.96875	-2.0625	1.21875	-31.4375	-25.5625	-36.0938	-10.0938	21.9062	-12.0938	-37.9062	0.01286	-50.625	-5.5	-29.4688	-7.59375	3.96875	-13.1562	5.1875	-16.625	-0.5	8.65625	-25.8438	18.9062	-18.9688	9.15625	-33.2812	11.8438	-41.5938	-18.3125	-26.1562	37.625	-12.75	0.01284	-3.53125	11.3125	38.125	0.53125	0.90625	19.8438	-23.1562	-17.2188	10.3438	-19.125	-32.1875	-23.3438		0.01284
0.01288	-8.375	-5.21875	7.3125	3.3125	-2.90625	-7.875	-8.875	-8.78125	-21.5625	9.53125	16.4375	-9.96875	0.01288	-16.875	-15.125	-6.375	4.8125	5.5	-19.6562	-6.46875	-11.5625	10.8125	-31.625	-3.0625	-22.25	10.9062	-31.125	17.5312	18.4062	7.65625	19.125	-40.2188	-52.7812	44.3125	0.01286	-20.375	0	5.09375	2.46875	-25	-29.9375	-17.4688	-5.1875	1.9375	14.7812	-8.78125	-19.4688		0.01286
0.0129	7.21875	-1.84375	-55.8125	10.3125	-5.71875	33.4062	22.7188	-15.8125	18.7812	-9.96875	-5.1875	2.78125	0.0129	-3.5	-13.7812	19.125	-18.5	13.9688	-2.21875	-19.8438	0	-1.15625	-17.5625	31.0625	46.5938	-23.5312	0.0625	-10.1562	-4.28125	-5.46875	14.75	17.875	-3.5625	-3	0.01288	-7.5625	-1.09375	-9.09375	24.875	-10.25	-17.8125	0.1875	-3.8125	-20.7812	19.7188	-5.28125	20.0625		0.01288
0.01292	-9.5625	-2.375	-24.8125	-11.5938	-9.4375	22.7812	-1.96875	-6.375	9.21875	42.5938	-22.6875	16.625	0.01292	-33.4062	2.75	0.09375	14.3438	-31.125	11.125	-19.0312	-49.9062	-25.5625	31.8125	-4.375	-15.9688	-11.8125	28.7188	-44.875	-15.875	19.125	-18.1875	0.0625	31.2812	-19.8125	0.0129	40.9688	-0.34375	-14.6562	26.8125	-14.0938	13.5312	8.21875	-7.25	6.5	-14.8438	-4.78125	-8.96875		0.0129
0.01294	-7.125	-21.125	27.2188	-17.5	2.875	7.9375	2.5	24	-61.625	-7.03125	1.1875	1.53125	0.01294	0.34375	-21.3125	-25.875	5.4375	-49.2812	-19.0625	7.0625	-13.6562	13.25	-13.7188	-35.625	-36.4375	1.75	-27.8438	3.15625	-12.8438	13.5625	-11.2188	-22.0625	-29.4062	18.625	0.01292	12.25	-10.9062	19.25	2.4375	8.1875	-20.8125	-8.78125	-11	-16.5625	21.6562	-7.90625	10.7188		0.01292
0.01296	-9	-4.5625	-35.5312	-7.71875	-13.1562	17.5625	5.84375	4.3125	4.84375	-38.4688	13.875	-10.5938	0.01296	27.4688	-21.2188	-0.5	-43.0312	0.03125	-5.78125	-13.5312	4.90625	37.4688	-13.5625	19.5	-14.2812	-11.0938	-5.21875	3.5625	-24.3438	-11.875	21.0625	-7.03125	-14.5312	-9.46875	0.01294	-34.5312	-1.40625	0.78125	10.7188	-0.46875	-16.0312	-39.5938	9.09375	6.78125	15.8438	3.15625	-13.3125		0.01294
0.01298	14.5625	0.46875	-19	6.34375	-14.7812	0.1875	-27.125	-2	17.5938	20.1875	-6.4375	-13.5938	0.01298	-4.46875	15.5	-16.75	-13.2812	4.71875	15.3125	-38	-17.4062	-17.875	9.65625	12.5312	-16.4062	-19.5312	9.25	-15.5938	-1.21875	-10.0625	4.28125	31.1562	2.4375	-24.2188	0.01296	17.1562	-13.2188	-26.5312	15.25	-14.3438	4.46875	13.7812	1.3125	-20.2812	-32.4688	2.8125	-9.03125		0.01296
0.013	-4.46875	-27.1562	30.4375	-19.7812	-10.7812	-5.1875	4.59375	4.96875	1.78125	19.4062	-18.9062	3.09375	0.013	27	3.5	-0.625	-14.9062	-42.9375	-30.9062	4.40625	-5.28125	-21.6562	-3.25	-43.9688	-8.8125	28.4375	-60.9375	-14.375	11.4688	-13.7812	-31.25	-20.125	-11.25	32.375	0.01298	-4.4375	21.625	11.875	-26.875	-12.4688	12.4688	-43.4062	-26.5312	39.5625	-9.25	-25.1875	-22.1875		0.01298
0.01302	-12.2812	-19.3438	-17.7188	2.15625	-12.75	4.40625	19.125	2.65625	-15.8125	-36.7812	0.09375	-45.5938	0.01302	0.1875	-36.125	7.59375	-8.75	-5.0625	2.21875	-24.0938	21.5625	7.6875	-41.25	17.1875	0.3125	0.78125	-19.5938	0.96875	-21	8.84375	11.1875	-17.3438	-20	35.5	0.013	-4.125	-0.84375	-0.28125	32.9375	13.3438	-9.1875	-3.09375	16.7812	7.96875	30.9062	22.8125	11.9062		0.013
0.01304	-2.1875	13.8438	-15.5312	-10.4688	-12.125	-28.9062	-24.4062	-21.875	4.5625	-0.53125	-45.1562	-16.1875	0.01304	-37.5312	-1.28125	-13.2812	-7.0625	12.625	-0.21875	1.09375	-17.1875	3.5	-14.6562	18.6875	-13.9688	-21.3125	10.4062	-17.9688	-0.9375	-13.5	3.75	-5.40625	25.75	-38.8438	0.01302	30.3438	7.375	-6.96875	1.96875	-11.1562	17.5	30.5	-2.625	-27.6562	-24.4062	-16.5938	-7.09375		0.01302
0.01306	-3.46875	-4.71875	42.625	7.21875	-19.3125	-3.90625	17.2812	21.6562	3.125	21.4375	-22.9062	11.7812	0.01306	-4.84375	0.9375	23	7.84375	-39.5	-19.4688	13.9062	-6.65625	-20.9375	11.9375	-39.4062	-5.125	4.21875	-6.84375	5.09375	-3.90625	-6.71875	-20.6875	-24.6562	12.9062	16.3125	0.01304	-22.0312	1.21875	-2.46875	-12.3438	14.0625	-21.0625	-9.65625	-19.0312	-12.4062	-36.6875	-14.5938	10.4688		0.01304
0.01308	-10.7812	17.4688	-1.96875	2.34375	2.65625	-20.1562	14.4688	-31.5	-17.5	-34.1562	9.375	-20.375	0.01308	22.3125	-7.65625	-0.625	-1.03125	1.125	-15.25	-16	23.875	-12.2188	15.2188	-11.625	2.9375	-15.3125	-16.5312	2.15625	-2.21875	15.0625	16.0625	-12.9375	-15.7812	10.4688	0.01306	-53.2812	-18.9062	-11.5625	-8.5	19.6562	20.875	1.53125	7.34375	4.65625	-21.5312	5.84375	20.4688		0.01306
0.0131	-13.75	-2.4375	-4.03125	-1.78125	-0.34375	-17	-20.4688	-10.4375	-16.7812	-10.5312	4.875	-1.65625	0.0131	-32.0625	-11.6562	-11.8125	-10.7188	6.4375	0.125	18.4062	26.5625	-8.0625	-12.5	19.75	15.2188	8.78125	20.3438	-30.5	-6.09375	11.25	5.1875	7.90625	29.875	-34.25	0.01308	16.6562	-3.40625	-18.5625	-12.2188	-13.5938	-8.6875	29.0625	29.2812	28.625	24.3438	21.3125	-38.5		0.01308
0.01312	-0.25	-25.0625	17.0938	-9.28125	-10.1875	-12.1875	4.28125	-18.9375	-24.7812	5.0625	-24.8125	-12.5312	0.01312	-58.7812	2.0625	-4.21875	11.875	-28.6562	-6.8125	22.9062	-22.3438	-30.125	27.625	-21.2812	18.1875	13.5625	-24.5	41.9062	28.4375	-31.1875	-22.1875	-18.625	4.5625	14.0938	0.0131	-3.6875	9.9375	-9.34375	-14.8438	-19.5938	-14.625	-12.8438	-33.6875	8.90625	-9.84375	-11.125	10.625		0.0131
0.01314	-16	-16.9375	9.1875	2.71875	-23.1875	2.46875	4.6875	-7.65625	-6.625	-36.1875	24.7188	-9.75	0.01314	50.6562	-20.0625	5.1875	-7.8125	-20.625	-17.8438	-3.03125	-3.5	-20.2812	-33.8438	-13.25	-12.7812	-14.0625	-25.375	26.1562	-6.65625	-17.2188	14.0625	4.8125	-5.9375	4.15625	0.01312	-7.65625	-35.8438	0.875	-19.25	27.7812	2.40625	-16.25	1.375	14.1562	-13	-11.625	33.1562		0.01312
0.01316	-13	9.46875	-9.3125	5.84375	1.6875	-37.625	-29.7188	-6.4375	8.34375	12.5938	-5.25	4.9375	0.01316	11.4688	22.0312	-32.4688	-11.5625	12.3125	7.96875	-16.5938	7.125	26.5938	-17	18.7812	-20.5625	3.5625	12.5625	-29	-20.8125	22.9375	21.8125	9.3125	-2.71875	1.21875	0.01314	5.59375	-4.125	-7.46875	23.5625	5.59375	1.3125	10.4688	2.875	5.625	-3.125	24.0312	-22.5938		0.01314
0.01318	-15.4062	-7.84375	-12	-17.75	-4	-17.3125	-5.84375	-9.78125	-12.6875	18.4688	-29.4688	34.5938	0.01318	-28.875	17.6875	-11.75	15.3438	-19.3125	-4.25	23.9688	-10.25	-19.5312	32.2188	-12.5312	-12.4375	7.0625	0.75	-17.3438	0.0625	-23.375	-24.0938	-10.5625	25.25	-25.5312	0.01316	0.03125	4.78125	-16.3438	2.90625	-24.5625	1.53125	-23.0312	-20.8125	-10.9062	-3.21875	-38.9375	3.40625		0.01316
0.0132	-11.8438	-20	0.375	-18.2812	-3.8125	23.125	23.625	-21	11.3438	-19.6562	-8	4.8125	0.0132	10.9062	-26.0938	-6.25	-8.8125	-4.9375	-16.4688	-18.375	2.9375	-23.8438	-26.0312	-13.1562	-23.3438	-16.2188	-20.0625	-27.9688	-2.34375	5.71875	-12.6875	-13.8438	-10.1875	-6.1875	0.01318	-11.5625	-1.0625	-1	-27.6562	-6.09375	-2.28125	8.1875	-9.875	0.21875	14.3438	-18.625	15.7188		0.01318
0.01322	-21.5938	11.8438	-4.4375	12.2812	-7.5625	-17.8438	-20.1875	4.375	-30.25	-38.4375	20.5625	-13.0312	0.01322	-0.90625	50.3125	-28.4062	6.5625	25.5938	12.6562	-22.5625	-5.03125	3.90625	-30.4688	9.34375	-3.8125	-32.8125	12.6875	-0.3125	-4	40.8125	24.8438	21.0938	-36.8438	-1	0.0132	28.5	-24.9062	-18.1875	3.21875	19.9375	-15	-1	-8.9375	-8.75	-15.7812	7.96875	-1.34375		0.0132
0.01324	-4.40625	-7.125	-7.8125	-5.8125	15.75	-4.5625	-45.0938	0.03125	-22.3438	26.4688	33.9375	23.2188	0.01324	-7.5625	37.3438	-14.4062	7.75	-22.6875	12.625	-3.03125	-10.6875	-15.9062	15.1875	-17.8438	-6.0625	10.875	8.8125	15.0938	-20.6562	-18.2812	-41.1562	2.15625	5.21875	-28.1562	0.01322	22.7812	-25.375	27.7188	9.1875	-28.5312	-18.375	-14.4375	-3.5625	4.09375	-12.4688	-10.375	-30.3438		0.01322
0.01326	45.2188	16	-40.7812	-11.2812	-20	-11.125	0.90625	11.2188	14.5625	25.625	10.7812	-13.7188	0.01326	-16.1875	-0.75	6.4375	-15.5625	14.75	-35.3125	-43.3438	14.3438	-16.2812	-7.96875	1.5625	-11.8438	-13.125	-30.3125	45.2188	-27.9688	-15.0312	-14.4062	-22.4375	-16.75	-8.65625	0.01324	-30.4062	16	12	-8.15625	-3.03125	-34.875	2.1875	-1.4375	12.25	-10	11.2188	-1.59375		0.01324
0.01328	22.5	-6.5	-8.8125	24.4688	-6.375	-35.4375	-38.1875	-16.4062	1.21875	-35.625	-55.3125	-12.25	0.01328	-33.0625	27.7812	-10.9375	10.1875	19.2188	21.6875	-13.1562	-20.625	14.7188	-37.5312	36.8438	-18.7812	-41.6562	-5.09375	10.75	-38.125	12.5312	-10.8438	-10.125	-3.28125	-28.25	0.01326	9.65625	0	-14.8125	10.2812	-7.78125	-21.625	4.40625	19.9062	-32.125	-2.25	-8.15625	-4.21875		0.01326
0.0133	-10.5938	5.59375	27.2812	0.4375	28.3125	-19.7812	-32.1562	-6.875	-23.9062	-8.96875	8.6875	2.40625	0.0133	-20.625	14.6875	-13.8125	4.4375	-1	30.75	24.5	4.59375	-0.53125	3.96875	-29.9688	-14.0625	1.96875	6.5	3.53125	-12.25	-1.96875	10	24.5625	0.84375	16.1562	0.01328	10.2188	6.59375	9.21875	-19.7812	-4.46875	49.1875	-7.53125	-5.71875	-30.0312	-10.0625	-4.6875	-23.5		0.01328
0.01332	-1.90625	34.1562	-3.375	-7.3125	-14.0312	36.4688	26.4375	-7.75	-4.4375	11.9688	35.9688	-3.75	0.01332	-6.53125	-31.7812	20.5	-32	-14.5	-53.1562	-16.3438	3.84375	-11.5	13.1875	-24.9062	1.90625	6.78125	-6.1875	22.0938	-10.4062	-54.0625	-30.7812	8.78125	-16.7188	4.09375	0.0133	-16.5	-11.5	-28.4062	-34.625	-6.9375	-9.125	-6.84375	-21.0938	7.21875	30.0938	-14.8438	23.0938		0.0133
0.01334	10.1875	21.75	-32	15.9062	-32.6562	-12.4375	20.4375	-16.9688	43.8438	-14.3125	-48	-29.625	0.01334	-3.71875	19.5	-32.9062	15.0938	-8.34375	-13	-28.1562	-9.40625	-10.8438	-38.7812	12.6875	-11.3125	-11.125	5.03125	20.0312	-7.09375	13.5	-13.5	-45.2812	-37.8438	-5.125	0.01332	-2.34375	1.96875	-4.71875	-2.25	14.125	-1.84375	-1.78125	-10.875	-9.40625	-28	-1	-18.125		0.01332
0.01336	-20.5938	21.625	25.4688	23.7188	19.7188	-10.5	-28.3125	-15.3125	3.5	7.96875	-35.4062	-22.6875	0.01336	-37.125	14.125	-8.21875	-22.9688	-12.0938	12.9062	5.8125	-20.4375	-0.6875	30.5938	-37.5	-12.1562	32.625	4.25	-3.125	-9.25	16.1562	25.375	-9.46875	14.4688	45.5625	0.01334	19.25	-17.6562	16.0938	-7.46875	22.7812	8.40625	3.8125	-8.4375	8.8125	7.40625	18.875	-20.4375		0.01334
0.01338	7.5625	13	0.21875	8.96875	13.9375	16.5938	6.40625	-5.3125	-23.25	-6.5	2.90625	-21.4062	0.01338	-0.25	-65.2812	24.75	-35.25	10.3125	-16.8125	-0.96875	4.28125	-11.4688	27.3438	-56.4688	7.96875	4.65625	10.6875	-16	22.375	-34.0625	-70.8438	-2.5	-7.8125	-18.4062	0.01336	4.21875	9.25	4.375	10.0312	-28.2188	-20.1875	-2.5625	6.84375	-2.625	2.9375	0.65625	-8.46875		0.01336
0.0134	20.4688	28.0625	-42.8125	15.7812	-13	13.4375	15.4688	20.2188	7.84375	2.9375	-20.5625	23.9688	0.0134	5.375	-26.75	24.5625	-18.75	-1	-15.4375	-24.4062	-55.7812	8.5625	-12.0625	-7.09375	5.03125	-24.7812	6.1875	-0.125	-4.90625	-5.96875	5.34375	16.1562	-23.6875	-3	0.01338	-19.5	15.5938	-14.5938	-12.8438	-51.8438	10.2812	-21.5938	12.2812	-48.3125	-2.59375	22.0625	10.375		0.01338
0.01342	-34.5	-5.15625	12.1562	-0.46875	-7	-5.0625	-9.71875	16.0938	-15.6562	-4.15625	33.1875	17.2188	0.01342	-8.78125	25.2188	-35.0312	6.15625	-4	-1.40625	5.65625	-73.25	1.40625	1.03125	44.2812	7.5625	15.1562	7.09375	-0.71875	-0.5625	12.2812	20.9375	-0.90625	12.9688	16.9688	0.0134	-4.71875	-24.4062	-2.6875	-2.96875	-10.625	25.9688	-16.9375	-6.0625	9.96875	4.90625	-11.375	6.21875		0.0134
0.01344	-33.5	-15.0938	-18.1875	6.53125	18.4062	-10.1562	20.0625	-21.3125	-28.25	-15.0312	25.9062	-20.6562	0.01344	19.9375	-8.03125	11.25	-7.5625	-4.8125	6.25	-7.21875	48.0312	2.34375	7.125	-2.96875	-7.125	21.0312	-20.5625	-23.4062	3.53125	-23.6875	-2.875	-24.5625	5.125	2.03125	0.01342	-26.5312	-18.4062	18.1875	21.6562	4.71875	-40.9688	3.84375	-39.6875	8.875	-1.46875	-10.2812	5.34375		0.01342
0.01346	14.0625	4.125	-31.1875	-1.53125	-6.15625	-2.9375	29.375	-6.1875	23.5	23.2188	-62.5625	-26.0312	0.01346	14.2188	-12.4062	27.7812	-16.2812	15.0938	1.40625	-15.375	0	-1.96875	-16.5312	-26.9688	-3.90625	-17.2188	-20.0938	-14.5	11.3438	6.25	6.15625	9.15625	-40.125	-16.7812	0.01344	2.40625	-9.46875	-27.0625	-0.125	-22.7188	-11.2812	-23.5	-6.71875	-6.4375	15.3438	3.5625	-7.375		0.01344
0.01348	-31.0938	-19.4062	0.53125	7.84375	-17.2188	-36.125	-26.125	-7.90625	22.4375	18.25	-11.2812	-4.625	0.01348	-7.8125	16.0938	-28.625	-10.6875	-29.2188	6.625	-2.78125	-6.03125	0.34375	-9.78125	21.7812	-16.1875	-33.9688	4.4375	-0.53125	-26.3438	33.7812	37.6875	-19.2188	-4.96875	-14.625	0.01346	19.1562	22.1562	-16.3438	-5.96875	-11.8125	12.375	9.375	9.90625	-19.6875	8.21875	1.125	-15.6562		0.01346
0.0135	-6.5	-29.5	6.1875	-13.5	6.09375	-28.2812	-17.9375	10.3438	-44.875	-40.9062	40.4688	13.4375	0.0135	-0.5625	-18.3125	-23.5	-5.8125	-19.4375	8.3125	10.3438	12.8438	-2.75	6.625	18.9375	16.1875	33.875	-33.3438	-41.9375	-4.09375	-14.5625	-16.1875	-1.21875	17.125	39.9062	0.01348	4.21875	-40.9062	-5	-4.75	19.4062	28.4375	-5.84375	-18.1875	-12.9375	-7.71875	-9.71875	-17.2188		0.01348
0.01352	-6.1875	-16	-28	-9.59375	-24.7812	1.25	4.53125	27.7812	-7.40625	10.5938	-26.875	-4.34375	0.01352	-5.15625	-13.6562	-7.0625	-16.8125	7.21875	2.875	-7.4375	-2.5625	-0.71875	-15.1875	-10.25	-22.3438	0.15625	-3.9375	3.53125	0.40625	-7.09375	-14.1875	2.9375	-4.90625	-33.0625	0.0135	20.3438	11.8438	4.34375	2.625	17.375	20.1875	-26.625	7.9375	12.4375	-5.875	8.5	-0.34375		0.0135
0.01354	-22.3125	-24.25	14.1562	12.125	-1.28125	-23.9688	-18.6562	-32.25	21.6562	25.0312	-33.25	-40.625	0.01354	18.4062	20.2812	-11.3438	17.5938	-17.625	-16	-25.9062	-32.25	-20.75	-2.78125	-32.5625	-25.2812	-26.375	0.59375	-13.7188	-5.15625	4.28125	-3.78125	-3.78125	-5.25	-24.625	0.01352	3.78125	12.8438	-3.75	-23.7812	-16.2812	15.9688	-11.1875	21.4688	-9.875	-25.4062	-10.3438	-16.6562		0.01352
0.01356	-7.59375	-26.625	31.4062	-7.96875	-21.4062	-24.5312	11.8125	-2.09375	-25.125	-33.7188	15.5	-28.875	0.01356	10.6875	2.78125	0.21875	7.03125	-31.3125	-9.625	17.125	16.9375	13.8438	15.4375	-12.875	12.3438	-18.9375	-23.625	-6	4.28125	-16.3438	-10.0625	-4.125	11.125	16.9688	0.01354	-32.75	-34.0312	-12.4688	-19.625	5.34375	-32.25	-4.8125	-33.4062	-3.6875	6.15625	-23.75	-6.46875		0.01354
0.01358	5.21875	-10.3125	-19.6562	26.9375	-3.96875	-22.8125	7.34375	5.375	-11.7188	-28.0938	0.21875	40.4062	0.01358	-11.8438	-29.1875	-0.5	-25.5312	13.4688	12.9062	-28.0625	25.0938	-10.1875	-32.3125	27.2188	4.65625	7.96875	-10.8125	3.65625	-14.7812	-7.65625	-48.2812	-19.6562	27.4062	-24.4375	0.01356	-29.2812	-6.03125	7.25	6.84375	5.625	21.2812	28.9062	18.8125	15.2812	-26.5625	4.6875	35.8125		0.01356
0.0136	-12.7812	-1.5625	-14.3438	-11.2188	36.7812	-1.0625	-38.7812	-1.875	16.6562	2.9375	-11.5312	22.8125	0.0136	-27.9688	10.5	9.96875	-4	-1.75	-5.46875	-3.15625	-35.1562	-3.9375	-7.21875	-21.5938	-10.4062	-8.15625	17.7188	-7	8.75	-0.1875	10.375	13.625	22.8438	-4.25	0.01358	-5.625	20	-22.5625	-6.78125	-20.1562	31.4375	-16.6562	-8.6875	-12.0938	-3.75	-16.5	0.78125		0.01358
0.01362	-6.4375	12.4375	39.4062	-25.5312	-17	7.25	26.5938	-33.0625	6.21875	-19.625	-13.125	-31.2812	0.01362	1.1875	6.59375	11.2188	16.8125	-37.875	-16.2812	23.0938	-3.1875	-20.4375	25.0938	-24.5938	1.46875	-26	6.09375	-18.7188	16.375	-0.4375	11.125	-4.84375	3.65625	35.75	0.0136	-6.375	-6.34375	15.7188	-16.25	-12.8438	-56.5	-25.125	-14.375	0.46875	2.3125	8.71875	1.25		0.0136
0.01364	36.4688	-3.8125	-6	2.59375	-50.375	-30.0312	8.75	-24.6875	-28.0312	-13.625	6.84375	-55.0312	0.01364	1.34375	-33.0625	0.75	-18.2188	7.15625	-1.90625	3.1875	15.75	-25.8438	-34.5938	16.125	3.78125	14.875	-22.7188	1.6875	-28.2188	7.09375	1.53125	-17.5	36.125	-19.7188	0.01362	-16.9688	-23.7188	-24.375	1.78125	13.3438	-10.125	34.2812	31.5938	6.625	-32.5	-8.53125	-11.9375		0.01362
0.01366	-29.0625	-9.8125	-6.34375	-1.875	-1.75	-14.9688	-16.6562	-19.3125	5.75	4.0625	-15.625	20.0625	0.01366	-6	-2.03125	-34.4688	-7.8125	22.0938	8.4375	-4.28125	-6.65625	-4.875	-15.5312	1.6875	-15.7188	-11.4688	-1.46875	6.0625	-10.0938	-21.0312	19.1562	34.9062	9.21875	-31.3125	0.01364	11.0312	-6.5625	-7.5	-8.5	16.9375	39.9375	-0.28125	-13.125	12.7188	2.375	5.6875	-17.5625		0.01364
0.01368	-15.125	-2.21875	24.4375	-14.3125	12.1562	9.9375	-0.8125	-11.3438	8.9375	8.21875	15.9688	9.65625	0.01368	-5.84375	-14.8125	0.0625	19.6875	-6.125	-20.2812	13.2188	8.96875	-15.6875	33.5938	-8.6875	-13.3125	-8.90625	5.375	-6.96875	15.5312	-17.2812	21.2812	-3.9375	-2.25	4.625	0.01366	-35.0938	25.8438	-6.09375	-12.2188	-24.1875	-15.25	-10.9375	-41.2188	-30.8438	-18.4688	-41.5312	21.7812		0.01366
0.0137	4.90625	-5.3125	-3.53125	0.875	4.1875	34.75	25.5312	-19.8125	-2	-1.15625	-4.8125	9.75	0.0137	-3.78125	-11.0625	4.25	-7.21875	16.8438	-12.0938	-1.9375	19.125	-27.6562	-16.0938	-6.375	38.375	35.5625	-24.9688	30.4375	-0.90625	-4.78125	-34.8125	-7.15625	5.5625	-0.78125	0.01368	-2.8125	-25.4062	-9.125	-0.46875	-1.46875	-2.625	-0.90625	-9.34375	-20.8125	-29.25	14.5938	-5.34375		0.01368
0.01372	-18.2812	-22.5938	-7.5	0.90625	5.59375	-24.4688	13.5938	-2.65625	0.46875	30.3125	17.8438	1.78125	0.01372	-19.1562	4.6875	-22.375	-31.4062	37.375	9.21875	-9.78125	-26.875	-5.65625	-8.125	9.5625	-4.5625	-8.5625	25.8438	-0.5625	-12.2188	-4.25	14.625	17.4062	14.9062	-38.3438	0.0137	28.1875	3.8125	-1.0625	0.4375	-16.375	2.8125	41.875	-0.625	18.3125	-2.5	7.375	-16.5938		0.0137
0.01374	-15.7812	4.21875	-16.3125	-6.28125	-9.625	1.75	-8.6875	1.75	-24.6875	22.1562	-7.25	10.0312	0.01374	15.6562	-6.96875	2.25	53.3438	-37.5312	1.96875	-14.4688	-22.125	12.7188	10.5625	-21.75	21.3438	-32.25	12.3438	-45.5	-3.34375	22.7188	56	9.28125	-5.65625	4.96875	0.01372	-5.9375	4.9375	-2.1875	-14.0938	-13.3125	-44.8438	-39.75	-28.7812	-20.0625	45.1562	-36.5938	36.4375		0.01372
0.01376	1.5	16.4375	-24.4062	13.2188	-8.65625	22.0312	21.9375	3.96875	8.75	0.90625	-10.4688	-18.1875	0.01376	-20.5938	14.3125	-6.09375	15.6562	4.5	-16	-20.7812	31.0938	4.84375	-18.5625	9.625	9.875	1.90625	-16.625	-44.75	13.2188	3.15625	-10.7188	-10.4375	-42.5	11.3125	0.01374	-11	-6.90625	-1.53125	5.1875	6.59375	-12.25	-17.25	35.5312	-36.5	12.2188	24.3125	16.875		0.01374
0.01378	18.4688	-27.1875	-26.7812	4.90625	23.2188	-37.4062	17.75	-3.28125	1.1875	7.03125	-0.34375	16.1875	0.01378	4.90625	-1.5625	1.34375	-42.7812	28.5938	0.625	-27.2188	-11	-8.28125	-11.3438	28.9688	-31.4062	-19.875	6.25	-19.3438	-7.125	-16.3125	-6.1875	-33.0938	-4.90625	-28.8125	0.01376	7.4375	-2.34375	-4.84375	11.4688	-24.0625	-25.4688	39.0625	19.5625	-1.125	-49.375	11.2188	-55.6562		0.01376
0.0138	10.8125	-16.3125	5.0625	-41.0312	4.875	4.125	-7.8125	6.46875	-22.4375	14.5	12.375	18.0625	0.0138	-8.71875	16.0625	15.8438	2.375	-22.5	6.3125	-14	-27.4062	-8.90625	1.09375	11.3125	-24.8125	2.65625	-22.9688	14.4062	-31.5625	-13.6562	18.5312	-1.5625	-27	-14.9688	0.01378	0.34375	6.4375	1.96875	-16.2812	5.4375	-21.875	-24.7188	-35.0312	16.125	-13.3438	-28.5	-11.625		0.01378
0.01382	-1	25.9375	-1.4375	-5.71875	-37.5312	22.375	3.03125	2.96875	-9.6875	9.5	-24.5312	-15.0625	0.01382	-22.75	-6.5	-31.125	-13.5	-23.7188	-13.375	19.2188	33.125	31.4688	-9.09375	-5.5625	-23.5625	0.15625	-14.2812	-17.6562	-0.5625	2.375	-13.3438	-4.3125	-34.75	16.875	0.0138	-34.8125	-2.9375	7.5	-6.5	5.6875	-16.25	-18.7188	7.375	1.6875	18.4688	-9.25	-13.375		0.0138
0.01384	-29.7812	11.2188	-14.625	28.5312	-10.2188	-41	-9.8125	-16.5	10.5938	-6.5	4.28125	-11.9062	0.01384	-5	-22.7812	4.875	-7.84375	31.625	16.4062	-36.625	-32.375	-1.4375	-27.7188	22.9062	-18.7812	10.6875	-7	0.21875	-9.84375	-23.9688	-6.1875	-14.3438	-3.1875	-8.78125	0.01382	-0.40625	-9.78125	-12.9062	25.7188	7.625	10.375	14.4688	25.0938	-30.0625	8.75	-7.8125	-13.9062		0.01382
0.01386	1.21875	-10.0938	16.5938	-13.9375	13.0938	0.25	0.5	-11.6562	-12.0625	-5.375	-15.5938	-10.8125	0.01386	-15.9062	-20.2188	7.65625	9.21875	-25.375	6.09375	-6.15625	-35.2188	-19.5312	20.6875	-3	9.34375	-36.625	1.1875	11.9062	-21.375	-11.5312	-13.8438	-17.9375	-2.875	-10.0938	0.01384	9.9375	6.4375	19.0625	-28.9375	13.9062	2.25	8.5625	-7.59375	12.4375	-17.1875	-5.84375	21.4688		0.01384
0.01388	24.1875	0.84375	-27.1562	-30.3125	-14.0625	37.9688	-17.3438	41.125	-19.9062	-10.1562	-8.46875	-25.7812	0.01388	11.4375	-9.84375	20.625	-14.375	-32.0312	-21.6875	43.0312	22.5	14.9375	1.9375	-19.6875	2.09375	-3.875	2.5625	-6.40625	-10.7812	12.1562	13.75	1.5	-21.875	25.5938	0.01386	-22.2812	-18.4062	-26.5	0.96875	-22.2188	-15.4688	-11.5312	-24.2812	-10.375	9.21875	0.25	38.4375		0.01386
0.0139	-9.5	-11.25	-18.0938	11.125	5.59375	-46.8125	-17.4062	-1.59375	13.2188	-14.375	-7.8125	-26.7812	0.0139	-15.875	-1.5	-12.9688	-14.7188	6.5625	-19.75	-15.3125	13.375	6.46875	-4.625	16.0625	1.125	13.2188	-11.7812	-4.5	-4.9375	-32.6875	-2.40625	0.40625	10.4688	-11.7812	0.01388	4.125	13.1562	-32	-11.0938	-14	-3.03125	13.4062	-5.625	-21.4688	-1.5625	7.875	-22.4375		0.01388
0.01392	-33.5312	-20.75	32.4062	-5.65625	10.6875	-23.5	17.75	-20.2812	-14.0312	-1.78125	0.46875	8.96875	0.01392	-27.875	-37.0938	-6.3125	1.875	-14.125	-4.65625	-7.78125	-48.7188	-15.6562	32.0312	31.9375	-34.6875	-7.34375	13.75	1.65625	-11.3125	-20.3125	-10.2188	23.8438	7.90625	-4.4375	0.0139	11.7188	18.125	23.9062	-20.4688	9.46875	25.9375	-20.3438	-14.1562	2.625	-15.5312	-25.5625	-15.8438		0.0139
0.01394	6	-3.25	0.65625	-18	12.9688	46.75	1.5	18.2812	-10.9375	-8.65625	-19.2188	-29.5625	0.01394	-8.46875	2.15625	30.8438	-33.0625	-34.25	-32.375	-1	3.84375	-4.4375	-5.59375	-28.0625	30.25	4.65625	16.7812	-26.8438	5.71875	-2.96875	-3.03125	-22.3125	-26.9375	28.5312	0.01392	-15.25	-28.0938	-0.875	15.5312	4.1875	45.3438	5.8125	27.375	29.125	8.15625	-0.59375	8.0625		0.01392
0.01396	25.875	20.9688	-19.0938	-14.2812	-4.03125	-8.46875	-29.8125	-2.875	20.1875	1.65625	-10.2812	6.40625	0.01396	30.3438	-14.1875	22.0312	-13.5312	13.875	7.84375	3.375	8.46875	23.75	-44.6875	7.375	20.7812	-7.53125	-18.875	-28.5312	22.0938	10.3438	2.4375	-15.2812	13.75	-3.4375	0.01394	-2.6875	27.9375	-17.125	8.1875	-25.2812	-0.125	-11.7812	-5.09375	-8.96875	10.9688	18.0625	13.9375		0.01394
0.01398	-35.0312	-35.4375	4.53125	-0.15625	-16.4062	-20.6562	-20	-14.4688	-26.1875	-19.4375	35.7188	9.25	0.01398	-6.875	-32.2812	21.25	11.7188	-5.84375	31.75	-16.9062	-39.6562	-20.3438	-8.84375	28.3438	-17.8125	-4.125	7.53125	-9.40625	-4.78125	8.0625	-1.1875	7.71875	6.34375	-32.875	0.01396	-1.40625	-34.1562	21.8125	8.21875	-12.6875	-25.5	-8.8125	-41.3125	-12.2812	-8.625	-9.21875	-15.9062		0.01396
0.014	-10	22.375	25.8438	-1.71875	-12.3125	0.96875	41.9688	1.15625	-35.7188	-30.75	-18.3125	-2.3125	0.014	7.5	11.8438	-20.625	-18.5	-41.5625	-31.0938	0.8125	7.4375	-19.125	2.75	-18.9062	-6.71875	-16.625	-10.3438	-31.8125	-19.5	-10.6875	-9.0625	-7.46875	-25.5938	36.8125	0.01398	-24.8125	-4.15625	27.4375	-12.1875	38	-3.78125	-25.5938	-9.25	24.5312	11.25	15.25	14.8438		0.01398
0.01402	-17	9.8125	-5.4375	-6.71875	-6.5	-42.2812	-4.65625	-18.0625	6.34375	1.21875	-8.53125	8.8125	0.01402	23.3438	-7	-26.25	3.9375	13.5938	-10.7812	-6.4375	24.0312	38.4062	-8.78125	-22.3438	10.5625	14.0625	-23.3125	31.5625	4.46875	12.7188	-0.9375	-2.28125	15.2812	12.625	0.014	-0.25	5.09375	-37.1875	-12.3438	-24.0625	-29.1875	-12.5625	-1.71875	-5.59375	-9.4375	-13.625	-10.7188		0.014
0.01404	-18.9688	-44.125	-3.0625	-16.9688	-8.78125	-20.625	-44.5938	2.3125	-6.4375	9.3125	25.8438	3.875	0.01404	-11.6562	-1.21875	-69.7188	3.78125	11.1562	16.2188	-19.1875	6.59375	23.5938	-15.0312	-14.3125	-12.125	0.40625	-0.96875	8.3125	3.03125	2.375	-7.40625	-13.25	-3.625	-48.7812	0.01402	2.96875	-4.46875	-21	5.875	2.53125	-2.625	23.5625	4.53125	-20.9688	7.96875	-12.9688	-27.7812		0.01402
0.01406	-12.7188	-25	-7.40625	-19.4375	-1.8125	6.875	30	-1.625	-30.5	-12.0312	13.4688	-6.3125	0.01406	7.96875	-27.6875	-11.7188	2.125	-30.75	-2.75	31.3438	8.71875	-19.8125	18.2812	11.0625	-22.5938	-13.4688	-21	-12.0625	-0.9375	-16.4375	-30.5938	8.46875	-10.9062	-3.0625	0.01404	4.25	0.59375	23.5938	4.75	13.5312	-23.75	-5.78125	10.2188	17.0938	3.5625	-9.0625	18.0625		0.01404
0.01408	8.875	3.53125	-16.3125	12.4688	12.4375	9.78125	-18.5625	-12.625	25.375	-19.125	-16.5	1.46875	0.01408	-5.3125	13.0938	17.5	4.375	1	6.53125	-24.2188	45.3125	-22.5312	-40.7812	-12	20.9062	-8.625	-20.0625	-38.9375	-6.09375	-1.21875	23.75	-11.25	-30.2188	-11.625	0.01406	-38.6875	25.5938	-15.3438	-27.7812	-1.3125	6.96875	-36.5312	5.5	2.0625	-29.1562	13.2812	38.4688		0.01406
0.0141	-37.9375	-16.7812	15.2188	7.4375	-19.4375	-38.1562	-27.3125	15.9062	7.15625	6.375	1.75	24.4688	0.0141	5.21875	19.9688	-24.8438	26.75	13	-4.375	11.5625	13.0312	-40.0625	-15.9062	-17.8125	-15.375	-20.6562	15.1562	-0.5	7.75	8.96875	-15.4062	-9.25	5.75	-5.125	0.01408	20.75	22.375	-10.4688	15.2188	-10.6562	-0.875	-14.375	1.34375	-34.4062	-39.1562	-17.6562	-27.8438		0.01408
0.01412	9.875	-25.625	25.4062	11.9688	1.3125	-30.375	-35	-14.1562	-1.96875	-36.7812	14.5938	10.8125	0.01412	-8.46875	28.4062	17.2812	-24.8125	-22.625	-9.65625	5.28125	-7.625	-24	27.8125	12.25	-24.25	-1.375	8.875	18.9688	-18	3.75	1.3125	0.1875	-20.4062	-13.4688	0.0141	-21.2812	-36.5938	5.96875	20.2188	13.6875	-1.8125	48.4062	-14.875	-25.5625	15.0938	1.09375	-15.8438		0.0141
0.01414	46.7188	32.375	-16.25	-16.3125	-10.9688	-11.125	-0.8125	1.375	15.375	-4.9375	-42.125	-34.9375	0.01414	13.5625	-23.4375	-3.84375	-9.25	5.90625	-8.5	-18.3125	7.78125	-17	-13.875	-43.5625	23.4375	23.25	-29.8438	0.71875	-1.21875	-20.9688	26	19.0625	-1.8125	28.6562	0.01412	12.2188	-15.2188	-12.9062	-26.1875	-8.875	13.4062	-20.5	20.8125	54.375	-6.96875	23	2.28125		0.01412
0.01416	-24.2188	14.4375	6.65625	18.8438	-18.7812	9.8125	-36.0625	13.125	10.4375	-6.5	-14.0625	9.34375	0.01416	-5.59375	-20.1562	-15.75	9.84375	5.21875	11.5312	-3.5625	4.875	24.4688	-7.125	-6.6875	-9.28125	1.09375	-6.875	-5.78125	-0.84375	10.6875	-16.4375	0.21875	20.1875	2.71875	0.01414	13.6875	1.3125	-35.9062	-31.0938	-6	-8.21875	-11.7188	-13.4062	-19.5938	-1.59375	-21.7812	-27.8438		0.01414
0.01418	-15.25	5.78125	17.7188	51.5312	3.375	30.2188	8.3125	-21	-54.4688	-43.625	36	11.4688	0.01418	-39.0938	15.9062	13.5938	2.4375	-10.8125	-13.875	13.5312	-9.15625	-37.125	60.8438	-1.90625	1.21875	-63.125	33.0625	8.75	6.40625	-12.5	-25.5938	2.34375	-14.5625	-19.4375	0.01416	-24.2188	-48.6562	38.8125	-10.4062	-5.96875	-3.59375	-8.21875	-5.3125	-24.3438	-22.6875	-39.0312	-3.875		0.01416
0.0142	29.5625	9.28125	-22.9062	-26.6562	39.7188	7.28125	16.0938	-12	-10.5	-15.6562	-22.8125	-32.0312	0.0142	-39.9688	-13.7812	27.75	-35.5938	-11.0938	-25.5312	-4.40625	0.84375	-23.875	12.5312	-33.8125	-18.5625	-13.5625	-15.0312	-18.25	1.40625	-4.09375	-27.5312	4.53125	-2.375	2.15625	0.01418	-4.375	-0.3125	-12.125	4.8125	7.34375	-5.34375	16.8125	10.0938	16.1562	9.75	11.8125	-25.875		0.01418
0.01422	-4.25	-10.7812	-6.8125	-19.6875	-1.40625	-26.6562	-37.875	-16.25	-3.15625	34.0938	-19.4062	-12.625	0.01422	18.875	-10.6875	-30.8125	16.2188	25	-4.8125	-18.75	-18.3438	24.5	-33.8125	-11.4375	-12.75	6.15625	-39.0312	7.625	-12.0938	-2.5625	-16.2812	7.875	20.4375	-29.3438	0.0142	-20.125	-6.6875	-31.0938	-9.90625	-20.3438	-7.5625	-12.4688	-22.4688	24.0312	-16	7.9375	7.09375		0.0142
0.01424	-2.5	-7.9375	-1.09375	34.5625	-2.3125	17.0312	20.3125	-29.9062	-3.28125	-17.1562	14.4375	14.75	0.01424	-13.9062	3.375	-6.5	-7.65625	-15.4688	-11.8125	6.34375	-5.53125	1.84375	36.5312	-2.0625	-9.3125	4.09375	15.1562	-6.03125	23.7188	-5.90625	-16.7812	3.09375	7.71875	-7.65625	0.01422	4.75	-24.8125	5.78125	-0.6875	3.3125	-29.3125	-11.2812	-19.3125	-19.0625	17.7812	10.4375	-2.40625		0.01422
0.01426	-6.875	-9.8125	-18.2812	-9.84375	20.9062	-0.25	23.8438	0.59375	-4.25	-19.8438	3.5625	-5.21875	0.01426	-16.9062	-4.34375	36.1562	-27.5312	2.0625	8.75	-26.2812	5.40625	7.46875	40.875	-2.78125	-4.96875	17.0625	22	4.625	-23.0625	-2	3.96875	-0.5625	-49.3438	-18.75	0.01424	14.75	-5.375	-2.71875	12.3438	-1.875	14.4688	31.2188	-1.5625	-55.9062	-2.78125	-9.96875	12.0312		0.01424
0.01428	-17.0938	-4.71875	-19.0312	-15.2188	-6.34375	-27.9062	-20.7812	33.9062	16.7188	8.6875	-13.7812	13.0938	0.01428	8.96875	2.09375	-39.75	23.8125	15.5625	3.375	-21.5312	-20.4062	-0.34375	-32.5	-14.2812	-5.25	11.5625	-20.1562	8.15625	-18.5	17.7812	-6.5625	-11.0625	3.0625	9.40625	0.01426	-15	6.28125	6.5	-29.0625	-7.78125	41.7812	-10.7188	-2	5.40625	55.125	-15.3438	-6.46875		0.01426
0.0143	-6.625	16.1875	25.7188	1.40625	-41.25	1.6875	8.1875	-4.15625	-30.3125	8.21875	-13.9062	-12.2812	0.0143	8.6875	0.90625	-0.59375	-20.6875	-21.75	-13.4375	10.1562	6.375	-0.625	11.4375	23.2188	-17.0938	1.25	16.2188	-31.5938	8.0625	-0.59375	9.90625	-30.8438	-10.5625	-6.3125	0.01428	-29.375	-4	8.875	-11.5312	-17.625	-45.3125	-48.7188	-6.125	-5.28125	21.8438	10.4688	-15.0938		0.01428
0.01432	39.7188	3.4375	-38.5625	-11.6875	-14.625	2.8125	3.1875	-8.84375	5.25	-10.3125	22.4062	-9.5625	0.01432	-29.875	-17	0.4375	-30.4062	6.3125	-16.1875	-11.3438	-5.34375	-13.8125	-14.8125	-8.71875	-17.7812	-25.4062	27.8438	-13.7812	-34.4062	1.46875	-7.96875	0.0625	-40.6562	-15.5	0.0143	21.3125	-31.5625	-17.5312	12.9375	-24.125	-26.5	21.3125	5.21875	-22.7188	-39.5312	-3.125	5.84375		0.0143
0.01434	25.5625	-19.9375	-30.25	-22.7812	18.9688	-36.875	-3.21875	5.15625	8.90625	-8.34375	-13.9375	-2.1875	0.01434	-12.1875	-25.5938	-35.125	13.5625	15.9688	-9.25	-25.125	-33.8125	8.6875	-10.625	-3.125	-23.6875	-11	-33.1875	12.5625	-16.7188	23.4688	-11.0938	1.78125	-20.875	14.6562	0.01432	-5.46875	10.9375	-10.0938	17.8438	3.9375	3.96875	16.4688	19.9375	23.9688	7.34375	2.40625	-36.3125		0.01432
0.01436	12.9375	-17.25	1.875	-12.2188	-29.5312	1.125	-0.46875	16.8438	-16.6562	14.0312	-0.40625	-15.1562	0.01436	25.3438	-6.4375	10.4688	19.2812	-22.125	9.5	1.625	-21.2812	17.2188	4.78125	8.96875	-15.7812	-6.59375	-13.7188	-18.25	18.2812	-3.625	-6.78125	-24.25	12.9375	10.5625	0.01434	-1.5625	-19.125	22.0312	-20.8125	1.125	-30.5	-24.7812	4.65625	-15.5625	-0.21875	7.40625	8.21875		0.01434
0.01438	13.1875	9.15625	20.4375	19.4062	10.2188	18.4688	24.1562	-8.4375	-5.25	-15.0938	-21.6875	4.5625	0.01438	-22.6562	-4.09375	23.0625	-41.1562	-0.875	-9.90625	-13.5625	14.375	-31.1875	-18.125	-12.375	-1.125	-13.9688	12.3125	8.5625	-10.875	-34.9062	-6.09375	10.1562	-15.7812	4.59375	0.01436	5.3125	-0.59375	-1.25	-2.71875	15.3438	19.6875	-22.7812	-27.125	-2.4375	24.5938	-5.8125	7.96875		0.01436
0.0144	-20.4062	12.3438	-1.71875	-21.9375	7.40625	-14.3125	-14.4375	0.625	10.625	-6.875	0.96875	-9.09375	0.0144	3.09375	-15.4062	-5.96875	-5.34375	-13	-24.125	-37.5312	-24.0938	4.125	-6.84375	-11	-8.9375	6.53125	-17.1562	-28.875	-37.3125	-19.9062	5.5	-8.96875	-26.5	-8.6875	0.01438	-8.1875	3.96875	-15.4688	11.5	0.4375	11.9688	3.96875	-8.25	-26.4062	-19.3125	-20.1562	-24.6562		0.01438
0.01442	10.4375	-20.2188	-0.84375	-12.8438	-29.8438	-13.125	-30	14.7188	-21.4062	-0.78125	-18.5	0.1875	0.01442	-10.5	-19	8.0625	32.3125	-18.6562	2.46875	19.4062	-29.3125	13.8125	-10.0938	-39.4688	-15.0938	-13.6562	-7.0625	-3.75	29.2812	-10.875	-3.0625	-36.125	21.9375	6.03125	0.0144	-37.9688	5.59375	-13.1875	-13.5312	0.59375	-9.1875	-2.40625	16.8438	4.625	-29.625	1.28125	3.3125		0.0144
0.01444	-3.5	-10.8125	16.75	12.3438	-22.0938	11.2188	9.03125	-49.9375	9.21875	-28.625	-18.7812	-40.3125	0.01444	-8.3125	30.0312	20.625	-34.4062	-27.6562	-20.625	9.78125	38.3438	4.09375	7.71875	-16.7812	34.0938	-9.25	31.0625	6.8125	-0.71875	-4.5	-26.625	-7.625	-20.625	12.8125	0.01442	3.5625	-9.8125	-7.90625	-8.875	6.6875	-18.6562	0.0625	-4.84375	2.40625	-15.4688	20.5312	-4.40625		0.01442
0.01446	-12.7188	-25.8438	20.75	2.375	35.125	-14.0312	-28.4375	-15.5312	11.8438	-14.6562	10.8438	28.4062	0.01446	1.21875	-24.9688	7.6875	-2.15625	34.1562	-2.3125	-3.625	-14.4688	-26.4375	-33.125	42.75	20.9688	34.1875	-25.2188	-8.5625	-28.2188	-18.9375	38.5938	43.0625	15.5625	-16.375	0.01444	13.9062	11.625	6.8125	16.1875	2.125	40.8438	30.75	-28.3438	-2.78125	-4.25	-8.78125	-32.8125		0.01444
0.01448	-21.625	-24.875	14.5312	-25.375	23.5312	-12.375	-12.0938	26.4062	-28.125	20.2188	6.5	-5.375	0.01448	12.125	-38.0938	-14.1562	1.75	-29.3125	11.875	2.34375	-14.0312	8.40625	9.375	-25.7188	-22.0625	-19.8125	-22.375	-5.375	33.375	-25.6875	20.7188	-23.2188	26.8125	11.2188	0.01446	-21.9375	-14.6562	-15.625	-6.9375	-6.03125	3.34375	-29.9375	-14.375	35	2.09375	-25.9375	-16.7188		0.01446
0.0145	11.7812	10.6562	3	-13.6875	-35.2812	13.0625	10.1875	-22.5938	-0.09375	-27.0625	-11.375	-10.6875	0.0145	-14.375	13.9688	8.96875	-38.3438	-22.625	0.65625	15.2812	15.875	-19.875	25.2188	-25	6.15625	11	13.2812	2.84375	19.0938	-1.5	-35.3438	-35.4688	-35.4688	16.5312	0.01448	-1.5	-22.4062	-23.3438	-7.15625	-10.75	-12.2812	-51.5	-0.40625	0.03125	4.34375	23	29		0.01448
0.01452	-11.25	7.40625	-20.9375	28.0625	-24.625	4.71875	-22.1875	-16.875	15.1875	-2.0625	-2.625	1.28125	0.01452	17.9688	-22.7188	-23.7812	-7	47.2188	15.8125	-12.7188	-4.875	-27.6562	-24.0625	14.7812	18.7188	-0.9375	-18	-6.15625	-37.875	15.125	-10.6562	2.09375	-17.375	-11.5625	0.0145	16.9688	-5.78125	-1.625	12.9062	-21.7812	-10.9375	40.0625	15.75	-19.9375	11.375	-28.75	7.40625		0.0145
0.01454	-31.4688	-51.4062	-15.1562	-14.2188	23.125	2.125	9.9375	20.1875	-27.875	-6.46875	2.75	14.9062	0.01454	21.3125	4.375	-11.7812	-1.90625	8.71875	12.75	11.8438	-36.6875	-6.09375	-13.5625	5.53125	5.625	-2.0625	-24.2188	-3.25	10.3438	-17.875	-3.75	3.03125	24.4062	-10.5625	0.01452	-21.5	-16.4688	15.1875	-18.1875	29.2188	-1.1875	-11.2812	17.7188	8.15625	-4.96875	-22.375	-12.3438		0.01452
0.01456	8.46875	-5.65625	-0.84375	-4.625	7.90625	-14.4062	22.4688	31.9688	6.84375	-23.625	-6.5	-24.9688	0.01456	-33.4375	33.4062	0.78125	14.7188	-60.5625	0.4375	10.5312	-6.375	-6.84375	31.7812	-1.21875	-10.125	-23.875	-14.2812	-4.5	26.9688	-0.46875	-1.3125	-5.34375	-10.5	-9.28125	0.01454	-12.7188	2.75	-0.40625	0.8125	3.65625	1.0625	-5	-3.875	-5.96875	-20.4688	5.03125	47.7812		0.01454
0.01458	6.34375	42.2188	12.0938	-15.375	12.5312	-11.2812	-27.75	-38.8438	-11.875	21.7812	29.25	28.8438	0.01458	-2.40625	-9.96875	-25.5	-0.84375	17.5312	4.625	-17.2812	10.5625	10.4375	-29.8125	1.9375	-20.125	13.125	3.59375	1.9375	-26.2188	20.9062	12.5625	-5.53125	1.15625	-34.5312	0.01456	4.875	21.6562	-14.625	-13.25	-30.75	-8.75	23.1875	-12.9375	-2.9375	-7.65625	7.59375	-17.4688		0.01456
0.0146	-24.625	-1.59375	31.3125	-16.7812	14.6562	-8.96875	-21.4688	-26.4688	-28.6562	-9	31.9688	16.6875	0.0146	6.125	-0.84375	-2.9375	21.125	25.0625	1.5625	-8.9375	-24.5	-5.90625	-7	-5.4375	-21.0938	-18.8125	-44.1875	-11.125	-6.78125	-5.46875	9.75	14.875	22.4062	-25.6562	0.01458	22.6875	-3.84375	-5.8125	-3.875	2.40625	-42.9062	-26.6562	-9.46875	-4.65625	-16.9375	-52.7188	-26.7812		0.01458
0.01462	6.03125	-4.65625	2.125	19.5312	-17.3438	2.5625	11.75	-15.5	-9.9375	-9.90625	-26.5	-29.5625	0.01462	-9.84375	27.0312	-25.9375	-19.4062	-34.125	7.46875	9.84375	11.875	-15.5938	7	1.78125	-10.7812	-21.875	15.5312	9.375	42.6875	-10.5	-20.1875	-34.7812	-11.0938	12.1562	0.0146	-20.4375	-31.7812	-8.53125	19.5938	11.0625	12.125	-2.90625	5.125	-20.8125	13.6875	-2.25	-14.4375		0.0146
0.01464	-12.625	-3.6875	-7.8125	10.8438	-28.375	-14.8125	-2.875	-2.625	22.5938	27.5938	-30.0938	0.65625	0.01464	-3.46875	-14.5625	-23	-6.9375	3.375	39.125	-11.6562	15.125	5.3125	-47.25	-1.28125	5.21875	11.875	0.5	29.0312	-49.4062	20.9062	-12.875	3.34375	-23	-3.65625	0.01462	-27.9375	6.15625	1.84375	-15.6562	-13.3125	16.1875	7.21875	-6.78125	2.09375	-26.25	-5.96875	0.71875		0.01462
0.01466	-1.75	-23.5	-11.5312	5.3125	2.375	2.5	6.09375	14.8125	23.5	16.875	38.7812	-1.5625	0.01466	-18.875	-26.1562	2.8125	-1.5625	59.1875	7.75	-21.125	-22.1875	-2.34375	-31.8125	2.21875	-24.1875	-22.6562	-16	-19.625	-20.1562	30.5938	-7.875	50.2812	14.2812	-16.5	0.01464	-5.8125	40.125	1.78125	-21.7188	5.1875	-17.375	17.125	-11	22.0312	-28.5	-39.2188	1.0625		0.01464
0.01468	6.625	22.0625	30.3125	8.15625	39.2188	34.9062	1.0625	21.0312	-28.625	-20.1875	-8.1875	-47.875	0.01468	-34.9375	32.0625	15.7188	8.09375	-34.25	-8.25	-4.71875	3.84375	-6.78125	45.5938	-16.1875	-14.9062	-21.1562	-0.78125	3.625	35.3125	1.96875	-16.9062	-33.0938	1.15625	-3.5	0.01466	-24.5	-27.4688	-18.7188	-14.3438	6.5625	-2.5625	-20	20.5312	-26.7188	4.6875	8.59375	25.0312		0.01466
0.0147	3.125	15.8125	4.15625	36.2188	-21.75	-2.8125	-41.875	0.4375	30.3125	-15	-38.1562	0.78125	0.0147	-8	-2.125	-7.96875	0.15625	3.96875	-11.4375	12.9375	23.9062	14.2812	-17.8125	-9.8125	25.0938	25.8125	23.625	23.6875	-12.9375	21.4062	-15.8125	-4.8125	-40.25	-3.625	0.01468	15.2812	-26.8125	-4.5	10.9375	8.75	-1.25	3.96875	14.3438	-16.5	17.5	35.9688	-7.34375		0.01468
0.01472	-1.75	15.5625	19.4062	-11.7812	-14.5	-5.5625	-15.625	-20.0625	-13.75	8.25	3.96875	4.28125	0.01472	2.65625	-30.5	-15.1562	-1.96875	20.5938	-3.5625	-9.15625	-23.2812	-4.25	-13.9062	-9.15625	5.9375	-12.875	9.6875	-27.875	-35.8438	16.4688	15.125	7.71875	14.2812	2.96875	0.0147	-7.90625	13.8438	-4.96875	-20.375	-11.1875	-16.4062	4.34375	-5.84375	16.1562	-23.9375	16.875	-8.125		0.0147
0.01474	21.5938	5.15625	2.65625	-2	8.46875	19.8438	16.9062	12.75	-14.875	-25.1875	27.7188	-18.4688	0.01474	-16.4375	2.75	23.5625	-0.40625	-32.5	-17.9375	-1.53125	-6.15625	-27.8438	31.9688	-24.9062	-18.75	-3.78125	-19.3438	-16.4375	18.1875	-33.25	-19.9062	-24.875	18.9062	43.75	0.01472	-21.2188	-39.7188	2.125	22.125	3.4375	-9.21875	-20.5	-32.125	-8.84375	-36.25	-8	0.34375		0.01472
0.01476	15.3438	5.4375	-11.9688	-12.625	25.375	-39.5938	-7.625	25	0.78125	-1.875	-24.125	-35.2188	0.01476	-20.2188	14.9688	3.71875	-20.6562	-17.5938	-9.625	-12.3438	29.4375	10.2188	-11.4062	-1.34375	6.15625	10.4062	18.9688	31.9375	11.5938	4.21875	-2.46875	-24.4062	-31.8125	35.1875	0.01474	-13.1562	0.375	-20.6875	7.84375	-23.0938	3.65625	13.125	25.0938	12.5625	14.375	-14.3125	7.46875		0.01474
0.01478	-28.1562	-0.09375	-0.125	-46.3125	14.8125	-10.7812	-24.9688	-10.8125	-6	16.25	-3.28125	0.03125	0.01478	7.5	-48.3125	-31.75	-21.625	27.5	4.34375	13.8125	-9.625	24.8125	-34.9062	6.8125	-4.25	33.5	5.8125	-28.9062	-10.2188	19.0625	32.6875	-5.6875	5.46875	12.4688	0.01476	23.0938	17.875	4.8125	-11.625	7.375	-8.9375	-6.6875	-3.375	-10.5	23.875	22.25	-15.4062		0.01476
0.0148	-18.9688	-17.5312	7.125	19.9688	-3.8125	46.0938	44.9375	-27.0625	-24.375	-9.8125	13.5625	1.0625	0.0148	5.65625	11.0938	30.8438	-4.5	-22.9062	0.09375	9.875	-48.25	20.5312	34.2812	-23.8125	-27.8125	4.40625	-14.9688	-38.0625	34.75	-9.875	-23.9688	35.0938	3.625	-13.2812	0.01478	6.6875	-5.5625	19.1562	-1.34375	-8.4375	-9.3125	1.25	-35.9688	3.5	-27.3438	1.59375	6.21875		0.01478
0.01482	-15.3125	1.59375	11.875	-5.5	-5.28125	14.6875	17.2812	-9.96875	-0.5625	0.125	-5.375	1.65625	0.01482	-18.6875	12.5938	0.46875	-23.9062	7.125	-12.6875	-11.3438	8.46875	29.7188	-7.3125	9.4375	-14.2812	-3.84375	-5.84375	15.5	3.5625	15.5312	-12.1875	0.65625	-36.875	16.0938	0.0148	-18.1562	-34.5625	7.1875	-1.40625	-28.375	-12.6562	-11.5625	5.40625	-1.59375	-2.5	20.0938	-40.4688		0.0148
0.01484	-29.4062	0.03125	-19.2188	-31.125	-16.625	-33.9375	-18.6562	31.9688	-12.4688	25.5625	-25.6562	14.8438	0.01484	12.6875	-39.2188	-34.9375	-3.15625	15.875	-6.71875	-24.625	-19.0312	19.9375	-40.9375	8.53125	10.6875	38.1875	-10.7188	-16.3125	-15.7812	1.46875	16.8125	-23.0312	-39.4375	9.25	0.01482	1.1875	15.1875	-1.59375	-19.7812	11.0312	2.6875	-21.6562	-30.625	11.3125	38.125	-0.9375	-9		0.01482
0.01486	-3.5	-17.0312	-22.375	29.625	-9.40625	18.1875	4.0625	18.1562	-22.75	-8.84375	-15.625	-54.9062	0.01486	12.4375	4.53125	11.1875	-3.84375	-29.9062	1.5	1.78125	-33.1562	-9.1875	3.5	-12.7188	10.4375	-42.2812	-8.375	-20.25	30.375	-19.3438	9.78125	4.53125	7.96875	-31.5	0.01484	0.78125	6.125	31.1875	-1.6875	17.5625	-13.0938	-13.5938	1.46875	-38.7812	-13.5312	14.7812	-11.3125		0.01484
0.01488	30.875	-16.5	6.09375	-2.125	31.6562	9.5	-17.875	-5.21875	26.1875	-15.5625	23.5312	8.46875	0.01488	-3.5625	11.9688	14.0625	-24.0312	-3.84375	-18.9375	-18.4062	4.40625	3.1875	7.28125	-13.0312	-17.2812	4.3125	13.2188	7.75	-2.71875	-4.25	-5.25	-28.375	-6	-12.9375	0.01486	-21.375	-18.9688	-24.2188	-0.1875	-26.5938	17.8125	-2.15625	9.4375	-17.625	-12.4062	-9.71875	3.46875		0.01486
0.0149	-19.5	-36.6875	14.125	-37.8438	28.8125	-53.4375	-60.5	15.125	47.25	-14.6562	35.4062	-5.71875	0.0149	14.0938	-28.9688	-33.7812	14.4062	19.4688	-15.125	-21.4688	2.375	9.15625	-46.8125	-20.125	10.0312	20.75	-23.0312	11.5938	-28.125	-1.03125	1.5	-20.7812	-25.2812	1.4375	0.01488	-7.90625	10.4688	-23.5938	-13	2.1875	-23.5	21.8125	-5.25	11.1875	20.1562	-12	13.625		0.01488
0.01492	-8.46875	-21.9062	-20	0.5625	-16.25	-14.3125	0.40625	-16.625	4.3125	-10.75	20.6562	-17.4375	0.01492	1	-5.4375	-21.875	15	-32.25	15.8125	9.75	-8	-19.3438	12.3438	6.78125	-26.6875	-40.375	-16.375	-39.8438	18.7812	-19.7812	8.28125	-4.3125	26.875	8.96875	0.0149	5.6875	10.0625	-11.8438	1.96875	9.53125	-3.46875	-22.8125	7.1875	5.78125	-30.9062	14.875	-17.5938		0.0149
0.01494	9.0625	27.25	-10.8438	48.9688	-0.09375	9.6875	46.0312	-1.5625	11.0938	18.5938	16.125	27.75	0.01494	-13.8125	2.1875	21.375	-42.125	-43.7188	-16.4375	-0.40625	1.9375	-7.25	16.2812	-15.9375	-27.4375	2.21875	-6.84375	-7.15625	31.9688	-10.1562	-17.0938	6.6875	-19.5625	16.8438	0.01492	-1.09375	1.21875	5.5	-7.71875	12.875	21.3125	-25.0938	6.4375	-6.28125	-18.25	-10.1562	-8.5		0.01492
0.01496	2.4375	-10.4375	35.1562	-34.8438	57.7812	-20.9688	-28.8125	31.1562	-8.96875	14.1875	2.4375	13.8438	0.01496	6.25	-16	-10.0312	11	-7.375	-15.0938	-17.375	13.8438	13.3125	-52.1875	-20.8438	17.9688	3.3125	-21.3125	-8.875	-31.5312	-7.0625	5.1875	-18.4375	-5.8125	11.6875	0.01494	0.4375	-7.15625	-20.75	-20.4375	0.09375	3.5625	-13.0312	15.75	12.5938	20.375	-20.875	-15.25		0.01494
0.01498	-32.5	2.125	-5.6875	-15.1875	3.3125	-1.40625	-37.875	-8.09375	-16	-23.8125	25.9688	-17.875	0.01498	-19.9062	-12.375	-23.75	13.3125	4.90625	-10.75	18.4375	-31.1875	-12.0625	17.3438	13.9375	6.21875	12.1562	-1.46875	-11.125	17.4062	-30.5625	-3.25	-2.375	35.1562	-2.28125	0.01496	9.0625	-4.21875	-4.3125	28.9375	21.5938	9.96875	-7.53125	-18.125	-28.3438	2.3125	5.96875	-6.125		0.01496
0.015	-6.21875	12.7812	-14.0312	20.2188	-2.1875	31.1875	3.875	-40.7812	29.9062	-16.8125	8.46875	-0.875	0.015	-27.6875	8.40625	24.4688	-32.9375	-38.875	-13.4688	0.3125	12.8438	-30.5938	10.0625	-0.9375	-4.84375	-28.6562	7.96875	17.9062	37.625	-26.5	-33.125	17.1562	11.6562	1.75	0.01498	5.15625	3.96875	-20.375	8.21875	0.3125	12.375	12.75	0.0625	6.65625	-30.9062	-4.875	-3.375		0.01498
0.01502	-20.25	8.71875	16.9375	-17.25	16.8438	-30.5938	19	-43.75	20.4062	-0.6875	-1.96875	19.9688	0.01502	22.5625	-18.2188	-10.7188	-11.8125	9.09375	-3.25	6.0625	16.4375	-12.4375	-33.5	-4.53125	9.9375	-13.5	-2.125	7.0625	-43.8125	23.4062	21.0625	21.125	-15.875	-17.9688	0.015	0.21875	9.4375	-2.0625	-19.8438	12.5312	-20.5	-5.03125	-22.0625	-6.5	-7.28125	-11.3125	11.4062		0.015
0.01504	-3.25	-5.8125	5.125	12.9375	-6.40625	-16.4688	-20.7188	15.6562	-13.3125	-15.4375	-29.5	-20.9062	0.01504	30.5625	2.96875	-14.4062	40.5312	18.2812	-15.8438	-3.875	-13.4375	-30.2188	-0.5625	8.96875	20.2188	1.96875	-15.2812	-9.28125	-16.375	8.5625	0.84375	26.875	2.28125	-3.5625	0.01502	-14.1875	-20.3125	46.375	-1.875	23.375	-25.5938	-5.0625	20.4688	-16.5	-8.3125	13	-20.4375		0.01502
0.01506	3.09375	6.40625	-17.5938	40.625	-8.53125	27.7188	-7	-3.3125	-18.7812	-4.4375	13.5938	5.53125	0.01506	-32.5	4.375	44.7812	-34.0625	-30.25	-21.1875	3.71875	18.125	-2.9375	32.6875	14.8125	-16.1562	2.0625	7.96875	-12.7812	39.5	-44.0625	-30.875	27.7812	40.9375	-15	0.01504	-7.9375	-23.0625	-10.6875	14.25	-16.375	16.4688	-0.21875	13.0625	7.3125	-34.3438	7.1875	-10.8438		0.01504
0.01508	-11.8125	-9.9375	21.7188	-6.09375	30.3125	-10.125	-17.9688	-42.9375	2.3125	13.3438	1.75	15.4375	0.01508	11.2188	4.03125	7.6875	-0.71875	1.5625	-12.0312	-10.9688	-18.6875	3.15625	-39.1562	-34.0625	-10.9062	6.5	2.375	2.09375	-36.9062	7.1875	11	1.96875	-23.875	-26.625	0.01506	6.21875	-6.5625	-27.6875	-26	-24.9375	13.4375	-9.59375	-25	43.75	5.125	-2.9375	21.8125		0.01506
0.0151	-13	0.4375	-3.1875	-34.3125	0.71875	10.625	-39.5312	35.875	-34.2812	-3.90625	-11.9375	-18.5938	0.0151	6.9375	16.5938	-2.6875	61.3125	18.7812	4.28125	-19.3438	10.4375	-0.96875	4.09375	-11.5	19.2188	-9.40625	-19.5	-13.7188	-4.75	10.9375	1.5625	12.875	11.2188	-23.0625	0.01508	3.5	-27.5625	10	-9.28125	1.78125	-45.9688	0.8125	-36.5	-36.5312	28.5312	-11.7188	10		0.01508
0.01512	20.4688	12.7812	-37.7188	4.71875	-34	9.15625	30.5625	35.3125	7.96875	-18.2188	14.6875	4.25	0.01512	-43.1875	22.4062	25.75	3.21875	-19.1875	-0.53125	-12.3125	3.125	-13.5625	46.9688	36.0625	-18.4062	-26.3125	3.6875	-25.125	6.59375	-13.25	-11.4688	24.2188	2.59375	-16.9688	0.0151	-5.3125	-5.625	-7.71875	9.21875	-1.9375	0.96875	15.6562	1.46875	-42.5	-4.4375	10.125	-5.65625		0.0151
0.01514	-15.5312	-10.625	-18.75	14.6562	-1.625	-27.6562	1.65625	-19.4375	12.9062	28.4688	20.75	16.6562	0.01514	7.21875	-17.125	-19.25	11.625	9.96875	-8	0.125	-6.40625	-39.9062	-52.9688	-12.5	-29.4688	-22.5	6.71875	19.5625	-33.6875	-20.4062	-7	-1.25	-22.5	-21.875	0.01512	2.625	13.7812	8.875	-27.3438	0.09375	17.0938	-23.0312	6.0625	27.5938	-2.8125	-26.8125	-32.7188		0.01512
0.01516	-16.125	-42.875	18.4688	-7.375	-14.2188	19.9375	16.1875	8.59375	-16.625	-2.15625	-22.4688	-3.125	0.01516	9.375	4.9375	-18	58.1562	10.7812	-0.125	3.75	-14.9062	12.0312	-31.125	-9.90625	-1.4375	-6.75	-40.8125	-23.2188	-25.8438	50.3125	2.84375	6.125	-23.6875	-18	0.01514	-18	-4.9375	-1.15625	-18.875	-20.5	-41	-22.0312	-36.75	-24.875	7.46875	-13.1562	22.4375		0.01514
0.01518	15.9062	18.4375	8.40625	6.34375	-12.0625	15.1562	17.9688	2.0625	-36.9375	-6.65625	5.4375	-15.4062	0.01518	-46.7812	45.3438	17.7812	-5.1875	-1.40625	3.75	-24.3438	-16.4688	-2.5625	28.5625	-1.34375	-18.0938	-0.71875	-9.21875	13.8125	7.28125	-31.9688	-12.9375	-4.09375	-5	-6.0625	0.01516	1.21875	-23.5312	-5.90625	-11.375	-14.5625	8.75	28.7188	-18.2188	3.4375	-7.6875	20.9375	-15.2812		0.01516
0.0152	0.15625	37.9688	-23.0625	20.4062	3.90625	-20.125	-13.4375	-33.1875	32.125	-11.0625	-7.09375	17.1562	0.0152	-27.9375	-32.2188	-17	2.21875	-6.78125	-11	-13.5938	12.7812	-18.6875	-20.8125	-8.28125	-25.3125	-10.2188	30.375	4.09375	-17.8438	-27.3125	-10	-14.4062	6.84375	-3.78125	0.01518	14.3438	44.125	3.96875	3.71875	-28.25	24.3438	12.0312	30.625	10.9688	-9.375	-15.2812	-26.5		0.01518
0.01522	-4.53125	-9.125	1.1875	-16.9688	2.59375	-11.8125	-2.21875	3.1875	22.1562	-20.4375	-13.25	-47.1875	0.01522	20.9375	-10.9062	18.0625	11.8125	24.0938	7.78125	-9.90625	-32.25	-14.625	-25.9062	-10.4375	30.7812	10	-44.8438	-2.9375	-23.4062	34.4688	21.875	-14.1875	-11.4375	6.28125	0.0152	-33.25	-7.59375	6.4375	-10.625	20.8438	7.96875	-11.5938	-10.1562	-23.8125	10.2188	-11.7812	2.1875		0.0152
0.01524	0.96875	10.2188	-0.53125	14	-16	4.46875	16.3125	35.5625	-51.1562	0.59375	-26.0938	-49.4062	0.01524	-35.5938	39	17.2188	-23.0625	-29.375	-16.0938	9.0625	11.6562	-1.625	26.25	-7.59375	-17.6562	-10.2188	-4.59375	-9.96875	23.6875	-20.2812	-18.1562	-29.9688	23.0625	-7.0625	0.01522	-6.1875	-21.5938	-2	5.625	-14	-29	-19.875	34.8438	-3.03125	-23.625	-5.40625	7.34375		0.01522
0.01526	16.6875	-0.25	-7	4.90625	-10.5938	-10.8438	-36.1875	-6.1875	-8.78125	2.4375	-31.8438	15.4062	0.01526	-20.6875	-32.25	-5.53125	-33.1562	-16.2188	-19.625	-15.6562	11.5938	-3.71875	12.875	-24.6875	-26	-3.03125	44.9375	12.125	-15.1875	-29.7812	-16.0625	-8.40625	-4.1875	3.96875	0.01524	-7.3125	-6.3125	-15.6875	-1.96875	3.03125	-9.125	5.09375	-4	13.9375	-16.9062	4.53125	-29.1562		0.01524
0.01528	-10.25	-28.4688	-0.0625	-18.9688	22.0312	10.4375	7	7.03125	-10.7188	-17.8125	-17.9688	18.2188	0.01528	-5	-28.625	2	10.625	11.9062	0.25	-18.3125	-41.7188	-1.4375	-24.2188	-43.875	4.6875	12.4062	-0.0625	-19.7188	-50.125	-2.21875	4.09375	-11.5625	-11.125	0.46875	0.01526	13.0938	0.125	-3.5	-45	-6.96875	-1.78125	-20.3438	14.6875	16.5938	-3.75	-16.5	-23.1875		0.01526
0.0153	-19.5625	-3.375	17.9688	-0.71875	-10.625	6.09375	24.4688	4.59375	-16.5	-23.1562	-4.6875	-35.7812	0.0153	-8.59375	28.75	13.2188	-20.625	-19.9062	-29.3438	34.1562	-1.25	11.0625	-5.75	14.2812	-12.6562	-17.125	0.875	-24.2188	8.65625	-13.8125	-5.28125	2.34375	-22.125	7.59375	0.01528	-19.9688	16.2188	-6.125	15.3438	-22.4688	5	7.8125	27.875	-41.5312	15.5312	22.9375	62.5312		0.01528
0.01532	-27.8438	22.7812	-2.9375	-8.84375	-21.4375	-29.1875	-6.15625	-4.59375	8.96875	18.875	21.7812	-7.5625	0.01532	-8.34375	-25.75	-14.75	-42.5938	3.84375	7.53125	2.75	9.4375	-25.2188	-11.2188	14.9375	-21.4062	-10.25	31.9688	9.96875	1.21875	-23.75	-13.9688	10.5625	-3.125	-14.2812	0.0153	-10.0938	11.3125	-29.9688	10.8438	-6.90625	28.375	27.2188	-7.5	-5.46875	6.09375	-7.78125	-17.0938		0.0153
0.01534	-23.1875	-14.1875	-15.25	-14.2188	-2.59375	-12.1562	-7.96875	-5.0625	-24.0312	18.7188	-2.875	29.0312	0.01534	20.125	-26.6562	-8.90625	8.1875	15.7812	-13.125	-6.34375	-30.2812	-1.25	-19.4688	-8.40625	-5.8125	5.8125	25.8438	9.09375	-36.125	-2	17.75	-9.8125	-14.75	9.03125	0.01532	18.9062	-8.6875	36.25	8.59375	-12.375	-24.4375	0.8125	-25.9062	-10.3438	-3.40625	-6.625	-16.7188		0.01532
0.01536	-24.3125	-34.625	13.1875	-2.96875	-5.59375	19	43.2188	-28.6562	-14.1562	-14.6562	-16.7812	-30.1875	0.01536	-4.1875	17.3125	-6.6875	8.5625	-8.34375	-3.375	45.0312	-29.4062	23.125	2.3125	-5.875	7.65625	-4.875	-9.71875	-31.7812	20.1562	18.3438	14.5312	-8.5	0.21875	-13.3438	0.01534	-18.4688	-45.1875	-24.1875	-9.3125	5.4375	-8.875	-9	-22.9688	-22.2188	1.46875	2.0625	47.8125		0.01534
0.01538	-7.96875	-6.375	41	4.21875	15.8125	-25.8125	-7.9375	-0.34375	-1.8125	-1.71875	-18.8438	-16	0.01538	-20.4688	-4.5625	-24.5938	-17.4688	4.6875	-8.09375	0.40625	10.2812	-9.53125	8.09375	7.0625	10.0312	-33.7188	2.6875	11.4375	31.9375	-32.9375	-38.5625	10.5312	-14.1562	-14.5	0.01536	12.4062	-4.8125	-19.5	7.28125	-18	-10.5938	24.4062	9.40625	-6.6875	-2.78125	-10.2188	-3.09375		0.01536
0.0154	-7.75	-25.3125	-11.5625	-35.625	-30.1875	-1.8125	-5.5	45.5938	9.21875	-22.75	7.4375	36.1875	0.0154	21.0625	-28.4062	-41.5	-3.90625	40.375	-4.5	-12.3125	-42.7812	-14.9688	-32.0625	1.34375	7.71875	-3.9375	4.46875	16.5312	-40.5312	6.03125	3.21875	-19.4062	7.40625	2.21875	0.01538	32.9062	11.6875	10.5	-13.5312	-4.78125	-35.6562	-2.09375	-19.0625	11.375	-1.71875	-10.0938	-22.3125		0.01538
0.01542	-15	-4.71875	-22.4062	16.2188	-45.5938	0.90625	32.5	42.5312	-3.1875	-13.0625	-0.75	6.0625	0.01542	10.7188	10.9062	3.25	25.25	7.28125	-2.71875	21.2188	-31.7812	-31.875	-2.0625	-3.625	-18.4375	-16.4375	-27.5	-39.375	3.59375	17.4062	23.8125	-23.7188	-22.0312	-33.0938	0.0154	15.1875	22.5938	-4.375	-24.8438	14.0625	22.5938	-32.6562	8.5625	21.9062	-25.4062	-1.5	-5.53125		0.0154
0.01544	-16.4375	5.34375	4.28125	13.3438	35.25	-20.375	0.875	-17.375	29.0938	9.125	2.0625	-12.3125	0.01544	18.4688	2.25	2.78125	-39.75	-28.7188	-21.75	-9.09375	46.5938	-2.5	17.5	-15.125	-8.1875	-22.3125	-13.5938	-3	28.5	-12.25	-26	-16.875	1.21875	15.5625	0.01542	-22.125	-16	-26.0938	5.3125	-19.2188	18.1875	-5.65625	3.375	-28.5312	0.3125	-7.25	26.875		0.01542
0.01546	-37.25	-21.5312	22.5312	-17.4375	18.3125	0.6875	-55.25	32.6875	-10.5312	-5.25	-10.1562	6.25	0.01546	16.6562	-26.5938	-16.9062	-6.8125	9.6875	0.71875	-2.5625	-1.28125	-9.375	-25.3438	-2.0625	-4	-7.125	6.5	29.5	-43.1562	-16.7188	-19.625	-2.9375	20.5312	-10.125	0.01544	-18.8438	-0.46875	4.125	-2.90625	-14.9062	-25.9375	28.0625	-19.1562	10.375	17.5	11.9375	-38.3438		0.01544
0.01548	-20.5938	-32.5	-21.625	12.5625	-28.2812	9.5625	-24.1562	20.625	-30.6875	-10.75	-1.90625	14.25	0.01548	21.4688	21.1562	17.0625	17.1562	13.0938	19.9688	12.6875	-16.6562	13.8125	4.71875	1.4375	-12.4688	26.375	-13.75	-23.2188	-6.125	-0.90625	0.59375	-12.5	-0.5	-14.1875	0.01546	3.0625	-7.9375	-6.15625	-2.96875	20.0938	-5.34375	-5.21875	30.375	-7.75	-25.1875	-1.5625	-3.15625		0.01546
0.0155	27.4688	21.6562	-9.3125	-1.21875	-7.0625	-23.125	9.96875	-53.7188	13.0312	10.3125	3.09375	-1.65625	0.0155	10.2812	-0.09375	-1.9375	-32.5625	-20.25	-13.9688	28.8125	25.9688	1	25	-4.84375	-23.8125	-7.3125	6.125	-3.125	25.4688	-10.375	-0.1875	-5.28125	-11.9375	4.96875	0.01548	-19.1875	13.5	-13.8438	-18.2812	11.6875	7.15625	-8.3125	-5.53125	-1.96875	-36.0938	-46.6562	15.5312		0.01548
0.01552	22.0625	5.65625	17.4062	-13.0938	1.65625	-32.375	-36.6562	35.75	2.34375	1.40625	-9.90625	11.9688	0.01552	6.5625	-13.3438	-33.5312	-0.03125	19.9062	-10.9375	-5.6875	17.2812	-43.8125	-35.5	1.53125	6.34375	-8.375	-6.0625	25.9375	-16.375	-7.09375	-21.5	-7.90625	17.4688	15.7188	0.0155	-27	8.375	1.625	-21.4688	-10.125	3.375	-17.1875	6.25	19.7812	1.84375	-15.5	-7.375		0.0155
0.01554	12.4688	-26.1875	-1.03125	23.375	-19.625	29.5312	-3.09375	10.3438	-34.1875	-29.5312	1.5625	23.0625	0.01554	-0.5	5.28125	17.9375	2.875	-0.90625	-5.625	9.34375	-34	0.3125	-4.1875	-3.5	26.7812	25	-31.3438	-27.5312	-13.375	-4.40625	1.1875	0.40625	-25.2188	-32.4062	0.01552	2.96875	-19.625	-7.875	10.7188	3.8125	-31.2188	18.4375	-13.7812	4	-17.625	7.15625	6.90625		0.01552
0.01556	18.0312	5.625	-32.9688	36.25	39.9062	25.9062	20.1562	-42.9688	19.9688	-23.9062	-10.625	39.0625	0.01556	10.3438	-11.1875	10.5938	-11.5312	-46.3438	-37.0938	-1.1875	37.75	-18	15.3438	-28.9062	-24.8125	-18.0938	-18.3125	-24.6875	27.7188	-4.9375	9.375	12.8125	7.8125	-17.6875	0.01554	-20.3125	-3.8125	-8.5	15.6875	-10.8438	19.4688	9.21875	3.1875	-4.21875	-12.2812	-8.96875	-10.9062		0.01554
0.01558	-1	8.34375	-10.0625	-1.125	14.125	9.0625	-26.9688	7.21875	23.2188	26.5312	-21.8438	1.59375	0.01558	28.4688	4.15625	-51.9375	-8.71875	24.5625	3.34375	4.78125	9.75	-30.4375	-19.8438	25.6875	0.0625	0.25	30.5625	32.9688	-6.8125	-4.625	-22.0625	-8.65625	25.9375	-6.4375	0.01556	-12.9688	-16.2188	-5.625	-19.375	-32.3438	-14.2188	-3.96875	10.75	-37.6562	12.125	-28.375	-30.625		0.01556
0.0156	0.96875	21.875	-7.34375	-17.6875	-39.8438	12.625	0.84375	17.875	-19.7812	-4	-12.0312	-22	0.0156	-6.03125	-6.90625	14.3438	15.875	28.6562	21.3438	8.78125	-38.4688	0.90625	-1.96875	-6.53125	15.75	7	-21.5	-15.875	-20.125	6.8125	5.90625	14.1562	12.5938	-1.84375	0.01558	30.6875	-20.0312	11.1875	8.9375	13.6875	8.8125	-18.6875	-0.75	16.0625	16.125	45.7812	9.4375		0.01558
0.01562	11.2188	10.5938	-13.4062	-2.5	3.34375	13.0625	26.9062	-23.5	-18.5	1.0625	31.9688	12.9062	0.01562	-25.8438	9.1875	-20.0625	8.71875	-17.3125	-15.7188	-17.4688	10.9688	13.2188	18.2188	-26.125	-20.0625	-13.125	-26.6562	-26.5938	24.75	-2.25	14.9688	1.59375	-16.25	-28.4688	0.0156	31.1562	-0.03125	-11.0625	17.3125	-2.71875	30.6562	-14.1875	-18.5938	15.5312	-11.6875	-2.3125	4.28125		0.0156
0.01564	-9.78125	-11.3125	19.7812	-17.7188	10.7812	4.875	-17.4062	7.875	-2.15625	-1.71875	10.1875	10.2812	0.01564	1.84375	27.25	-14.0625	7.78125	1.1875	-25.5938	-12	16.5625	8.28125	-19	16.1562	2.46875	-18.125	15.875	18.375	-3.9375	-5.90625	-26.75	-5.21875	-24.7812	2.21875	0.01562	-17.875	11.375	17.6562	-25.4375	-26.4062	-16.7812	18.8438	-47.625	-14	-30.75	-25.375	12.1875		0.01562
0.01566	-12.3125	-15.8125	-10.375	-29.9062	-11	-18.4375	-11.5312	7	-47.2188	-5.40625	1.25	-33.6875	0.01566	-6.96875	16.5625	-4.25	-0.4375	36.9375	29.875	-6.4375	-17	-12.7188	-25.3125	22.0312	25.5938	11.9688	-9	-21.875	-29.2812	15.6875	-3.65625	-7.8125	-0.125	0.59375	0.01564	-9.5625	-25.9375	25.7812	-8.90625	0.625	-30.8438	-11.8125	24.9688	-11.125	34.625	-4.5	4.25		0.01564
0.01568	-6.03125	32.8125	-13.8125	-4.375	-2.78125	-14.9375	0.15625	14.5625	-1.09375	15.8125	6.875	-23.6875	0.01568	-18.9375	-21.25	10.5312	-46.3438	-18.25	-12.25	-25.4062	10.4375	-8.46875	40.4375	-20.125	16.875	-29.1875	-36.0625	-21.125	-5.625	-19.75	7.9375	-25.9375	-39.375	-46.3438	0.01566	10.2188	-3.5625	-2.90625	26.75	13.0938	1.21875	-25.5312	14.6875	-8.84375	-6.34375	20.375	2.84375		0.01566
0.0157	-15.1875	2.5625	20.1562	-7.625	16.0625	-6.1875	2.46875	10.7188	11.9688	0.375	7.15625	30.1562	0.0157	0.03125	-20.5	-55.5938	7.40625	-7.5625	-19.3125	-3.90625	-0.59375	-11.5	-31	-5.625	-21.7188	-7.25	-9.59375	-7.53125	8.96875	-15.2188	-11.6875	12.5312	-21.3438	-28.0938	0.01568	-10.5312	40.9688	-23.1562	-18.5312	11.1562	2.28125	9.84375	-21.6875	14	9	-40.25	8.90625		0.01568
0.01572	3.40625	-49.9062	15.9688	-7.71875	-20.9062	11.7188	-10	13.8438	-4.15625	-12.4688	-29.75	-18.0312	0.01572	9.65625	-2.96875	3.40625	9.84375	22.625	17.5625	-31.625	-24.4062	7.8125	-28.8125	5.96875	38.0625	4.34375	15.5	27.5	-54.4375	-4.5	7.5	-2.625	15.3125	0.0625	0.0157	-38.6562	19.1875	-10.125	-26.8438	22.5625	-51.6562	12.1562	-30.5625	-24.9688	-9.46875	13.3125	-1		0.0157
0.01574	19.0312	8.96875	2.96875	28.625	-39.7812	-38.875	-0.5	-33.875	-13.9688	-21.875	5.375	-1.75	0.01574	-32.6875	-3.5625	39.0312	-19.1875	-23.5312	-23.9062	-14.9375	-3.71875	10.5938	37.2812	-4.75	-3.25	-20.4375	-14.8125	-23.0625	-0.5625	-6	-8.09375	1.8125	-26.5	18.0625	0.01572	32.8438	-11.5312	44.7188	27.0938	0.78125	2.3125	-13.4062	-6.5	-12.375	-21.1875	-23.0625	-64.8125		0.01572
0.01576	-8.09375	-1.78125	-26.7188	20.4062	6.40625	3.5625	-8	-3.15625	4.96875	27.5312	8.46875	29.7812	0.01576	-17.9688	-31.8438	-18.2812	-30.3125	-20.0938	-1.4375	-23.5938	2.46875	22.1562	-33.1875	-15.1562	-25.0312	-26.6562	2.4375	9.21875	8.9375	12.9688	-22.5	-17.625	-16.75	-7.875	0.01574	2.96875	4.8125	12.75	-25.5625	-40.8125	17.375	-5.25	-0.78125	39	-0.8125	-19.5938	-32.5		0.01574
0.01578	0.96875	-56.25	6.40625	0	4.8125	9.6875	2.90625	5.0625	9.90625	-10.8125	-40.375	-12.0312	0.01578	16	-14.25	-14.25	-8.15625	4.34375	22.6875	6	-22.25	-6.5625	-41.3125	-24.9688	16.2812	37.125	29.4062	10.0625	-50.5625	-24.4688	-10.8438	-32.4375	17.9688	2.625	0.01576	-25.2188	-20.125	-17.7188	-10	-35.3125	-34.625	-34.8438	14.6875	-17.625	28.5625	-6.625	5.1875		0.01576
0.0158	8.84375	-0.5	-3.40625	-27.0938	4.46875	-16.625	-14.0312	0.15625	-13.0938	-36.25	-8.5625	-33.6875	0.0158	-44.0312	-3.90625	17.5938	-17.5938	-12.3125	-42.7812	-6.75	-7.28125	-7.03125	20.0625	9.40625	10.9062	-4.625	-18.4688	-25.1875	-5.34375	-12.5312	-7.75	-8.9375	-9.9375	5.125	0.01578	15.6562	-8.71875	4.96875	-10.1562	11.9688	18.9375	9.96875	18.3125	-9.78125	-20.4688	26.875	-30.8125		0.01578
0.01582	1.9375	16.75	1.15625	-5.125	13.5	27	-13.1562	-24.4062	-3.15625	17.375	46.4688	-12.875	0.01582	-18.7188	-38.2188	-0.96875	-42.25	-33.5625	-22.6562	-0.84375	20.9375	-15.0938	-7.96875	-11.5312	-14.5	-32.4375	-34.7812	-9.28125	2.9375	-16.7812	5.71875	-1.125	-14.2188	3.59375	0.0158	4.3125	-26.0938	-30.0312	13.1562	-6.90625	13.75	7.21875	-34.8438	16.0938	0.1875	-16.5312	-0.34375		0.0158
0.01584	-31.0938	-16.0312	23.75	-11.4062	-10.0312	27.8438	27.2188	12.0625	7.1875	-1.0625	-19.2812	4.03125	0.01584	14.25	-20.3125	-9.9375	12.8125	27.0625	18.5625	5.53125	3.71875	4.1875	-5.09375	-8.75	-7.3125	26.5625	10.9688	6.71875	-0.125	-14.4062	20.0938	4.875	7.9375	16.9062	0.01582	-16.4688	19.9688	-7.21875	4.71875	-11.5312	-23.9062	-15.1562	16.2812	-14.9375	10.5938	-8.21875	30.3438		0.01582
0.01586	-7.0625	-7.96875	4.1875	-29.9375	16.4688	-20.3125	-7.96875	-32.7812	-7.90625	-31.8438	9.96875	-23	0.01586	-7.25	-9.125	25.875	-23.625	-22.0312	-16.0938	-30.7812	-2.78125	-5.125	-11	-5.21875	32.9062	-17.6875	22.0312	-33.5938	-4.78125	-20.5312	-6.5	-10.5625	-15.5938	-2.09375	0.01584	3.09375	-11.5312	-7	27.625	0.09375	-1.46875	-7.03125	-1.5	-25.9062	8.15625	44.3125	-14.0625		0.01584
0.01588	-8.21875	41.25	3.21875	7.15625	-1.34375	14.8438	-32.375	-2.1875	-15.1875	37.8125	-10.4375	25.1875	0.01588	14.75	1.40625	-15.625	-37.625	-24.0938	-29.125	-12.4062	-4.34375	-28.25	30.375	9.21875	-14.2812	-26.4062	5.34375	-11.1562	-4.375	0.53125	-23.7188	5.65625	-48.2188	-16.7188	0.01586	16.1562	16.3438	9.34375	27.5	6.28125	20.7812	-20.875	-38.5312	15.625	-26.1875	-25.0625	-21.1562		0.01586
0.0159	-41.9688	-45.6562	5.09375	-10.25	-1.0625	27.0938	0.625	-0.21875	-19.9688	6.90625	-7.5625	-12.7812	0.0159	25.4688	4.46875	-26.5938	21.5938	9.96875	-15.5938	7.0625	-54.7812	-19.875	1.1875	13.7812	-16.7812	20.3125	-2.9375	6.3125	29.8125	13.4062	25.9688	8.125	-11.8438	14.625	0.01588	4.71875	41.2188	0.53125	-33.4375	5.375	-4.96875	8.71875	9.21875	-11.0938	15.2188	-7.21875	36.7812		0.01588
0.01592	4.09375	-30.9062	-2.46875	0.53125	-17.9062	-0.0625	6.4375	-11.125	33.0312	-18	-0.96875	-17.6562	0.01592	-13.25	-3.5	14	16.3438	-18.6875	31.9688	1.0625	-11.0938	8.59375	9.59375	0.8125	-8.96875	13.5312	-19.2188	-15.25	-3.96875	4.90625	2.71875	-14.0312	32.875	-19.4375	0.0159	-26.5625	-15.0312	-19.7188	29.5625	-10.4375	-15.5312	-15.5	-11.2812	-31.4375	-7.375	23.3438	2.6875		0.0159
0.01594	-8.125	11.4062	28.3125	-8.78125	-13	1.78125	-38.8438	-23.75	3.15625	-27.9062	22.0312	21.8125	0.01594	2.71875	-2	-8.90625	-13.2812	-40.5625	-19.7812	0.34375	7.9375	-30.9688	26.25	-6.625	-14.75	-47.125	-39.1562	-18.4688	19.2812	12.125	-37.5625	-4.28125	-25.3125	-15.125	0.01592	-3.6875	0.8125	12.875	4.78125	-23.6562	33.1875	-27.7188	4.4375	9.53125	-27.7812	-12.5	-37.9688		0.01592
0.01596	0.0625	11.3438	-27.2188	-18.9375	-5.15625	12.5625	-5.34375	19.75	-26	-3.4375	0.34375	17.2812	0.01596	14.0312	-8.75	-13.3438	8.59375	-1.4375	-3.25	-13.625	-9.03125	-16	-35.375	-15.9688	-8.34375	-26.0312	-10.5938	2.46875	4.21875	-6.46875	39.3438	0.21875	20.8125	4.59375	0.01594	15.2812	-19.0938	21.5625	-9.0625	23.9688	-32.9688	-14.7812	-4.6875	17.7812	18.625	-1.3125	0.78125		0.01594
0.01598	-4.78125	-16.2188	-20.75	26.5625	-8	-3.8125	32.9375	7.875	10.3125	-7.71875	-5.15625	-21.4375	0.01598	-41.3438	-5	7.21875	11.1562	-26.0938	30.1562	3.40625	1.96875	27.4062	-13.5312	7.1875	0.1875	29.8438	-18.4062	3.96875	-32.5	-14.0625	-16.8438	-10.375	33.5	3.53125	0.01596	37.8125	17.1562	-20.9062	9.5625	-5.53125	-19.25	8.53125	26.2188	-26.625	-15.9375	6.625	11.9375		0.01596
0.016	1.75	7.625	-1	16.4375	12.125	-6.125	-19.125	-23.7812	10.5938	3.90625	13.9062	-9.34375	0.016	-6.6875	7.4375	-3.84375	-23.125	5.5	1.625	-2.09375	37.875	-11.3125	-11.5625	-3.21875	-43.7188	-34.7188	-27.9375	-22	-9.03125	-9.09375	-17.6562	0.25	-24.5625	-12.5	0.01598	-36.8438	-14.0938	-0.53125	-6.5	-4.34375	6.71875	20.3125	-21.625	13.4375	-34.9062	-16.5312	-14.9375		0.01598
0.01602	8.3125	-15.7188	-18.25	5.84375	-0.78125	-25.125	4.21875	8.84375	-19.0625	12.375	-6.78125	-5.90625	0.01602	7.8125	-3.8125	-7.875	-7.40625	25.2188	-3.1875	21.6562	-4.59375	-19.8438	-43.0938	-5.84375	-7.5	12.2188	-17.3125	-0.8125	-11.5625	0.8125	12.3125	8.9375	20.9688	-23.3125	0.016	-17	-23.5938	-38.2188	-24.5938	9.90625	-33.125	-8.1875	-16.1562	11.9375	2.28125	5.84375	13.5		0.016
0.01604	-7.625	-4.53125	12.9062	-3.40625	-4	15.5	16.3438	-34.2188	-18.9062	10.7188	19.9688	4.96875	0.01604	-32	9.875	19.4062	30.8125	-35.3438	16.8125	7.59375	-39.125	26.4688	-2.21875	-9.8125	32.625	40.7188	2.96875	18.7188	-1.78125	19.2812	-2.8125	12.3125	17.4375	3.28125	0.01602	-2.6875	-0.96875	-6.5	-17.75	-19.4688	12.0938	-10.5938	24.4062	28.0938	-4.625	-12.4375	-7.28125		0.01602
0.01606	-12.0625	16.9688	35.0938	11.1875	11.9375	-0.15625	-9.6875	-20.5938	29.0312	7.6875	-8.65625	-3.28125	0.01606	-35.8125	-41.4375	-35.25	-28.7188	-36.3438	-6.8125	-23.9062	39.0312	-23.7812	28.4688	7.40625	-37.5938	-34.7188	0.34375	-13.375	2.34375	18.875	-38.125	-35.9375	-25.3125	-20.9375	0.01604	5.75	-1.75	-9.25	5.375	-7.46875	-2.5625	30.4688	-27.5625	7.84375	-12.625	0.46875	-25.7812		0.01604
0.01608	-4.9375	14.4375	6.25	-14.4062	-1.5625	5.375	1.5	17.9375	-30.6875	-9.25	-35.0938	-7.875	0.01608	6.625	-27.2188	-12.625	2.15625	2.96875	-33.2188	-11.0625	-14.75	-40.125	29	-10.7812	-9.0625	-25.125	2.40625	15.5938	-20.8438	-36.125	4.53125	-3.53125	-24.375	-11.0625	0.01606	13.8438	-29.875	42.5938	-19.9688	3.03125	-18.4688	-16.6562	10.7188	-6.875	-28.2812	0.15625	9.0625		0.01606
0.0161	10.9062	-7.40625	-21.5312	1.28125	-7.84375	24.1562	6.96875	31.25	-28.5625	2.84375	-0.1875	-22.0312	0.0161	-5.28125	29.8438	-9.40625	28.3125	8.34375	4.59375	3.40625	-24.75	33.5	-27.9688	-42.75	6.40625	16.5625	24.7812	22.2812	-12.0625	-4.625	-7.21875	-5.15625	24.4062	-6.78125	0.01608	15.5312	12.1875	-0.40625	23.5	9.59375	-3.15625	-34.7188	-4.59375	-7.5625	16.6562	-16.6562	7.125		0.01608
0.01612	0.625	-12.9062	24.7812	17.2812	29.1875	-5.59375	-12.625	-11.5938	13	1.75	-17	-11.2812	0.01612	-41.25	31.75	0.1875	-19.25	23.625	-10.125	-4	34.75	-8.8125	22.1562	14.8438	3.9375	-9.125	-28.6562	14.4375	22.1562	-12.8438	-15.5938	-37.25	-12.0938	-5.8125	0.0161	4.21875	2.3125	-39.4375	-12.9375	-16.1562	13.375	17.2812	7.78125	19.625	4.15625	1.21875	6.28125		0.0161
0.01614	3.1875	18.9688	-13.9062	-53.1562	39.5	-22.625	-20.75	9	4.1875	-25.125	-9.75	-30.0312	0.01614	17.9062	21.3438	9.625	-29.9375	-5	-19.5312	-36.5	7.09375	-26.0625	5.0625	-4.4375	-21.8125	-20.7188	1.1875	23.8438	-8.5	-16.625	32.5938	27.2188	-23.625	-20.9688	0.01612	6.15625	-1.28125	-1.21875	-19.9062	-28.5938	-7.5	22.5625	-22.5	-25.9375	17.0938	4.46875	-11.125		0.01612
0.01616	13.9688	-7.21875	-37.25	-6.90625	-54.1875	10.9062	20.2188	47.2812	-42.8125	-4.25	5.90625	-28.8438	0.01616	9.875	66.625	-13.9375	8.34375	-9.5	15.4688	-3.25	-30.4688	3.78125	-33.4062	-18.3438	15.0938	18.8125	4.96875	-2.21875	-22.0625	4.5	19.3125	52.1562	0.84375	-11.9062	0.01614	-2.53125	-24.4062	-20.375	-2.96875	20.4062	-3.84375	-21.2188	2.3125	-6.59375	18.8438	-6.46875	-1.6875		0.01614
0.01618	-21.75	10.75	2.46875	50.8125	5.40625	4.53125	-2.03125	-5.1875	-35.9688	27.875	5.1875	23.6562	0.01618	-6.6875	13.75	23.875	-5.90625	7.84375	0.59375	-17.4375	-0.65625	0.4375	-0.84375	4.28125	0.8125	11.6562	7.59375	24.1875	9.4375	22.375	-22.0312	-36.5312	-5.75	17.2188	0.01616	-15.6875	2.71875	-11	9.625	9.90625	17.1562	-8.65625	5.21875	7.96875	-18.5312	-27.0625	4.9375		0.01616
0.0162	-24.9375	-7.78125	13.5	-22.2188	44.9688	-17.6875	-0.09375	-0.28125	7.25	-17.2188	-24.0625	-3.875	0.0162	0.46875	-21.0625	-33.5625	-28.5938	12.6562	-17.4062	5.5	-28.8125	-16.5	13.0938	-2.90625	-36.625	-33.6875	9.9375	-10.2188	-13.9375	-6.3125	-0.15625	-19.8125	-19.9688	-6.78125	0.01618	-28.4375	-34.875	-8.5	-18.1875	-26.9375	-24.5	-13.5312	-23.2812	-15.7812	-24.2188	-3.3125	1.09375		0.01618
0.01622	-7.8125	4.125	-38.5625	-23.25	-39.625	0.15625	12.9062	-5.59375	-21.7188	-12.375	-12.25	-9.25	0.01622	13.75	14.4688	0.59375	9.03125	37.1562	9.46875	-9.75	-33.0938	3.71875	-24.6875	-4.40625	-39.6562	-3.3125	-3.4375	-6.96875	-19.1875	-5.6875	21.375	14.4062	-18	-7.90625	0.0162	29.375	-13.5312	3.9375	-33.2188	-6.5625	-14.5	-12.9062	7	-24.9375	-6.4375	1.40625	-7.9375		0.0162
0.01624	5.40625	14.4062	-7.34375	7.15625	-6.125	-18.3125	-6.8125	-19.1875	19.4375	0.34375	33.9375	27.75	0.01624	-52.1562	-11.125	-2.75	15.2188	-9.4375	9.40625	-37.5938	23.875	22.125	-15.6562	-4.5625	6.15625	7.21875	-41.7188	15.9688	11.9375	5.53125	-31.5625	1.8125	13.0312	-10.8125	0.01622	8.96875	9.8125	11.8438	10.8438	-15.2812	-13	-0.3125	4.96875	19.2812	24.375	-7.75	-18.625		0.01622
0.01626	-9.34375	-12.875	14.7188	-7.375	13.6562	-35.8125	-0.40625	7.375	9.6875	-7.25	-8.15625	-17.3125	0.01626	-20.0625	1.1875	-21.5938	-5.6875	-11.8125	-8.84375	-6.875	6.0625	-16	9.78125	4.71875	-27.5	-19.9688	11.7188	2.4375	-22.9062	-23.4688	-14.25	-20.2812	-40.2188	2.90625	0.01624	-6.5	21	-3.46875	-4.40625	-19.9688	-7.53125	-33.3438	-19.7188	-12.2188	-22.7188	5.71875	-12.5		0.01624
0.01628	-5.625	-16.1875	4.75	16.6562	-39.0625	-1.40625	-22.2812	0.03125	-16.5	-13.3438	-13.8125	-19.1562	0.01628	16.75	-16.375	7.90625	7.6875	-14.0625	4.15625	-16.7812	-30.625	-18.7188	-35.5625	-11.875	-12.875	-10.4375	11.9375	-12.9062	-16.2188	3.0625	11.0625	0.0625	-27.9062	-10.8125	0.01626	4.0625	-11.9688	24.4062	-15.6875	-11.2188	-24.3125	-5.53125	6.34375	3.65625	0.84375	-15.0625	-1.25		0.01626
0.0163	33.5312	14.3438	0.46875	50.5625	-10.4375	-24.875	-23.6562	-13.5	5.5	-15.125	10.4375	3.375	0.0163	11.2812	-17.5938	-0.9375	-23.7188	-18.4375	-24.2188	-28.7188	19.125	41.5312	10.5	-13.6562	2.59375	12.3438	-27.7812	-15.2188	-20.5	8.53125	-39.6562	-14.8438	34.5625	3.90625	0.01628	-30.6875	-14.25	-1.96875	17.7812	-10.4062	11.25	11.5312	8.25	3.03125	7.875	12.9375	-16.0312		0.01628
0.01632	-32.625	-5.28125	11.5	-10.5	32	0.5	-14.4375	-10	24.1875	4.84375	7.8125	9.53125	0.01632	-3.71875	-18.4375	-11.375	-36.2188	-13.6875	-0.0625	-21.5938	-0.25	-16.5625	2.15625	2.09375	-1.3125	-13.75	-39.5312	-5.5	0.40625	-17.4375	-27.5312	-39.7812	-31.5312	19.7812	0.0163	27.9375	18.125	11.1562	-21.8125	-2.96875	15.9062	2.28125	-26.1875	-13.7188	25.5312	-0.125	-23.0625		0.0163
0.01634	-25.5312	3.9375	-6.09375	-4.40625	-15.5938	-20.9688	3.96875	9.53125	4.71875	-29.875	-40.625	-9.875	0.01634	-2.625	2.9375	9.375	-6.75	-27.0312	4.78125	39.75	-29.125	-11.625	-11.6562	-11.9688	-29.2812	3.53125	41.8438	-24.1875	-3.625	-28	17.3438	14.0312	-17.9375	1.75	0.01632	-7.03125	14.7188	-35.0938	4.96875	18.0938	-40.125	11.4688	-9.28125	-12.7812	-19.0625	0.8125	1.4375		0.01632
0.01636	5.4375	-3.5625	8.8125	4.125	-12.625	0.75	-32	-31.2812	-12	-48.6875	20.8125	8.375	0.01636	-30.3438	-24.0938	26.7188	-4.75	-37.2812	-18.9062	-25.4062	-20.9375	23.9062	0.15625	-35.8125	-3.875	23.5938	-2.25	19.9375	-0.46875	2.53125	9.0625	0.40625	33.2812	-10.4688	0.01634	-10.125	-4.25	13.125	3.375	14.5625	41.5938	-6.28125	-9.59375	7.96875	-31.2188	-25.5938	-20.5938		0.01634
0.01638	-1.125	20.25	19.4062	-5.46875	36.9375	25.2188	-1.4375	-16.25	3.71875	-6.0625	1.78125	3.03125	0.01638	-11.0938	-3.65625	-44.9688	-30	15.0625	-21.5	-3	41.75	-52.4375	23.8438	10.3125	9.09375	-33.375	-28.4062	-3.25	4.8125	-31.125	-14.0312	-42.7812	-3.875	21.7812	0.01636	-35.9688	-0.34375	-10.6562	4.09375	-24.1875	29.5312	-11.375	-30.3125	-25.4688	-1.28125	-19.5312	0.25		0.01636
0.0164	-2.78125	-9.78125	0.5	7.65625	-5.25	5.21875	-3.8125	14.6875	-4.25	7.34375	-8.90625	-30.5312	0.0164	22.5625	0.40625	-1.96875	15.7188	23.3125	-30.4688	31.0312	-32.4688	-30.9375	-5.34375	10.1875	-12	-6.65625	8.125	-8.5	-10.4062	-20.125	12.3125	18.4375	-4.375	-20.8438	0.01638	-23.0938	-29.6562	-29.7812	-17.7188	6.3125	-9.34375	9.15625	-7.0625	2.8125	11.0625	25.9062	15.5625		0.01638
0.01642	-7.96875	9.15625	5.59375	14.5625	-11.4688	-35.3438	-0.5	-10.9062	-37.9688	-4.3125	13.8125	-24.5	0.01642	31.6875	-22.6875	36.5625	16.5938	-21.25	14.125	5.125	-23.5	21.1562	2.3125	-26.25	-1.78125	10	0.8125	3.09375	-4.78125	6.90625	15.5938	12.75	14.2812	-10.75	0.0164	45.4375	0.65625	12.5312	-9.78125	-22.875	1.5625	-5.8125	14.0938	0.375	-20.125	-2.40625	2.9375		0.0164
0.01644	27.5938	20.7188	-26.625	2.46875	29	9.96875	14.625	-26.8125	10.375	17	13.75	9.84375	0.01644	-5.59375	1.96875	-33.1562	-3.46875	-3.71875	19.5625	0.59375	26.6875	0.5625	6.40625	7.6875	24.3125	-14.5312	-28.875	-18.2188	19.125	-9.6875	-21.9688	-13.2188	-9.15625	16.25	0.01642	-19.625	4.28125	-8.78125	-1.78125	2.34375	-5.46875	-7.375	13.5	-16.375	-6.8125	-22.2188	17.5625		0.01642
0.01646	-31.6562	-3.625	-0.09375	-1	-14.875	16.875	-25.3125	18.625	-5.84375	22.2188	-13.25	-5.0625	0.01646	12.875	14.9375	-24.4062	-3.4375	18.875	-6.5625	-14.5938	-22.7812	-16.6875	-16.75	30.7188	-5.375	8.71875	2.90625	14.4375	-26.3438	-0.75	50.25	28	-15.2812	-14.9062	0.01644	-24.0938	-25.1875	-20.4688	-28.4062	15.2812	15.6562	-16.8125	17.3438	15.375	28.25	12.6562	0.40625		0.01644
0.01648	-15.7812	-0.1875	-4.59375	2.21875	-21.2812	-13.3125	-2.71875	0.15625	17.9688	0.96875	-6.625	6.46875	0.01648	-12.75	-25.375	20.3125	3.84375	-23.5	3.34375	-6.6875	7.09375	11.125	-12.4375	-27.875	-2.71875	1.0625	-0.71875	11.2188	8.78125	-22.375	35.9062	8.9375	22.75	-34.9375	0.01646	0.5625	-18.75	-11.5	2.1875	8.09375	-15.0625	-1.46875	-1.96875	-6.5	-20.2188	-16.5625	-19.7812		0.01646
0.0165	18.9688	2.8125	-8.5	3.96875	-8.8125	6.4375	-8.34375	-10.8125	42.0625	-8.65625	13.4688	9.8125	0.0165	-7.40625	-4	-36	-11.5312	-39.4062	-9.4375	19.5938	35.5938	0.9375	13.75	12.7812	1.0625	-27.9062	-36.6562	-9.125	26.4062	30.625	-20	-45.0625	5.21875	-18.7812	0.01648	-7.59375	32.8438	12.375	6.96875	24.5938	0.625	-12.9688	-45.1562	-14.1875	-31.375	-24.7812	-11.8125		0.01648
0.01652	-4.5	1.375	-25.8125	-45.3438	8.5	11.9375	2	-1.375	-6.5	11.2188	-28.4688	-7.5625	0.01652	-13.5625	22.4375	-42.3125	-19.0625	20.9375	-16.6875	7.15625	-12.8125	-34.8438	-30.0938	10.2812	-21.2812	5.1875	-3.90625	-11.6562	-39.2812	-9.0625	11.2188	2.40625	-4.5	-9.3125	0.0165	-10.125	-1.0625	7.21875	-8.09375	1.59375	-23.2188	2.4375	16.2812	-5.25	10.875	9.375	17.3438		0.0165
0.01654	-5.1875	0.4375	5.53125	29.9688	3.875	-23.375	4.34375	-9.75	-23.5	-24.375	-31.375	-11.8438	0.01654	-14.6875	-31.5312	12.8438	11.9062	1.84375	4.8125	-21.75	-20.3125	4.75	-3.25	-17.375	-23.5625	-5.75	-1.09375	-26.2188	6.40625	6.0625	17.8125	23.375	37.5625	-15.5312	0.01652	15	-18.7812	-12.4375	18.2188	-28.6875	-16.1875	-20.625	13.4375	19.1875	11.625	5.65625	-9.09375		0.01652
0.01656	21.4375	-13.4688	17.0312	5.5625	-8.59375	-7.53125	-6.25	-0.25	-15.4375	0.9375	18.5625	11.5938	0.01656	-12.4062	-4.09375	-8.0625	15.7188	-0.84375	-6	-17.5625	32.4375	-1.53125	6.84375	-29.9688	3.6875	-18.8438	-11.75	-20.9062	7.09375	5.0625	-18.7812	-13.1562	27.6562	-12.5625	0.01654	17.9062	17.625	19.9688	-13.3438	9.6875	12.3125	-5.78125	-7.28125	-30.4688	-20.1875	-31.2812	-20.9062		0.01654
0.01658	21.5938	-19.4688	-13.6875	-22.5625	4.1875	13.75	30.5	26.9688	12.3125	-21.4375	-13.0938	-18.75	0.01658	-18.0625	33.8438	-8.125	9.96875	-0.78125	-4.90625	2.46875	-16.8125	1.9375	-27.7812	-8.5	-16.5312	19.5312	3.9375	-2.78125	-10.1562	3.21875	-22.25	-6.46875	-37.9688	5.75	0.01656	-40.0625	17.375	-38.375	-22.25	5	-25.7812	8.875	14.0312	-21.4688	-1.4375	-4.21875	16.75		0.01656
0.0166	-13.125	-14.5938	-13.1875	-5.53125	5.4375	-17.0938	56	-13.9688	3.40625	-17.5938	8.8125	-18.1875	0.0166	0.90625	7.21875	19.8125	-27.9375	16.5625	14.2812	-4	-25.0312	-15.7188	-10	-25.25	10.25	17.5625	16.5938	2.90625	-20.4688	-45.4062	8.65625	21.8125	31.125	-34.9062	0.01658	8.5	-17.9375	-11.9688	14.6562	-15.2188	29.4062	15.1875	-4.125	-5.8125	9.6875	30.2812	2.875		0.01658
0.01662	-15	21	11.2812	24.5625	21.375	-19.2188	-14.3438	10.2188	8.84375	-1.3125	2.875	-7.125	0.01662	-15.4062	-6.5	-6.53125	-15.875	-32.1875	-11.4062	-24.1875	38.3438	5.65625	13.4062	-8.125	9.40625	-15.1562	-2.03125	19.9688	-22.0312	-13.6562	-9.4375	-31.9688	33.375	13.875	0.0166	-32.4062	3.5	7.21875	-11.1875	-8.40625	13.875	-3.9375	-15.0625	12.25	-17.4375	-24.3438	-21.1875		0.0166
0.01664	8.8125	2.4375	-17.875	-30.25	-31.0312	13.9062	1.6875	11.2188	-26.5	15.6562	-14.7188	9.65625	0.01664	-2.375	-6.6875	-16.3438	-9.25	-4.28125	-24.9375	9.40625	4.1875	-12.5312	28.1562	-1.5625	-28.2188	8.9375	-16.4688	-10.75	21.3438	18	-8.40625	-23.8438	-46.5312	26.4375	0.01662	-7.4375	-18.3438	3.0625	-4.5	8.46875	-18.5312	-10.4375	-15.3125	6	1.9375	-0.25	11.3438		0.01662
0.01666	-5.125	-14.9062	0.25	-17.4375	6.0625	17.5	15.375	-18.5625	7.09375	48.2188	11.25	-34.5312	0.01666	-10.5938	-37.75	32.9062	1.4375	60.875	13.1875	-15.3438	-34.0938	-3.90625	-10.6875	16.6562	-8.25	3	3.6875	-10.625	7.625	3.15625	14	13.625	-16.9062	-21.1562	0.01664	-24.2188	-14.8125	-16.25	19.5	-20.625	-18.4688	12.8125	27.1875	-10.4375	14.1562	9.84375	-11.6875		0.01664
0.01668	-10.375	10.75	45.0938	2.75	20.0938	-16.375	18.5938	-21.6562	-22.2188	-0.5	25.5625	-6.21875	0.01668	-11.5625	-34.0625	0.9375	-26.25	-24.5312	-6.28125	-6.6875	2.59375	1.46875	-13.875	9.75	7.40625	-13.1875	-12.75	4.1875	3.90625	-16.375	12.1875	-9.46875	-8.1875	-23.3125	0.01666	4.28125	15.9688	15.8125	-23.7812	-4.8125	12.0938	-15.8125	-24.1875	-22	-13.5312	16.375	-14.5		0.01666
0.0167	-19.0938	-27.75	-5.125	-41.7812	5.5	5.65625	-17.625	5.53125	-26.1875	-6.6875	-0.0625	-1.53125	0.0167	3	-2.5	-32.4062	5.78125	-32.5938	-29.5625	17.5938	-11.8125	-20.2188	15.4375	9.8125	-19.8438	-31.2812	-2.21875	0.1875	-15.7188	0.75	10.2812	-24.7812	-22.3438	5.21875	0.01668	9.28125	15.8125	-11.3438	-13.9375	13.625	-15.2188	-24.3125	-30.625	-9.875	11.6562	-33.3438	11.0625		0.01668
0.01672	2.1875	-21.2812	-26.3438	-5.0625	-22.25	-4.875	8.625	17.9375	-20.9688	24.7188	-16	-4.8125	0.01672	1.5	-18	13.9375	3.75	11.625	23.3125	-18.5938	-34.375	7.3125	-20.9688	-34.8125	13.9375	11.6562	40.9375	-5.125	5.5625	2.1875	-13.8125	24.9688	-29.0625	3.5625	0.0167	-1.625	-20.75	-10.6875	21.8125	-1.5	-26.0312	-15.7188	0.96875	3.03125	9.21875	-15.8438	15.8125		0.0167
0.01674	-16.9688	-0.15625	16.5938	32.9375	-3.4375	-4.15625	1.40625	-6.46875	9.15625	17.4375	6.125	-48.7188	0.01674	-9.5625	5.21875	28.0312	-8.78125	-1.46875	11.5625	-26.8438	-6.59375	-18.125	-3.46875	-3.4375	-0.375	-17.7188	-15.5625	-29.875	-8.46875	-11.625	-32.5312	18.125	12.875	-24.6562	0.01672	12.3125	-0.8125	25.125	-11.5	-43.1562	23.2188	-15.75	-40.4688	24.5625	17.8125	-15.8125	-40.4062		0.01672
0.01676	5.84375	-21.0312	29.5	-42.3438	6.4375	8.03125	-7.6875	-6.03125	-16.3125	-12.6875	-17.4375	7.5625	0.01676	-12.125	8.15625	-24.8438	-1.90625	-20.625	-15.9062	21.7188	-14.5	-16.625	4.5	35.3438	-37.3125	-3.96875	-3.375	-16.9375	-17.125	-5.5	-0.875	-18.6875	-24.8438	14.8125	0.01674	9.34375	-21.7812	-17.5938	-14.6562	4.1875	5.5	12.2812	19.5	-14.1562	3.8125	6.0625	14.9375		0.01674
0.01678	-5.75	-23.4375	-15.9062	-43.0938	-2.65625	-11.9688	6.71875	5.5	-15.3125	8.09375	-0.8125	33.5312	0.01678	12.4062	-34	-5.4375	13.1875	-8.25	-4.5	-1.34375	-24.6562	37.0312	-40.0625	1.5625	-3.5	-2.96875	-2.875	-22.4375	-15.0938	4.21875	9.78125	-11.25	-21.7188	14.2812	0.01676	18.4375	8.15625	-27.125	15.625	-19.1875	-42.5	0.40625	18.5312	-25.9062	-10.9062	38.0312	19.5		0.01676
0.0168	0.6875	11.4062	10.5938	35.8438	-32.9688	-23.5625	-10.7188	-16.4062	30.0625	10.4062	35.0312	11	0.0168	-12.0312	-17.6562	10.9688	1.96875	-3.8125	9.9375	-48.9688	-7.375	21.75	-23.5	26.1875	-5	-8.4375	15.6562	-20.25	-24.9688	14.8438	-17.8125	2.8125	6.5	-18.5938	0.01678	-6.46875	7.71875	27.4375	15.7812	-25.4062	9.5625	-15.0312	-19.4688	-8.3125	-8.125	-12.4688	-4.84375		0.01678
0.01682	-16.5312	12.875	41.0938	4.09375	12.0312	-14.2812	8.09375	2.40625	-12.5312	-16.6562	-37.9375	-9.53125	0.01682	-8.15625	14.5625	-6.6875	-5.65625	-26	4.46875	-2.71875	18.5625	-15.2812	18.5625	-0.1875	-4.78125	-7	-43.5625	1.75	-10.4375	-16.4375	-11.625	-25.2812	-20.5	-11.3125	0.0168	-20.9062	-22.9688	2.125	12.4062	2.4375	16.5	-4.40625	3.96875	-4.09375	-10.0312	-3.71875	6.625		0.0168
0.01684	5.84375	-37.375	-48.0938	-14.625	-15.0312	-20.6875	-9.1875	38.1562	-14.3438	-15.375	19.9062	44.7188	0.01684	14.3125	-17	-3.21875	11.2812	1.84375	-32.0312	35.8438	3.3125	-14.0312	-7.78125	2.84375	-7.5	21.0625	-1.78125	-12.375	3.21875	-7.375	7.09375	-22.5312	-7.40625	24.125	0.01682	-9.90625	16.5625	-23.9062	-8.5	36.1875	-17.8125	7.53125	-0.40625	21.2812	-22.125	3.1875	-5		0.01682
0.01686	14.1562	9.34375	25.75	36.6562	-9.65625	19.5625	-52.2188	-39.0625	19.0625	13.4688	27.0312	-9.0625	0.01686	-23.6562	-24.4688	-11.75	-20.4062	3.21875	-6.1875	-24.7188	0.9375	5.5625	5.15625	-0.40625	19.5938	-2.71875	11.8125	13.6562	10.4375	-16.9375	-27.8438	-14.4375	40.0625	-13.4062	0.01684	-2.84375	-5.1875	3.375	-19.0625	-14.6875	4.96875	-33.4688	-10.5625	-16.5	-13.8125	-24.5625	-14.4062		0.01684
0.01688	-23.4688	-14.2812	39.5	24.75	-12.7188	11.4062	-4.1875	-37.125	6.65625	-20.375	-21.4688	-35.2188	0.01688	4.65625	-0.25	14.3125	-12.3125	-13.3438	-20.6562	-3	45.4375	-23.1875	27.5312	19.5	0.4375	-19.0938	-17.625	15.9688	7.125	-18.75	-20.4062	19.6875	3.875	7.75	0.01686	-12.5312	-22.5	15.0938	-3.0625	-10.75	4.5	16.9375	-10.7812	4.34375	8.34375	-2	4.03125		0.01686
0.0169	8.375	-3.75	-32.5	-27.4062	2.09375	-16.5938	-7.3125	11.8125	-4.15625	15.25	-27.1875	-13.0938	0.0169	35	-30.1875	1.90625	13.8125	-5.5	-13.1562	30.125	3.75	-20.4062	-13.7188	-35.8125	5.40625	4.65625	-11.0938	-4.53125	2.59375	6.46875	15.5938	-8.78125	-11.125	11.6562	0.01688	-18.9688	-15.0938	-31.8125	-10.0625	4.59375	-17.375	-0.65625	5.875	7.90625	-13.4062	14.1562	1.0625		0.01688
0.01692	40.8438	24.5312	21.9688	43.375	26.6875	18.7188	-15.5625	-2.25	-0.5625	-16.9375	7.84375	-1.375	0.01692	-26.8125	6.46875	-28.9688	-22.125	-16.375	18.375	-15.5938	6.75	-10.7812	-6.3125	-18.6875	8.40625	0.9375	14	-5.375	19.7188	1.21875	11.3125	13.5312	10.4062	-18.1875	0.0169	26.5	24.9688	-10.5	-13.8125	33.5625	-8.5	2.09375	-13	3.5	-11.3125	-7.125	-11.25		0.0169
0.01694	-24.6562	31.9375	13.5312	0.40625	25.9375	32.8438	-1.1875	-12.875	11.625	-7.59375	-29.9062	-16.25	0.01694	-9.5625	-14.125	-4.75	-32.7188	1.9375	-7.96875	2.46875	18.7812	-26.375	9.4375	55.1875	2.4375	-14.5938	-5.9375	3.9375	-6.0625	-15.9375	-40.4688	8.6875	-5.0625	-16.7812	0.01692	-17.0625	-18	14.9062	-17.0625	-0.15625	-1.53125	-9.875	-30.1875	-18.8125	22.375	0.4375	3.25		0.01692
0.01696	1.34375	-21.4062	-8.75	-17.5312	6.3125	1.03125	19.4375	10.2812	-26.25	-18.25	-13.6875	-30	0.01696	45.4375	-4	3.6875	2.9375	8.96875	-28.0312	16.375	-3.5625	-14.9375	-17.25	-15.9062	-13.7188	-3.21875	-20.5	-24.9062	-1.5	-16.0625	9.15625	-10.7188	-10.5938	19.4688	0.01694	10.6875	-16.5	-9.90625	23.625	-8.34375	2.59375	-21.0625	16.1562	-19.5625	-14.5938	2.75	12.0625		0.01694
0.01698	3.4375	-1.65625	-10.25	8.53125	-0.46875	-6.5625	-8.4375	5.28125	-8.46875	3.03125	23.6562	8.125	0.01698	-36.0938	30.0312	-6.96875	7.96875	-8.15625	15.7188	-9.40625	6.625	17.5312	-9.5625	-14.6562	-0.71875	31	-18.2812	-9.21875	-13.9375	7.5625	16.4688	-3	12.5312	1.9375	0.01696	11.1562	23.4375	-4.90625	-7.46875	-35.4062	10.6562	22.0625	-14.8125	-23.4688	-18.4688	-28.6562	-13.25		0.01696
0.017	1.59375	15.9688	-0.9375	-17.7812	20.3125	22.9375	-18.4375	-8.78125	-3.1875	0.53125	-18.7188	9.125	0.017	-18.4375	0.625	-25.875	5.40625	1.1875	1.96875	-0.75	-5.1875	2.40625	32.875	14.5938	15.0312	-19.0938	6.84375	3.46875	14.4062	6.8125	-31.625	0.65625	-6.90625	-26.2812	0.01698	-11.3125	-24.125	4.0625	-6.53125	1.21875	-30.7812	3.78125	-12.9062	-17.75	-11.1875	-1.21875	-1.28125		0.01698
0.01702	-15	-12.625	-25.8125	-15.7812	-16.25	-11.1875	30.2188	27.7188	-11.5625	-21.9688	-13.3125	-9.21875	0.01702	36.0938	-8.65625	-3.625	12.0938	19.3438	-20.2188	14.5312	34.875	-25.0938	-17	-27.875	-16.9062	-32.0312	-7.40625	-1.34375	-29.7812	-10.875	-25.9062	7.09375	-23.125	-16	0.017	15.75	-30.5	-28.25	-9.59375	-21.875	-5.84375	1.59375	24.4688	11	11.9688	-1.15625	15.75		0.017
0.01704	-23.25	-42.0625	-12.7812	18.2812	-17.7188	-18.9688	-6.375	6	-20.5938	-6.65625	24.2812	11.875	0.01704	3.96875	-2.875	-13.9688	20.5938	-15.6875	22.375	-37.75	-9.53125	12.125	9.5	-11.5625	-49.2812	-12.5	-16.3438	-22.0938	15.5938	21.25	26.3438	-0.6875	2.28125	-4	0.01702	8.5625	28.5938	1.4375	3.59375	-3.75	23.875	-3.1875	-14.8125	-7	-5	-8.875	-9.8125		0.01702
0.01706	-1.25	10.4062	-20.125	11.2812	20.8438	32.7188	-6.875	0.5	3.84375	12.1875	12.9375	-0.21875	0.01706	-38.8125	15.2812	-12.75	-15.5312	-7.375	20.4062	-21.625	23.4375	7.21875	-0.8125	5.90625	31.4375	8.40625	-9.34375	19.6562	-3.65625	9.9375	-4.4375	-17.5625	2.21875	-49.125	0.01704	-45.4375	-29.3438	17.875	-0.75	17.5312	10.875	8.75	-28.125	-24.5625	-7.9375	-22.0312	18.6562		0.01704
0.01708	6.375	-0.84375	-11.9062	-38.9688	-12.5938	-0.03125	-12.4375	11.0938	12.125	-10.9062	-7.875	-14.7188	0.01708	3.46875	-10.3125	7.4375	14.4688	16.1562	-53.5938	9.375	2.5625	-15.25	40.0312	-5.375	3.40625	-19.875	-10.5312	9.46875	-38.9375	-23.4375	-17.625	10.0938	-6.03125	-11.8438	0.01706	-10.3125	-4.40625	-8.90625	-9.09375	-0.15625	-24.2188	26.2188	5.71875	-1.6875	-1.59375	12.0938	-9		0.01706
0.0171	16.4062	-28.9062	24.75	5.90625	-19.9062	-29.0625	0.3125	-26.5312	-32.8438	-14.4688	9.65625	-9.375	0.0171	-6.15625	5.8125	-1.53125	7.6875	-16	13.5	-35.25	-12.7188	-6.40625	-4.5	-45.9375	3.53125	12.75	-10.0938	-15.875	0.34375	13.6875	20.75	-6.5625	-9.96875	2.34375	0.01708	29.3438	6.40625	-6.375	-5	-2.96875	-29.75	-1.40625	12.125	9.9375	3.875	-4.375	-40.625		0.01708
0.01712	8.53125	7.09375	10.0938	-21.8125	14.6562	12.9688	2.78125	1.21875	5.78125	4.25	12.6875	2.78125	0.01712	-39.0625	12.0625	-11.1562	-17.3438	-14.0312	17.5938	-19	33.8438	14.1875	8.125	13.8125	4.9375	4.53125	-7.625	-10.9062	-1.59375	-5.9375	-10.4062	-24.1562	18.1875	-8.65625	0.0171	-4.34375	-21.6562	-1.15625	-29.4062	-16.8125	-0.90625	-11.9062	-18.2812	-10.0938	-3.8125	-24.875	11.7812		0.0171
0.01714	-4.8125	-7.90625	-27.75	-51.5	0.40625	-26.7188	2.8125	36.3125	14.1875	-12.9688	-21.375	-35.4688	0.01714	2.40625	-1	3.34375	-23.0938	33.9062	-19.6562	11	-1.0625	-8.34375	21.8438	-9.3125	-29.625	-33.3438	0.28125	22	-32.5625	-37.5938	-32	5.90625	-30.6562	-14.9062	0.01712	-11.9688	-2.875	-6.96875	14.3125	-22.125	-26.0312	11.5625	-13.75	7.25	-2.46875	-2.4375	-1.90625		0.01712
0.01716	-8.25	-9.46875	18.7812	47.6562	-17.75	-17.4375	-10	5.84375	-23.8438	-18.7812	-27.0625	-7.78125	0.01716	-7.96875	-49.0312	0.09375	4.4375	-13.9375	5.25	-9.46875	-35.5312	0.4375	3.84375	-36.5312	-35.7812	5.15625	-6.15625	-37.0312	-19.9375	29.2188	-0.9375	-8.8125	-12.9375	26.1875	0.01714	20.9688	27.9062	26.5312	7.75	16.9375	5.8125	-8.5	10.4688	2.03125	10.3125	-7.78125	-30.625		0.01714
0.01718	-23.0312	-1.9375	1.8125	34.9375	13.2188	3.0625	-11.5625	-36.1875	-1.75	-23	26.375	20.1562	0.01718	-12.2188	9.21875	-3.6875	-23.875	-15.625	4.375	-9.5	-3.59375	6.03125	-3.59375	-3.09375	-20.6875	28.2188	18.9062	3.59375	29.75	3.6875	3.53125	-14.9688	-6.28125	5.4375	0.01716	-31.5938	1.125	-1.78125	-10.6875	12.2188	26.1875	-33.9062	1.375	-6.125	7.1875	-18.5312	-14.0312		0.01716
0.0172	7.9375	-8.75	-3.8125	-47.2188	13.8125	51.1875	0.53125	-1.46875	14.3438	0.46875	4.125	-24.3125	0.0172	4.9375	-15.5938	-9.5	-33.0625	9.4375	-31.4062	-4.5625	-7.3125	-38.5625	0.625	-2.84375	5.25	-8.6875	20.4375	26.4375	-18.5	-61.5938	-28.5938	16.1875	4.875	-18.75	0.01718	-13.5938	-17.4375	-39.8438	-11.7812	-27.625	-14.7188	13.4062	-12.4375	-25.4375	-6.21875	-16.125	23.4688		0.01718
0.01722	-14.75	-36.6562	0.25	-5.4375	-12.6562	-46.0938	-29.5938	7.90625	0.25	3.4375	-0.5	3.3125	0.01722	16.7812	-37	16.9688	20.5625	-3.8125	1.625	11.5312	-42.9062	-5.625	14.3125	-5.9375	-17.4062	-3.59375	-2.34375	-27.125	-30	4.21875	-14.75	4.15625	-10.9688	5.65625	0.0172	30.25	15.9688	16.4688	5.34375	-47.8438	-13.625	20.7812	3.84375	-11.875	-19.9375	24.9688	-22.4062		0.0172
0.01724	24.1875	18.2812	46.9375	6.78125	18.4375	1.75	-1.25	-43.1875	-21.4375	23.5938	-29.8438	11.0938	0.01724	-26.8125	5.8125	-3.59375	-11.9375	-6.125	6.96875	-3.78125	-15.1562	13.1562	-7.6875	-27.5625	19.3438	-5.625	-10.9688	-13.6875	32.6562	28.5938	25.25	-34.1875	-42.1562	17.625	0.01722	-9.96875	-32.0625	-4.90625	-3.4375	-6.21875	-5.3125	-5.03125	-1.375	10.75	-4.90625	-9.28125	-10.0938		0.01722
0.01726	36.5312	0.0625	-11.625	-28.1562	15.0312	23.625	4.4375	8.5	-5.5625	0.65625	-6.40625	8.15625	0.01726	18.8438	3.15625	8.9375	-6.65625	2.84375	-3.0625	-20.0938	1.8125	-21.7812	-23.375	24.0312	3.375	-22.25	-4.75	26.3125	9.1875	-29.9688	-19.625	11.4375	-7.375	-8.65625	0.01724	-23.6562	-18	-45.7812	-12.0938	-12.625	-0.78125	-22.9375	-22.6562	-26.25	33.3125	-22.4688	34.6562		0.01724
0.01728	-11.2812	-22.7812	-48.2812	3.125	-32.6562	-14.4062	-7.25	26.1875	29	1.375	8.375	7.25	0.01728	-0.46875	-11.0625	20.2188	12.1875	-16.375	-13.2188	-7.40625	-48.3438	11.2188	-21.5625	-11.4062	-7.84375	-10.9688	-0.71875	-26.1875	-45.6562	7.28125	15	14.4375	8.6875	-9.125	0.01726	29.4375	18.4375	17.3438	20.1562	0.625	1.96875	-12.3438	-30.0312	0.8125	-3.71875	28.5	-23.0625		0.01726
0.0173	-8.9375	2.28125	26.625	14.5625	17.9375	-21.0312	-1.96875	-35	-13.4062	-4.0625	10.5312	-15.5	0.0173	0.5625	10.5625	-54.5625	-3.34375	-18.5	14.0625	-21.0938	-4.125	23.25	-8.9375	-11.9062	35.1562	5.46875	-22.5938	-19.0312	-2.25	29.4375	-3.25	-50.625	-18.6875	15.9688	0.01728	2.0625	-13.0312	32.2188	9.8125	17.4375	5.4375	-0.40625	17.25	6.0625	0.90625	3.625	-5.15625		0.01728
0.01732	15.5625	-2	-9.6875	-47.2812	17.75	-5.5625	-9.53125	-15.2812	-6.78125	-28	13.5938	-11.9688	0.01732	21.5	-1.59375	16.4375	-4.96875	-6.5	-4.65625	-9.40625	23.9688	-20.5625	-12.0312	19.9688	23.875	-3.40625	-22.0625	2.65625	23.25	-20.625	-4.125	8.96875	-5.15625	-12.2188	0.0173	-36.9062	10.9688	-31.75	-44.9062	-16.5625	-9.75	-16	-13.875	-24.3125	-12.125	1.53125	5.21875		0.0173
0.01734	-7.90625	-18.8125	-27.0312	13.0625	-30.2812	12.9062	-8.625	17.6562	-4.5	39.9062	-4.4375	14.9375	0.01734	-13.4062	-34.125	12.9062	10.6875	16.7812	-32.5625	-12	-26.2188	-40.3125	-23.0312	-19.8438	-45.7812	-14.125	-0.3125	-2.78125	-35.75	-23.9375	2.15625	25.8438	18.0938	-12.9062	0.01732	-7.09375	19.7812	-20.375	-12.8125	18.2188	-30	-3.40625	7.71875	3.40625	-8.3125	-18	-22.4688		0.01732
0.01736	10.4688	5.09375	22.9688	19.9375	-17.3125	-1.34375	-22.375	-16.7812	30.4688	-22.3125	0.09375	4.9375	0.01736	0.28125	5.15625	-17.4062	-14.2188	-24.7812	4.625	-3.90625	-31.8125	35.2812	-10.4062	-20.5938	-31.375	-16.0938	6.375	-34.625	-2.0625	30.7188	-25	-27.4375	-7.625	9.21875	0.01734	5.25	-11.3438	45.1875	9.21875	36.7812	-6.1875	8.75	-19.5312	7.96875	1.5	-20	-2.125		0.01734
0.01738	23.3438	14.0312	8.875	-6.15625	23.125	-0.875	18.3438	-14.7188	22.875	-14.7812	-37.875	-10.5625	0.01738	26.5	25.2812	6.75	7.96875	-16.625	-14.5625	-1	32.3438	9.28125	-10.0625	-4.59375	10.0312	0.125	-9.65625	30.2188	46.1562	-44.7188	6.4375	-32.625	-13.4375	8.46875	0.01736	-23	-16.2812	-30.9688	9.09375	-11.6562	12.8438	-5.25	8.21875	2.5625	-7.96875	-5.15625	22.5312		0.01736
0.0174	-8	-1.5625	-33.5312	7.75	-4.84375	13.375	-7.4375	36.4062	-9.40625	29.625	4.03125	12.4688	0.0174	-7.0625	-15.4062	-9.46875	3.46875	6.5625	-28.0938	32.25	-17.25	-23.4688	-4.78125	-4.40625	-19.0625	17.2188	-14.75	12.7812	-30.875	-24.25	-25.5	18.7188	38.4375	-4.9375	0.01738	4.46875	27.7188	-19.2812	-48.375	-42	22.125	-1.625	8.15625	-3.03125	-4.71875	-4.3125	1.65625		0.01738
0.01742	-10.8125	18.3125	30.0312	26.0625	-29.6562	-12.0625	-22.625	1.03125	4.96875	1.46875	1.40625	7.84375	0.01742	-25.5312	-19.5	-3.21875	-19.0938	-24.375	28.2188	-13.875	-21.5625	-8.4375	-3.78125	-24.3125	-13.5	-30.2812	-43.125	-35.0938	3.28125	44.4375	7.1875	-11.2812	-4.28125	-16.875	0.0174	11.7812	-16.875	13.0625	-14.2812	24.1562	-11.2188	1	-2.96875	-12.7188	-21	20.75	-48.6875		0.0174
0.01744	20.75	1.96875	-11.4688	-18.125	22.2188	15.9688	16.9375	-17.1562	-12.75	-40.3125	-27.625	-14.3438	0.01744	2.96875	18.75	-26.0938	-5.15625	-18	17.375	15.75	30.9062	9.4375	-1.5	-8.21875	10.125	12.3438	-15.9062	-9.65625	30.75	-34.4688	-7.78125	-14.2812	-5.71875	-19	0.01742	-27.6562	-9.8125	-3.25	-6.375	35.5938	20.0938	-5.3125	9.0625	0.125	-24	-15.25	5.9375		0.01742
0.01746	14.875	11.3438	-9.4375	-3.5	-24.8438	15.9062	-1.34375	36.2188	-14.625	13.9688	-12.375	-21.5938	0.01746	-4.375	-21.125	5.59375	13.9062	12.7188	23.9062	23.4375	-12.2812	-13.9688	9.6875	20.0938	-4.9375	-2.15625	2.59375	45.9062	-28.7812	-35.0625	-12.2812	37.875	-0.96875	-7.4375	0.01744	13.0625	9.1875	-33.9688	-4.15625	-35.7812	-12.7812	28.9062	23.1562	-3.0625	-19.5	2.84375	42.125		0.01744
0.01748	-8.8125	31.0312	30.4062	6.8125	-7.25	2.59375	-36.5938	-31.1562	-20.0938	28.5938	18.0938	10.9062	0.01748	1.75	-5.09375	-22.3125	-1.96875	-26.9062	23.375	-0.59375	-10.2812	-34.9062	4.78125	-15.2812	8.4375	18.5625	9.03125	-19.75	18.5312	10.1875	1.59375	0.9375	31.6875	-12.5938	0.01746	2.71875	-3.96875	24.8125	19.2188	1.90625	-11.6875	3.34375	-14.1562	-9.6875	17.9688	-12.3125	-24.1875		0.01746
0.0175	-9.65625	-2.09375	35.5625	-24.0938	51.3438	0.46875	24	-27.7812	3.53125	-44.2812	-7.0625	-15.6562	0.0175	3.21875	15.2812	-5.78125	-21.0312	4.9375	-9.1875	0.5625	37.0938	-48.0938	-7.75	-12.4375	6.125	-19.5625	61.5	-3.3125	27.8125	-5.90625	19.0625	-9.1875	-27.6875	-20.9062	0.01748	-1.78125	-10.2812	6.71875	1.15625	-11.5938	15.8125	-22.125	-31.5312	-9.90625	0.0625	-7.375	-18.5938		0.01748
0.01752	15.5625	-11.7188	-30.25	-11.5312	-13.6875	-7.09375	17.8438	28.6562	-15.375	-16.9688	-14.2188	-7.09375	0.01752	-17.5312	-25.8438	-8.96875	-18.875	28.8438	13.2812	5.3125	-41.375	-11.2188	-10.375	10.25	13.7812	-3.4375	-26.2812	47.8125	-16.7812	-20.25	-10.7188	26.6875	-26.2812	-8.90625	0.0175	-15.0625	-5.75	-28.0625	-0.9375	-31.0625	-11.875	-39.125	17.5	-3.8125	-29.875	9.65625	20.4375		0.0175
0.01754	-20.125	-5.3125	9.3125	-2.3125	-20.875	-1.875	-24.2188	-10.0312	-22.3438	37.9688	8.75	2.21875	0.01754	2.65625	-25.8125	-15.6875	-7.3125	-5.34375	21.8438	-14.5	-4.875	26.0312	-6.9375	-6.9375	-30.0312	-15.0312	-6.3125	-37.7812	-28.9688	24.0312	2.8125	-10.6562	41.9062	-21.7812	0.01752	20.1562	-27.5938	16.5625	-40	9.21875	9.125	-22.25	-8.375	-3.5625	23.0938	0.90625	6.625		0.01752
0.01756	-34	12.9688	33.625	-12.2812	28.0625	14.9062	23.1875	-8.65625	2.90625	-29.8125	-9.59375	-21.25	0.01756	7.5625	36.2188	16.25	1.71875	0.78125	14.1875	-14.9688	20.625	24.625	-11.75	-18.2188	-4	-35.5	8.375	-52.0312	6.90625	2.34375	24.4375	-38.25	-42.9062	3	0.01754	-16.1875	-5.78125	5.25	10.7188	10.8438	-27.6562	-10.875	-13.4062	-26.125	-15	-22.5	-46.9375		0.01754
0.01758	-12.375	-31.9062	-36.7812	-6.40625	-12	0.03125	17.5938	36.3438	-9.8125	-7.53125	-17.5938	-20.5625	0.01758	-26.125	11.9375	-9.25	35.0312	25.5938	-26.9375	1.65625	7.625	25.4375	-17.8438	38.5625	16.2812	5.5	-7.8125	22.5	-18.1875	-14.5	-36.9062	-9.90625	-19.25	-17.375	0.01756	-20.7812	4.03125	-15	6.4375	-2.03125	-8.65625	15.75	2.1875	18.5312	-17.25	-5.65625	-20		0.01756
0.0176	8.3125	-31.7188	-15.0938	13.1875	-30.5312	-14.7188	-18.9375	16.5312	-5.5625	21.9375	27.1875	11.7188	0.0176	0.3125	-26.5	-43.3125	-16.4062	1.59375	11.9062	-30.1875	-34.5312	24.0625	1.65625	-0.15625	-13.6875	1.78125	-7.875	-7.34375	-48.2812	41.2812	-17.5	26.75	1.28125	-8.875	0.01758	-11.0312	23.1562	3.28125	-16.8125	1.5	-33.3438	-20.4688	16.4062	14.2188	6.59375	-3.625	-6.375		0.01758
0.01762	-11.0938	12.4062	53.3125	-14.9062	16.6562	7.5625	-10.6875	-6.65625	16.6562	-23.875	13.2812	-26.6562	0.01762	-3.6875	18.5938	8.875	-20.9688	-22.7812	-14.3125	-21.4062	23.0312	23.875	-21.6562	-19.1875	-21.3438	-3.53125	18.5625	-20.8125	5.375	33.5312	-8.6875	-19.2812	-34.4062	15.125	0.0176	-20.1875	-38.1875	-22	11.75	22.625	6.03125	5.75	-23.9062	-19.3125	-6.625	-22.0625	-5.78125		0.0176
0.01764	-6.71875	-48.5	-2.71875	-7.25	12.3125	-7.5625	1.78125	-10.7188	-0.34375	-8.8125	-11.125	3.78125	0.01764	-4.625	-30.9062	-0.125	16.4062	13.9375	-14.7188	17.0625	-20.1562	36.6562	2.21875	0.6875	15.6875	-23.625	-43.75	21.0625	9.15625	-19	-17.5	6.4375	-27.7188	9.8125	0.01762	14.5312	-1.125	-5.46875	-12.8438	-0.75	22.5312	3.6875	-0.5	12.375	10.3125	-7.71875	-12.4688		0.01762
0.01766	13.5938	-3.96875	-8.71875	-1.1875	-27.0312	-21.0938	-15.7188	-11.625	-0.75	18.9688	22.1562	49.375	0.01766	-17.375	-35.1875	-20.8438	-1.3125	2.5625	12	-23.1875	-27.7812	-30.625	-1.4375	-9.21875	-14.7188	32.7812	-19.375	10.2188	-5.96875	8.875	-4.28125	9.1875	8.1875	34.625	0.01764	15.625	13	13.2812	6.03125	-9.875	-4.09375	9.84375	32.5	20.4688	14.8438	9.625	9.15625		0.01764
0.01768	-7.75	-0.34375	23.9688	-26.8438	-17.5312	3.96875	-13	4.96875	9.96875	-5.84375	-13	-12.7188	0.01768	-12.4062	17.5	8.4375	-24.4062	-25.6875	-15.3125	-38.5312	20.0625	-14.5938	-10.8125	-16.25	-2.875	-20.125	52.1875	-37.4062	8.0625	26.4688	-29.75	-37.0625	-0.6875	22.625	0.01766	-8.90625	-5.03125	-14.5312	18.8125	-13.7188	-6.625	-7.0625	-9.46875	-30.7812	20.75	8.78125	-20.2812		0.01766
0.0177	-26.7812	15.2812	-10.1875	6.875	-15.25	8.21875	-6.78125	3.25	15.9375	-28.9062	2.59375	-8.75	0.0177	15.7188	-14.375	38.6562	-7.65625	-14.1875	-35.6875	27.75	-26.1562	11.0625	-3.625	-17.2812	15.3438	-3.5625	3.71875	45.125	38.5625	1.15625	10.1875	-33.5	-16.6562	17.3125	0.01768	-9.25	29.25	1.8125	9.75	-32.4688	-10.75	12.9688	-17.4062	-12.4062	-46.2188	22.2188	0.59375		0.01768
0.01772	-14.8125	-12.0312	-3.5	14.9375	5.78125	-35.9062	-8.375	18.0312	-27.75	-5.21875	39.2812	21.9062	0.01772	-20.5625	-9	-5.71875	21.7812	1.125	-1.71875	2.5625	-30.5312	5.71875	-14.5938	8.46875	-3.75	27.6875	-25.25	7.53125	-3.59375	-6.8125	-10.1875	7.65625	24.4062	7.90625	0.0177	-19.7812	18.875	-16.75	-44.7812	6	13.3438	-0.28125	-24.2188	9.21875	3.6875	20.9375	14.9688		0.0177
0.01774	-14.125	-16.8438	29.75	-14.4375	28.5938	4.78125	-13.375	-43.7812	-15.9062	-28.0312	28.9688	-25.0938	0.01774	-10.2812	-3.78125	-3.96875	-32.9688	-41.9688	0.0625	-27.4688	-1.5	-28.5	16.4375	2.1875	2.21875	20.4062	-10	-64.6562	20.9375	13.375	-10.4688	-7.0625	-5.4375	2.46875	0.01772	-9	-43.1875	-12.2188	20.3125	7.09375	1.59375	-42.25	-16	-45.375	18.4375	9.71875	-31.5625		0.01772
0.01776	-9.25	25.25	19.1875	-3.78125	-9.21875	26.8125	2.75	4.5625	11.8125	0.84375	9.6875	25.3125	0.01776	-1.0625	8.5	40.125	-5.5625	-11.5312	-37.9375	1.1875	-5.9375	0.59375	-31.625	-13.2188	-5.625	8.3125	46.5938	-2.46875	19.9375	-44.9062	30.4375	-4.9375	-57.0938	5.46875	0.01774	-12.75	-16.5625	7.90625	24	-16.5312	1.6875	12.5312	4.78125	-10.5	-34.5625	-9.8125	-12		0.01774
0.01778	-11.9688	1.25	-21.4375	33.8125	-1.6875	-17.25	-33.3438	-3.65625	21.2812	5.96875	14.4375	-12.6875	0.01778	10.5	-5.28125	-28.9062	12.7188	14.8438	-13.2812	12.9062	-12.0625	24.2188	-5.875	-2.75	11.3438	10.8438	-20.0938	-5.15625	-8.9375	0.46875	-26.2812	-4.75	5.8125	16.1875	0.01776	24.125	-1.375	4.40625	-19.3125	1.125	7.65625	0.90625	1.96875	15.5	-7.625	-7.1875	-11.5312		0.01776
0.0178	16.5938	-13.2188	10.2188	-14.4062	27.9688	15.7812	8.6875	-17.125	8.34375	2.90625	0.96875	-39.625	0.0178	-3.78125	0.3125	-10	-13.625	-3.125	26.3125	-16.4688	-4	-26.9688	-9.53125	-1.75	-16.5625	35.6562	2.59375	-29.2188	26.2188	40.4062	-5.96875	9.1875	38.8438	-0.75	0.01778	3.90625	25.2188	5.1875	-9.28125	1.25	-28.2188	-38	-6.34375	-1.375	-16.0625	-1.5	-17.1562		0.01778
0.01782	-4.25	11	-15.3125	-15.5	-5.25	36.2188	1.625	-3.03125	24.0312	-8	-10.375	7.875	0.01782	-1.96875	-6.65625	16.5	-13.9375	-10.7812	-19.25	24.6875	-9.25	-13.5938	-3.03125	5.75	-17.9062	16.1875	-9.78125	13.8125	5.5	-29.625	39.1875	11.5938	-43.5938	-17.7812	0.0178	-21.8438	-5.71875	-20.25	5.65625	-49.625	-9.53125	16.0938	-14.125	12.9375	-4	-4.875	36.8438		0.0178
0.01784	12.4062	25.0938	-30.4688	13.7188	-11.9688	-2.6875	-16.7812	12.375	19.5312	7.21875	1.5	18.7188	0.01784	19.4375	0.0625	-17.6875	-6.125	-7.25	-17.5312	2.84375	-16.125	-11.25	-16	-22.7188	3.65625	-20.5	-36.5312	19.5938	-29.4688	-1.59375	-4.5	13.3438	0.03125	-3.59375	0.01782	40.0625	-7.84375	2.65625	-13.9062	-10	-12.7812	0.46875	-8.5625	20.3438	-2.46875	1.46875	-20.7812		0.01782
0.01786	-10.375	-27.2188	10.9062	-2.4375	45.9375	-17.375	9.5625	-11.3125	-35.4062	-15.0625	15.0938	-9.71875	0.01786	1.875	7.03125	-35.3438	-4.78125	-7.625	8.59375	-36.3438	41.9688	-1.53125	-7.65625	-18.125	9.3125	16.2188	8.46875	-43.0938	3.5625	14.625	-28.9688	21.4375	12.5938	-18.5938	0.01784	-29.5	-22.1562	22.3438	3.6875	34.125	-0.59375	-14.0312	4.09375	-21.2188	19.3438	2.59375	0.75		0.01784
0.01788	39.3438	2.96875	-30.5625	-12.3438	8.5625	29.8438	6.65625	15.6562	-5.4375	6.28125	-18.8125	-14.4375	0.01788	-4.46875	-16.1562	2.59375	-21.0312	9.28125	-26.0625	14.375	3.59375	-18.9062	-7.5625	23.9062	-0.34375	-13.25	1.15625	-7.125	23.3438	-13.2188	23.5	4.71875	-1.3125	-9.15625	0.01786	-3.71875	1.4375	-2.84375	-8	22	-9.40625	-7.6875	30.4062	7.84375	-22.3438	2.28125	19.0625		0.01786
0.0179	-4.71875	14.5625	-17.9688	7.84375	13.875	-21.8125	-8.34375	29.6562	34.2812	19.5625	-12.4062	26.4062	0.0179	-12.625	-10.5	-26.8125	23.9375	-5.46875	-17.375	17.8438	-21.625	-14.2812	9.90625	5.71875	1.6875	4.4375	-28.4688	31.7188	-7.96875	-7.875	12.25	1.0625	-5.65625	-9.40625	0.01788	13.5	27.5938	-5.59375	-8.84375	26.7188	10.3125	1.96875	1.21875	-5.6875	-25.9062	-3.0625	12.5938		0.01788
0.01792	-46.8125	-22.0625	19.9688	32.4375	0.71875	-23.375	-11.0625	-17.4062	-9.125	-25.5938	10.8438	-24.7812	0.01792	-12.4688	27.4062	-18	-20.375	-41.0938	8.9375	-29.9062	30.2812	-14	18.7188	-29.9062	-6.5	5.125	-17.1875	-36.4375	-15	-9.65625	-27.4062	11.875	26.7812	-0.46875	0.0179	0.4375	-16.375	-7.125	21.5938	14	-13.9375	-34	-38.5	-28.0312	-1.5625	-16.375	-15.6562		0.0179
0.01794	28.9375	-14.7812	-12.4062	-17.6875	26.4375	29	18.9688	-1.5	-8.5625	-14.5	-1.78125	2.96875	0.01794	-6.34375	-13.875	20.5938	3.90625	17.75	12.1875	5.71875	20.8125	-7.875	2.96875	6.5625	-44.9062	5.90625	19.75	19.3438	-8	-15.875	-15.0312	-5.53125	-12.3438	-17.6562	0.01792	-33.1562	-32.875	-30.8125	-4.75	-19.6875	11	15.0625	-0.40625	23.8125	-11.9062	-0.125	-21.7188		0.01792
0.01796	15.0312	2.4375	-11.1562	-15.125	-27.4062	-12.9062	-16.0625	16.9688	43.3438	29.3125	-19.7812	22.8438	0.01796	-4.15625	-27.2188	45.875	20.9688	-4.4375	-23.625	24.25	-27.7812	-15.0312	-0.84375	-1.125	27.2812	-7.125	-0.71875	26.375	-14.9062	-35.6875	-9.25	9.6875	13.0938	-8.75	0.01794	15.0938	24.2812	-30.4375	-40.1875	-1.75	4.8125	7.3125	-5	15.4375	-22.9375	-37.4688	3.75		0.01794
0.01798	-35.0625	6.4375	-6.8125	15.9688	1.9375	-10.4688	-12.6875	14	0.96875	-3.375	-24.875	-32.4688	0.01798	2.90625	30.5625	-3.9375	9.40625	-27.4688	3.4375	-26	0.84375	-4.28125	-25.875	-33.25	4.28125	-0.0625	-27.4375	-32.4688	-22.6562	12.5312	-9.625	43.9062	3.5625	10.0938	0.01796	12.4062	-10	17.75	-16.8125	15.8438	11	-9.0625	-12.1875	-25.0625	1.1875	-13.6875	-22.5625		0.01796
0.018	-2.59375	-3.21875	2.375	-12.875	33.7812	12.9062	-0.03125	-15.0625	-30.1875	-55.4688	-5.40625	-36.3438	0.018	-38.9688	8.40625	8.9375	-7.78125	33.8125	-32.4062	-5.84375	5.5	-12.25	-1.40625	-0.59375	-16.7812	-21.1875	12.1875	5.0625	7.65625	-2.375	-10.75	-26.125	-8.21875	-24.2812	0.01798	-25.0312	-31.0312	-10.75	18.4375	0.1875	-10.3438	24.9688	8.75	-10.5	-12.5938	3.5625	19.375		0.01798
0.01802	0.8125	13.0938	-18.375	-27	-2.5	17.2812	-0.3125	15.3125	14.2188	-8.78125	-14.25	25	0.01802	-3.375	-31.6875	33	22.1875	19.3438	-19.5938	14.5938	-8.59375	-18.25	15.9688	-3.78125	2.46875	-23.6562	-3.59375	2.25	6.03125	-42.1875	12	-23.4688	-14.8438	-3.9375	0.018	-8.75	4.875	-23.7188	-7.4375	-28.1562	-7.90625	23.7812	-20.7188	2.875	-2.90625	12.8438	10.25		0.018
0.01804	-19.3125	-0.96875	28.25	5.21875	-6.28125	-11.0312	8.625	3.15625	-9.46875	13.0938	1.375	-7.40625	0.01804	11.9375	2.09375	-16.7812	19.3438	-24.4688	2.3125	-25.0938	-27.6562	-19.5625	-5.625	-14.7812	-21.0625	-12.0938	-12.875	15.4375	-23.7812	15.3438	-8.34375	0.9375	45.0625	-0.46875	0.01802	-1.125	-5.71875	33.9375	23.125	2.125	2.4375	-0.375	-27.9375	-38.625	13.3125	-29.3438	-8.5		0.01802
0.01806	1.0625	-12.6562	9.0625	-0.875	18.1562	14.2812	21.125	-25	-21.2812	-34.6875	9.25	-51.5625	0.01806	-3.625	5.875	2.6875	0.5	13.8125	10.1875	0	25.2188	5.8125	-15.1875	19.7812	22.1875	-1.625	8.75	-2.25	8.46875	15.9688	-12.9375	0.53125	-21.25	-42.8438	0.01804	-15.5625	-46.25	-11.8125	-3.90625	-14.25	11.5	-20.5312	3.8125	-8.5	0.28125	-11.25	-17.7188		0.01804
0.01808	12.9375	-14.0625	-30.5625	-26.875	-11.4062	3.875	0.0625	21.2812	-19.625	8.40625	-10.3438	25.9375	0.01808	-18.7188	-28.6562	11.0312	29.4062	21.9688	-9.53125	6.46875	-1.65625	-11.625	4.65625	1.96875	-16	-13.5312	18.3125	-7.46875	-20.875	-58.3438	48.375	1.40625	-45.0312	-15.5625	0.01806	33.4062	5.0625	-2.75	-31.3125	-16.7188	-16	-3.5625	19.8125	-0.4375	-10.5938	-1.625	-20.5625		0.01806
0.0181	-28.375	-2.90625	10.1562	-9.25	-27.25	-30.625	-28.5312	-6.40625	11.7188	22.3125	-1.125	18.125	0.0181	2.15625	9.1875	-25.2188	3	-28.7812	-3.28125	-13.625	-22.9375	0.0625	18.4375	-30.2188	-26.1875	-4.4375	0.9375	-7.84375	-35.8125	11.7812	-19.8125	-5.40625	13.7188	1.84375	0.01808	-5.8125	-16.5	41.5625	11.75	-9.03125	-3.21875	-28.8438	-7.21875	-13.7188	-3.46875	-5.15625	13.5625		0.01808
0.01812	-22.7188	17.9062	13.875	7.96875	4.625	12.8125	25	-38.5312	-22.4062	-22.0938	10.7188	-34.7812	0.01812	-0.4375	25.1875	15.7188	-14	-17.5312	6.96875	17.4688	17.6562	25.2188	-37.125	-13.1875	-7.1875	-4.875	-0.78125	-25	-7.1875	14.25	-13.625	-22.25	5.8125	-20.5625	0.0181	-20.75	-35	-26.1562	-10.875	10.875	-2	15.6875	7.9375	2.75	-3.5625	27.5625	1.5625		0.0181
0.01814	-4.40625	-38.9062	-17.9375	-36.4062	-4.0625	-4.34375	39.4375	1.59375	0.15625	-25.375	-12.9062	3.5625	0.01814	-32.2812	-9.78125	17.875	-2.71875	14.625	-4.25	13.625	-17.6562	-10.4062	-16.8438	49	-6.34375	-18.0625	56.0938	28.1562	-32.1875	-41.2812	4.25	-2.78125	-49.8125	-4.78125	0.01812	-7.375	22	-32.0312	-15.375	-23.8438	-9.875	26.25	0.21875	0.21875	-17.5938	-14.9688	-30.25		0.01812
0.01816	-0.90625	-19.5	-21.3438	8.78125	-20.5	-18.4062	-20.4062	27.0938	19.625	41.9062	-0.4375	26.5312	0.01816	4.65625	-17.75	-22.4375	26.0938	-12.7188	6.5625	-5.375	-29.7188	-19.1875	-24.5938	-10.125	-6.3125	-14.1875	-4.84375	-25	-32.75	-16.75	-31.7812	-3.5	-13.5312	21.5938	0.01814	5.09375	25.4375	15.75	-10.2812	-9.78125	-50.7812	-17.1562	-5.125	-29.625	-5.1875	-11.3438	-28.0625		0.01814
0.01818	-18.9688	6.6875	18.7812	14.8125	8.4375	4.46875	-19.8438	-18.125	-18.9375	-15.6875	12.9062	-25.2188	0.01818	10.875	-2.875	-12.5312	-22.5625	-12.0625	-5.21875	-12.625	29.7188	13.5312	-14.5	-14.5938	-47.5	13.3125	9.15625	-27.2812	17.5625	34.875	-19.1875	-24.5938	10.4375	-32.5625	0.01816	-12	-11.9688	-27.4375	21.7188	-21.8125	1.71875	-26.0625	2.0625	-3.8125	13.7188	-13.25	-1.875		0.01816
0.0182	6.8125	1.6875	-1.65625	-10.625	-10.4688	8.46875	4.0625	16.2188	-3.21875	-17.8125	7.46875	12.5938	0.0182	-12.5938	-21.25	7.0625	0.9375	22.0312	-19.5625	31.4688	-11.375	1.46875	3	-14.9688	20.5938	7.4375	40.0938	47	1.0625	-9.6875	3.875	-31.375	-7.15625	-7.5625	0.01818	-13.3438	25.1562	-21.875	-48	-3.125	-8.46875	33.6562	36.0625	6.09375	-5.9375	-9.625	1.71875		0.01818
0.01822	6.21875	-16.4062	1.96875	18.5	-11.2188	-30.4062	-18.25	26.6562	28.5938	24.875	-24.1562	9.5625	0.01822	3.1875	-16.875	-13.6875	-11.0938	-31.5625	10.6875	-11.875	-14.1562	-16.9062	29.2188	-9.1875	-9.03125	-17.4062	-5.09375	-9.71875	-19.8438	-21.6875	-1.375	16.1562	-0.3125	20.7188	0.0182	7.25	10.9688	50.75	-22.4688	3.8125	-22.2188	-1.71875	17.875	-10.8125	9.5	10.9062	-21.6875		0.0182
0.01824	-7.21875	-0.90625	37.2188	-2.875	-14.6562	8.46875	-6.25	-42.75	1.1875	-11.875	-19.5312	-18.9062	0.01824	9.5	-9.75	-18.125	-8.3125	-31.6562	0.75	-4.53125	6.53125	-0.59375	-45.2188	-10.9375	-20.7812	-3.71875	-27.2188	-34.6562	3.96875	13.375	-18.4688	-26	11.2188	-0.40625	0.01822	-22.2188	-24.625	-1.3125	44.3438	37.4062	17.5938	-12.4062	-29.375	18.3438	-10	3.1875	-12.25		0.01822
0.01826	14.625	12.1562	-25.2188	4.875	16.7188	27.6875	-11.4688	-41.5938	-11.3125	-35.4375	-17.375	-16.5312	0.01826	-21.4375	-2.3125	4.46875	-24.8438	1.34375	-41.875	27.1562	-3.09375	-25.0625	-6	-25.625	10.9688	-17.5312	24.9688	6.46875	-12.4062	-54.3125	-18.25	-23.7812	-8.3125	-18.4688	0.01824	-22.0312	-20.25	-67.4062	-18.7188	-36.9375	22.5625	50.4062	-16.4375	37.0312	-3.15625	-21.5312	47.6875		0.01824
0.01828	25.6875	-9.3125	-11.7812	-12.3125	10.8438	-12.875	-25.25	-1.53125	-14.0625	37.875	-15.1875	23.0625	0.01828	-4.75	-22.2188	12.5625	6.75	-7.4375	-25.5625	-3.9375	-10.5	-29.4375	37.7188	14.125	14.0938	0.125	-22.375	5.5625	2.03125	-20.5938	1.0625	23.5625	-14.875	20.9062	0.01826	3.5625	28.9375	27.625	11.0312	-8.15625	-23.1562	-21.5	3.125	-5.0625	0.71875	-10.0938	-22.9062		0.01826
0.0183	-4.625	5.78125	16.625	7.8125	0.90625	13.9062	7.25	-1.59375	12.3125	-26	7.96875	-21.2812	0.0183	19.4688	-7.8125	-13.7812	-17.7812	-10.9062	5.96875	-25.0312	-16.4062	-11.0312	-5.25	3.4375	-11.3438	-20.2188	-32.0625	-28.7188	3.875	13.5625	-8.8125	-26.1875	12.6562	-25.7812	0.01828	11.8125	-2.9375	0.34375	-1.90625	-11.7812	-6.34375	-9	-4.375	-30.125	-10.8438	8.4375	-29.375		0.01828
0.01832	1.78125	33.0312	-11.7812	10.625	-24.9375	29.5625	21.8125	-4.9375	11.1562	-7.21875	-8.15625	0.59375	0.01832	-8.78125	2.125	-32.875	-25.3125	16.125	8.21875	26.625	19.0312	2.8125	-10.8438	-16.4062	0.34375	-4.90625	26.9688	-18.25	-0.25	21.8438	8.8125	-8.875	-15.3438	4.65625	0.0183	-16.4688	12.0625	-24.125	-17.75	-16.7188	10.8438	23	-24.9062	-20.875	-10.4375	-27.7812	4.5		0.0183
0.01834	-9	-10.9062	-6.90625	12.7188	23.125	-14.9375	-18	1.125	-14.0938	22.6562	1.4375	-5.84375	0.01834	11.7188	-10.6875	-19.3125	-4.15625	36.75	-17.125	3.8125	-29.1562	-28.5	14.9062	-10.1562	36.375	1.6875	-8.71875	16.7812	0.3125	-7.53125	0.46875	14.5	8.21875	24.7188	0.01832	33.4688	-17.9375	25.5	-0.96875	9.0625	-8.125	-2.8125	21.8125	0.4375	14.5312	-2.28125	5.34375		0.01832
0.01836	-13.1562	-26.7188	-9	-7.03125	13.9062	-15.2812	1.65625	21.9688	-50.0625	24.5938	-0.6875	-33.7812	0.01836	19.6562	36.6875	-3.78125	-0.53125	7.1875	-9.90625	-10.4375	-3.65625	-7.75	-14.9062	0.90625	-22.9062	6.84375	-41.625	-28.5	5.3125	12.9375	-0.46875	-9.90625	3.40625	-24.0625	0.01834	7.96875	-5.4375	14.7188	9.71875	2.6875	-4.4375	9.8125	1.9375	-30.0938	15.625	21.9375	-10.6562		0.01834
0.01838	17.5938	1.78125	-16.125	-18.125	-7.78125	28.4062	-0.875	13.375	-7.09375	-23.9688	-6.53125	11.25	0.01838	-0.4375	4.71875	13.3125	4.9375	31	3.8125	15.6562	-2.09375	16.5312	-9.90625	16.2188	-18.0312	-0.71875	-17.5625	-20.625	25.4375	27.5	24.6875	-11.5938	-16.3125	-39.7188	0.01836	-36.25	-15.0625	-48.125	-5.1875	-20.4062	17.3438	-15.2188	-7.34375	-9.78125	-18.5312	-10.8125	4.90625		0.01836
0.0184	-13.4688	23.0938	-21.5625	2.21875	-18.8125	-13.4062	-17.9375	26.7188	-7.40625	18.2812	-19.9688	23.625	0.0184	10.4375	-19.6562	-60.875	14.4688	20.3438	-10.3125	-28.5312	-11.9062	-4	-2.9375	25.2188	8.53125	0.8125	-14.7812	24.3438	-39.8125	-31.125	11.8125	17.125	0.5	16.5938	0.01838	2.21875	4.90625	17.5938	-20.25	-14.5	6.5625	-15.5938	10.7188	14.5625	-16.3125	-0.5	4.6875		0.01838
0.01842	-11.9062	-14.8125	6.09375	-15.9375	10.4375	-11.5	9.40625	21.7812	-28.5	-16.5625	24.0625	-21.4062	0.01842	26.9688	12.5	-10.9375	-16.3438	-12.0312	-15.0938	-18	-1.1875	0.03125	-6.625	-11.7188	-50.5312	-7.09375	-22.2812	-8.875	-14.125	-24.625	-14.9375	0.03125	5.5	-13.3438	0.0184	-15.2812	-34.375	5.65625	2.5625	24.2812	-26.5	-18	-10.3125	-5	30.3125	17.9375	-9.25		0.0184
0.01844	17.875	16.0938	-18.25	-24.8125	-17.4062	24.6562	15.4062	19.5938	11.0938	-14.5312	1.75	29.3438	0.01844	-29.625	1.125	0.4375	-3.34375	-3.21875	-9.1875	20.7812	38.1562	-10.1875	-26.1562	-16.875	-11.4062	-18	0.28125	-18.1875	21.375	10.9062	-10.0938	-25.4375	-5.15625	-63.8125	0.01842	8.75	36.125	-10.125	-3.59375	-19.5	12.6562	15.9688	18.5625	24.0312	-34.1562	-2.875	3.84375		0.01842
0.01846	14.9688	1.375	-34.625	0	-18.5938	-21.25	-11.9062	5.875	17.5625	29.5	-32.5	40.0625	0.01846	16.4375	-8.5625	-10.7188	-2.90625	6.625	15.0938	25.2188	-7.8125	-2	16.9062	19.8125	32.0312	15.6562	-14.9375	48.9375	-16.8125	-3.40625	-1.28125	-20.875	-1.8125	28.6562	0.01844	25.3125	-0.125	-20.0625	-20.9375	7.21875	-20.125	-25.4688	-17.25	5.84375	-13.5625	-29.8125	-3.125		0.01844
0.01848	-28.9375	-30.25	18.2188	-34.5	12.6562	-13.0625	-13.5938	5.625	-20.9688	-15.2188	-1.34375	-24.875	0.01848	11.4062	9.625	10.5312	-19.2812	-9.5625	-20.3438	-50.875	-2.875	-10.2188	-5.125	-9.9375	-10.75	0.46875	3.3125	-15.5625	-18.8125	0.5625	-11.8438	7.53125	29.6562	8.40625	0.01846	-5.90625	-41.9375	6.96875	21.3125	22.2188	-10.375	-11.0938	8.125	-9.9375	-4.65625	-7.21875	-15.5938		0.01846
0.0185	16.375	-14.0938	-7.1875	-28.5	-15.125	7.6875	34.5312	18.2188	-17.4062	-4.84375	16.2812	-11.0312	0.0185	-6.625	3.46875	9.375	-3.59375	11.4688	-3.53125	-22.5625	28.9062	-9.1875	-15.2188	-9.875	-27.4062	-26.8125	-0.5	1.625	-9.1875	-29.2188	-18.3438	-4.625	-11.0312	-53.5625	0.01848	-10.0938	-4.5625	-4.40625	2.625	-31.3438	21.5	9.96875	9.9375	11.2188	1.90625	-1.28125	-0.15625		0.01848
0.01852	-0.90625	-6.5	-8.9375	18.9062	-35.8125	-5.5	-23.4375	11.9375	25.5312	25.0312	-31.6562	23.9375	0.01852	-17.6562	-7.0625	-28.5	10.3438	17.4375	1.90625	30.9688	-6.15625	10.25	0.34375	17.9062	18.0625	15.5938	4.75	17.0312	-13.625	8.90625	14.3438	-27.375	-35.2812	13	0.0185	-16.5312	31.9688	-25.5	-4.21875	-16.6875	-27.5938	-20.75	-11.1562	22.125	-35.375	-23.9062	4.0625		0.0185
0.01854	-3.53125	-53.7188	38.3125	12	6.8125	-6.78125	-35.8438	-7.71875	25.5312	-21.5938	-10.9375	-28.5938	0.01854	11.9062	-12.3438	-18.125	-24.5	0.75	-5.96875	-23.6562	-29.25	-9.71875	5.375	-6.25	28.6875	-4.15625	-1.875	-20.375	-17.1875	-31.0312	-16.9375	6.71875	32.0938	3.625	0.01852	17.125	-23.5312	-19.4062	-40.9062	-13.75	-2.75	-25.0312	11.6562	-31.7812	30.6875	1.34375	-6.09375		0.01852
0.01856	5.8125	16.875	7.96875	-35.4062	16.0938	31.875	3.375	-19.4062	-35.2812	-17.7188	13.1562	-14.9375	0.01856	16.4688	-15.9688	19.5	-30.4062	-8.78125	-5.53125	-11.8125	5.21875	-9.8125	-1.40625	-12.9375	9.4375	-11.1562	-1.34375	-20.0312	5.125	-5.90625	-16	-7.28125	-18.4688	-18.6562	0.01854	-17.1875	-19.0938	-5.96875	-1.5	11.7188	24.9062	27.1562	-13.25	-25	35.0938	-3.96875	-29.8438		0.01854
0.01858	10.3438	30.5625	-40.7812	-1.125	0.15625	-9.96875	-5.71875	-0.09375	5.15625	11.2812	3.03125	30.2188	0.01858	-22.7188	9.75	-20.2812	-6.09375	-4.21875	-13.5	9.84375	13.875	0	-4.125	12.25	27.8438	0.15625	16.75	28.2188	9.8125	-10.1562	11.5312	8.90625	-33.25	-34.7188	0.01856	9.3125	15.9688	27.5938	-1.1875	-11.6875	-10.3125	-9.59375	-48.8125	3.34375	-14.2812	4.15625	0.71875		0.01856
0.0186	-6.375	-24.1875	28.7188	14.4688	-10.375	12.8125	-12.6562	-37.125	-8.96875	-1.59375	-3.46875	-32.0938	0.0186	10.5312	-9.125	-26.0938	-6.96875	-33.8438	1.5	-12.4062	-1	-2.125	1.125	2.53125	-8.4375	-0.625	-30.1562	-7	-23.125	-11.0312	-4.96875	-26.875	19.625	24.9688	0.01858	-10.7188	2.0625	19.875	8.09375	11.6562	-28.6875	-34.0312	5.5625	-25.3438	8.21875	-14.5	-1.15625		0.01858
0.01862	-29.375	-1.78125	17.2188	0.875	12.5625	24.4688	7.78125	-25.6875	-40.25	-22.9375	46.5	15.75	0.01862	-15.4062	-20.375	34.1875	-30.875	-5.875	1.71875	-24.7188	-23.625	-15.1875	-18.875	-10.4375	14.5625	-31.4375	18.1875	-43.375	-7.25	3.625	-6.9375	-18.3125	-6.625	-8.15625	0.0186	-34.125	-20.4375	2.59375	28.5938	-40	7.78125	0.90625	28.7188	3.53125	-26.4062	5.25	1.9375		0.0186
0.01864	-12.2812	9.96875	-28.4062	-13.7812	-15.3438	-10.8125	-9.71875	26.4375	18.1562	23.3125	-17.8438	19.1562	0.01864	-16.5625	19.3438	-9.78125	5.65625	29.0312	-17.8125	14.875	-31.4062	0.21875	-18.75	3.65625	5.25	-22.6562	-7.5625	6.65625	-14.4688	20.7812	1.96875	-4.4375	-21.625	-30.6875	0.01862	16.875	2.5	29.8125	15.6875	-16.1875	32.7188	28.0938	-25.9688	5.1875	-5.625	17.375	12.6875		0.01862
0.01866	-30.8125	-6.09375	-0.65625	-24.5625	0.21875	11.3438	-17.0625	-22.875	27.5938	2.875	-24.6875	-8.78125	0.01866	2.21875	-9.90625	-26.5938	-12.0312	-30.5625	30.0938	-7.9375	-7.71875	-10.9375	26.2188	3.84375	17.9062	26.6562	-35	-3.6875	7.75	-11.5	15.5	2.59375	-36.5	24.4688	0.01864	15.4688	10.0312	-21.6562	-15.4688	17.1562	-39.8125	-39.6875	-0.1875	-27.7188	22.3438	-7.0625	2.90625		0.01864
0.01868	19.5625	-27	17.1562	6.96875	16.6875	30.0938	26.0938	-2.5	-26.0938	-26.4062	21.7188	-16.75	0.01868	1.78125	-2.78125	-0.34375	-16.125	-26.125	-13.3125	-49.4688	6.375	-4.15625	-28.875	-28	-33.5312	-18.9688	-2.90625	-31.125	-20.8438	-14.8125	-25.125	-20.8125	-7.25	-7.625	0.01866	-31.8125	12.2188	-4.71875	15.4062	6	-1.90625	-17.875	-1.8125	-17.1562	-18.5938	-10.9062	-2.90625		0.01866
0.0187	4.96875	-6.6875	-49.7812	-20.9062	-13.5312	-16.4375	-4.0625	-5.03125	-16.9062	22.4375	9.53125	42.5938	0.0187	-18.125	13.8125	10.0938	26.375	1.46875	-16	6.75	-8	22.375	-6.6875	-18.8125	4.6875	-9	22.5625	-14.9688	-15.125	21.6875	10.3125	12.375	-28.125	-6.5	0.01868	-19.5312	21.9688	18.4688	-3.90625	-3.09375	28.2188	20.6875	-1.71875	23.6562	-20.625	-3.65625	-23.0938		0.01868
0.01872	9.78125	7.96875	-21.6562	29.5625	-24.7188	-18.0938	-41.0625	0.5	50.3125	13.5312	-32.75	-7.5625	0.01872	9.875	13.7188	-20.75	22.6875	-12.8125	13.7188	1.375	-0.4375	10.6875	2.6875	-17.5	28.875	19.4062	-18.3125	3.84375	8.3125	-9.90625	-8.1875	-18.8438	1.40625	-5.15625	0.0187	-10.4375	14.6875	-1.625	12.4688	39.5625	-28.0312	-47.7812	-5.96875	7.0625	3.0625	5.9375	-10.75		0.0187
0.01874	-5.28125	15.625	17.4688	12.2188	2.71875	26.4062	0.625	-10.4062	-12.625	-17.25	-3.9375	-48.7188	0.01874	-9.59375	-44.25	-3	-38.4062	-35.1875	-10.1875	-20.2188	-10	-27.0312	-4.125	-5.3125	-31.3438	-11.9688	-10.0938	-20.2812	-22.7812	-6.875	1.34375	-13.0312	16.4375	15.4062	0.01872	28.1562	-3.46875	13.2188	-3.90625	-17	-9.875	9.96875	-12.0938	-26.4062	-26.8438	-27.5312	-11.3438		0.01872
0.01876	17.5312	-3.78125	-9.5625	1.34375	8.59375	31.4062	14.625	-8.875	-6.625	-0.625	12.5938	53.7812	0.01876	-22.3125	-0.96875	23.0938	-16.9375	-13.8438	-23.8125	21.9375	-2.09375	-21.8125	-9.1875	-32	-7.40625	-15.4062	-6.78125	-3.21875	17.2188	-9.5	-25.9062	1.65625	-15.1875	1.15625	0.01874	11.0625	2.90625	-12.3438	-22.4688	-32.4062	23.75	22.5625	-9.3125	15.5938	-3.375	22.25	5.78125		0.01874
0.01878	-18.9688	11.25	9.03125	-18.1562	-14.2188	-18.5	-51.4375	31.1562	22.4375	24.5312	-13.3125	-8.125	0.01878	-8.1875	4.59375	-15.625	18.8438	-19.5625	-14.9375	17.5	18.4375	9.125	6.90625	2.65625	26.7188	36.9688	-13	2.34375	-0.0625	-28.1562	-6.125	-18.3438	9.5	6.9375	0.01876	-9.5625	4.28125	-3.65625	-38.3125	-5.6875	-20.9688	-3.15625	-7	-1.96875	11.3125	25.7188	3.3125		0.01876
0.0188	-38.5625	-1	20.375	-2.59375	-11.625	18.2188	7.96875	-30.9688	-19.5312	-32.5312	0.1875	-36.5	0.0188	-18.125	-7.65625	8.1875	-31.5625	-21.7812	7.0625	-27.6875	2.375	-21.2812	13.5938	-5.53125	-7.6875	-13.125	-2.84375	-9.125	11.4688	-11.4375	3.28125	-14.9375	4.78125	7.625	0.01878	-31.4375	11.125	-35.9688	32.4688	24.1875	0.59375	-11.4062	-16	-26.3438	-14.5938	3.6875	0		0.01878
0.01882	34.5625	12.625	-26.125	14.5938	-2.96875	-20.5	35.3438	-19.5938	-15.1562	-39.125	-18.0625	-4.09375	0.01882	-24.125	-20.5	-19.375	-25.7812	-0.03125	-18.5	13.4688	-7.78125	-12.9688	-22.4375	4.5625	-27.7812	-38.25	15.5	-14.9375	-17.7188	-10.3125	-36.0625	22.4688	-17.625	-12.625	0.0188	-4.40625	-25.4375	3.71875	-3.40625	-13.9688	29.3438	10.5625	-18.9375	7.28125	12.6875	-2.09375	12.7188		0.0188
0.01884	13.1562	-3.53125	6.1875	-9.78125	-21.25	-30.0625	-33.875	5.96875	-14.5312	9.125	-21.5625	-18.6562	0.01884	53.9375	-3.84375	-12.0625	19.125	1.34375	-23.5312	4.96875	-12.5312	12.4062	0.84375	19.5938	28.5312	28.875	-27.1875	14.0625	1.21875	-16.8125	10.2188	-3.5625	18.7812	8.125	0.01882	0.25	-5.4375	10.3125	2.40625	8.65625	-13.9375	-38.25	11.125	50.6562	3.28125	1.15625	-8.78125		0.01882
0.01886	-18.7812	-26.5312	15.2812	-13.2188	-25.2188	9.15625	7.21875	0.53125	-14.1562	-20.9688	26.4688	-18.8438	0.01886	2.28125	6.375	-9.8125	3.6875	-0.78125	5.90625	-28.6875	7.375	-25.7812	2.46875	-15.5	-1.5625	14.3438	-36.7188	2.65625	17.9688	-11.8125	28.625	-20.9688	21.9062	7.4375	0.01884	29.625	5.03125	-14.6562	-12.0938	-3.28125	-15.5	-4.21875	1.34375	28.375	-40.9688	4.6875	45		0.01884
0.01888	8.46875	-10.875	-35	21.2188	18.125	20.4062	37.875	-14.4062	9.75	-29.5938	-29.0625	4.3125	0.01888	-13	10.3125	14.7188	-15.4062	19.2812	1.0625	10.3438	-17.7188	-25.0312	4.375	-0.09375	-17.4062	-10.5312	7.90625	-5.84375	-11.5938	3.3125	-22.8125	-0.90625	-12.25	-10.4688	0.01886	-35.2188	23.75	-0.6875	-20.2812	-25.9375	8.46875	19.0938	-21.9375	1.1875	-9.15625	-43.25	2.8125		0.01886
0.0189	7.15625	6.6875	-8.5	-15.1562	21.0938	-31.0312	-11.7812	-36.4688	-7.0625	43.9062	9.9375	1.53125	0.0189	1.15625	20.5312	-18.8125	28.375	-14.6562	-16.6875	4.71875	-16.5938	-13.5	-7.625	2.40625	10.8125	-5.5625	-4	-8.5	-14.9062	11.375	19.5312	-6.28125	-12.0625	-37.1875	0.01888	-10.4688	2.53125	-9.5	10.6562	17.3438	-28.25	-10.7188	-8.28125	-12.1875	24.4688	-13.9062	-7.65625		0.01888
0.01892	-9.71875	-1.6875	0.125	-3.90625	0.15625	15.75	-23.8125	6.09375	-24.625	4.65625	1.15625	-11.625	0.01892	-8.65625	35.4062	-38.4688	-2.90625	5.65625	-1.21875	-26.4062	19.2188	16.0938	-14.9062	-3.90625	-12.625	0.8125	-29.6562	5.5625	13.2812	-6.125	-5.03125	-5.3125	7.8125	-21.8125	0.0189	32.9688	-43.75	-8.625	20.8438	2.1875	5.96875	-12.25	-5.875	-21.875	-32.2188	-19.9375	-8.8125		0.0189
0.01894	-21	-7.34375	-42.2812	-36.2812	3.625	11.8125	-3.625	16.375	-20.125	3.4375	4.75	-5.75	0.01894	-33.625	6.75	-6.5625	-5.125	6.28125	23.4375	-20.2188	17.125	-8.75	-8.65625	14.3438	-54.9375	-8.65625	4.78125	11.7188	11.125	7.1875	-21.1562	22.2188	-19.7812	1.875	0.01892	-12.5	19.6562	-25.75	-13.9688	-20.4375	3.6875	10.6562	19.9688	1.71875	-15.625	-13.1875	11.5		0.01892
0.01896	24.875	9.34375	3.8125	-18.1875	-2.875	-47.7188	2.875	-10.8125	10.0312	20.2812	-29.75	9.46875	0.01896	-22.9375	12.8125	0.9375	-10.8125	-16	1.875	-17.5625	-10.3438	-9.21875	7.9375	16.4062	-9.5625	-21.9062	31.375	48.0625	-38.8438	-7.4375	4.59375	12.7188	-0.5625	-29.4688	0.01894	-11.7188	-20.9375	9.28125	-40.4688	-19.5938	-21	16.1875	-2.4375	4.78125	18.9688	10.7812	9.9375		0.01894
0.01898	-10.2188	-16.4688	39.0312	-19.7812	1.65625	-16.6875	-8.15625	-5.59375	-30.6875	-7.375	-3.90625	-37.7812	0.01898	8.71875	-21.1875	-18.9375	22.7812	-22.0938	7.25	-19.7812	7.9375	22.9062	7.78125	-19.625	1.9375	-21.125	-59.2812	13.7188	-2.65625	15.1875	-4	-24	-7.65625	-14.0938	0.01896	22.2188	-24.0938	-4.5625	25.25	7.5	-22.0312	9.125	8.34375	10.7188	12.3438	-19.25	-28.1562		0.01896
0.019	13.7812	-17.6562	-3.3125	-4.78125	-21.2188	10.5938	15.0938	4.71875	-13.25	-14.3438	-1.25	-4.21875	0.019	-34.875	25.3438	8.9375	-17.9375	21.75	15.9062	-0.8125	8.59375	-13.8438	-42.7812	-6.8125	-28.2188	-5.28125	-3	32.1875	7.125	-41.8438	-15.4375	-10.9062	-17.2188	4.71875	0.01898	15.9062	-7.78125	-23.2812	-12.75	36.1875	21.9062	11.75	-5.40625	20.7188	-12.25	2.0625	-23.7188		0.01898
0.01902	14.875	5.5625	13.2188	-8.84375	-19.625	-59.2188	-16.625	-4.875	38.3438	6.75	10.4062	37.125	0.01902	-1.625	-5.8125	19.3438	0.34375	-15.9375	-13.125	12.0312	-18.2812	-1.59375	4.65625	7.21875	2.71875	8.9375	29.5625	11.0312	-42.375	-3.25	-16.1562	9.71875	25.0625	7.65625	0.019	-2.28125	19.5625	-29.375	-9.875	-30.0938	-22.2812	-10.5938	1.59375	-16	-4.59375	20.1562	-1.96875		0.019
0.01904	-40.5625	-20.875	20.75	-16.875	26.3125	9.53125	-9.78125	1.125	-38.2188	-6.28125	1.78125	-26.8438	0.01904	13.6875	-9.875	11.3125	5.09375	-44.1875	8.3125	-25.875	2.5625	-4.625	13.2188	-17.2188	-6.78125	2.9375	-2.5625	-41.0625	-7.8125	9.46875	-3.78125	-24.25	-3.0625	-3.40625	0.01902	-15.6562	-14.625	28.9062	20.6562	-15.4688	-28.375	-18.4688	-2.5	-31.2188	-23.4062	9.8125	-1.65625		0.01902
0.01906	-18.4062	-1	-8.625	19.7812	-25.1875	10.1875	14.4375	4.65625	2.875	-15.9688	18.9062	-17.75	0.01906	-31.7188	6.59375	-25.8125	-51.5625	30.5938	-19.4688	6.0625	-0.375	-6.9375	-30.5312	-18.2188	-18.875	-23.7188	-14.7812	5.15625	-5.5	-23.2188	-7.5625	-30.75	-38.3438	-5.9375	0.01904	14.25	-20.5	-1	-6.46875	1.90625	54.9375	21.0625	-5.96875	-0.34375	-14.9062	-20.4375	-9		0.01904
0.01908	11.4062	-8.84375	2.78125	12.1562	3	-29.2188	-31.0312	-51.9375	42.4688	3.8125	-16.875	50.25	0.01908	-29.125	-8.15625	2.3125	-4.34375	1.5625	-11.9062	-3.78125	-35.5625	6.03125	18.7188	5.96875	-18.7188	-1.71875	24.8438	19.1875	-17.5312	-26.9688	-4.53125	26.0625	7.65625	-13.9375	0.01906	-17.8125	18.9375	2.78125	-38.9688	-1.90625	-22.0312	-16.125	-14.4062	-8.21875	-8.78125	-8.40625	2.65625		0.01906
0.0191	2.1875	-6.40625	21.8438	3.09375	-9.28125	-16.4688	-4.78125	-7.625	-14.8438	-35.125	-26.2812	-36.8125	0.0191	15.9688	-5.625	20.5312	17.625	-28.3438	9.65625	-16.4062	-16.1562	-13.4375	20.5312	7.78125	7.5625	33.5938	-1	-3.5	-17.5312	32.125	-10.25	4.625	17.875	-4.90625	0.01908	-1.21875	-12.4062	0.21875	14.4062	-11.0625	-6.59375	-33.4688	7.96875	-13.1875	30.6562	-7.75	-26.5938		0.01908
0.01912	-0.46875	25.7188	-21.625	9.90625	-39.5	38.2812	10.8125	7.21875	-7.75	-1.5625	29.0625	-29.8125	0.01912	-26.1562	-15.9062	20.6562	-46.25	-2.53125	-13.3125	13.1562	9.25	11.2188	4.9375	-4.25	-2.25	-8.53125	-13.6562	-11.5938	2.71875	-2.40625	15.25	-29.4375	-22.6562	14.6562	0.0191	17.7188	-24.4688	17.1562	8.1875	-14.5938	-0.5625	40.875	-14.9375	15.5625	-8.65625	5.21875	-36		0.0191
0.01914	9.3125	59.2812	-49.9062	50.625	30.5	-8.9375	-3.375	-26.9375	43.4062	29.5	-9.6875	11.625	0.01914	-13	-1.0625	-16.1562	10.9062	18.625	-20.4062	-22.2812	-34.0312	-3.71875	-19	-7.375	-6.28125	-16.5938	51.8438	10.2812	-12.375	-47.8125	16.9375	27.4062	-27	-14.5625	0.01912	-19.6875	11.6562	-1.6875	-38.4688	-4.5625	-15.625	-34.625	-30.0625	-4	-12.6562	8.28125	2.375		0.01912
0.01916	-9.65625	-6.46875	24.4688	23.5	19.0938	-32.3125	5.34375	-2.1875	-13.3125	-38.7812	-26.9688	6.71875	0.01916	34.3125	-32.125	-16.5938	19.9688	-43.5625	3.15625	-7.75	-18.2188	9.1875	-6.71875	17.8438	2.46875	18.6875	-9.84375	-11.5	-3.75	32.4688	-6.25	22.4375	16.2188	-0.40625	0.01914	-2.875	24.875	-19.125	16.6562	3.25	-18.1562	-35.7812	15.5312	-29.6875	39.6875	-1.3125	12.0938		0.01914
0.01918	0.96875	-0.125	11.6875	6.4375	4.90625	16	12.4062	-4	-35.625	-24.7812	9.46875	-15.8125	0.01918	18.375	5.5625	9.125	-26.2812	-11.4062	3.28125	-6.625	13.75	11.375	-42.125	-12.8125	0.21875	-29.1562	-30.625	-11.625	18.625	-0.96875	2.40625	-28.0938	-20.8438	9.96875	0.01916	-8.125	-16.2812	1.6875	3.75	-10.25	1.09375	31.9688	5.375	-3	6.90625	-17.375	-22.5		0.01916
0.0192	6.21875	66.3125	-23.2188	6.0625	7.75	-7.625	-4.125	-4.5625	48.125	31.6562	-35.25	17.2188	0.0192	-8.21875	25.7812	-20.2812	-7.875	32.6562	-10.7812	18.5625	-10.125	-42.9062	-17.4375	2.71875	12.7188	-16.25	13.8125	-14.1562	-18.6875	-64.0938	-19.2188	0.28125	-38.8438	9.59375	0.01918	-10.4688	-29.625	2.34375	-2.59375	-17.5938	2.9375	12	-29.625	5.1875	4.40625	-1.25	13.7188		0.01918
0.01922	-9.65625	-1.59375	-34.8125	-29.5625	-4.84375	5.5	-26.6562	-6.125	-6.28125	28.8125	4.15625	-10.375	0.01922	8.59375	-31.5312	-17.625	11.4688	-25.5	17.0625	-24.8125	-13.5625	6.875	23.9375	15.1562	-5.90625	5.21875	-23.4062	-18.0938	-14.5	-1.6875	-13.6875	12.8438	33.4688	-15.1875	0.0192	-6.34375	2.9375	4.125	-5.46875	12.375	-25.4062	-43.0625	-2.375	-26.2188	7.65625	20.2812	-16.8125		0.0192
0.01924	-18.0625	-39.9688	16.625	-17.6562	-0.3125	65.8438	11.0938	-1.28125	-43.7188	-19.6875	23.875	-11.75	0.01924	-6.90625	0.40625	15.6562	1.25	-13.2188	1.84375	-26.625	13.0312	-2.5	-16.4062	-11.75	-22.9062	-33.4375	-26.2812	-32.6562	12.1875	30.4375	10.0625	-63.0312	-41.0938	-2.78125	0.01922	-17.25	-12.7812	2.40625	1.59375	-5.71875	12.5625	0.21875	21.9688	7.40625	-38.0312	-8.3125	-16		0.01922
0.01926	-8.71875	30.6875	-6.59375	23.7188	1.46875	11	-20.3438	13.5938	2.125	11.3125	-11.6875	9.0625	0.01926	6.09375	8.15625	-7.8125	-17.5625	11.625	-36.0938	15.2188	2.25	0.5625	8.25	-19.5938	-30.5625	-31.1875	-11.0625	5.90625	1.40625	-2.5625	-2.15625	-27.4688	-31.375	7.90625	0.01924	10.9062	0.46875	1.5625	-19.3125	-22.75	5.8125	37.6875	-35.0312	-6.84375	-10.125	14.9062	-13.875		0.01924
0.01928	10.5625	-2	-15.0312	24.6875	-47.1875	-25	-49.0625	-0.65625	-4.90625	-4.59375	-36.8125	-10.5	0.01928	-7.1875	-32.7812	-7.75	32.4375	-41.1562	-9.09375	6.53125	-31.2188	-24.0312	6.4375	29.5625	6.46875	19.2188	-9.65625	-1.53125	-26.9375	3.125	-3.40625	30.8125	45.6562	-6.125	0.01926	-16.625	20.5312	-1.4375	-13.1562	32.9375	-1.875	-25.9375	10.0938	-15.8125	9.6875	-8.4375	12.75		0.01926
0.0193	25.5938	-28.5	-29.7812	-21.4688	-6.5	-23.125	26.1562	8.65625	-6.75	-42.9062	17.4062	-23.3125	0.0193	-11.8125	-28.4062	-14.75	-7.875	-23.3125	-21	5.4375	14.6562	-7.1875	-21.1562	-14.5938	-5.25	-4.5	-35.2812	-12.6562	12.8125	11.9375	-20.7188	-11.9062	41.3438	-27.5312	0.01928	6.75	-5.21875	-9.53125	-9.0625	-6.6875	10.2188	-0.4375	7.625	-17.375	-11.125	-26.0312	30.6562		0.01928
0.01932	23.7188	-9.96875	-3	-5.25	-2.65625	-21	0.5	-18.7812	23.7188	23	-10.7812	9.78125	0.01932	-3.375	23.7812	-34.4375	-11.7812	7.4375	-6.34375	-3.4375	29.5625	-12.6875	-3.65625	-21.0625	-22.9688	-18.125	13	12.375	11.9688	-10.625	-20.5	-12.25	8.28125	26.0312	0.0193	-14.5	-1.4375	-9.96875	-2.65625	-21.3438	22.0938	-16.5	-15.2188	14.3438	-3.8125	-13.5938	-34.0938		0.0193
0.01934	-11.625	27	-1.15625	20.8438	-14.625	-10.3125	-10.125	-11.9688	-16.1562	13.7812	-26.4688	-11.6562	0.01934	18.1562	-24.0625	4.1875	-9.375	10.9062	13.4062	-18.8438	-2.125	-12.7188	20.1562	18.1875	24.6562	32.625	17.8125	4	-9.4375	1.375	-28.4375	14.1875	41.6562	19.6562	0.01932	-5.25	-6.5625	-17.3438	5.03125	10.2188	3.5	-6.84375	9.5625	-5.6875	-15.1562	16.4688	-9		0.01932
0.01936	-32.7812	-25.125	-2.96875	-17.1875	0.4375	20.9375	15.4062	-17.5938	-9.6875	-53.6875	0.21875	-9.25	0.01936	5.34375	-8.59375	-5.65625	-17.7812	-15.3125	2.1875	-14.4375	-7.53125	-9	20.2812	-32.3438	-2.53125	26.6875	2.625	-4.34375	-9.8125	-16	18.875	6.75	51.875	-33.4688	0.01934	3.71875	-13.2812	11.5	2.9375	-10.0625	-8.9375	19.2812	30.2188	-11.1562	-6.4375	1.71875	13.7188		0.01934
0.01938	14.8125	-10.1875	4.9375	-8.90625	4.125	-9	21.3438	-14.5938	31.4375	-15.8125	-14.3438	-20.4688	0.01938	-17.3125	-19.4688	-27.4375	-11.3125	12.7188	-16.2188	27	-10	-3.875	-22.1875	-16.0625	-33.2812	-45.9062	15	-9.59375	19.75	-22.25	51.625	3.5625	-17.4688	-0.1875	0.01936	-9	-3.59375	9.9375	-0.09375	-10.2812	6.84375	-9.5	-28.3125	-33.25	-0.84375	-8.46875	-24.5312		0.01936
0.0194	2.8125	26.5312	0.90625	-11.1562	1.4375	-23.3438	-24.1562	-5.71875	-9.4375	25.3125	-22.8125	-14.5	0.0194	11.875	4.84375	-2.71875	1.90625	6.09375	-24.9062	41.1875	-12.2812	-2.84375	0.46875	41.8125	28.8438	-9.84375	-25.3438	1.96875	-14.6875	-27.375	-4.34375	37.0938	0.0625	11.25	0.01938	-14.0312	-20	-29.1562	-5.59375	12.5938	-13.4062	-18.0312	-15.125	-10.0938	2.875	-0.5625	16.3438		0.01938
0.01942	-33.3438	-25.7188	7.125	2.78125	-5.9375	26.1562	-25.2188	-10.3125	-27.7812	-8	18.9062	-24.6562	0.01942	-13.7812	-39.1562	15.9375	-16.7812	-10.5	-6.625	-26.2812	0.15625	-9.59375	-5.09375	1.78125	-1.28125	29.3438	-12.9375	-30.0312	8.96875	-3.8125	41.875	4.65625	20.1562	-48.3438	0.0194	17.7188	-13.9375	6.53125	21.1875	-1.9375	20.5	-13.6562	26.6562	26.75	13.7188	5.46875	-29.5938		0.0194
0.01944	43.3125	-19.2812	5.4375	-33.6562	-10.2188	-2.84375	39.9688	-8.34375	5.6875	-13.7188	16.5625	18.9375	0.01944	-20.4688	4.3125	-19.2188	18.7812	1.375	41.0625	-0.625	8.34375	-13	-18.3438	-25.75	-26.4375	2.03125	-15.625	1.28125	22.125	-5.6875	30.3125	-71.2188	-30.9375	-41.0625	0.01942	-0.25	-10.9688	7.21875	-9.5	-24.9375	16.8438	-1.8125	-25.25	8.75	-27.6875	-2.875	20.8438		0.01942
0.01946	-30.9688	3.53125	-23.0312	-10	-10.3125	-35	-28.5	24.875	8.5625	37.125	-24.5625	2.375	0.01946	-3.8125	41.4375	-12.2188	34.1875	6.59375	-18.8125	-6.96875	-9.90625	-3.5	-8.3125	12.3125	15.125	-7.34375	-6.09375	10.375	-31.2188	-17.2188	-20.7812	-19.4062	-20.3125	0.34375	0.01944	-27.4688	-6.4375	-24	-36.5	29.3438	-35.9062	-14.0938	-26.3438	-6.25	17.5312	-9.5625	31		0.01944
0.01948	-38.5625	-31.4062	15.2188	-14.9062	2.21875	8.3125	11.0625	0.21875	-46.6562	2.75	13.9375	-23.1875	0.01948	-0.9375	-26.5625	15.75	-29.1875	4.21875	5.03125	-28.8125	-23.9062	26.5625	4.25	-6.78125	3.1875	15.3438	-13.5625	-11.1875	-19.8125	24.7812	-15.3125	16.3438	36.0938	-27.1562	0.01946	5.84375	10.1562	-4.875	7.40625	-4.3125	-3.625	-9.84375	27.1562	-5.09375	9.09375	14.25	-8		0.01946
0.0195	17.2188	-40.7812	23.9688	-28.7812	14.9062	15.2812	69.8125	6.15625	15.4062	-31.9375	19.9688	23.2188	0.0195	-2.875	-25	-21.9375	-0.75	-6.6875	8.5625	-5.4375	21.875	-17.9375	-40.0938	-13.7812	-30.4062	-28.0312	22.625	-8.5	20.6562	-21.4062	18.5625	-30.625	-30.7812	-29.8438	0.01948	9.375	-0.125	12.2812	3.71875	-22.9062	-19.0625	17.25	5.21875	-9	-11.3125	-25.4062	-10.4375		0.01948
0.01952	-14.625	-2.65625	-35.4688	-1.21875	-3.40625	-38.1562	-2.53125	-18.0625	24.75	32.6562	3	10.5312	0.01952	13.4688	37.6875	-28.3438	-10.5938	-18.9375	-17.5312	27.2188	-20.75	9.125	-18.25	23.8438	-14.5625	4.15625	-3.625	1.53125	-31.6562	11.6562	5.59375	-1.78125	-20.2188	17.9062	0.0195	-5.6875	-6.28125	-29.875	5.96875	9.6875	-5.3125	1.59375	2.71875	-1.46875	-0.25	-29.2188	12.75		0.0195
0.01954	-18.5938	6.6875	9.90625	-19.4375	-22.5938	0.46875	-22.1562	20.0312	-25.375	25.0312	21.9688	-13.4375	0.01954	26.625	8.875	27.5938	-55.1875	-17.9062	-3.84375	-38.0625	12.5	-12.0938	1.9375	9.15625	27.5	14.2188	10.2812	-12.9688	-44.9688	7.21875	-26.125	19.9375	11.5	6.15625	0.01952	-26	-6.84375	-7.6875	-38.7188	0.09375	-8.59375	-17.9062	8.0625	-2.59375	-7.375	-5.25	14.2188		0.01952
0.01956	11.8438	-14.0312	-22.1875	-11.4062	-18.2812	-10.9375	26.4688	-12.4062	-20.1875	9.25	-8.65625	-2.25	0.01956	-31.5625	-5.625	24.9688	1.5	-17.25	-22.4375	-9.375	-1.25	-11.875	2.0625	-24.0625	-40.4062	-46.8125	-8.9375	12.875	0.6875	-24.5	0.09375	-17.9688	0.15625	-5.625	0.01954	-6.28125	-19.9062	0.59375	-14.8125	-10.1562	-14.875	-0.15625	-13.0625	-9.90625	-15.7188	-1.21875	-20.8125		0.01954
0.01958	20.4375	-11.2188	12.5938	36.8438	-1.5	-9.6875	8.8125	-13.9062	47.625	18.7188	-16.25	1.03125	0.01958	-17.7188	-23.5	-28.8438	43.8125	3.75	-20.125	15.8125	-25.9062	13.3125	-12.4375	-38.5625	-12.2188	-10.8125	-10.0625	3.15625	3.0625	-13.8438	-2.875	-5.8125	-35.6562	-3	0.01956	-8.5	28.375	15.9688	-13.1875	-16.9375	-9.25	26.0625	-10	-10	30.375	-4.75	0.40625		0.01956
0.0196	-17.9062	-23.1875	22.7188	-24.2812	0.84375	-4.71875	-48.625	14.9375	-15.8438	10.75	22.25	-25.8125	0.0196	-2.78125	-25.1562	15.0625	1.375	4.625	12.7812	-9.09375	-5.53125	2.3125	17.4688	5.6875	28.2188	25.9688	-14.7812	-28.0938	-10.375	2.65625	-28.5	24.4062	7.3125	-3.6875	0.01958	-10.75	13.0938	22.8438	28.2812	0.71875	7.46875	-10.875	3.125	-7.09375	-17	15.0625	17.4688		0.01958
0.01962	3.59375	16.75	-15.625	13.5625	-45.1562	0.375	15.4688	-15.1562	5.53125	7.6875	-15.4062	11.2188	0.01962	-54.5312	-6.90625	40.875	-50.7188	6.65625	-6.59375	-10.2812	11.3125	-14.5312	-9.84375	-17.25	-9.6875	-7.53125	4.71875	-13.125	16.5625	-25.875	-28.9062	-5.875	6.5625	8.40625	0.0196	8.34375	-8.90625	4.65625	-2.71875	7.40625	1.3125	-32.625	-19.5	1.8125	-12.5312	-18.9688	6.875		0.0196
0.01964	35.9062	11.9375	-28.375	16.875	24.1562	5.375	-18.0938	-32.9688	28.75	31.5938	-20.6562	1.34375	0.01964	-6.34375	3.96875	-38.7188	-2	-8	-11.625	23.5938	-19.9688	5.03125	-24.1562	16.4375	-18.7812	-20.8125	8.6875	10.3438	-7.4375	-21.7812	-0.375	1.75	-36.5938	9.09375	0.01962	-0.75	-15.4062	-8.4375	-13.2812	-5.875	-26.9688	-9.75	-13.25	-0.90625	14	5.1875	-13.4375		0.01962
0.01966	1.9375	-35.1875	7.15625	-37.6875	16.625	-7.25	-14.5312	2.03125	7.96875	-30.4062	-10.6562	-27.8438	0.01966	26.9688	-47.5938	-5.46875	-1.78125	-29.25	7.6875	-8.75	-10.5625	6.59375	17.4062	40.7812	32.2188	36.125	-1.90625	-35.7812	-19.0938	28.75	-0.3125	-7.375	-2.0625	22.8438	0.01964	-8.4375	-4.375	-21	-5.96875	-2.0625	-23.0312	-14	6.75	-10.7812	-16	44.75	10		0.01964
0.01968	-16.7188	40.9062	-9	1.53125	-20.1562	8.625	6.46875	14.4062	-41.5	-12.625	13.4688	11.7188	0.01968	-7.09375	-1.75	20.375	-22.75	19.1562	-1.90625	-37	-18.3125	-7.96875	-2.9375	13.0938	6.78125	-17.75	-4.46875	-16.2188	23.8125	-15.1562	-1.4375	-0.78125	20.0625	-14.0625	0.01966	4.34375	-0.4375	4.25	-11.7188	-10.75	23.8438	11.1875	3.71875	10.25	26.3125	-16.3438	-23.9688		0.01966
0.0197	25.9688	35.5312	-28.7812	23.0938	-15.3125	21.6875	-2.75	-15.0938	-4.1875	-18.7812	-7.5625	-3.71875	0.0197	19.0625	30.0938	-21.3125	-18.5312	-0.25	-16.9062	12.9062	-19.2188	-33	-18.1875	-0.25	-25.25	-29.25	-11.5	12.625	2.8125	-31.375	11.1875	-4.875	-51.375	-12.7812	0.01968	-17.4688	-1.6875	-2.78125	32.625	4.53125	-20.7188	-13.5	-12.1875	11.9062	-0.78125	4.75	0.53125		0.01968
0.01972	-22.5	-37.3438	15.5938	-26.875	17.5	-17.9375	19.5625	8.15625	4.125	-2.0625	14.0625	-10.375	0.01972	24.3125	-7.8125	-7.90625	22.125	-25.125	8.65625	3.875	-6.3125	10.1875	2.46875	-13.3438	33.2188	2.65625	-10.0312	-21.7812	-8.34375	20.3125	-0.375	-5.65625	4.46875	28.8438	0.0197	0.03125	6.15625	-7.0625	18.6875	-3.15625	-8.71875	-5.40625	-0.25	-25.4688	-40.625	6.3125	18.6875		0.0197
0.01974	-48.9688	-2.59375	8.71875	-17.0312	-7.625	11.8125	10.9062	5.625	-41.4688	-5.25	-0.96875	-12.3125	0.01974	-11.7188	-8.4375	7.34375	9.875	-6.8125	11.125	-34	39.125	14.5312	-6.3125	-13.0938	-17.6875	-15.8438	18.75	-36.5625	5.3125	22.1562	-31.2812	5.375	19.0312	5.9375	0.01972	4.6875	5.53125	-2.78125	-14.375	-0.59375	14.2188	-7.71875	-21.1562	0.6875	8.34375	-16	-20		0.01972
0.01976	36.6562	5.375	-43.875	15.25	-10.125	-4.15625	-5.625	-32.9375	-19.875	39.9688	-56.4688	28.4062	0.01976	-12.375	24.625	-21.5938	7.96875	13.5625	-24.0938	8.375	15.5312	-8.0625	8.84375	19.125	-19.0625	-10.625	-19.9688	14.4062	12.0625	-44.2188	0.5625	-12.625	-44.7812	-22.2188	0.01974	-28.5	-44.0312	-5	-15.9375	-10.875	-11.9688	10.2812	-21.625	-3.0625	13.6562	-14.0312	6.8125		0.01974
0.01978	-12.0625	3	-17.375	-27.9062	-4.75	5.6875	0.96875	-9.28125	12.0625	4.21875	24.0625	-6.78125	0.01978	26.2812	-30.625	-19.1875	2.21875	-25.4688	-6.8125	22.5625	-4.96875	-17	-7.59375	4.78125	-3.40625	-0.1875	-20.6562	14.2812	-24.8438	-13.7812	-18.6562	-7.5	-5.90625	-17.5312	0.01976	30.3125	7.84375	4.90625	-22.75	-13.1875	-13.5	2.8125	13.2188	-13.4688	-29.1875	24.75	0		0.01976
0.0198	-5.40625	-14.2812	-24.1875	-35.625	-20.1562	-3.34375	1.46875	33.0625	6.28125	-18.5625	28.2812	-28.5625	0.0198	-24.8438	-0.8125	7.03125	-15.0938	-4.8125	23.4062	4.65625	57.375	20.3438	9.375	-16.2188	0.03125	9.15625	-30.875	-38.2812	-9.90625	26.8438	-16.125	-5.3125	9.5	28.6562	0.01978	-5	-3.75	1.90625	34.0938	24.7188	20.6562	-17.1562	0.625	11.125	-27.5938	-34.375	-15.7188		0.01978
0.01982	26.4688	3.96875	2.15625	4.59375	16.5	-20.0625	-22.2188	-20.3125	-1.96875	36.75	-29	17.75	0.01982	-23.0938	25.0625	-19.1875	-19.0312	22.0625	-24.375	10	37.9062	-32.4375	-15.125	-5	-25.3125	-18.8438	20.5	52.4688	17.6875	-41.3125	-6.4375	-21.125	-2.09375	-13.4688	0.0198	-46.2188	6.875	-15.9062	-21.75	3.5	10.25	14.0938	-6.53125	46.625	-2.25	-7.21875	4.28125		0.0198
0.01984	-31	-37.875	6.40625	-0.4375	-5.96875	0.09375	-21.5312	11.1875	-17.9062	-42.4688	-7.46875	0.46875	0.01984	15	-27.7812	6.84375	5.21875	-32.9688	-11.4062	-7.28125	-25.5938	-1	8.15625	38.0625	-17.3125	8.65625	5.375	33.5625	-8.0625	12.4688	-8.375	-14.375	-8.625	7.25	0.01982	8.5625	-17.8125	-51.3438	-13.6562	-20.5625	-4.0625	-11.1562	13.125	12.9688	3.25	36.2188	8.65625		0.01982
0.01986	-8.15625	-30.7188	19.8125	-1.875	-41.1562	-6.3125	18.8438	36.5312	3.4375	-25	-1.9375	-14.125	0.01986	-39.875	1.09375	1.28125	11.3125	-12.0625	13.0938	-14.1875	29.5312	8.9375	-9.78125	-25.9062	34.2812	34.1562	-21.4375	-8.9375	17.3125	19.25	-18.4375	18.9062	-2.25	0.09375	0.01984	20.4375	-6.5625	17.8438	-5.15625	11.3125	9.4375	-0.625	-20.7812	-30.4688	-25.125	-54.0312	-14.6875		0.01984
0.01988	-7.1875	7.15625	-20.4688	-10.4688	15.6562	-15.625	-50.5	-34.8125	8.875	-21.3125	-30.4062	13.9375	0.01988	-30.9375	13.375	0.21875	-19.75	29.7188	-10.1562	3.34375	18.3438	-4.78125	-24.4062	-33.4688	-20.375	-19.5625	-6.5	-7.40625	1.96875	-17.4375	-22.4062	15.4375	1.8125	-33.7812	0.01986	-30.25	3.34375	5.625	-6.375	-12.8125	-25.6875	-13.625	-22.6562	-4.0625	-1.59375	-25.6562	-2.71875		0.01986
0.0199	15.7188	15.5625	-8.5	-28.9688	18.9688	-6.46875	-43.8125	-28.6562	-3.03125	-1.84375	-11.9062	-4.59375	0.0199	41.375	-22.4688	-7.09375	-2.1875	-12.5	-17.4062	5.8125	-26.0938	2.25	14.0938	-6.6875	25.9375	-8.78125	6.0625	4.75	-19.6875	-11.2188	15.8125	-14.5625	0.65625	3.03125	0.01988	8.5625	-18.1562	-31.7812	20.9062	-32	5.125	-8.125	18	18.7188	19.6562	28.5625	3.59375		0.01988
0.01992	-37.375	-33.7812	34.4062	0.84375	-3.03125	13.5625	20.4688	4.96875	-35.625	3.15625	22.4688	-13.4688	0.01992	-10.0312	8.5625	-15.3125	-6.875	-8.6875	-7.0625	-29.75	-6.5	12.1562	11.4688	-21.3438	2.46875	14.6875	-8.375	-17	4.6875	14.8438	-3.34375	-10.6562	14.0625	-2.59375	0.0199	13.7812	15	13.0938	6.40625	14.7188	13.8438	27.5625	12.1875	2.15625	-14.0312	2.4375	-14.9375		0.0199
0.01994	-10.7812	5.71875	6.25	6.125	-32.9375	-24.4062	21.375	-1.6875	0.90625	-7.5	-4.5	-3	0.01994	-34.9062	3.53125	-10.375	-13.9375	22.9062	9.59375	-3.875	21.6875	-30.375	-8.96875	-12.0625	-34	-17.5625	18.0938	-30.2188	35.9375	-12.9062	-11.4062	1.84375	7.96875	-22.4375	0.01992	-46.5625	-25.4062	-29.8438	-5.46875	24.3125	-1	12.2188	-18.6562	-24.5312	-27.3125	-7.09375	22.9688		0.01992
0.01996	1.21875	-7.125	-36.5938	17.5938	2.625	-22.8438	-17.7812	-38.9375	15.875	-8.5625	-2.4375	4.40625	0.01996	29.5	-0.59375	13.4375	-1.125	2.28125	-23.8438	4.8125	-28.1875	-6.78125	20.2188	-15.9375	-7.1875	-17.5938	12.4062	-15.5625	-21.3125	-37.0625	19.8438	12.25	-28.7812	-18.125	0.01994	0.78125	-25	-11.2188	12.4688	-10.5	-33.5312	-1.09375	22.875	-23.9062	2.8125	4.15625	23.2188		0.01994
0.01998	-36.5625	-23.125	1.46875	-14	23.4062	40.6875	-0.59375	1.4375	-0.5	-7.71875	40.8438	-8.3125	0.01998	6.5625	4.96875	10.75	12.1562	1.9375	2.65625	-19.625	-0.65625	14.4688	15.8438	-1.90625	-8.125	-1.65625	-3.25	-5.5625	-39.5938	22.1562	11.2188	-6.5625	-9.28125	-7.46875	0.01996	35.0938	1.84375	-3.3125	5.25	-15.7188	-2.34375	-21.5312	-14.4062	-15.9062	-0.25	-2.3125	-32		0.01996
0.02	-4.4375	10.5938	28.3438	15.3125	-1	-33.5312	22.4062	-1.59375	-7.25	15.6875	17.5938	14.5625	0.02	-28.0625	0.84375	-29.5312	0.3125	18.3125	4.84375	-8.6875	3.5625	-5.59375	26.5938	27.625	-21.25	-3.5	-7.15625	19.8125	-8	-7.25	-28.6562	14	-0.0625	16.4688	0.01998	-10.2188	-32.0625	-0.09375	-20.25	-10.375	-8.0625	-2.125	-30.2812	2.21875	-9.34375	-29.2812	-38.7188		0.01998
0.02002	22.9375	21.8125	-18.5	-4	-18.4688	-0.59375	-8.4375	-6	15.0625	-14.2812	-22.7188	-1.28125	0.02002	7.75	-33.5625	-13.875	-25.5938	-2.84375	-20.4688	-13	-36.4062	7.09375	24.4688	13.0625	-2.25	-40.25	9.96875	-13.5	-31.5	-20.2812	2.75	-9.59375	-15.875	-26.875	0.02	-25.875	19.8125	-36.7812	-20.4062	-32.5	-35.8438	14.7812	14.3438	10.1562	37.75	21.875	19.875		0.02
0.02004	-3.96875	-22.1562	-1.40625	-18.7188	-30.125	20.0625	-27.7812	-6.96875	-17.1875	3.9375	1.6875	-36.625	0.02004	24	-8	14.1875	14.8125	-29.4375	4.9375	-28.0312	-19.3125	3	-11.5312	1	-0.875	-3.125	7.5625	-17.9688	-43.9375	33.0938	-5.53125	-9.21875	-34.5938	-5.28125	0.02002	28.7812	26.5625	16.1562	-5.53125	21.3125	19.5625	-12.4062	-8.5625	1.21875	31.6875	-7.59375	-0.78125		0.02002
0.02006	31.8125	-26.6875	-4.53125	2.3125	14.4375	8.78125	4.59375	-19.75	9.03125	22.6875	-9.5625	-3.5625	0.02006	-47.8438	30.6875	-28.8438	9.65625	8.96875	11.0625	1.875	-0.5	-15.9688	-20.5	-23.375	-16	18.1875	-13.7188	12.6562	36.2812	6.375	-30.3125	-3.4375	-7.9375	8.6875	0.02004	-12.5	5.875	25.75	24.0625	39.9375	9.75	-17.9688	-28.5	15.6562	-22.0312	-47.5625	-31.1562		0.02004
0.02008	30.4375	16.0938	-27.4688	-3.46875	9.0625	-17.9062	-6.46875	-22.7188	24.875	-23.6562	-13.7188	-6.375	0.02008	11.75	-49.9688	2.90625	-7	-19.75	-13.9062	-18.5938	2.75	-15.4062	14.0312	3.53125	-17.3125	-34.7188	6	4.84375	17	-47.8438	28.8125	-11.125	-3.03125	-19.2812	0.02006	-15.9688	-5.1875	-31.6562	2.5625	-13.375	-19.8125	23.0625	10.4375	-19.875	12.75	20.875	-3.125		0.02006
0.0201	9.78125	-17.25	-22.25	7.1875	-12.375	-16.5	-27.9688	24.6875	-39.75	-8.375	4.78125	-2.6875	0.0201	8.65625	-25.7188	20.6875	-10.25	-34.1562	-10.625	-45.4688	-12.3438	12.4688	-13.0938	-18.9688	11.5625	8.21875	10.4375	-25.8438	-56.0625	-8.5	-10.5938	19.1875	-14.9688	-0.46875	0.02008	-15.2812	1.0625	21.9688	-17.875	-23.375	-9.78125	1.0625	17.7188	-4.3125	-2.4375	-15.0625	-36.4688		0.02008
0.02012	-1.5	12.7812	-22.7188	10.8125	-0.1875	11.5938	21.5312	-25.5625	-15.125	-14.7188	-7.375	15.2812	0.02012	-11.5	-1.0625	-23.2188	-15.9688	-4.59375	-8.4375	38.75	-23.125	28.6875	-7.8125	-18.8125	13.3125	1.375	0.28125	-46.9688	-29.8125	20.4688	-45.2188	-28.5	-19.125	36.7188	0.0201	-25.875	-25.9375	50.25	-3.46875	3.0625	7.21875	15.5312	-23.5625	10.3125	-13	-2.875	9.59375		0.0201
0.02014	36.5938	27.9375	27.3125	-2.96875	12.9688	-29.0312	-13.0938	-18.5938	48.5938	-6.28125	-50.9062	12.9688	0.02014	-10.625	-23.75	-5.0625	8.28125	-1.4375	-5.78125	0.84375	-25.5312	-28.3125	-1.03125	-4.84375	-21.625	-1.875	-4.34375	26.3125	28.75	-59.4062	-3.40625	-31.7188	23.75	7.75	0.02012	-27.2188	-9.3125	-34.1875	-24.9062	2.8125	6.46875	-30.5938	-18.375	30.2812	15.3125	9.1875	14.625		0.02012
0.02016	2.21875	-23.9688	0.125	-28.0625	-27.9688	-2.1875	-11.2188	20.3438	-5.75	-3.28125	-10.2188	12.0312	0.02016	-0.4375	2.8125	22.8125	-16.5	-19.9375	-18.375	-14.5625	-13.375	-13.5312	6.4375	-39.3125	23.2188	-16	28.8125	-16.5625	-11.9062	-6.25	-1.6875	22.875	-0.75	6.25	0.02014	11.6562	23.7812	-14.0938	-6.6875	-27.4375	12.7188	0.71875	-13.6875	-32	-2.5	-3.71875	-44.9375		0.02014
0.02018	14.5	3.0625	-2.25	-0.625	-17.6562	32.2188	27.75	-9.46875	-26.4688	-28.875	14.8438	-9.5	0.02018	-10.25	13.4062	-2.34375	-38.1562	-4.625	-9.65625	17.5312	1.125	-3.28125	-12.1875	-7.0625	-10.7812	15.1562	-18.5	-38.625	-16.3438	39.4062	5.5	-9.53125	0.1875	-6.84375	0.02016	0.15625	-31.9375	-1.09375	4.46875	2.9375	-25	-8.40625	-12.2188	-23.3438	-26.7188	-3.96875	-5.375		0.02016
0.0202	19.125	9.875	-19.2812	11.0938	-0.0625	-7.90625	-8.1875	-32	18.9062	-1.25	-12.7812	-13.9375	0.0202	22.125	-7.5625	-26.7812	-2.6875	22.2188	-25.8125	15.6875	-12.25	-37.9375	-18.4688	-2.5625	-6.6875	-0.625	-12	22.4688	35.8438	-27.3125	5.5	9.34375	1.59375	-7.1875	0.02018	23.4688	-11.7188	-12.7188	5.53125	-23.8438	-3.3125	2.34375	14.1562	-5	-28.1562	-10.5625	21.5312		0.02018
0.02022	-31.3438	-11.9375	-12.3438	-21.25	-10	-1.09375	-12.6562	15.2188	-17.4375	-7.6875	-13.8125	-25.4375	0.02022	21.4688	-45.3438	22.5312	13	-26.625	12.0938	-16.5	-42.5312	-7.78125	34	11.1875	21.6562	-10.5625	-16.9375	13.625	-1.125	-15.5625	-11.375	25.625	14.4688	-7.28125	0.0202	9.15625	24.4688	1.21875	-10.9688	24.9688	-17.75	-13.2812	1.96875	-3.5625	24.0625	-12.0938	-26.4062		0.0202
0.02024	-0.71875	-13.5625	5.0625	-14.3125	-1	7.59375	17.9375	-9.875	-32.0312	3.8125	-5.90625	19.2188	0.02024	-14.1562	27.7812	6.4375	-21.9688	-8.28125	-7.78125	9.71875	-39.25	1.4375	-21	-16.3125	-10.4375	-0.125	-11.9062	-44.1562	-12.25	39.0312	-1.5625	-34.125	-13.375	0.46875	0.02022	-21.5938	-8.71875	6.34375	9.1875	15.5625	7.625	-9.4375	-18.9062	-36.5312	20.5625	7.75	-15.4375		0.02022
0.02026	5.25	20.4688	-20.9062	-19.3125	21.0938	-3.90625	12.8125	-26.0938	33.1875	0.46875	-12.2812	-17.3438	0.02026	21.0312	15.0312	-38	-15.0938	10.25	-3.03125	21.625	42.4375	-5.96875	-8.125	-0.71875	4.90625	-19.2812	-26.4062	-1.53125	0.46875	-27.0625	-12	-11.6875	-8.8125	-1.9375	0.02024	-9.5	-23.9375	8.625	14.4688	-40.6562	24.5625	-2.84375	-6.625	0.15625	-19.25	22.2188	21.25		0.02024
0.02028	-37.875	3.21875	19.3125	-5.71875	-22.9375	0.59375	-15.5312	16.5938	-12.3125	-4.71875	5.4375	-30.8125	0.02028	8.75	-26.5938	7.40625	16.9375	-2.53125	12.5938	-9.125	15.875	-2.78125	-3.3125	24.4375	0.03125	-0.875	-10.5	18.125	-2.65625	-23.2188	11.9375	27.2188	2.0625	-38.3438	0.02026	18.3125	42.25	-14.0938	-27.125	15.3438	12.8125	-29.625	18.6562	9.5	6.21875	-13.4375	9.9375		0.02026
0.0203	-30.0312	-1.09375	-23.1562	9.90625	-18.25	-1.46875	11.5312	22.625	-23.8125	-10.5312	-5.90625	-0.71875	0.0203	-33.4062	21.3438	-18.5938	2.875	-7.03125	2.40625	-38	-12.2188	6.9375	8.5625	-4.4375	18.4062	-6.25	-5.75	-41.9062	-20.5938	15.75	-10.75	-21	-7.71875	-21.125	0.02028	-19.8125	-0.4375	-2.34375	16.9688	15.4375	-31.2188	-2.625	-2.65625	-27.3125	-15.9375	-20.7188	-19.2812		0.02028
0.02032	17.25	-14.5938	-11	-27.2188	-10.4688	-15.0312	25.0312	-42.0625	12.7812	7.125	-18.0312	10.8125	0.02032	24.0312	18.4062	-39.625	-14.5	-7.53125	5.875	30.75	4.0625	-14.4062	-13.5312	-11.8438	-47.25	-32.9375	-21.4375	14.5625	1.96875	1.53125	-23.8125	-29.1562	-3.15625	30.875	0.0203	-18.9375	-21.1875	-23.3438	10.2812	-24.0625	-7.3125	16.0938	1.46875	6.21875	-10.125	-12.25	6.5625		0.0203
0.02034	-21.8438	-46.125	7.09375	-38.0312	16.8125	-6.59375	-28.4062	-0.84375	-21.2812	7.59375	4.28125	-30.8125	0.02034	9.21875	-20.1875	-15.875	-16.9375	19.4375	27.2188	-4.90625	-3.5625	-32.9688	-9.53125	2.15625	6.59375	16.4375	-10.0938	44.4062	14.375	-18.2188	16.8125	14.6875	9.15625	-32.9375	0.02032	40.875	15.5312	5.71875	-16.6875	-33.375	14.4375	-17.9688	17.5	27.9062	-17.4688	-11.5	-10.2188		0.02032
0.02036	-10.5	-1.75	15.6875	-18.3125	-39.0938	3.8125	-13.7188	25.7188	19.875	-13.4375	14.4688	-19.0312	0.02036	-28.9375	-9.6875	-1	-12.3438	-18.4062	22.7812	-3	8.1875	23.5	-7.25	-12.4375	3.125	27.1875	0.78125	-32.9375	-16	-2.625	-21.6875	-36.125	4.78125	-13	0.02034	-6.0625	-3.28125	6.34375	-19.0312	6.4375	-25.7812	-21	16.4062	-9.375	-15.875	-19.25	-20.4688		0.02034
0.02038	22.875	0.8125	-46.5312	3.125	-9.90625	-12.125	-12.125	-32.6562	2.40625	-12.3438	17.4062	23.5625	0.02038	-11.9688	21.5	-18.6562	27.0938	-10.9062	14.5625	-19.0938	1.96875	-19.4688	-19.1562	-21.375	-22.1562	-22.75	-5.59375	-2	-3.71875	-2.5	-6.21875	-14.0938	1.65625	5.59375	0.02036	-17.7812	-30.2188	-36.4062	27.0625	24.5312	3.25	15.4062	-9.40625	-26.5312	-4.0625	3.78125	-12.9062		0.02036
0.0204	-27.4062	-34.3438	-15.0938	-20.0938	29.5625	-19.0625	-34.6562	-13.4062	15.3438	3.90625	-3.1875	4.375	0.0204	14.1562	10.6875	-2.09375	0.125	2.78125	-6.40625	0.65625	-2.59375	-10.7188	-7.78125	4.15625	16.9688	-12.8125	-26.3438	35.875	24.0938	-25.2812	-16.125	12.0625	-3.5625	0.15625	0.02038	2.40625	19.9375	-0.15625	-9.84375	7.9375	12.0938	30.4688	0.4375	7.4375	-6.15625	13.2812	6.1875		0.02038
[truncated: 13,980 more rows]
[truncated: 25 more columns]

## Sheet: Fig2
panel 2a,c,d		panel 2b		panel e									panel f									panel g								panel h
[truncated: 102,499 more rows]

## Sheet: No Gd3+
Recording File	Peak Current by UV at -70 mV (nA)	Power (mW)		∆V (mV) by UV	AP by UV	Labeling	∆V (mV) by Injecting I
[truncated: 23 more rows]

[truncated: 6 more sheets: Gd3+, Fig3f, Fig5c, SupFig1, SupFig2, SupFig3]
